# Supplementary material
Source: PubMed Central journal article supplement (PMC8273918)

Alanine pval= 0.7945 pvalf= 0.2529 pvalm= 0.2886

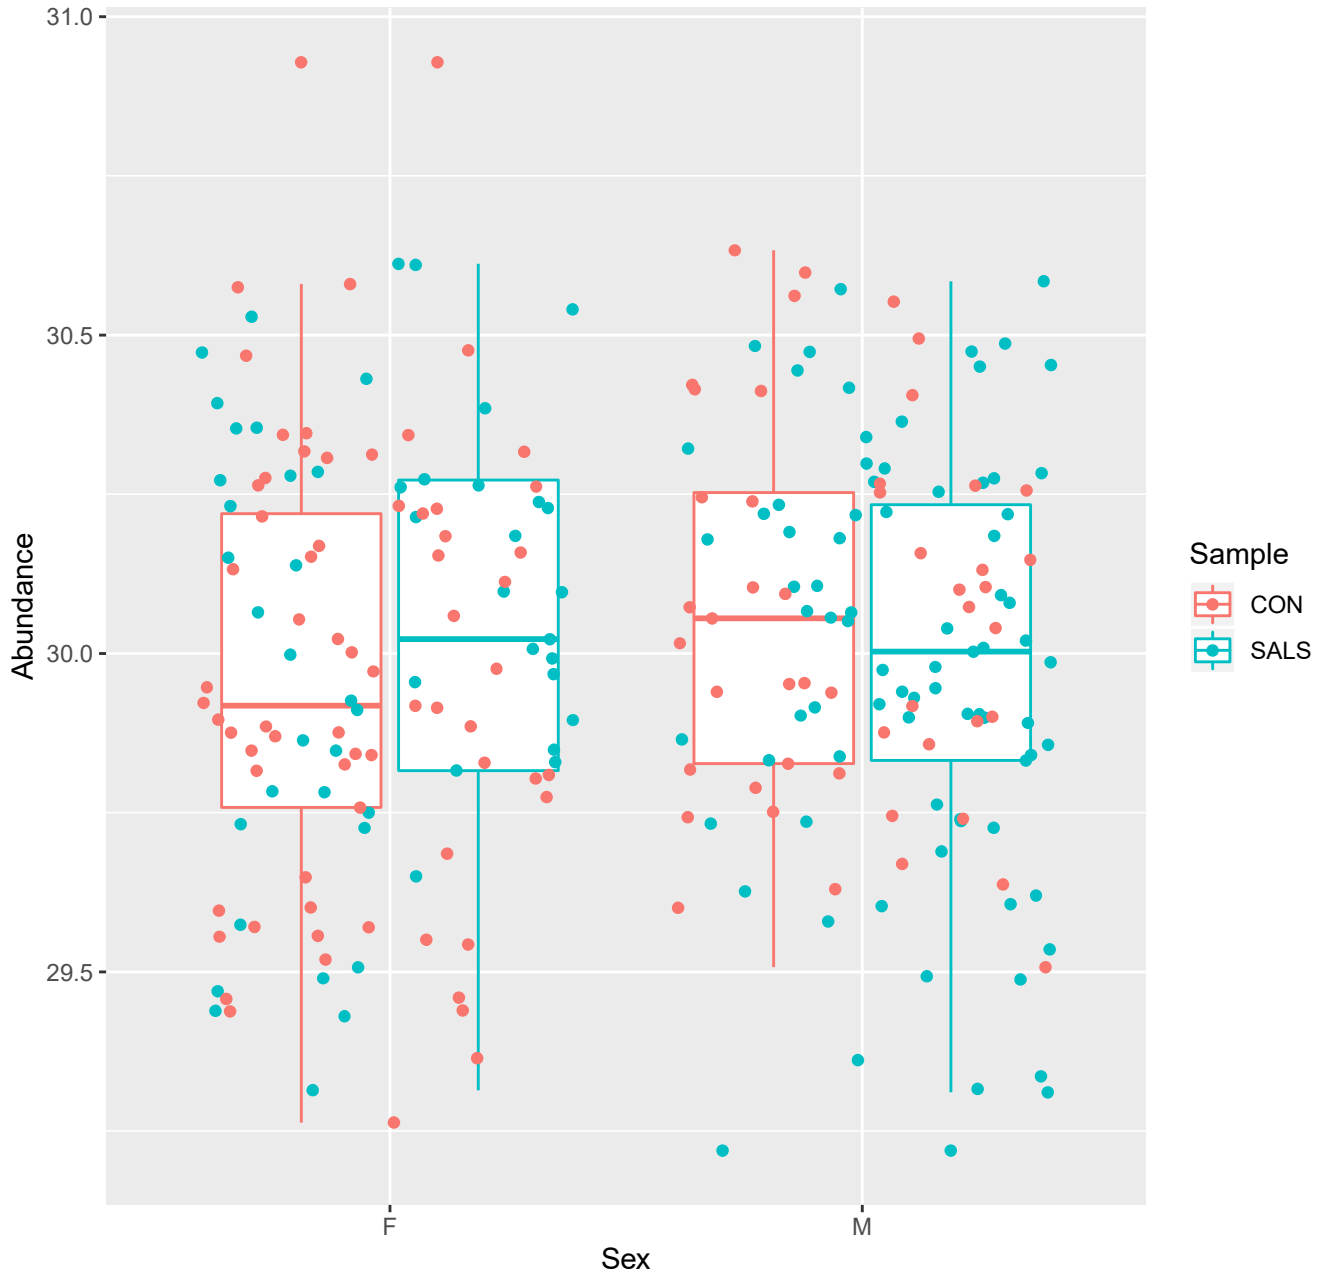

Arginine pval= 0.0555 pvalf= 0.6045 pvalm= 0.0166

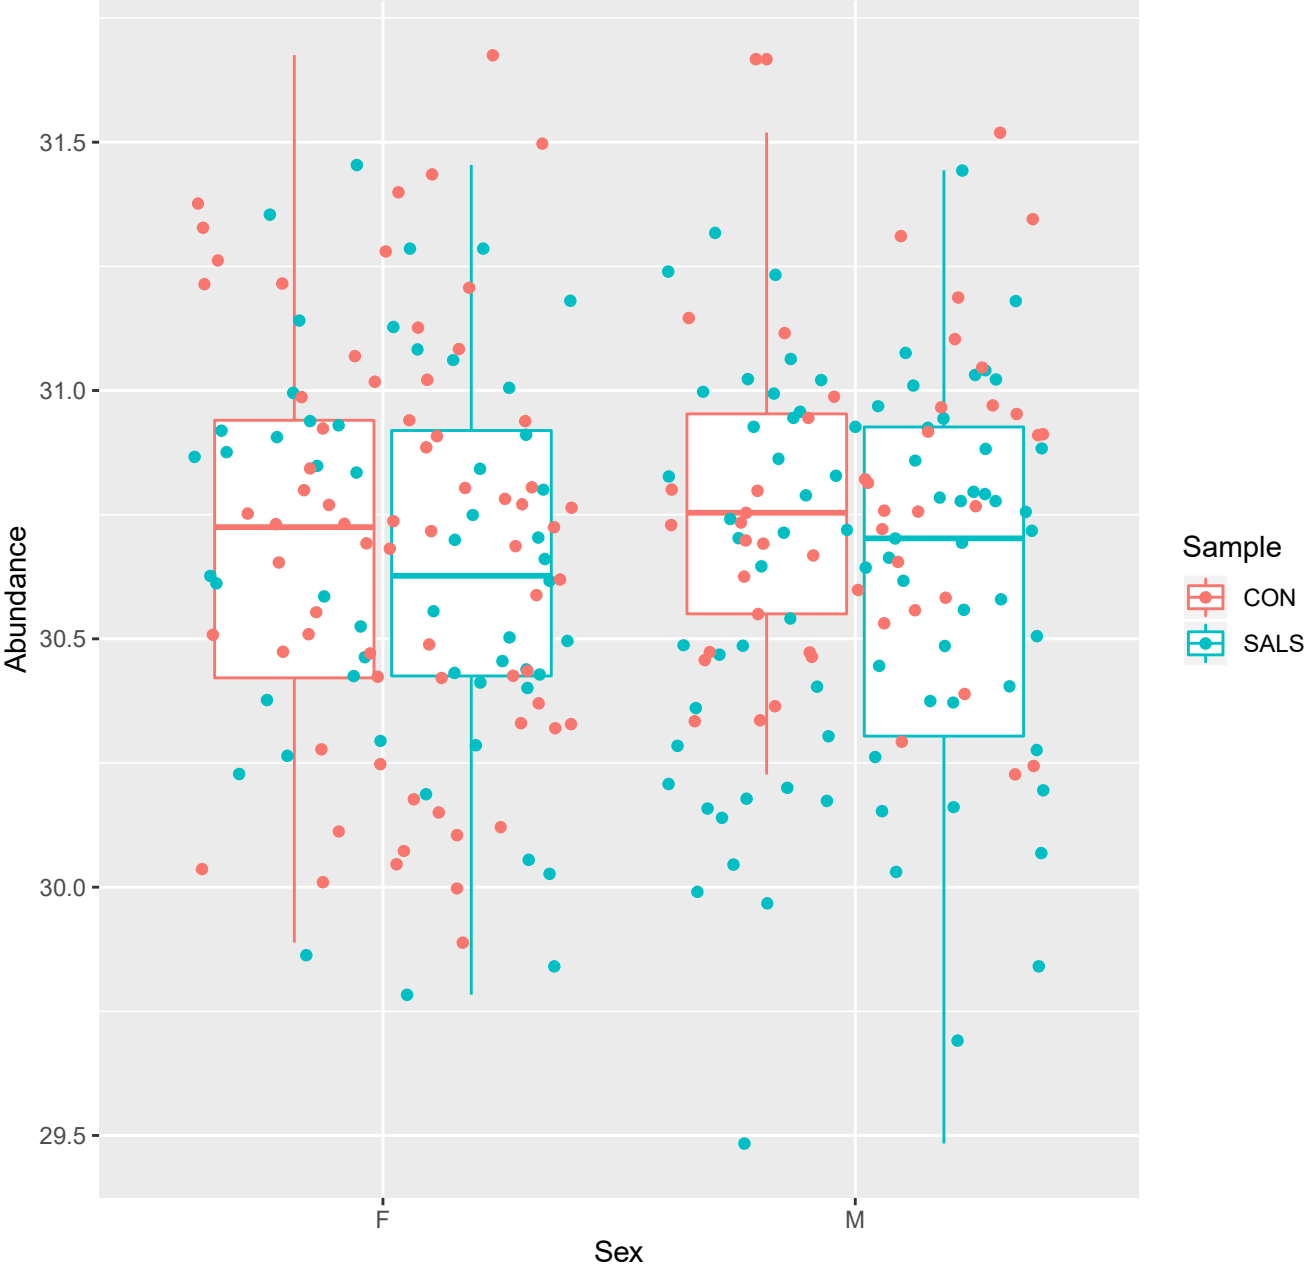

Asparagine pval= 0.8559 pvalf= 0.7088 pvalm= 0.8407

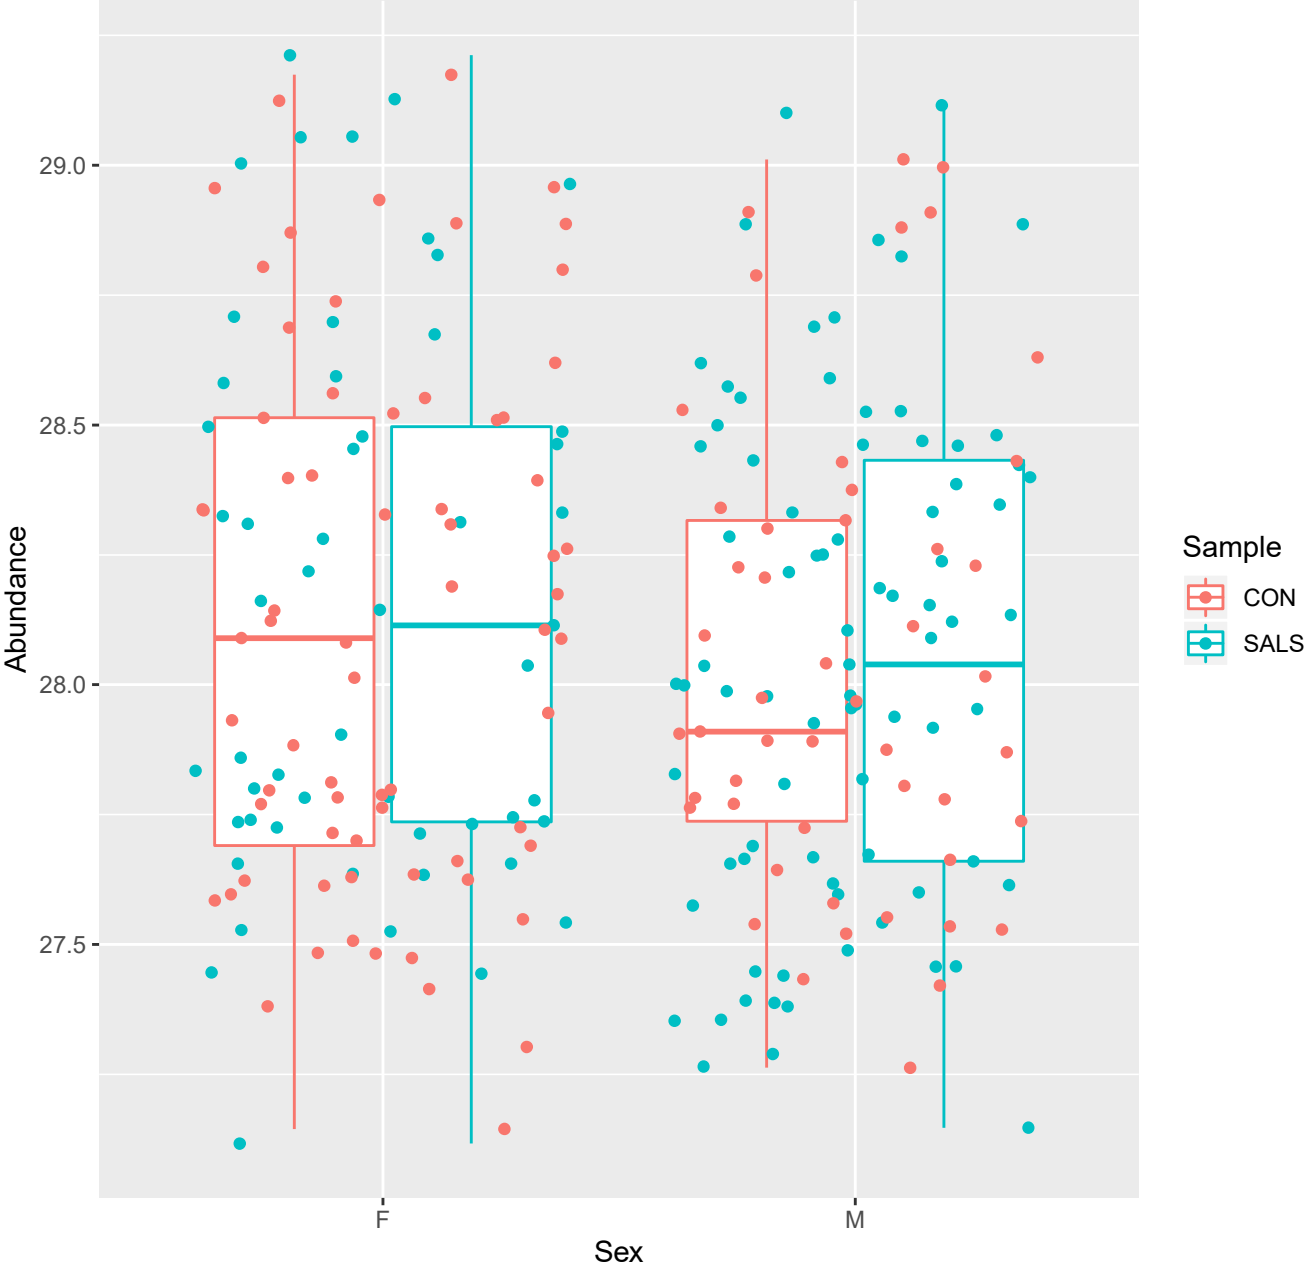

Aspartic.acid pval= 0.6061 pvalf= 0.9893 pvalm= 0.4003

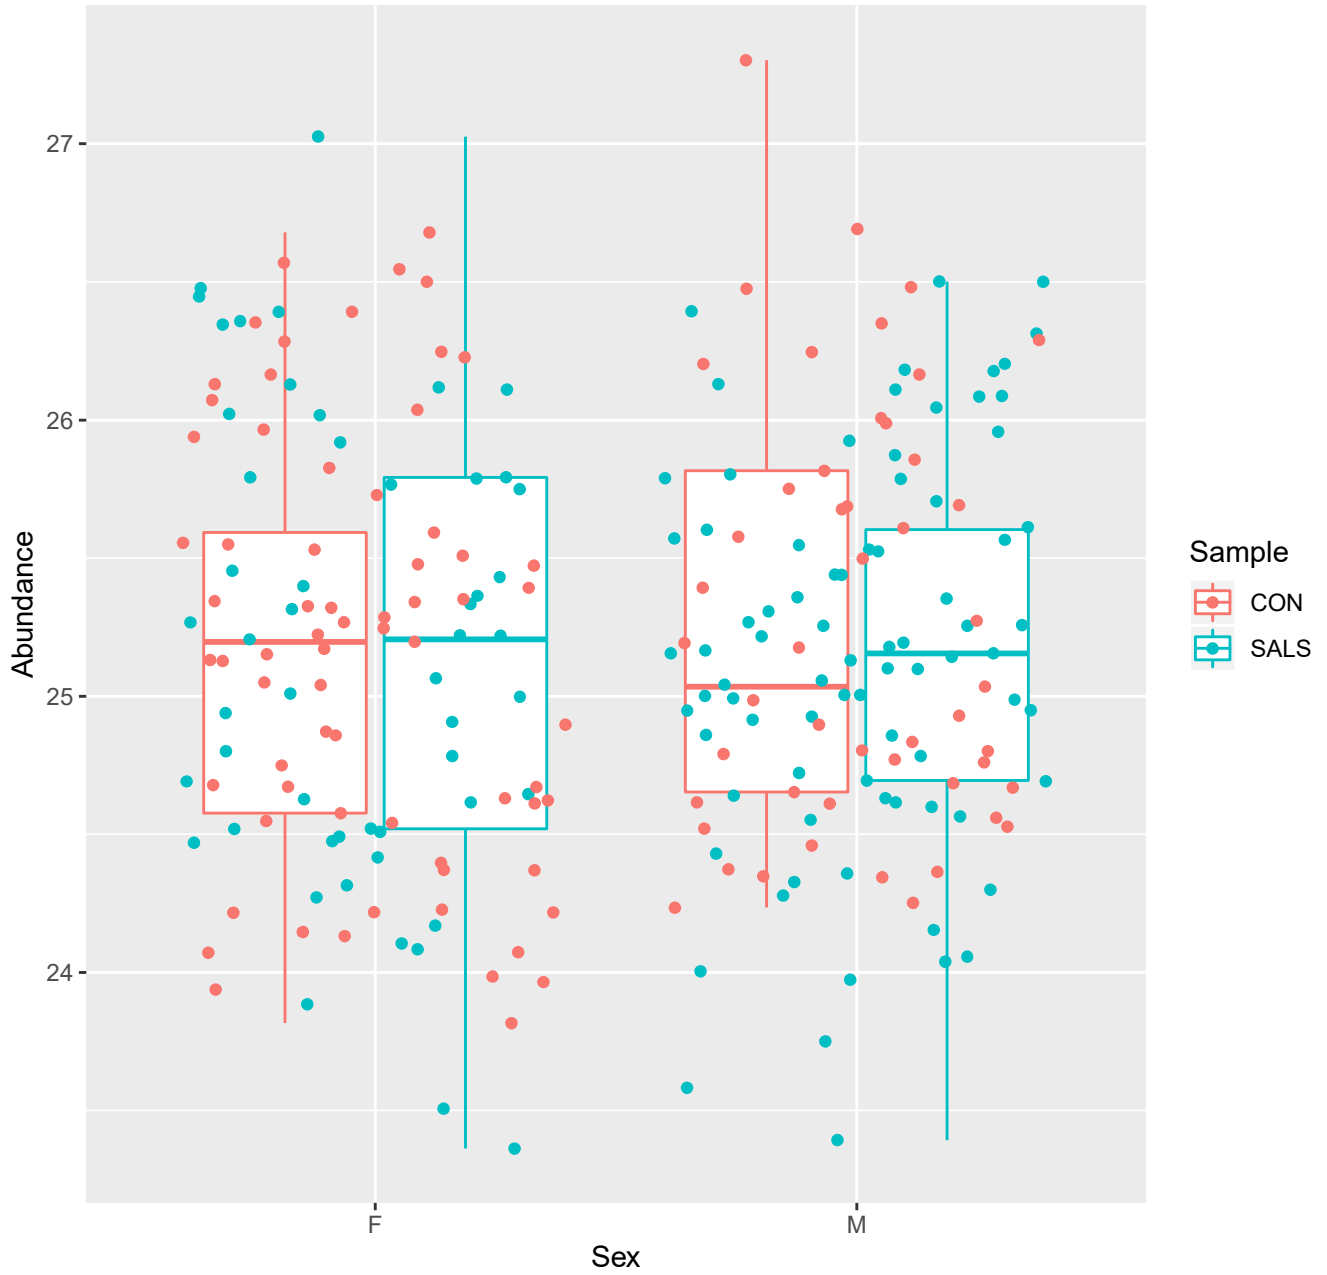

Cysteine pval= 0.8148 pvalf= 0.5355 pvalm= 0.9051

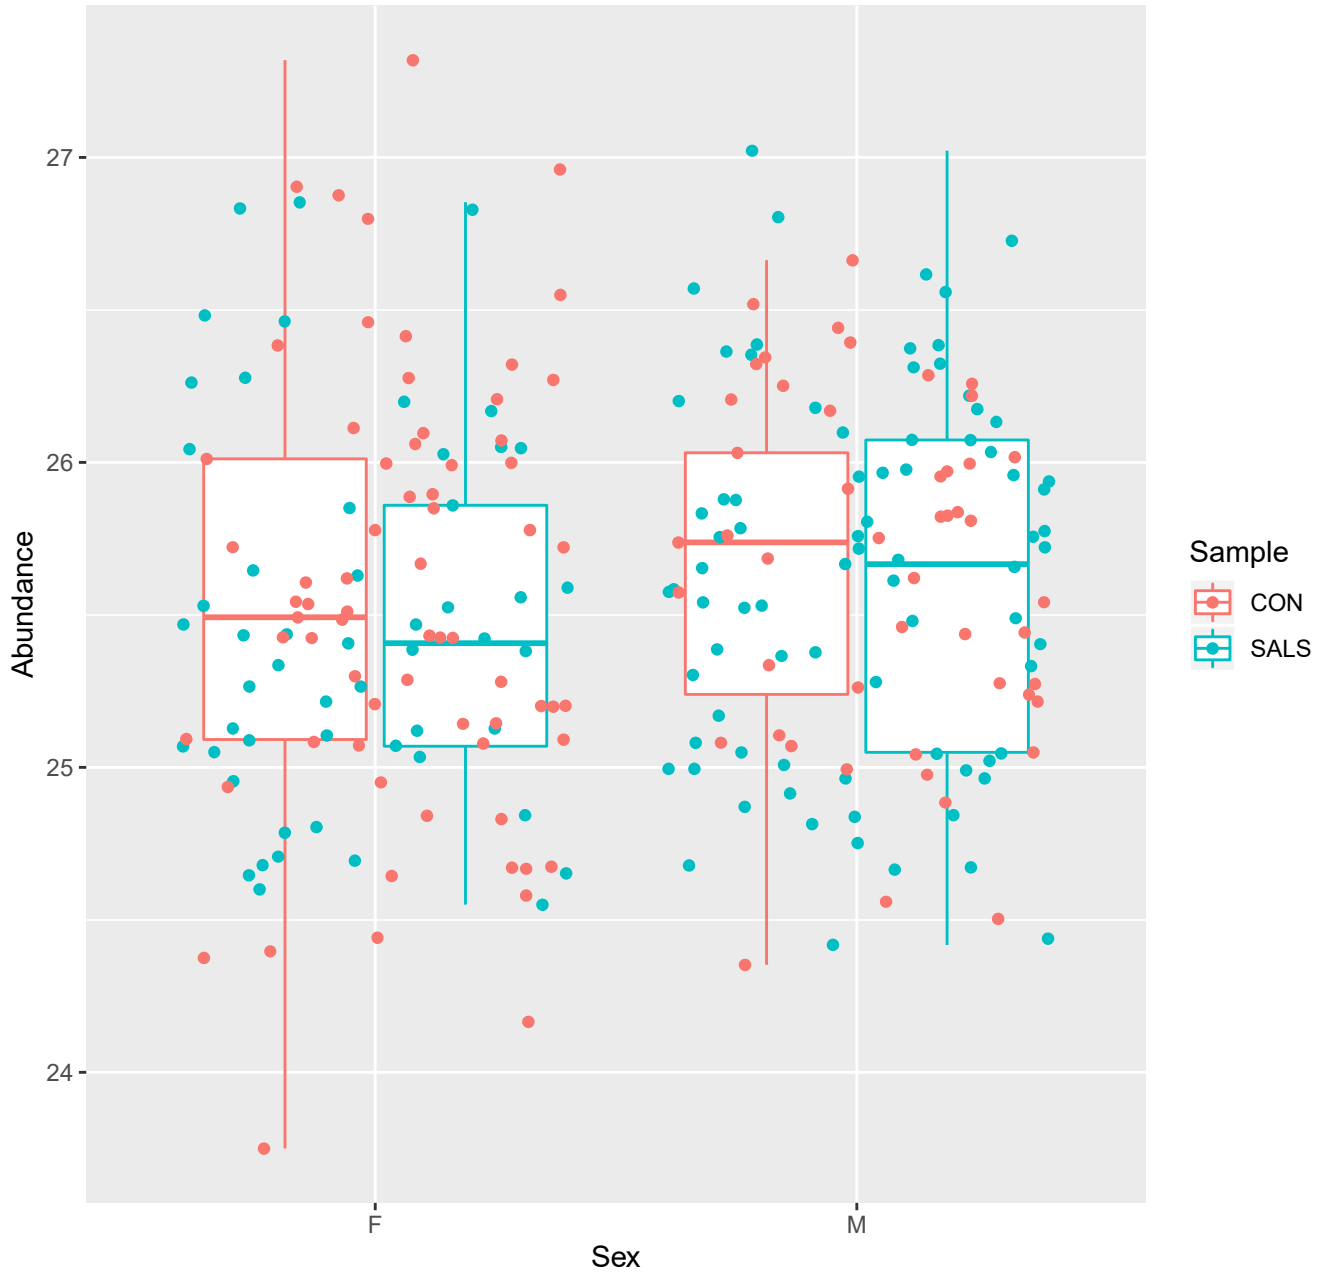

Glutamine pval= 0.9711 pvalf= 0.938 pvalm= 0.8089

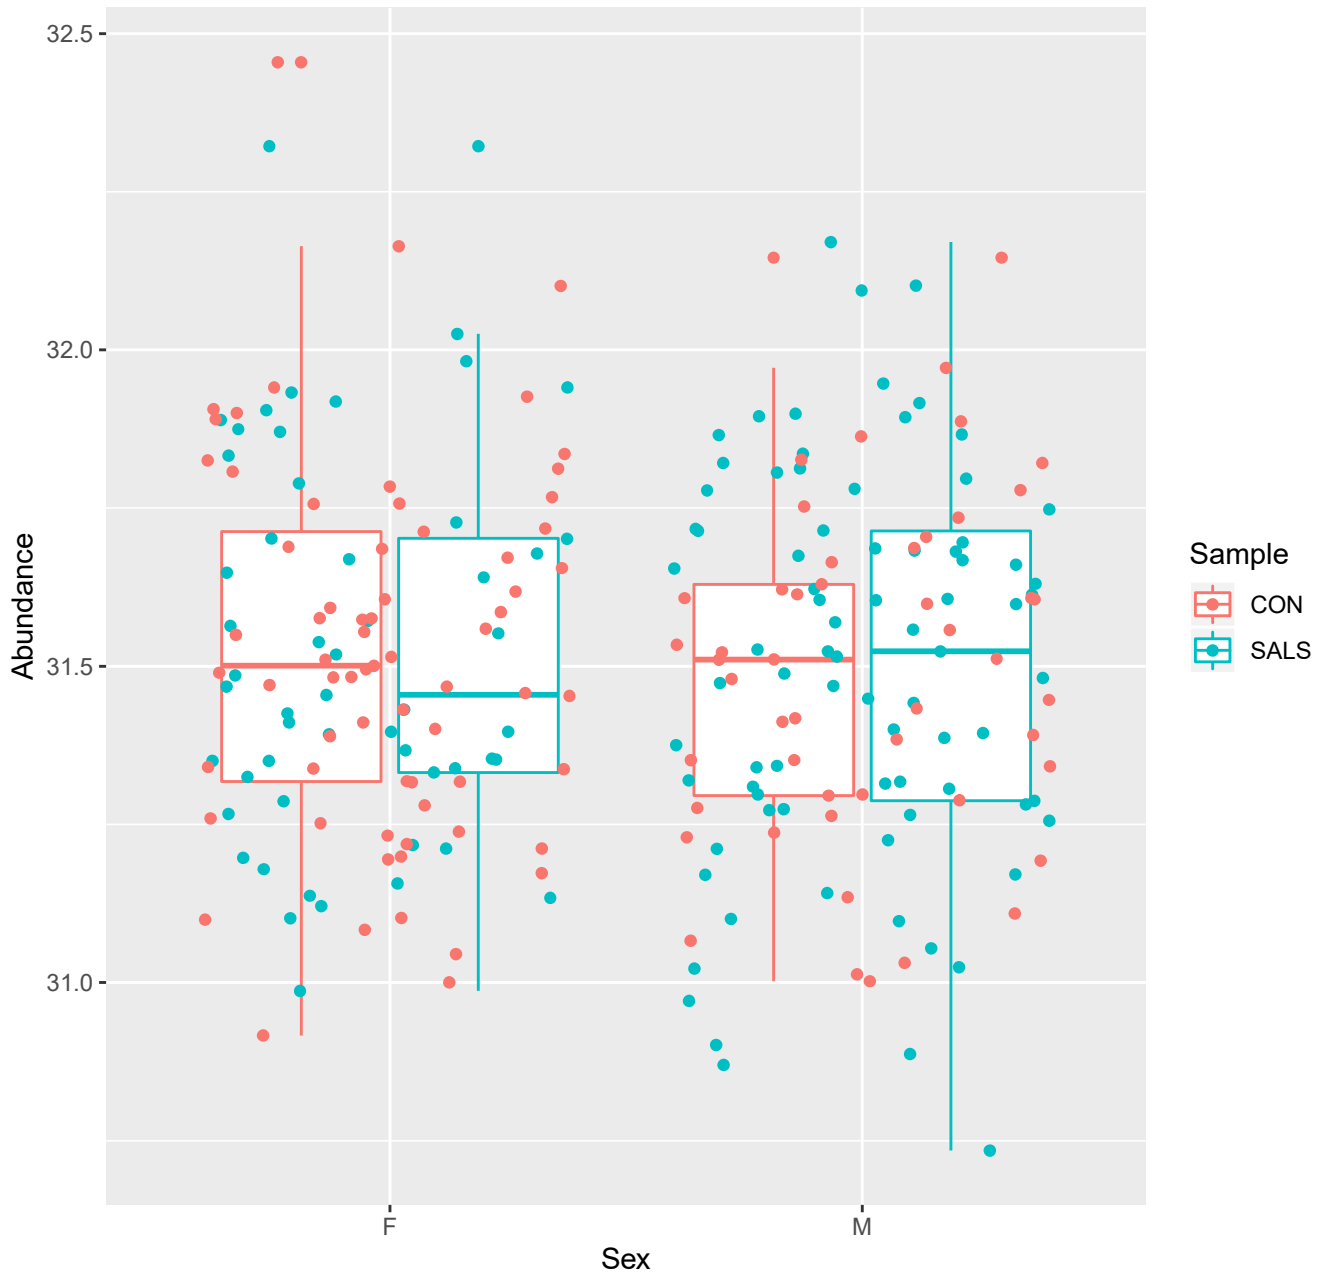

Glutamic.acid pval= 0.1016 pvalf= 0.3322 pvalm= 0.3379

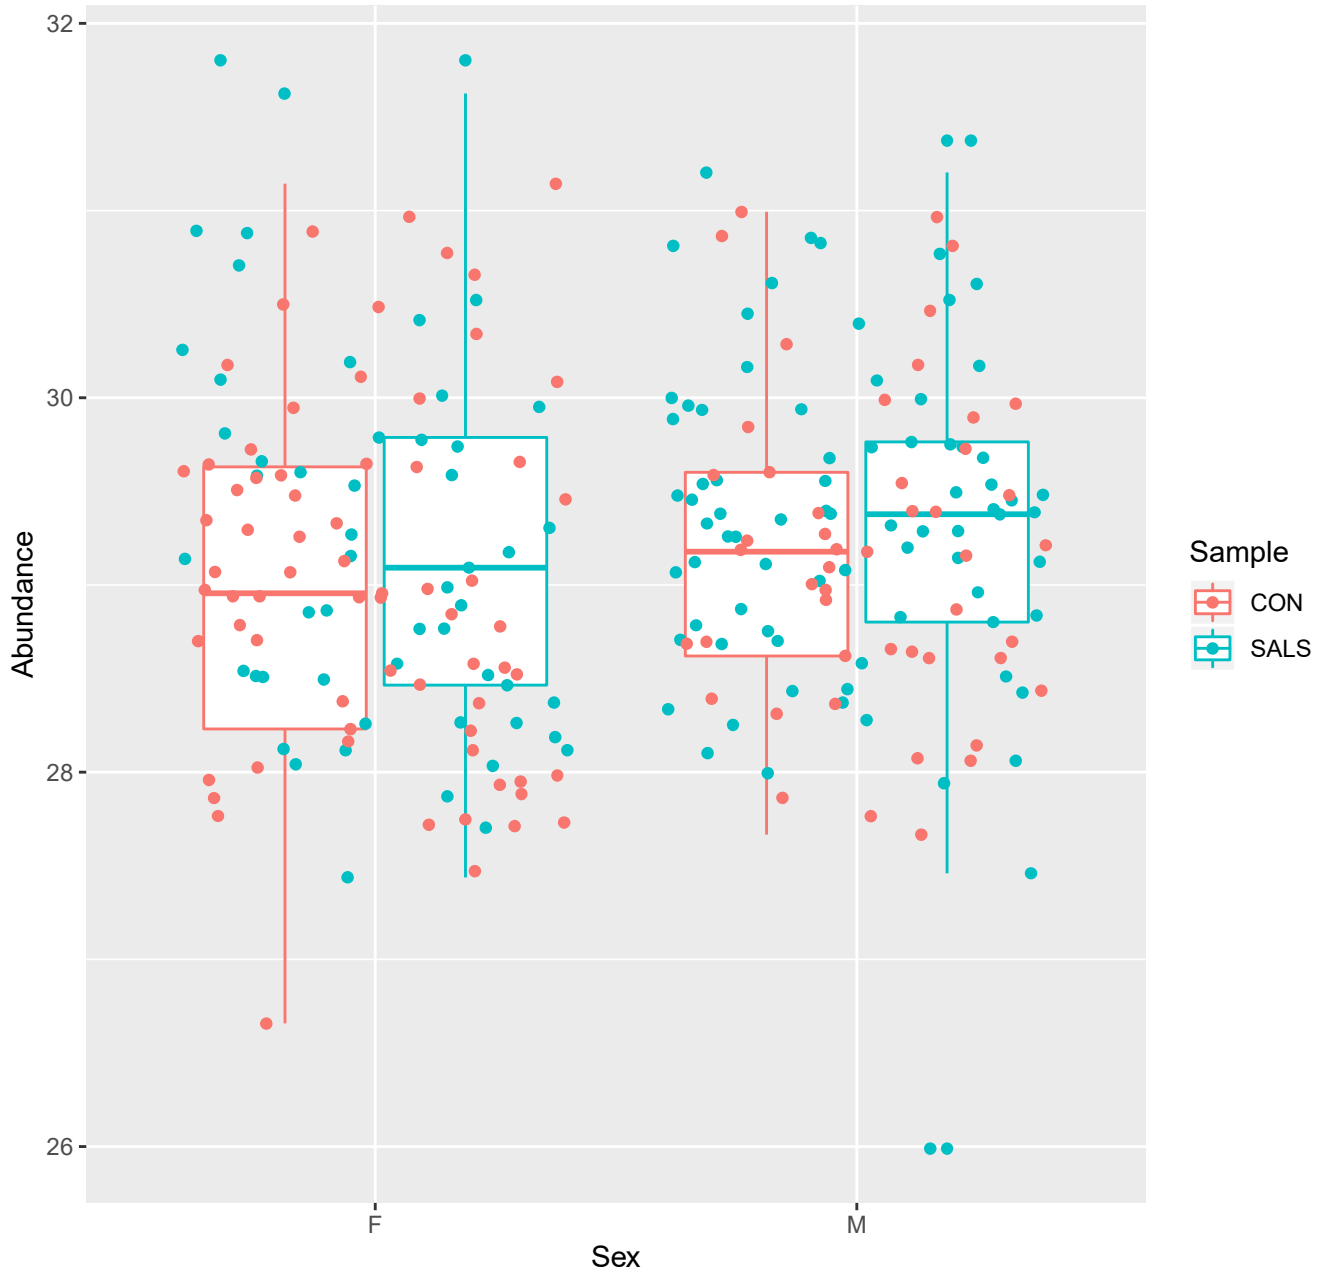

Glycine pval= 0.4022 pvalf= 0.028 pvalm= 0.938

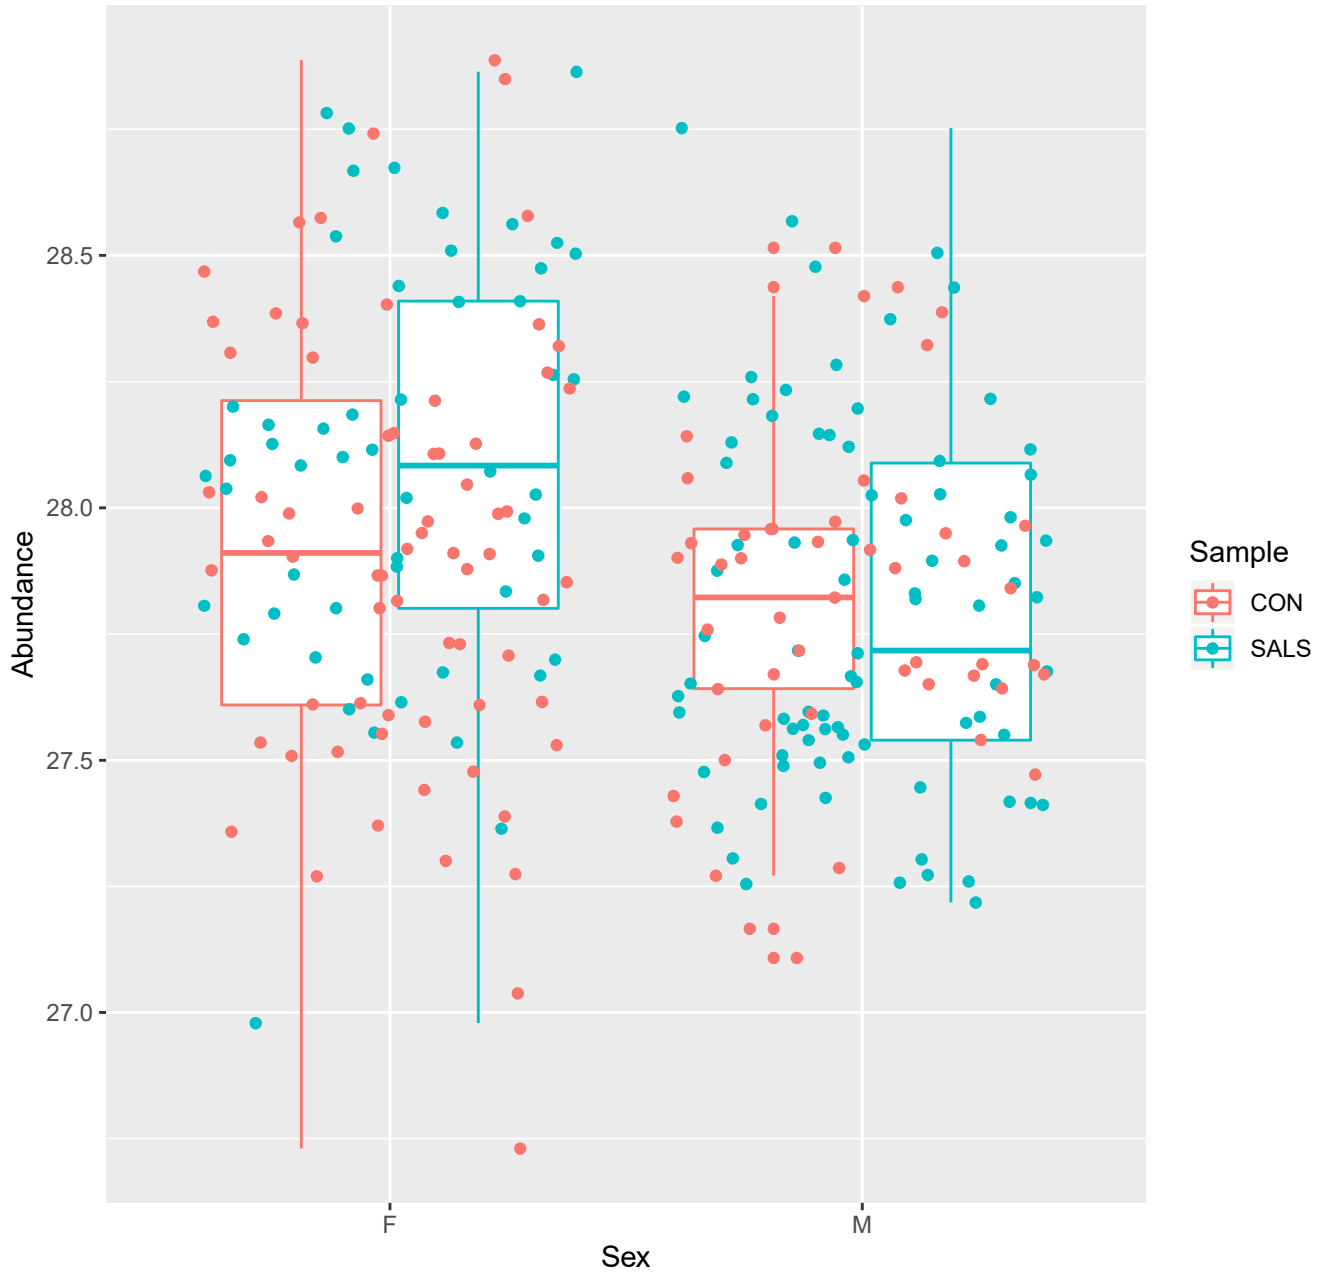



Histidine pval= 0.0025 pvalf= 0.0619 pvalm= 0.0156

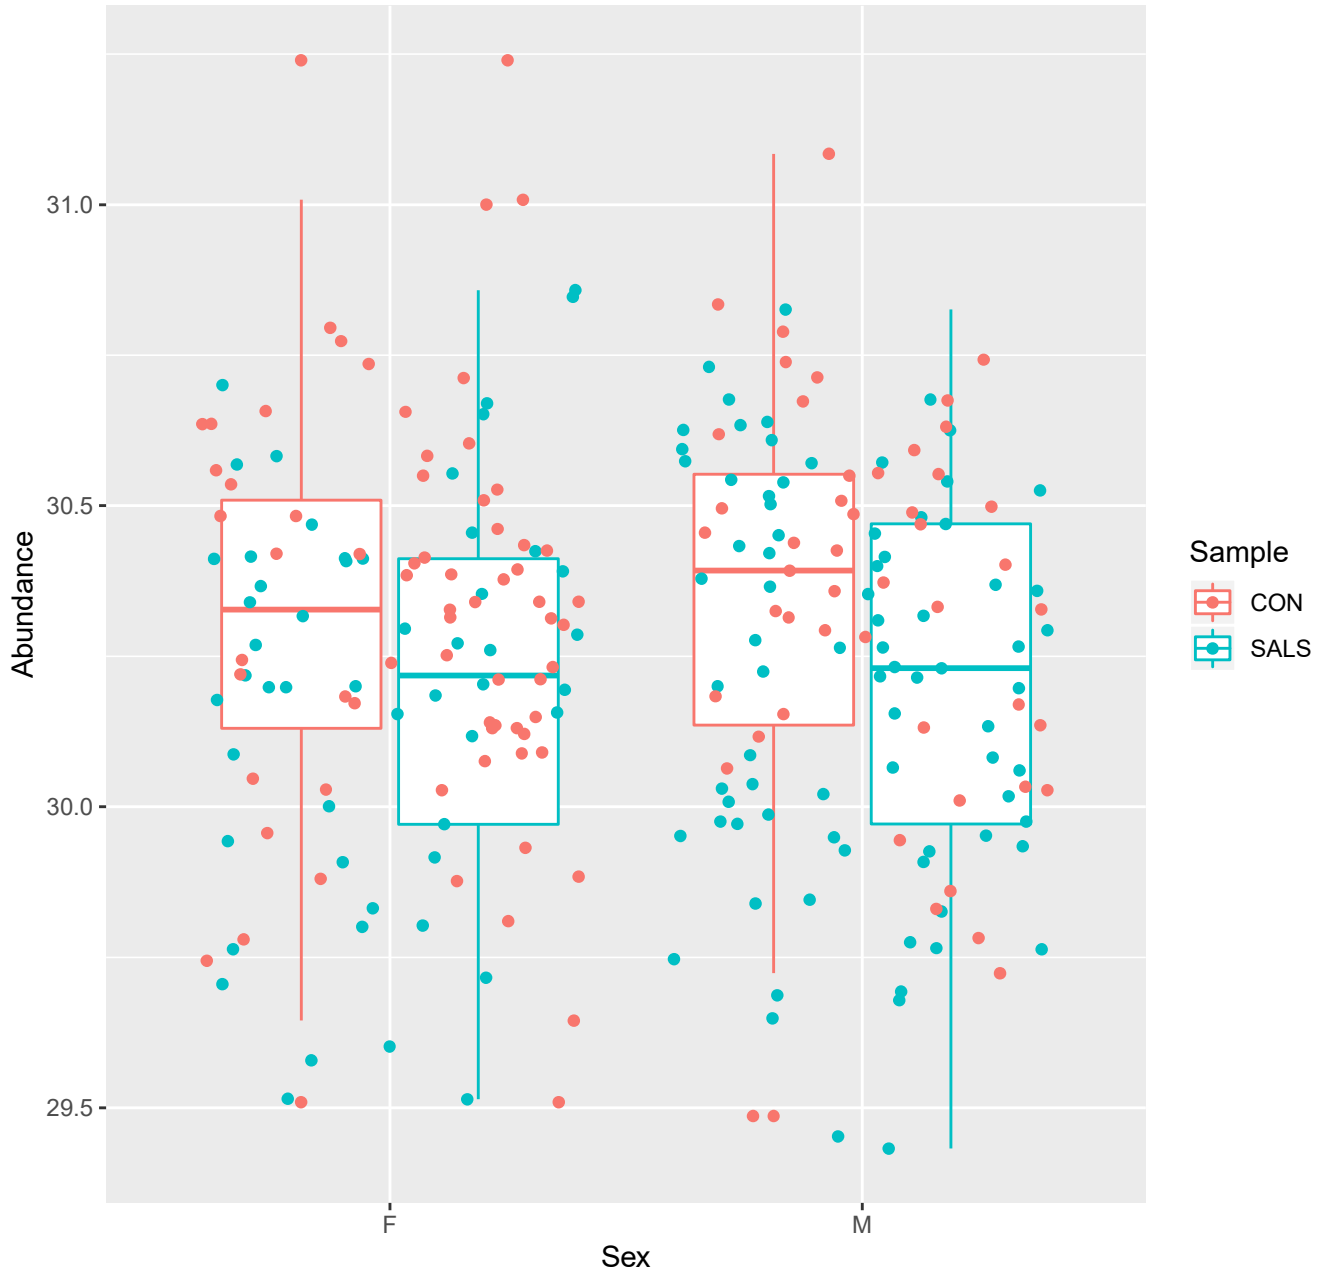

Isoleucine pval= 0.4763 pvalf= 0.4694 pvalm= 0.0323

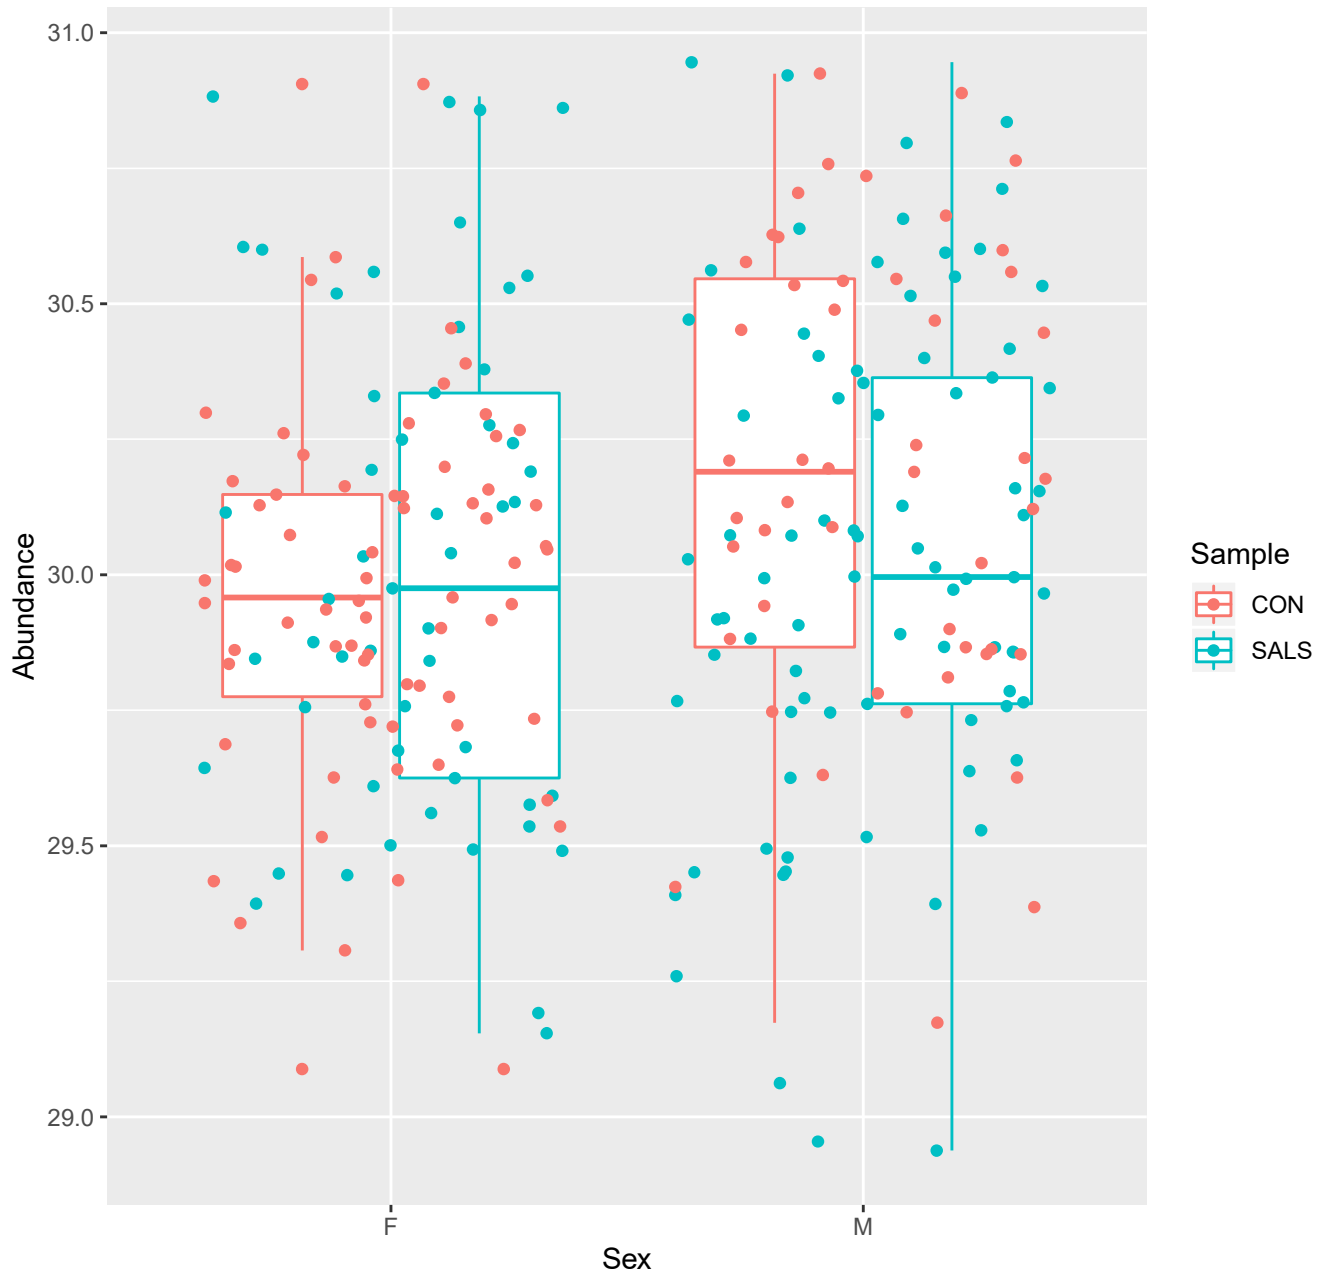

Leucine pval= 0.1769 pvalf= 0.9572 pvalm= 0.012

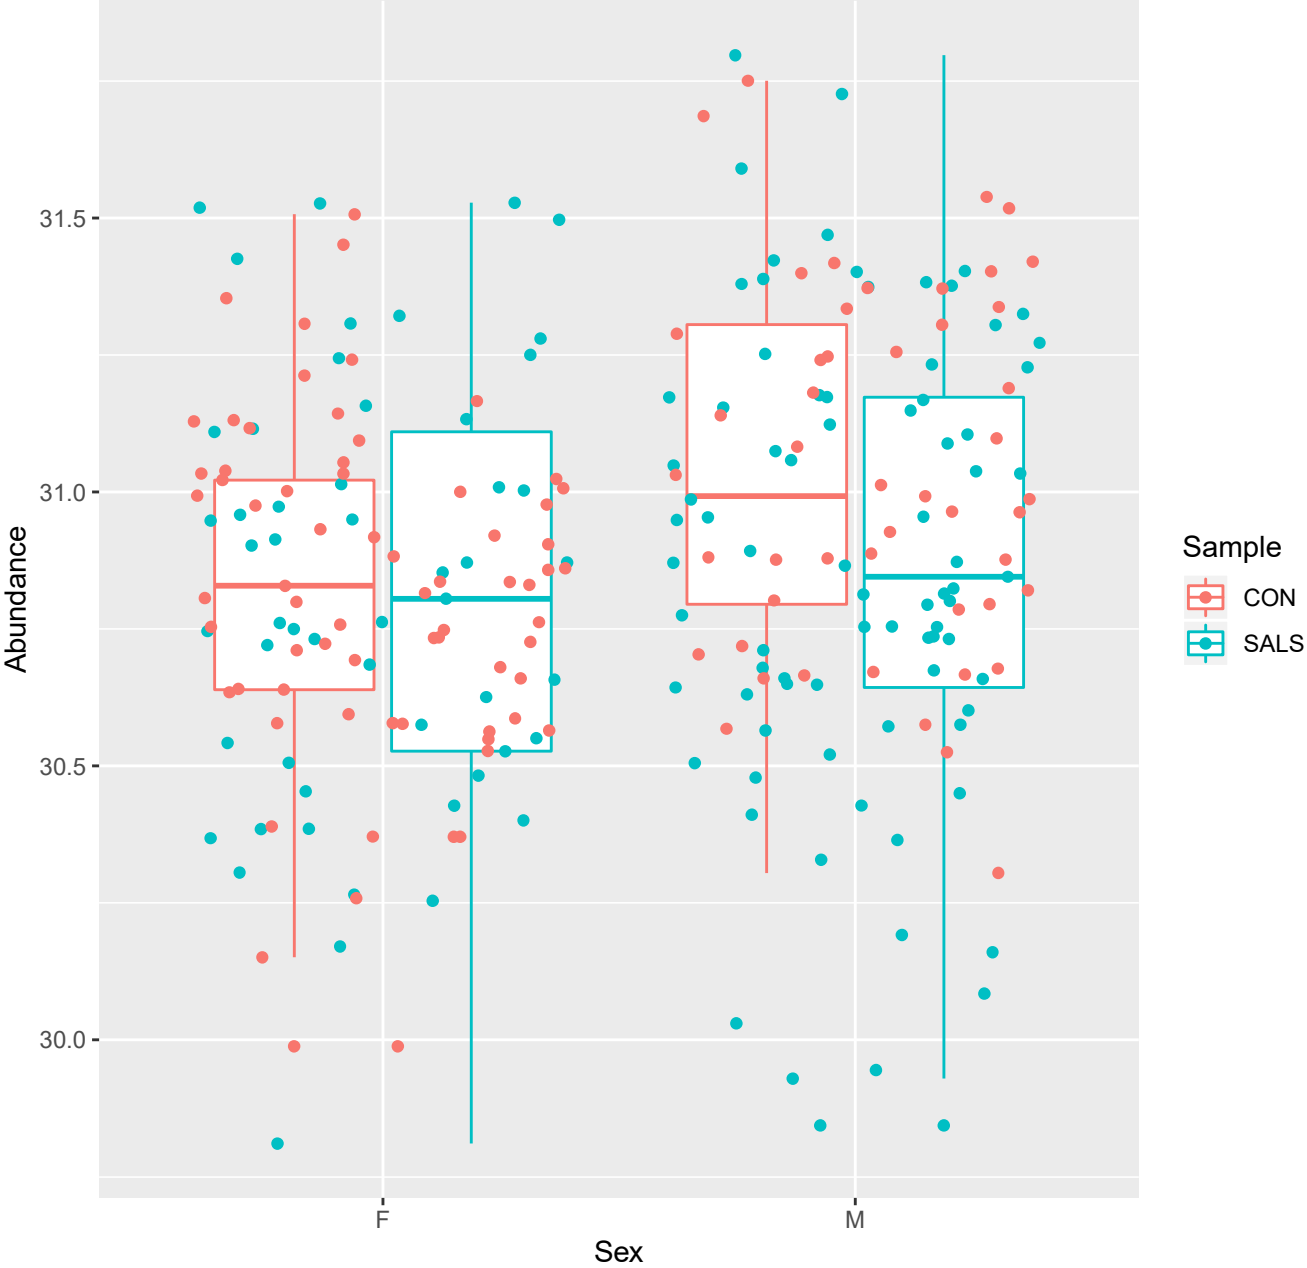

Lysine pval= 0.8316 pvalf= 0.1392 pvalm= 0.1754

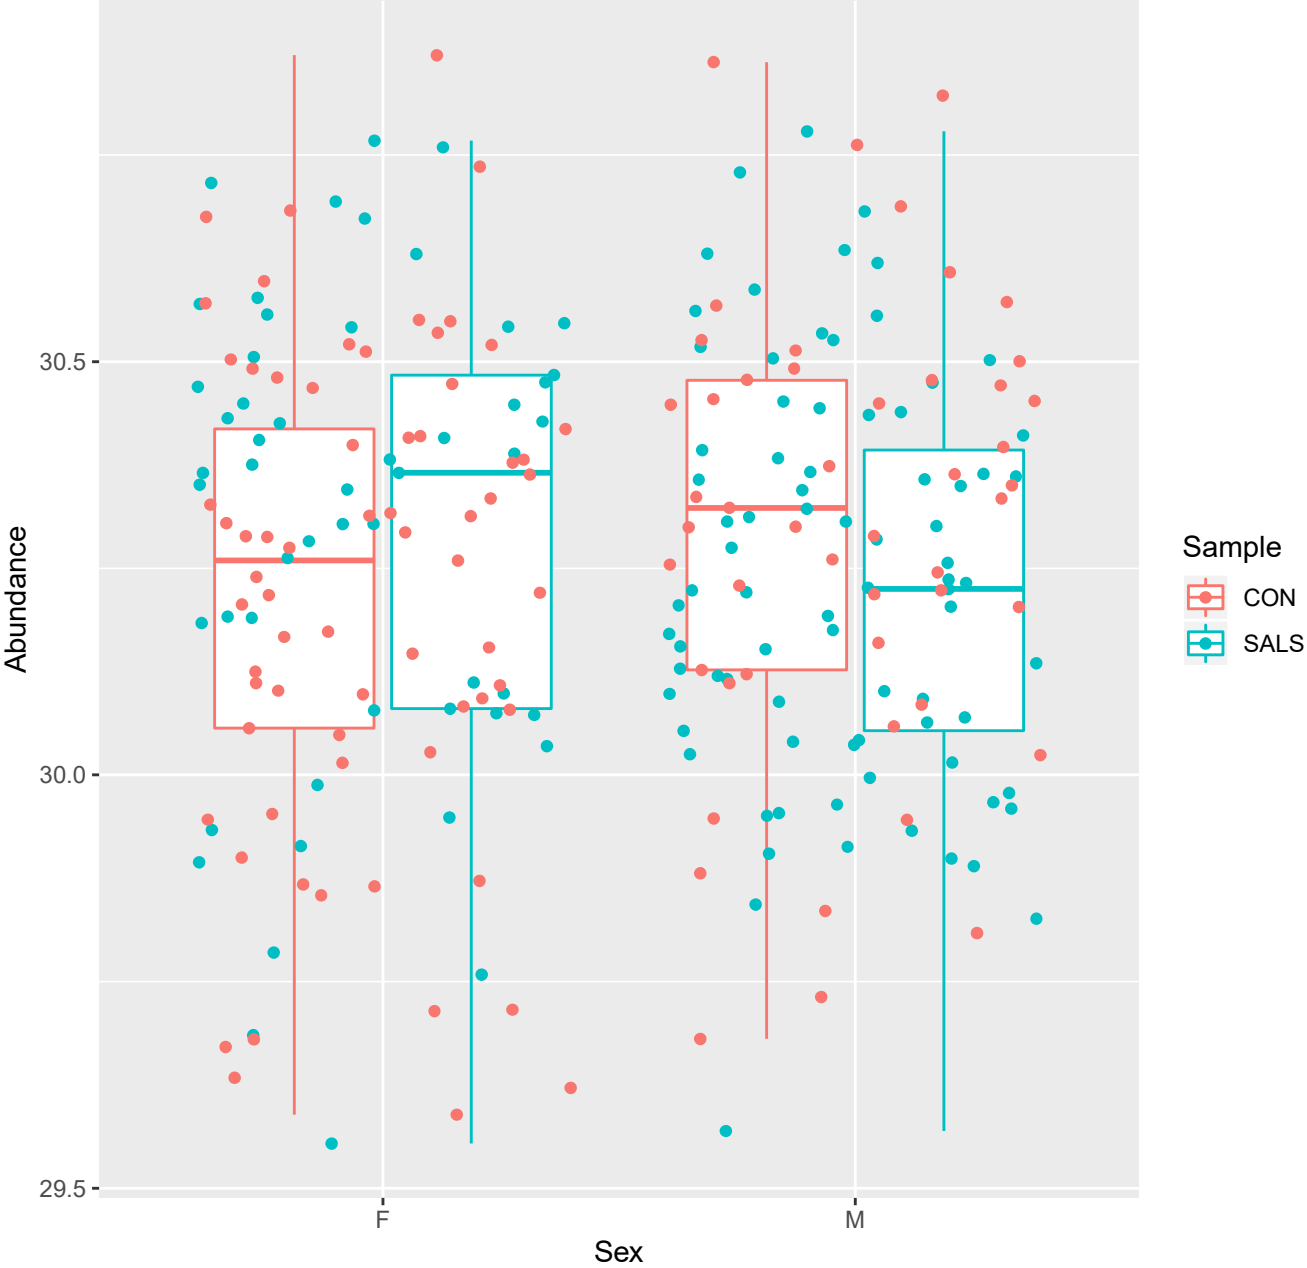

Methionine pval= 0.334 pvalf= 0.1518 pvalm= 0.0028

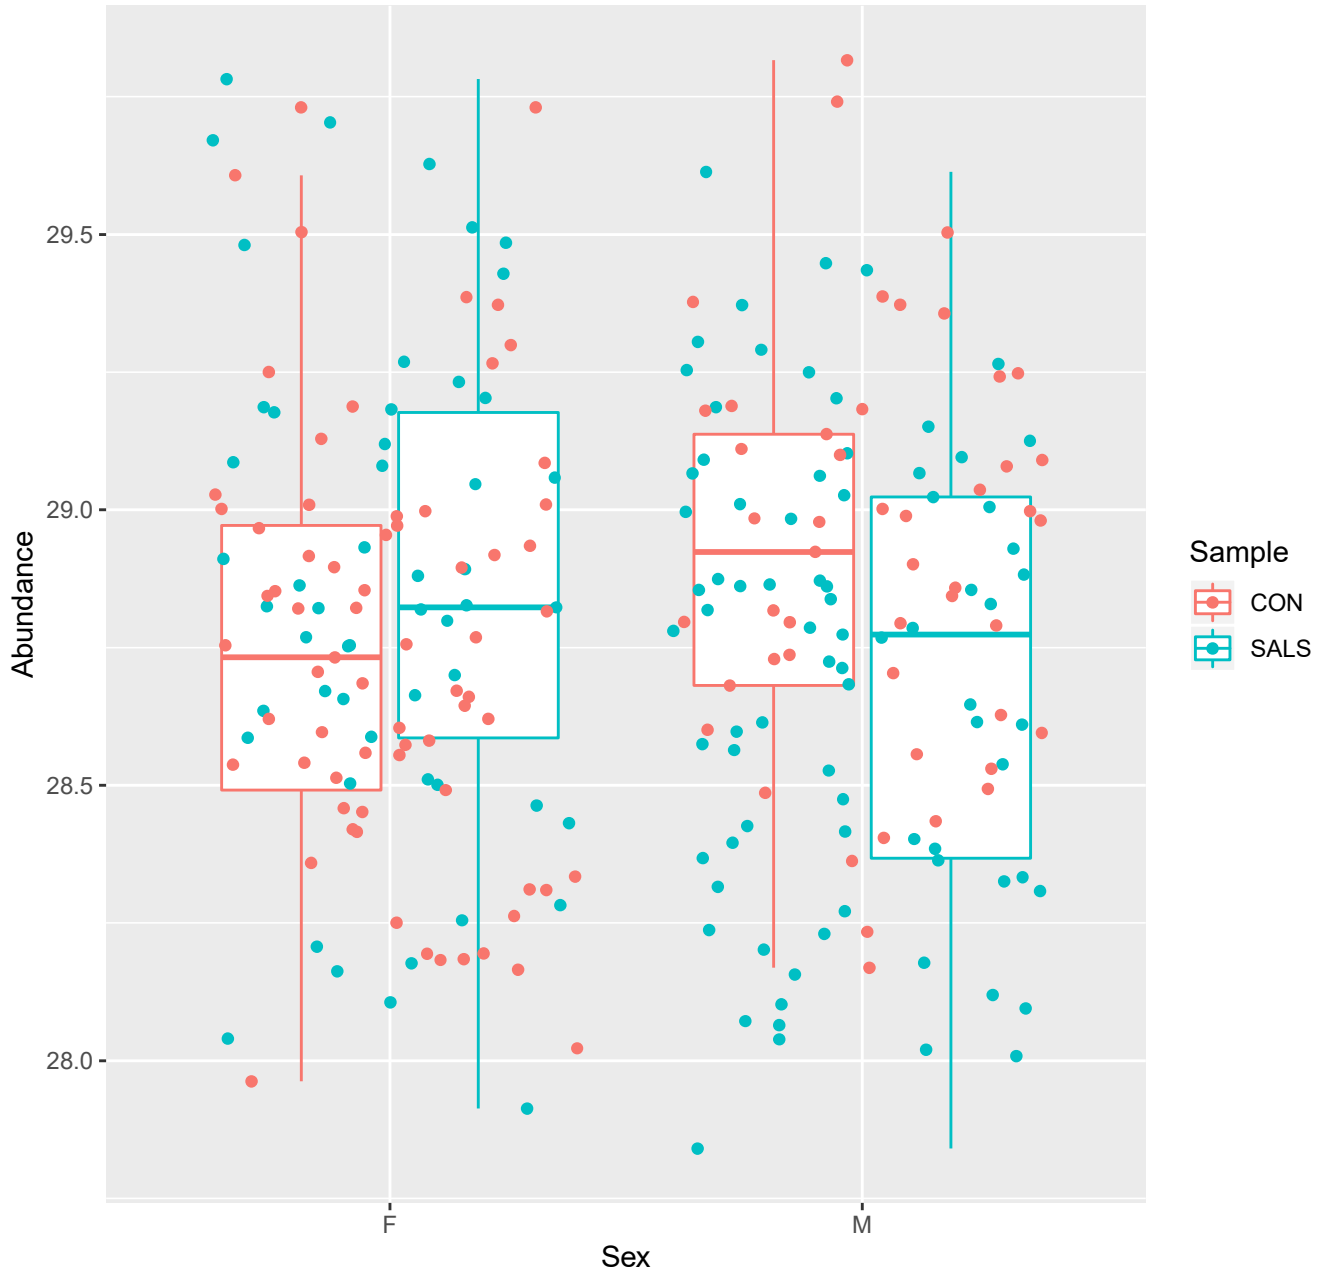

Phenylalanine pval= 0.1495 pvalf= 0.2385 pvalm= 0.001

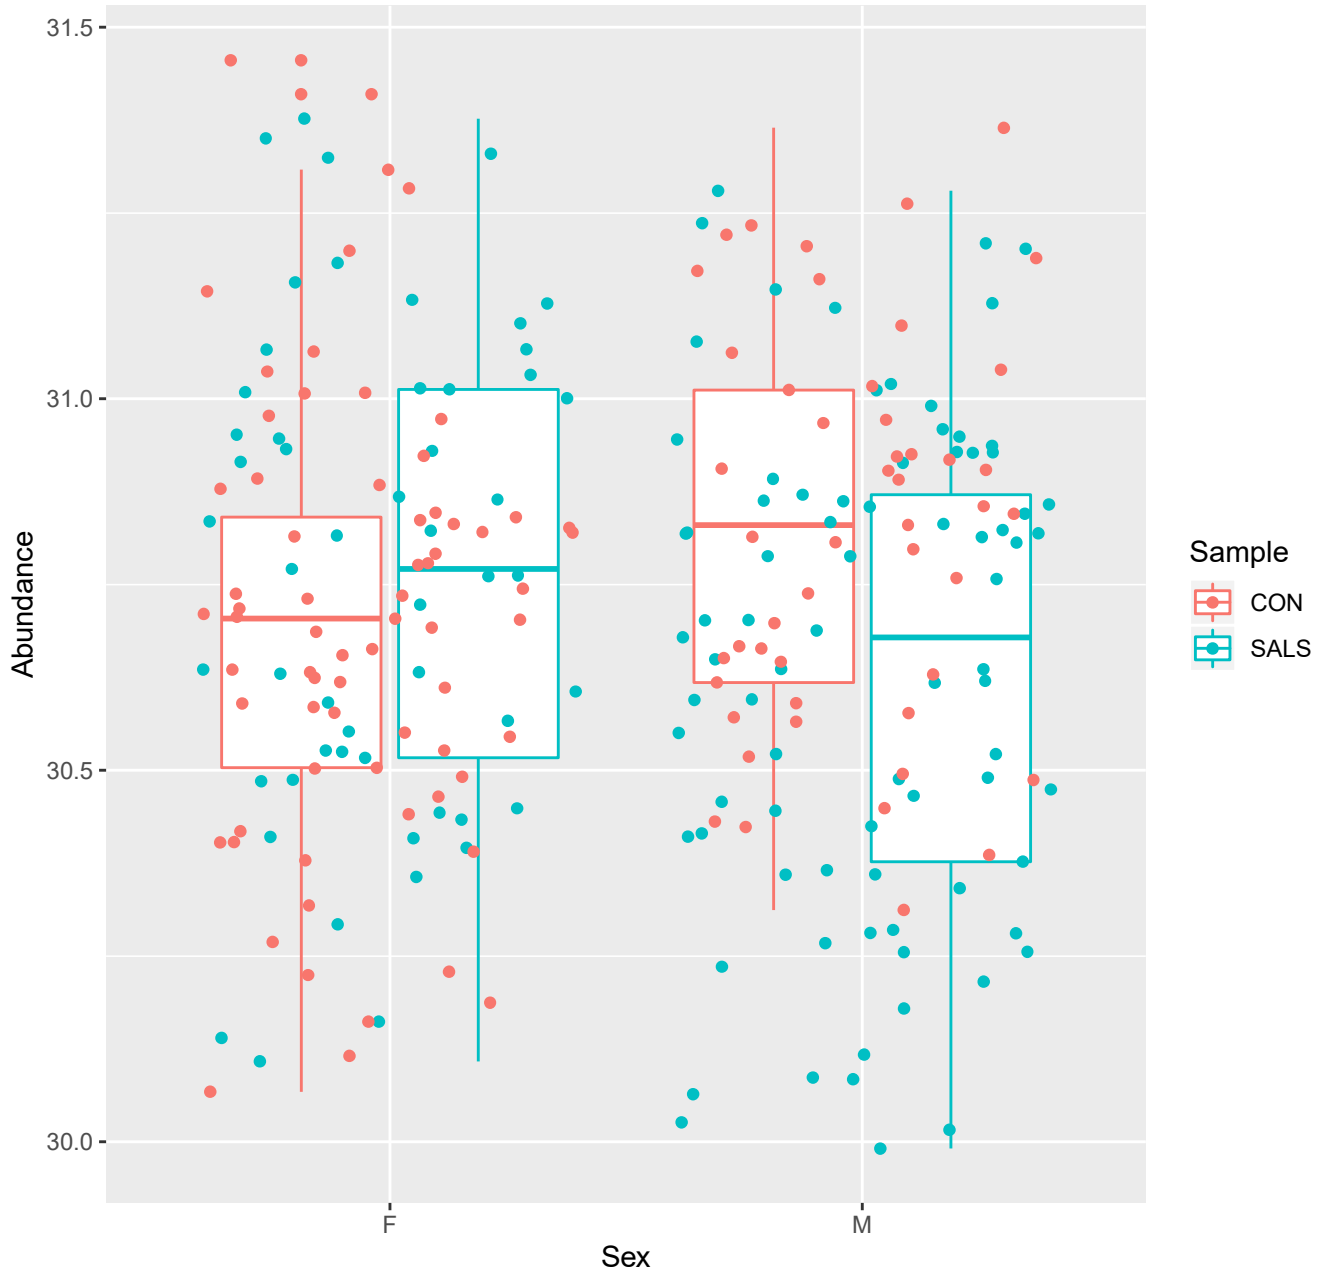

Proline pval= 0.0165 pvalf= 7e-04 pvalm= 0.8551

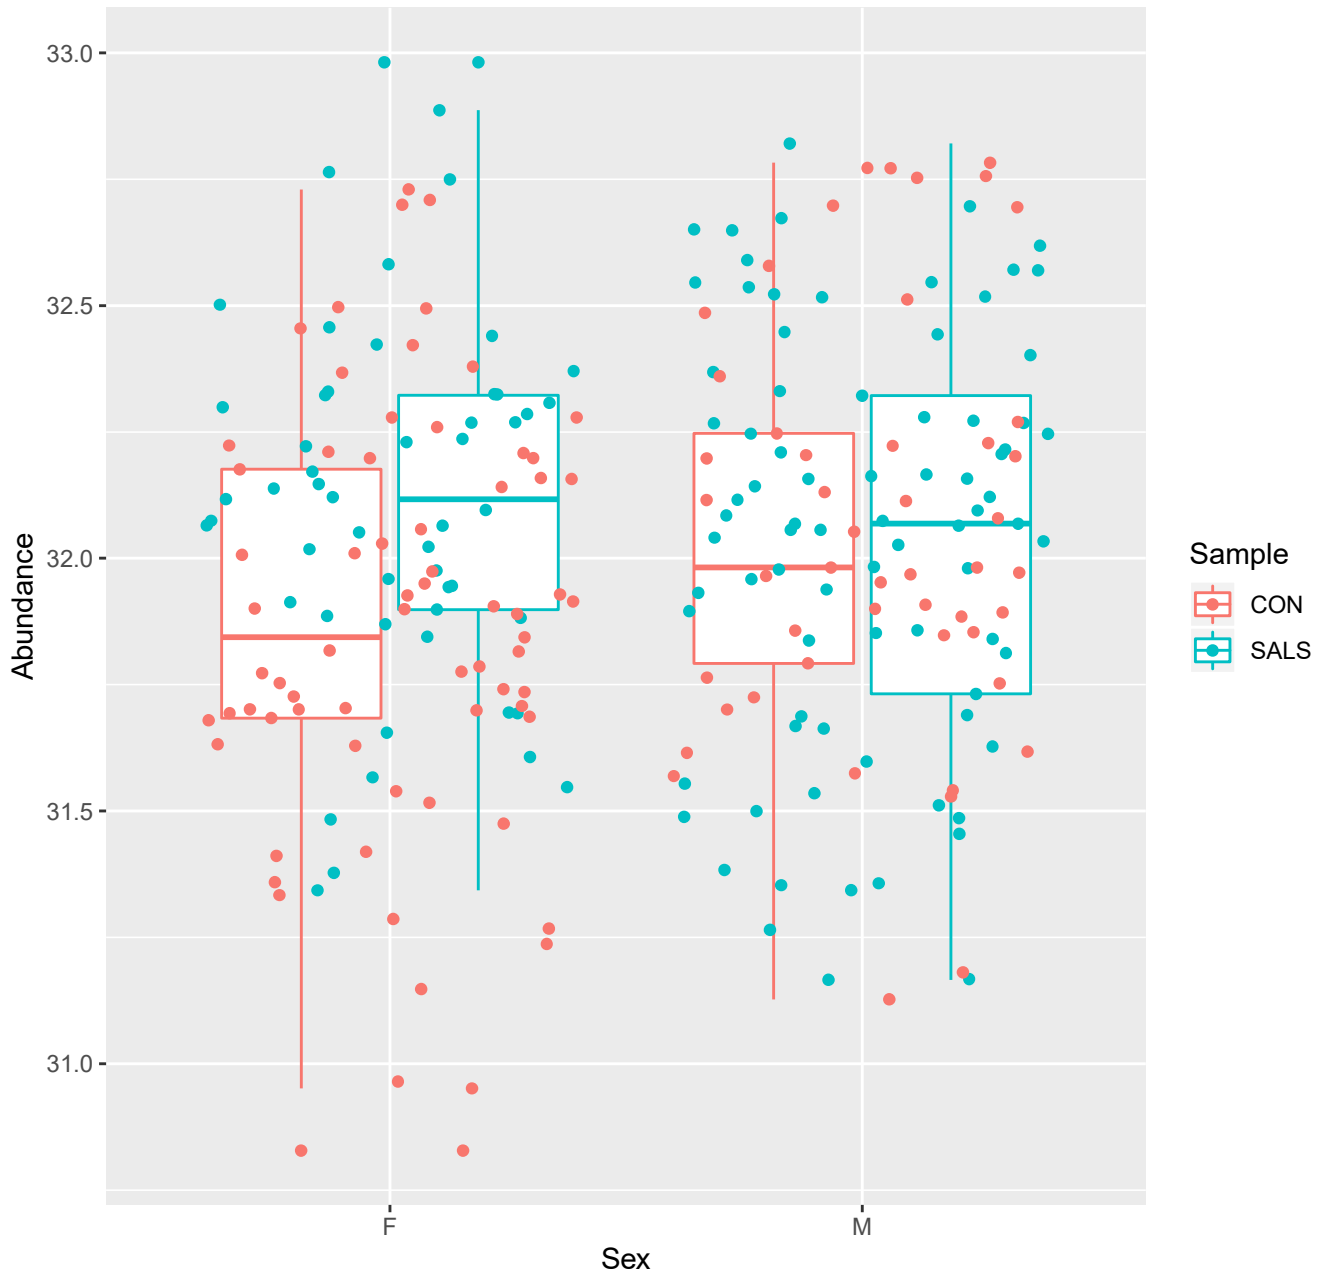

Serine pval= 0.0725 pvalf= 0.0166 pvalm= 0.4306

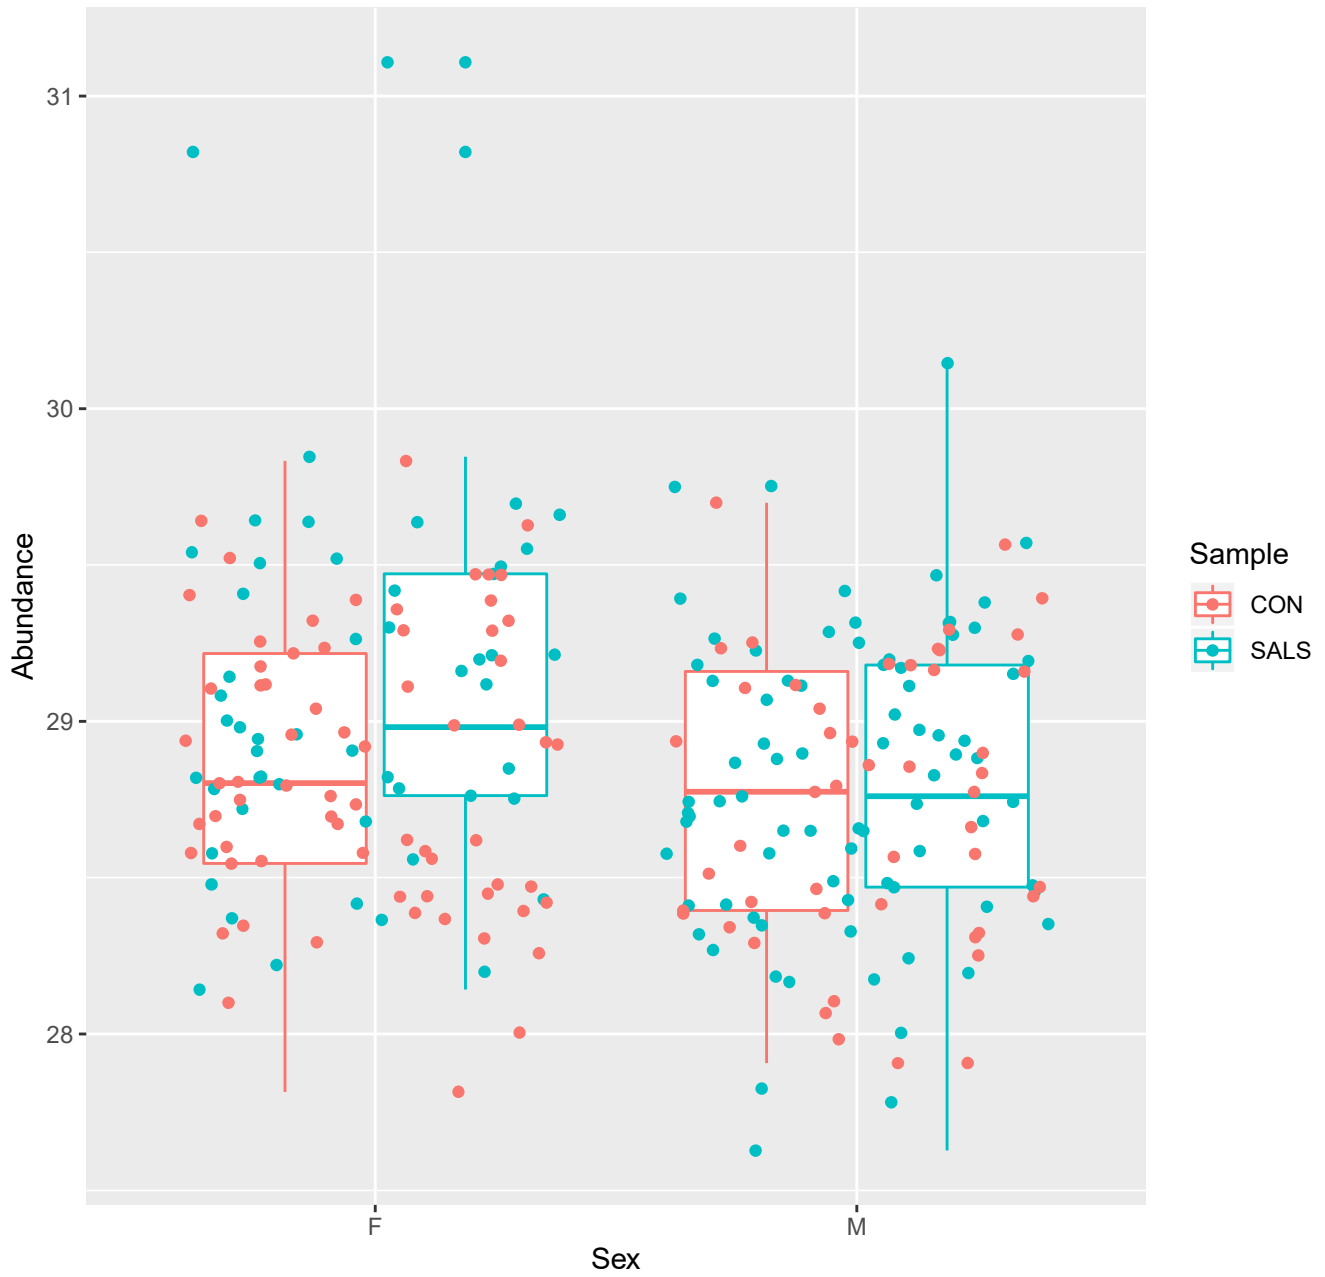



Threonine pval= 0.3322 pvalf= 0.4012 pvalm= 0.0407

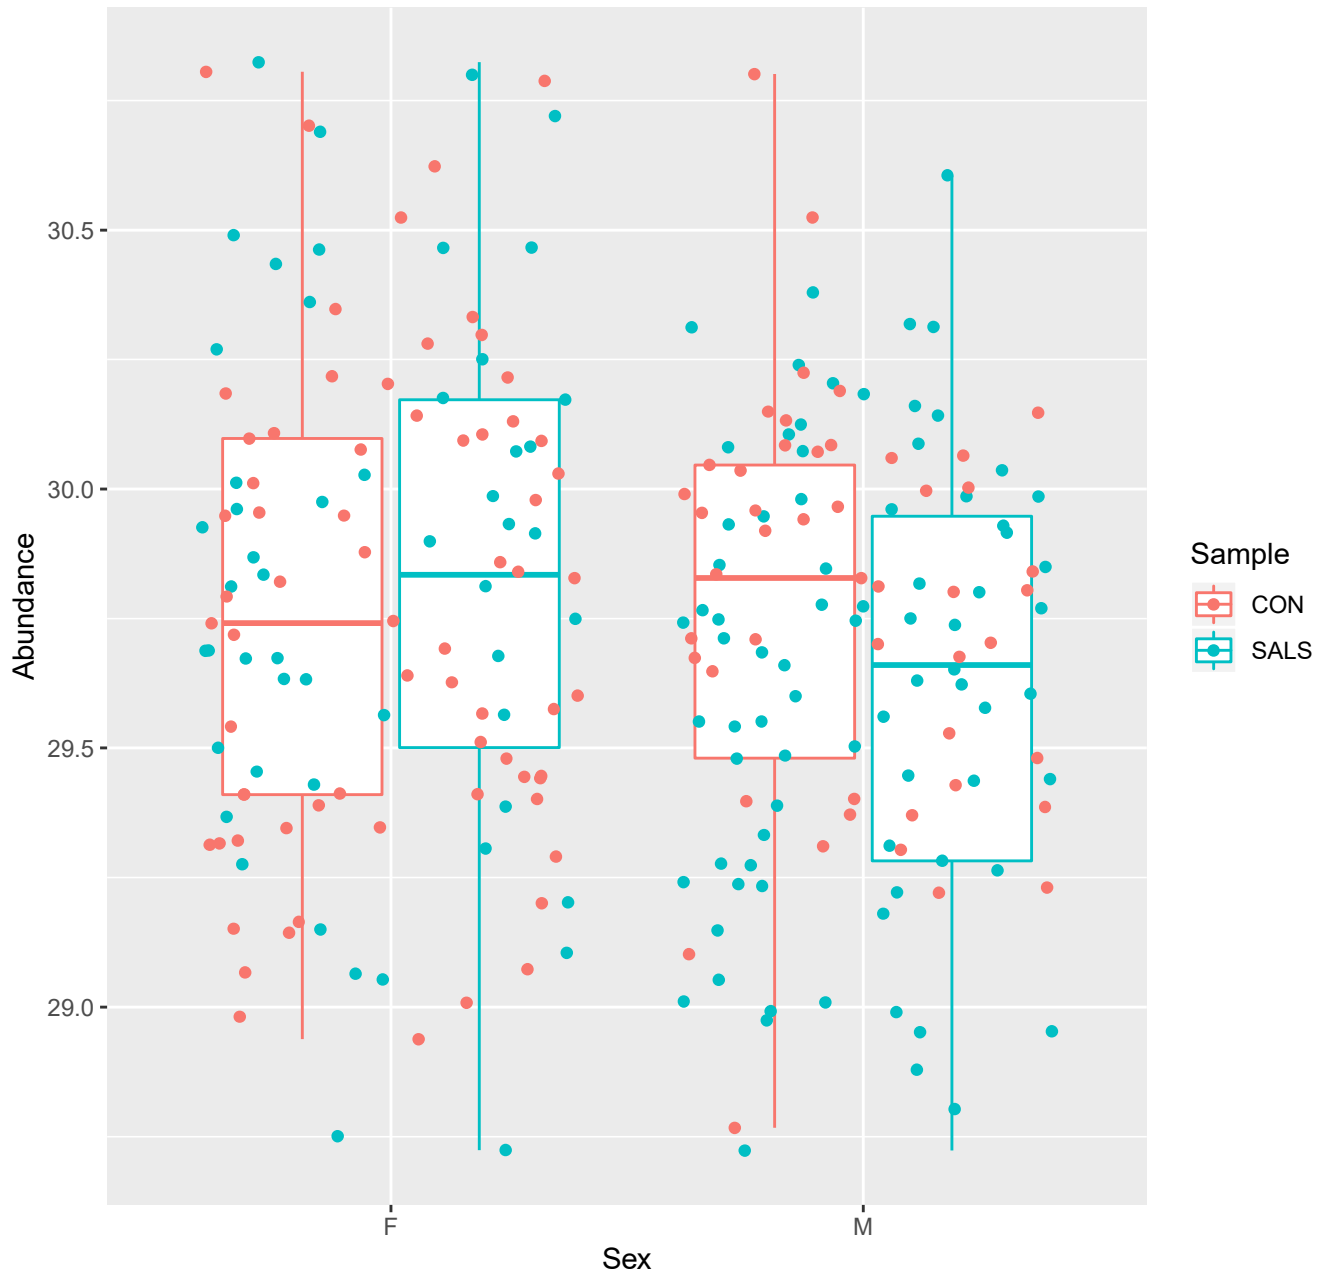

Tryptophan pval= 0.7327 pvalf= 0.3184 pvalm= 0.0672

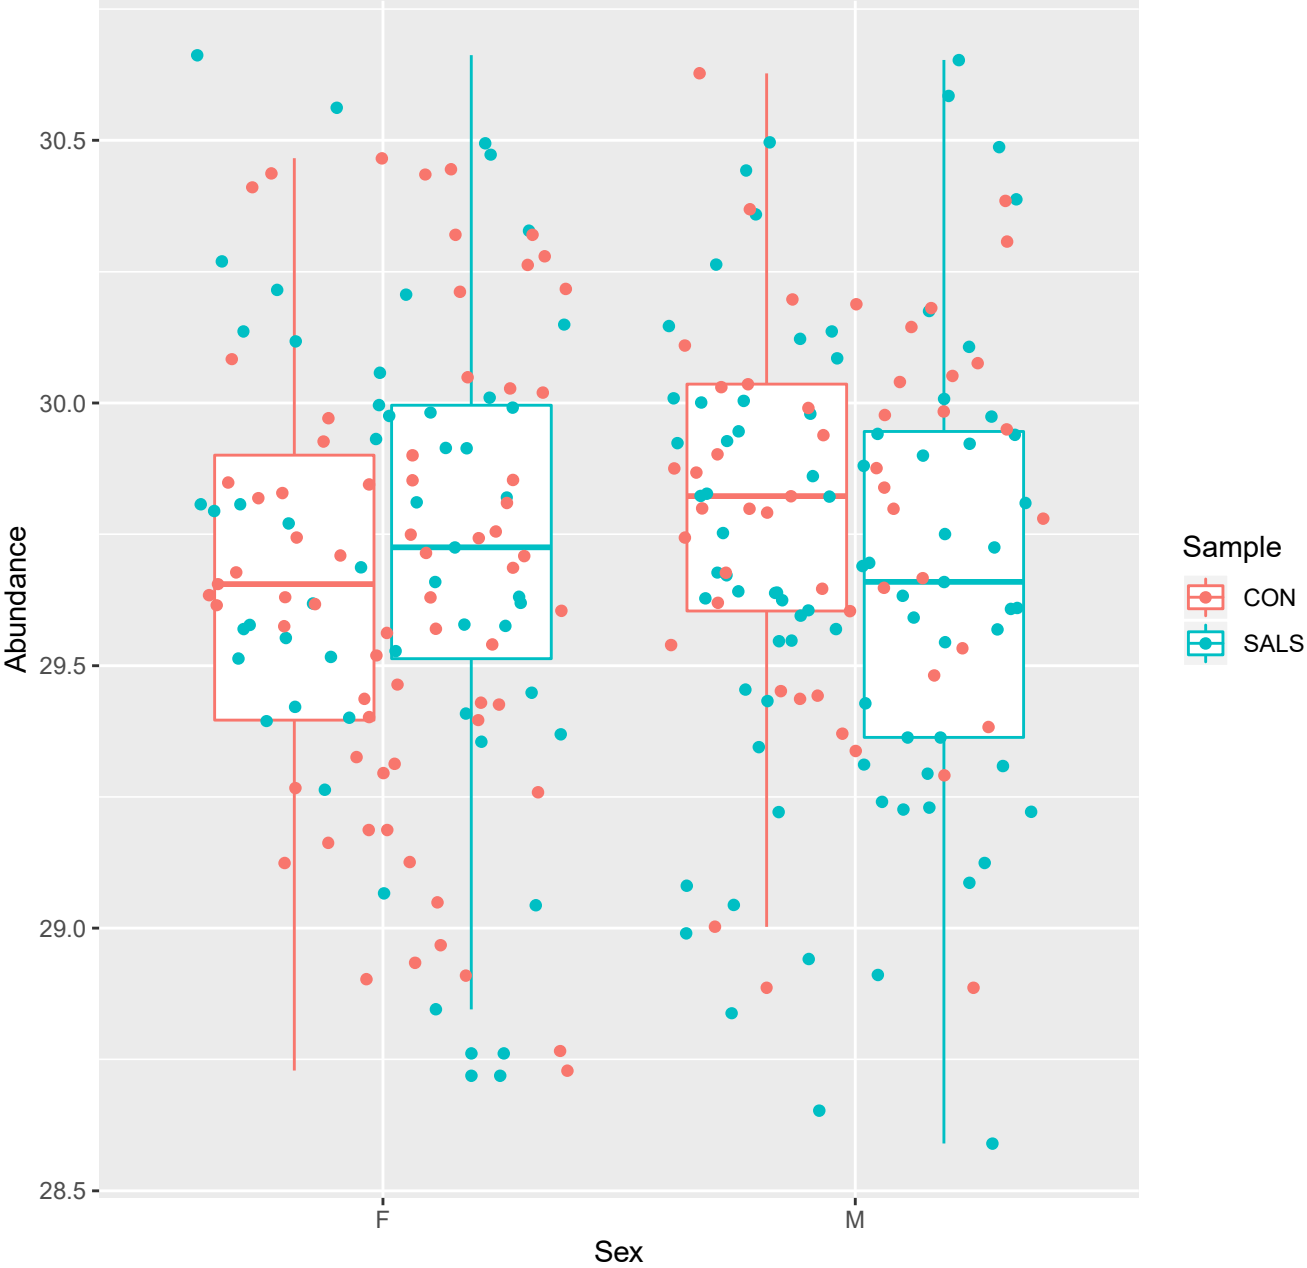

Tyrosine pval= 0.7076 pvalf= 0.1614 pvalm= 0.567

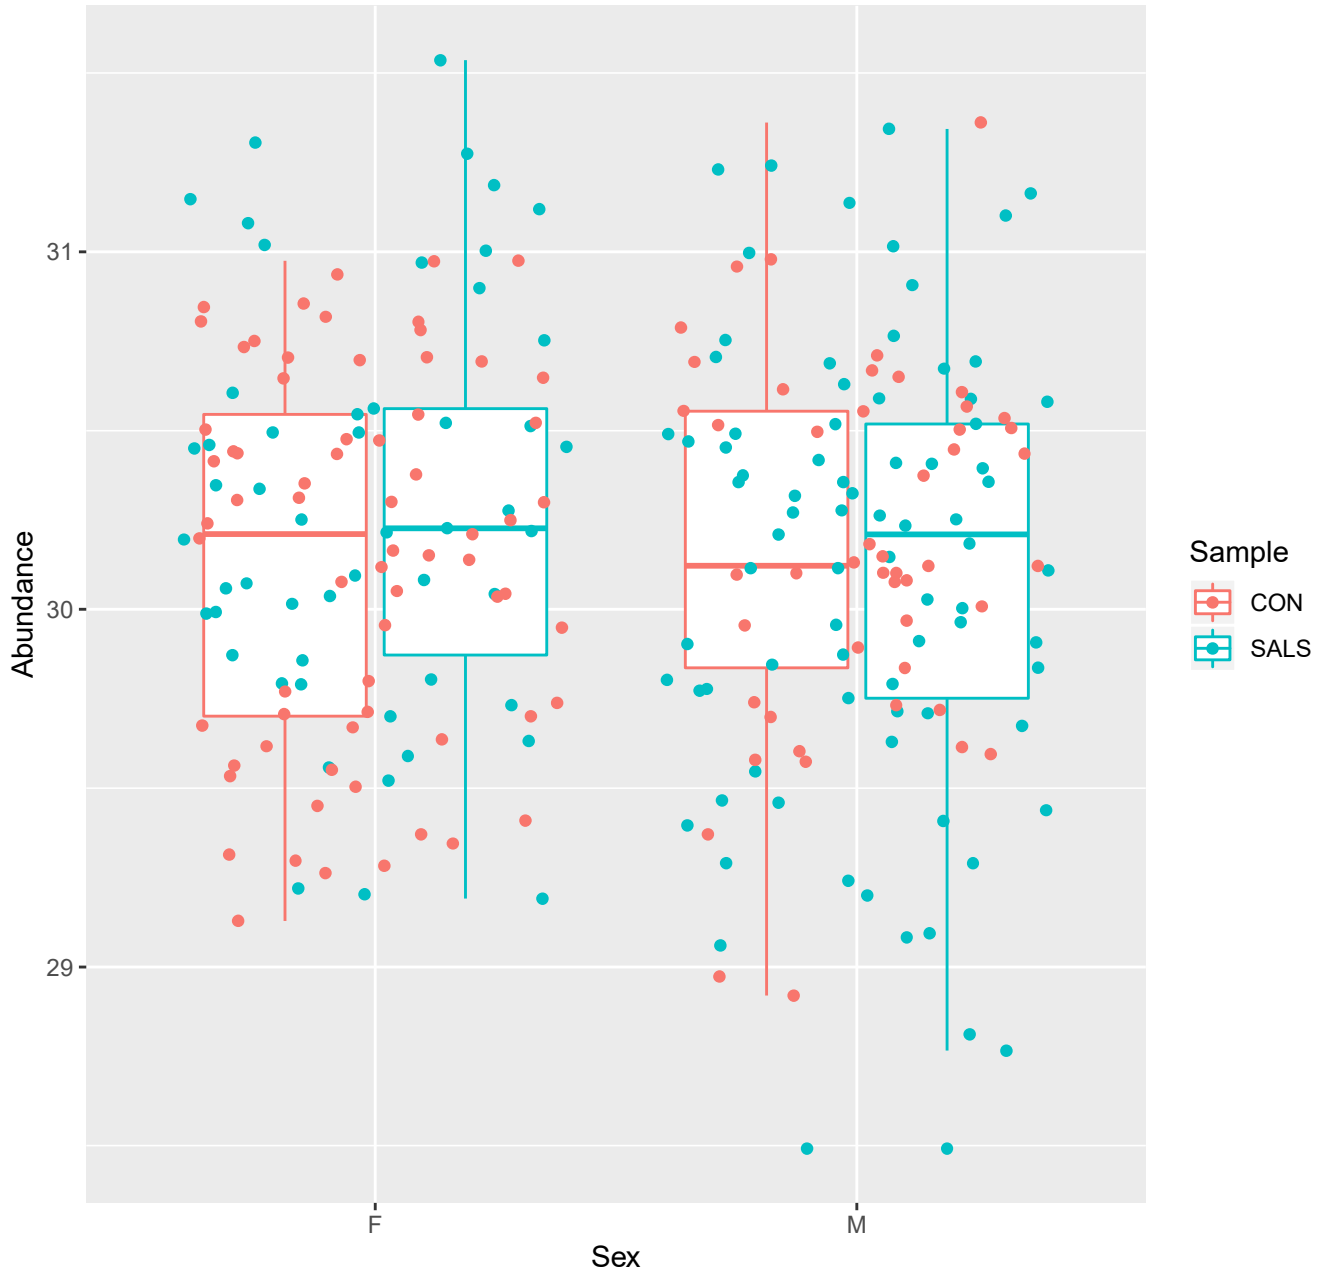

Valine pval= 0.7292 pvalf= 0.1568 pvalm= 0.1421

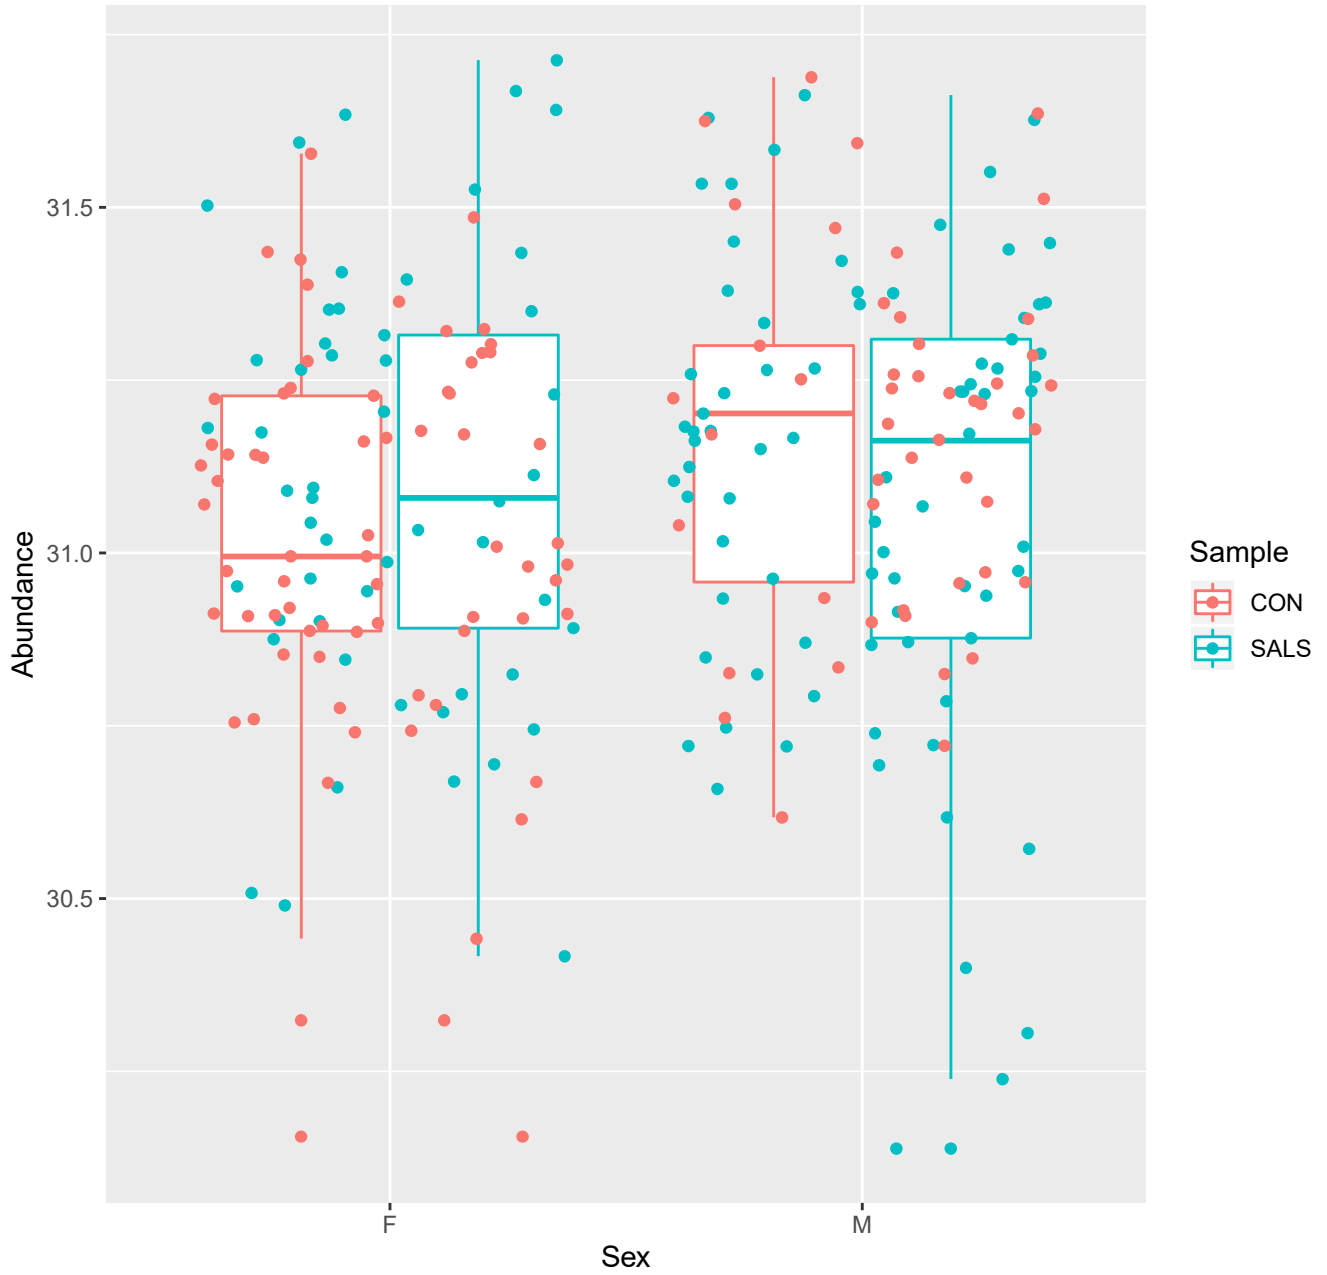

Choline pval= 0.7209 pvalf= 0.4728 pvalm= 0.6094

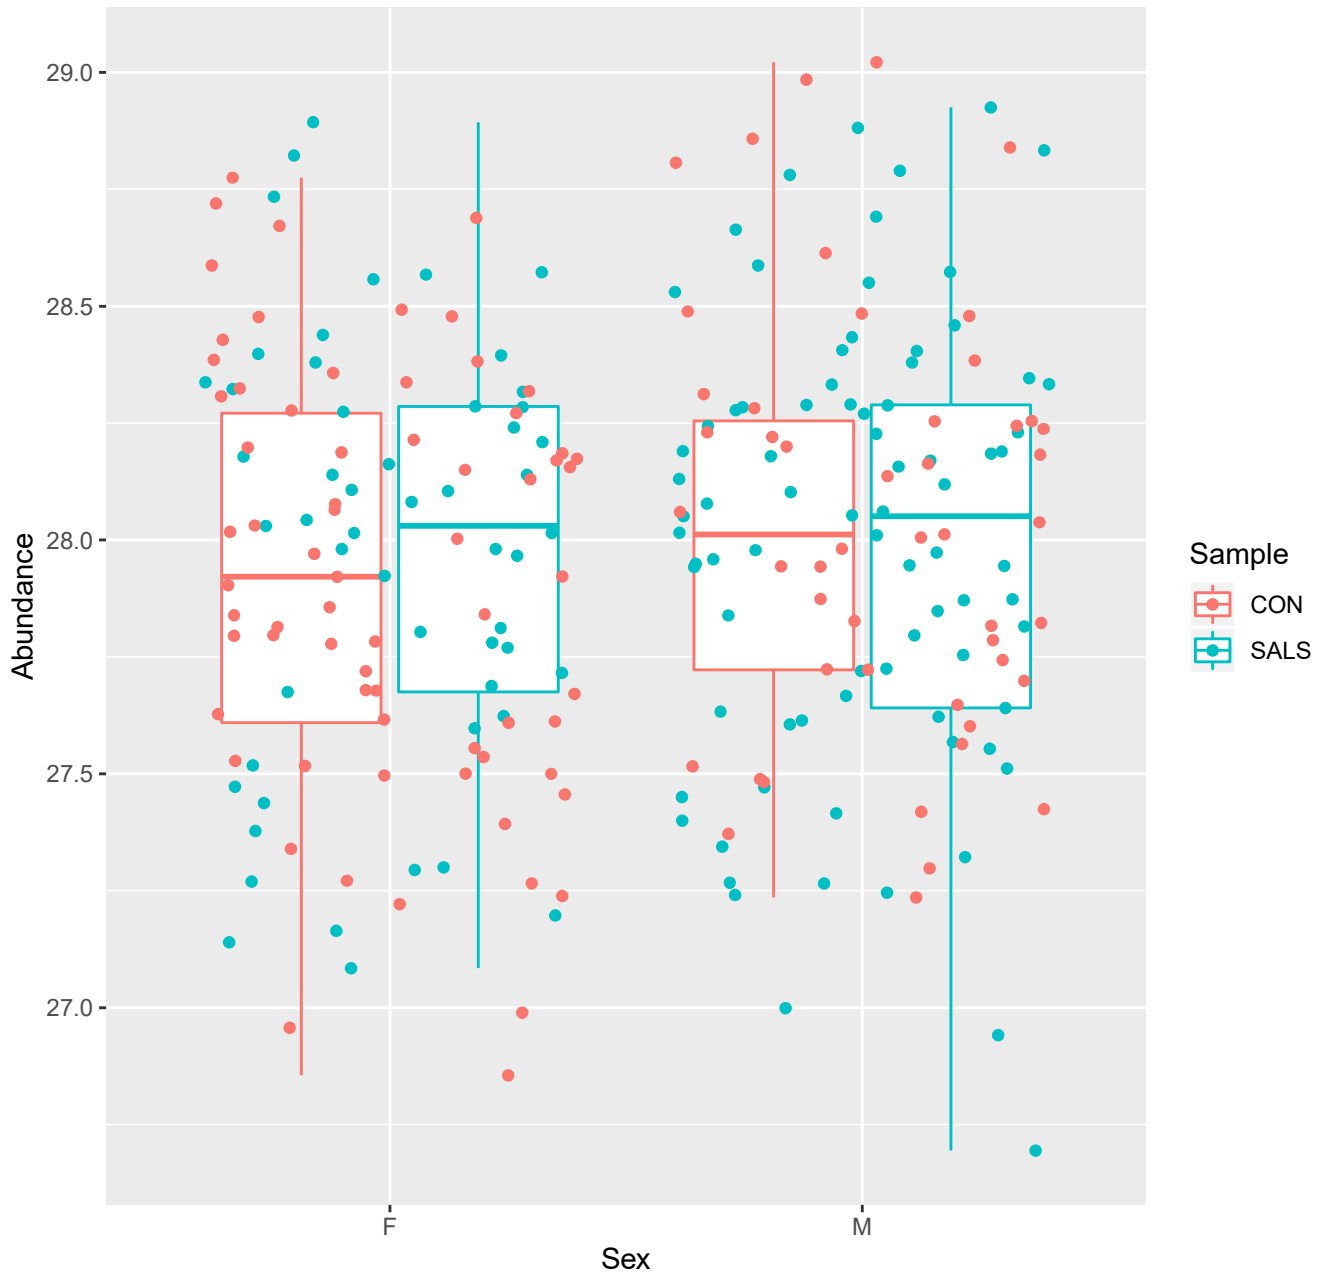

Betaine pval= 0.2843 pvalf= 0.3684 pvalm= 0.1262

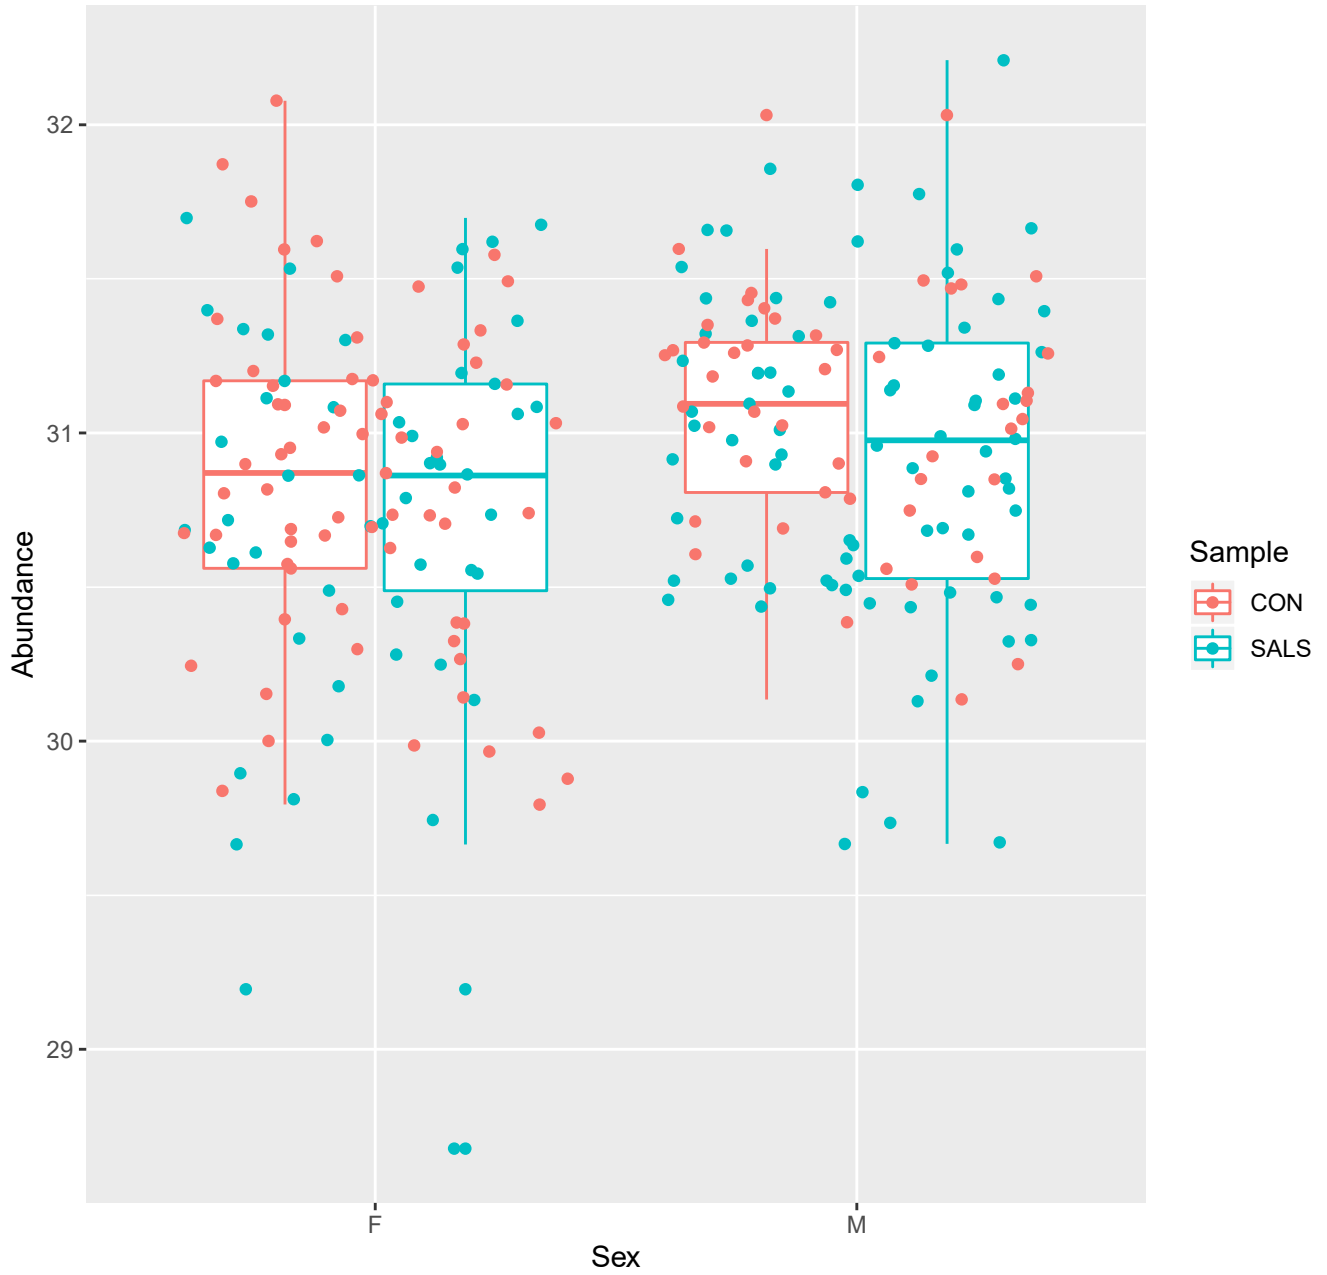

Creatinine pval= 0 pvalf= 0 pvalm= 0

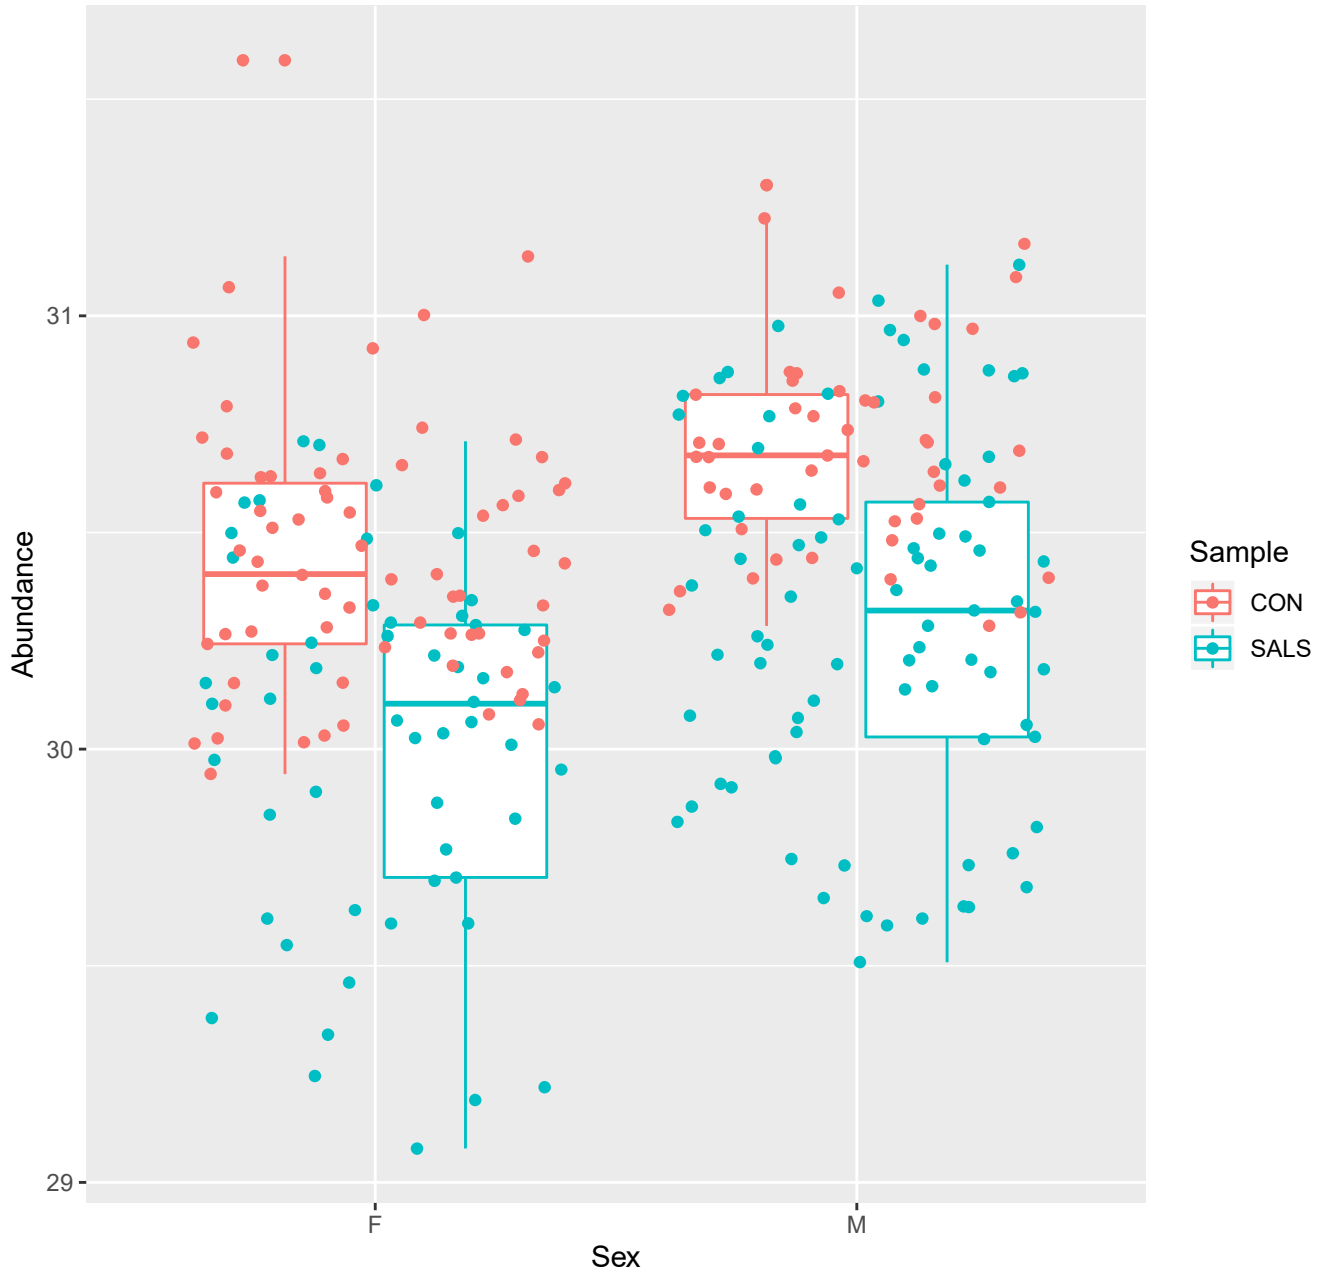

Creatine pval= 0 pvalf= 0 pvalm= 0

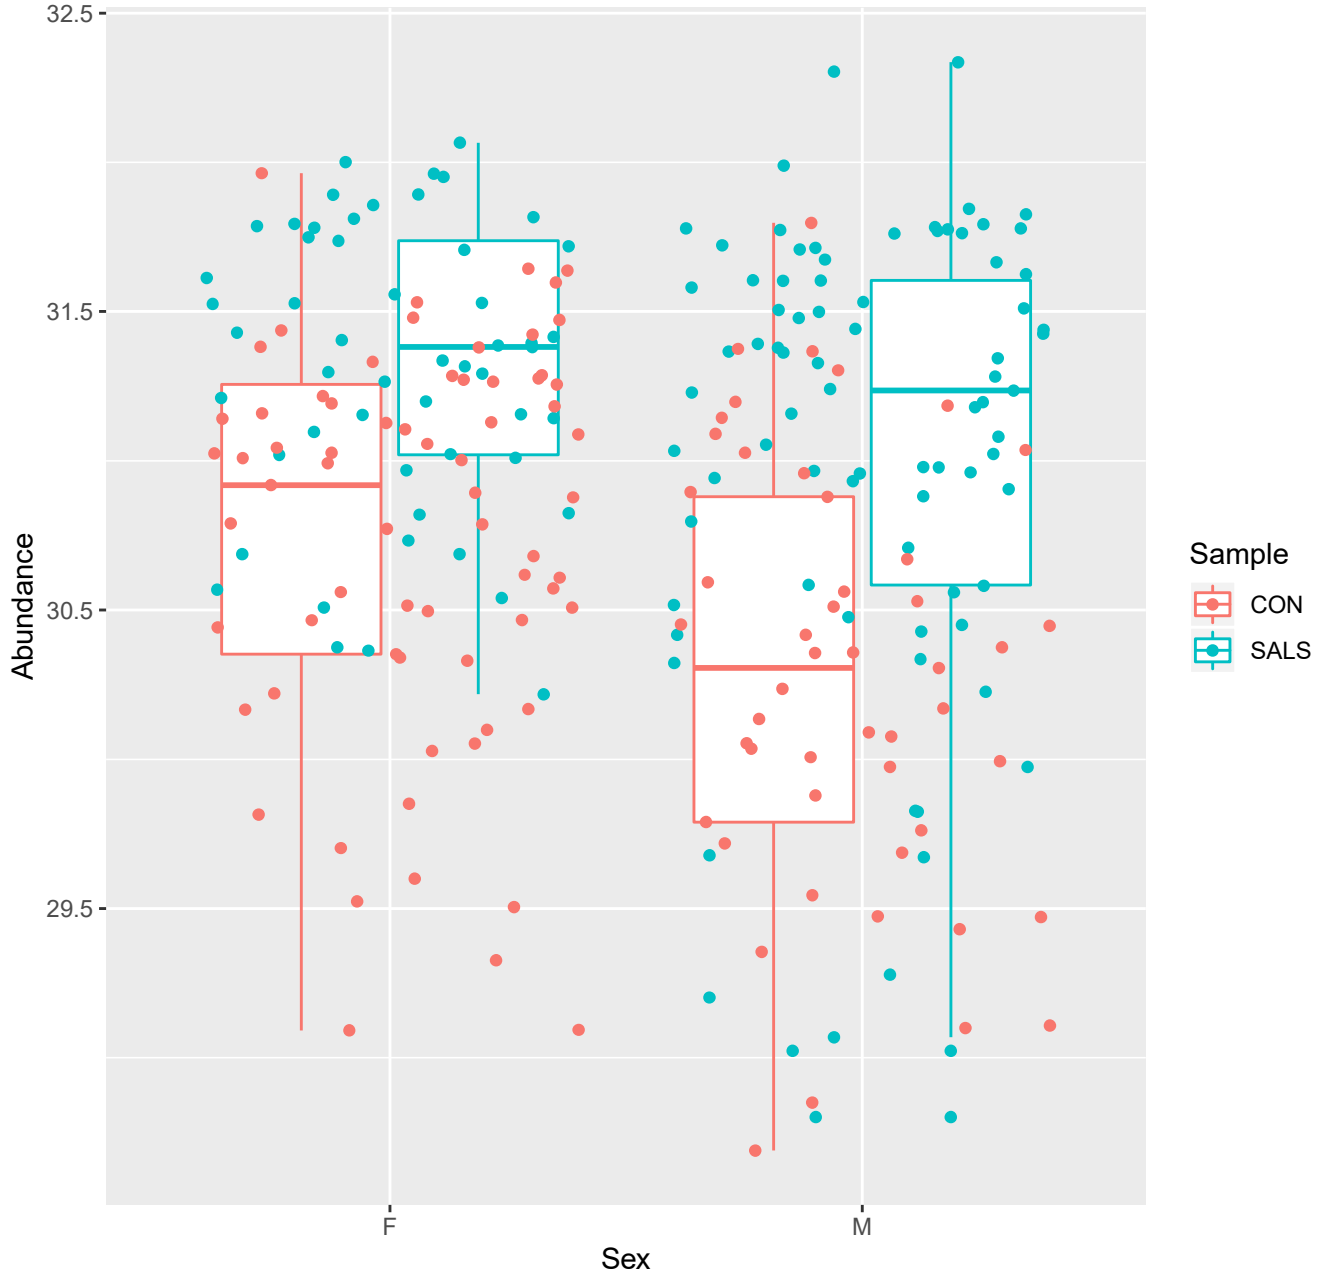



Carnitine pval= 0.9391 pvalf= 0.9534 pvalm= 0.3861

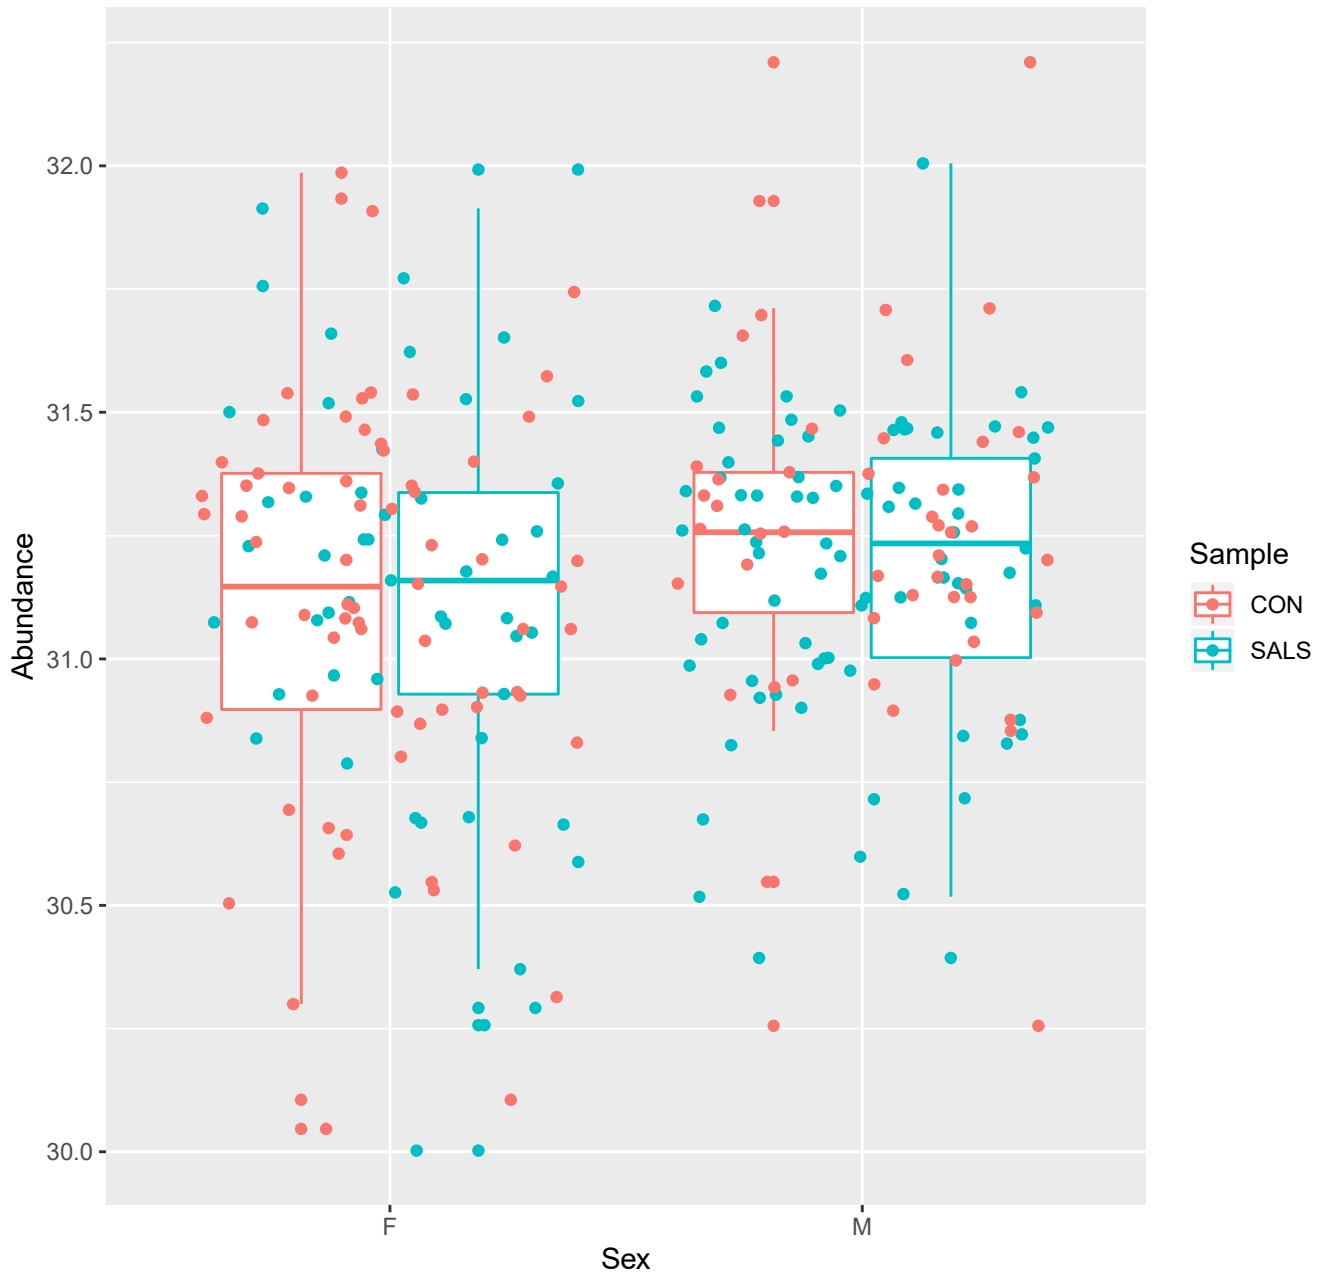

Methylhistidine pval= 5e-04 pvalf= 0.0503 pvalm= 5e-04

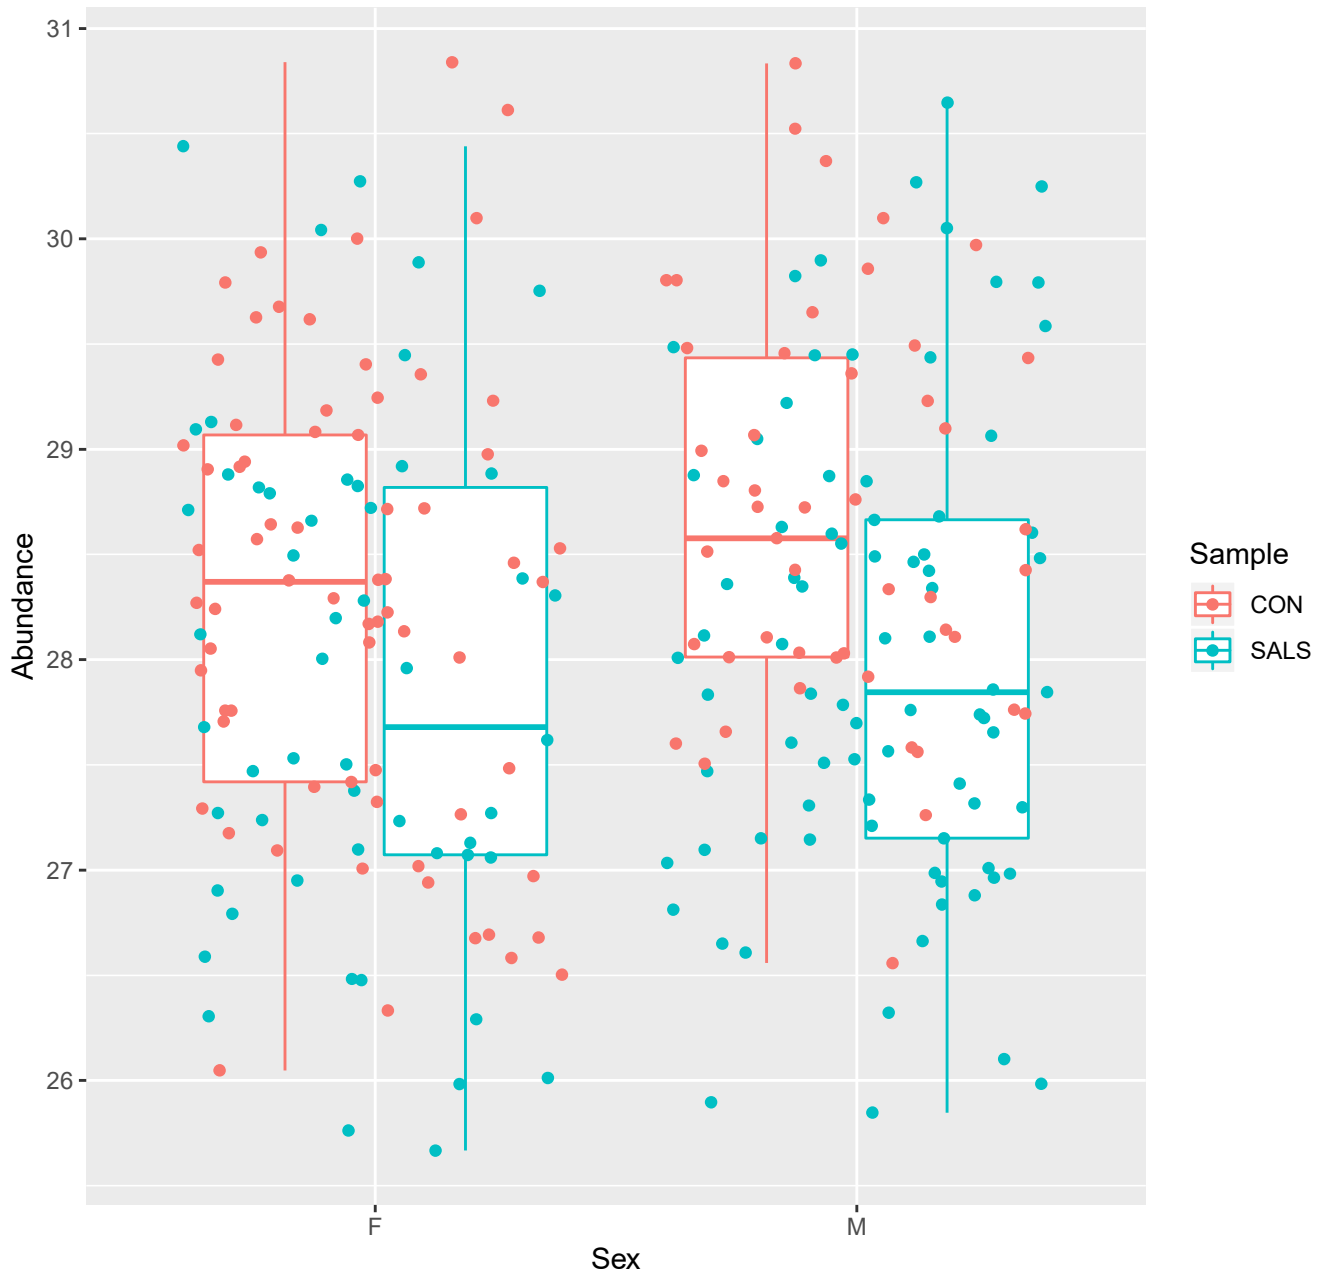

Citrulline pval= 0.7191 pvalf= 0.2989 pvalm= 0.7312

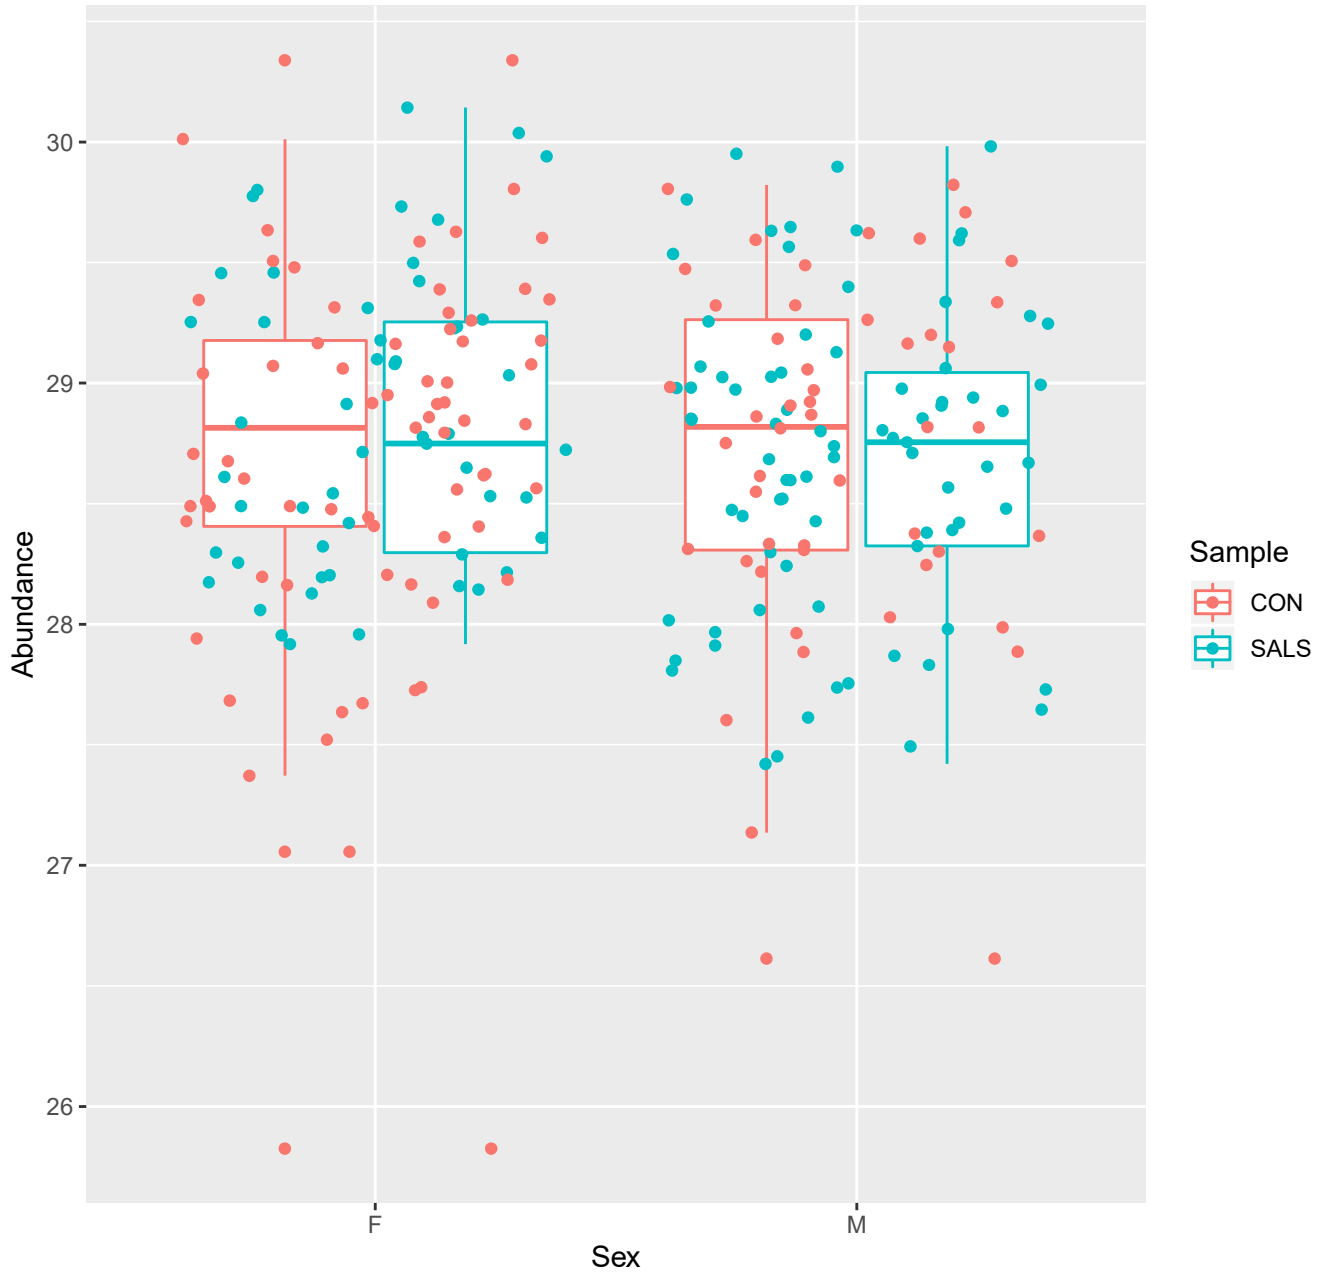

Dihydrothymine pval= 3e-04 pvalf= 0.0018 pvalm= 0

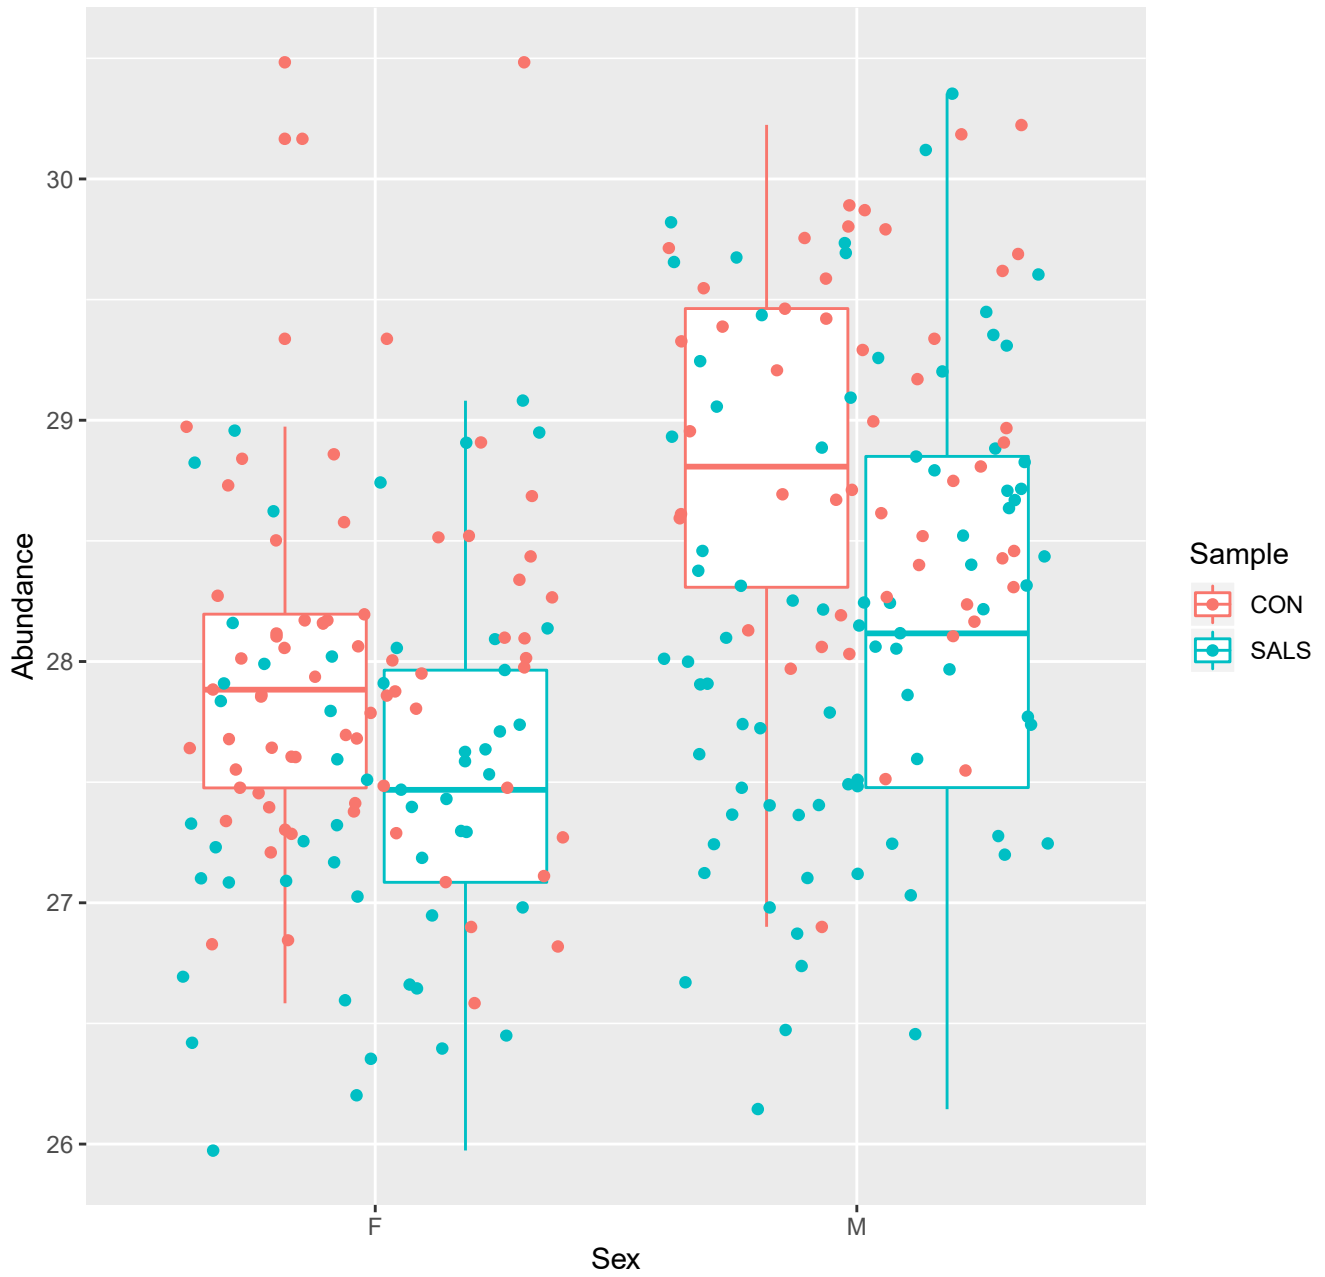

Acetylcarnitine pval= 0.0773 pvalf= 0.007 pvalm= 0.965

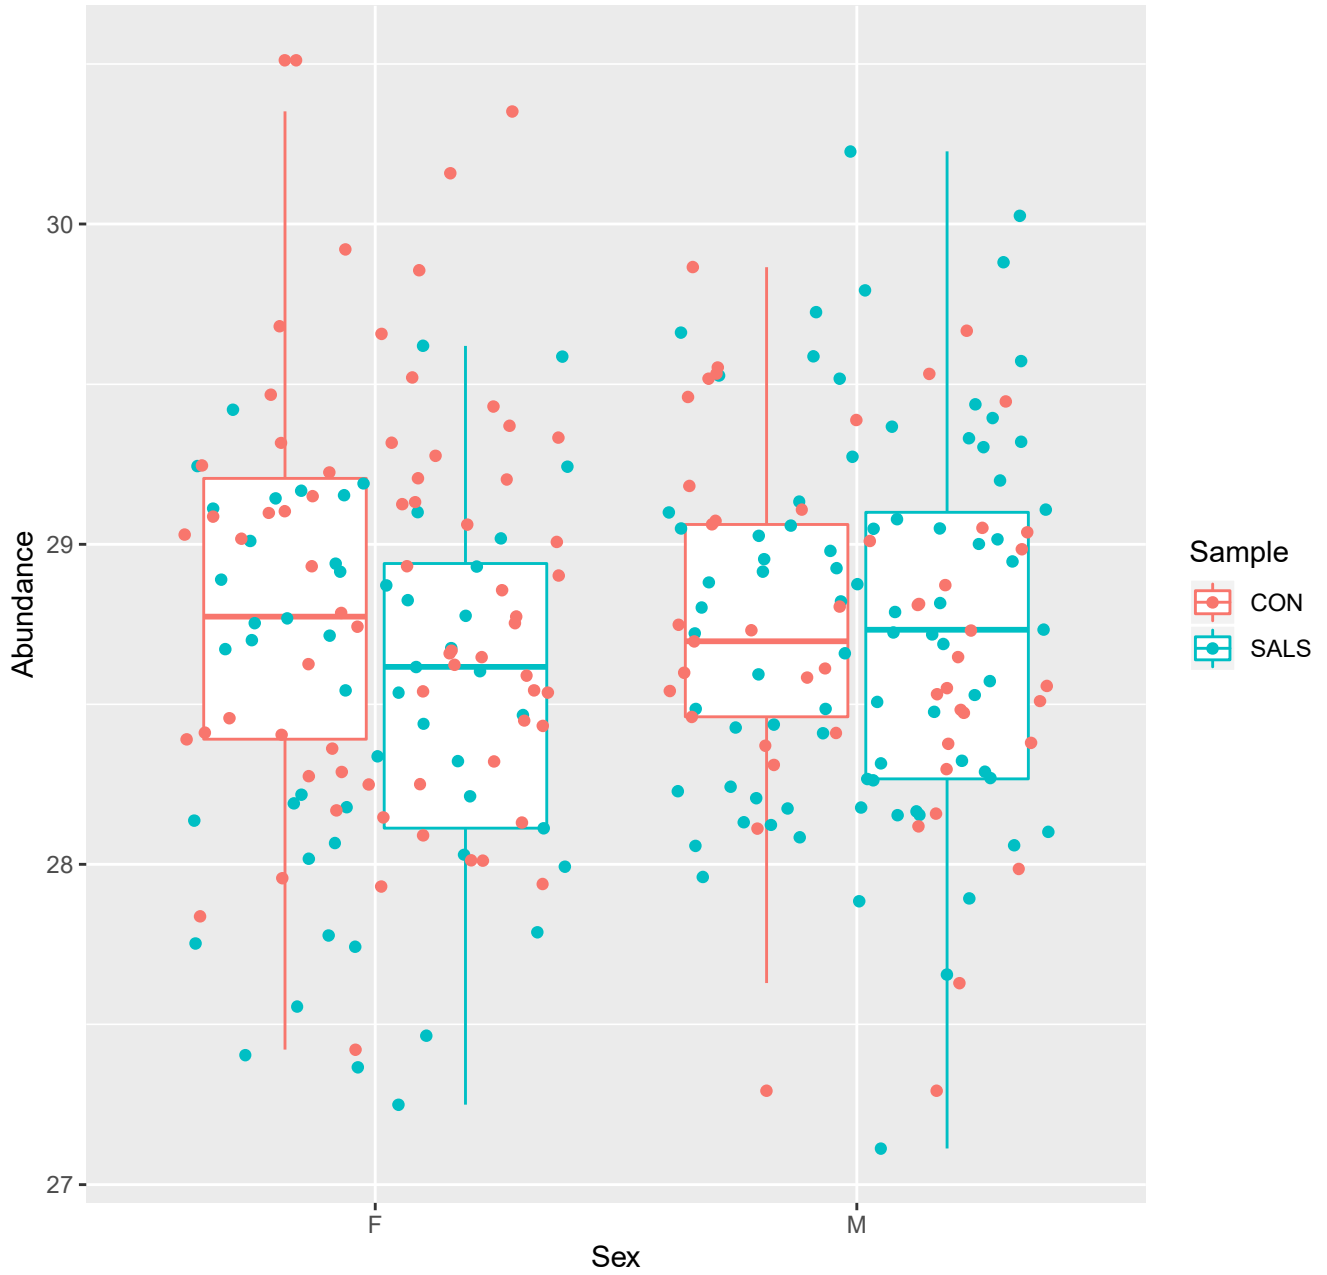

Pyroglutamic.Acid pval= 0.821 pvalf= 0.7791 pvalm= 0.8935

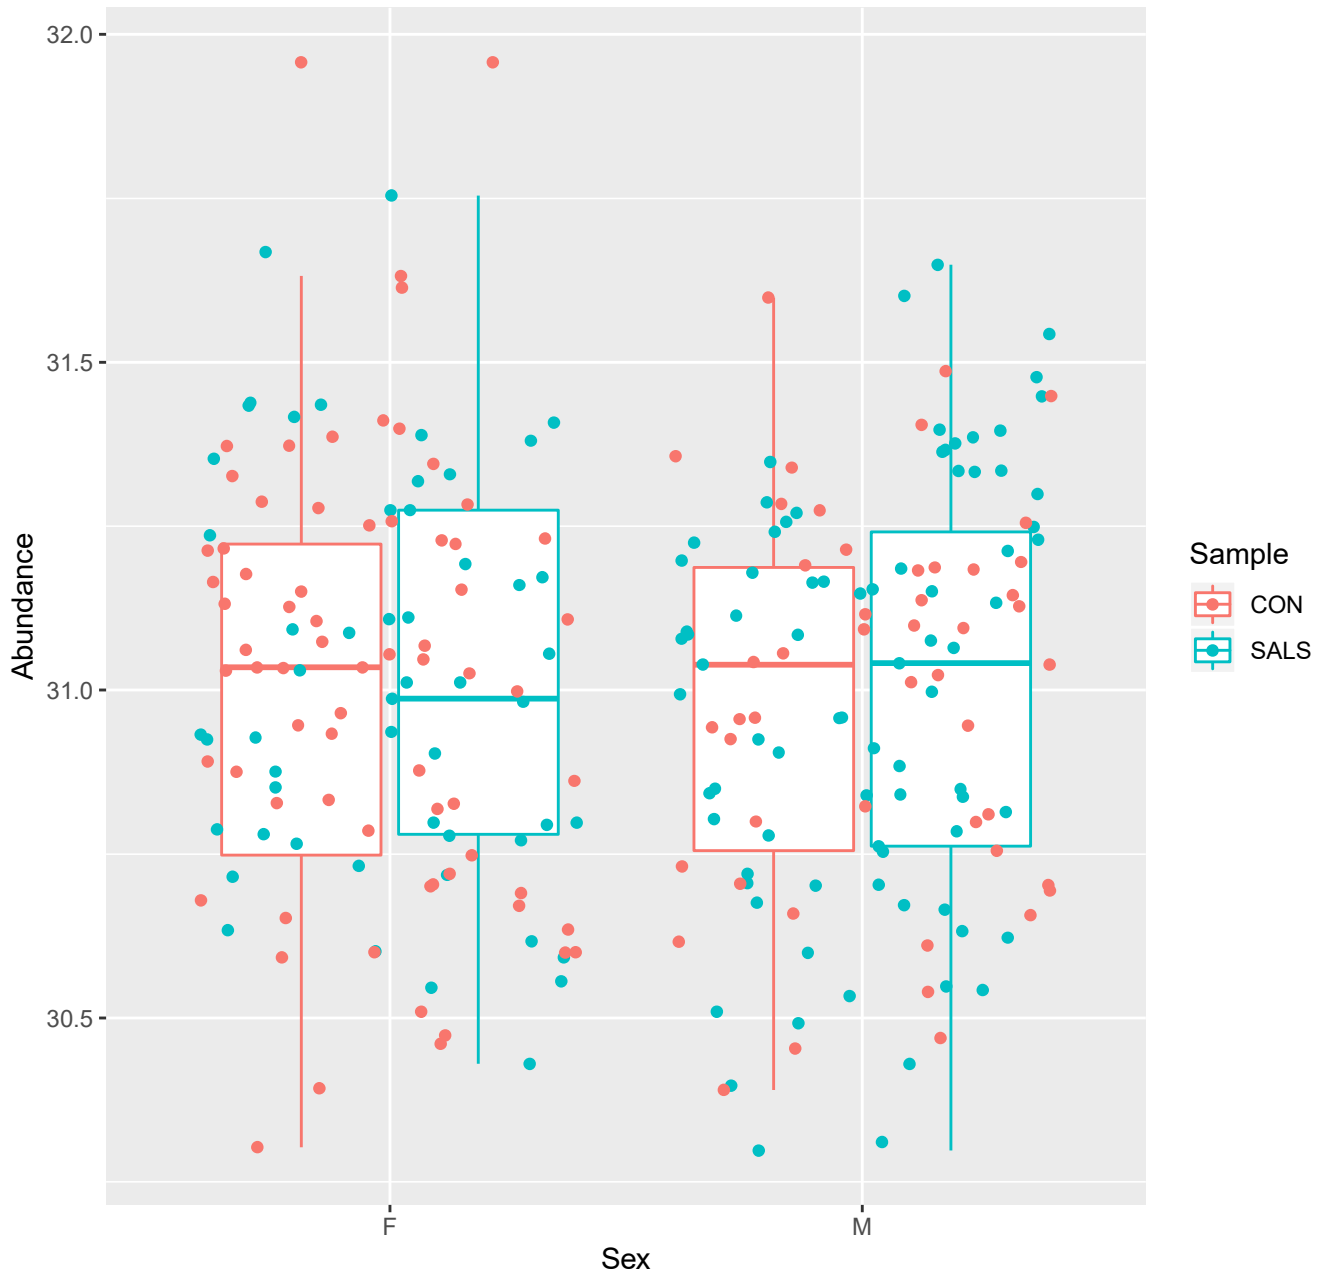

Stachydrine pval= 0.0234 pvalf= 7e-04 pvalm= 0.8235

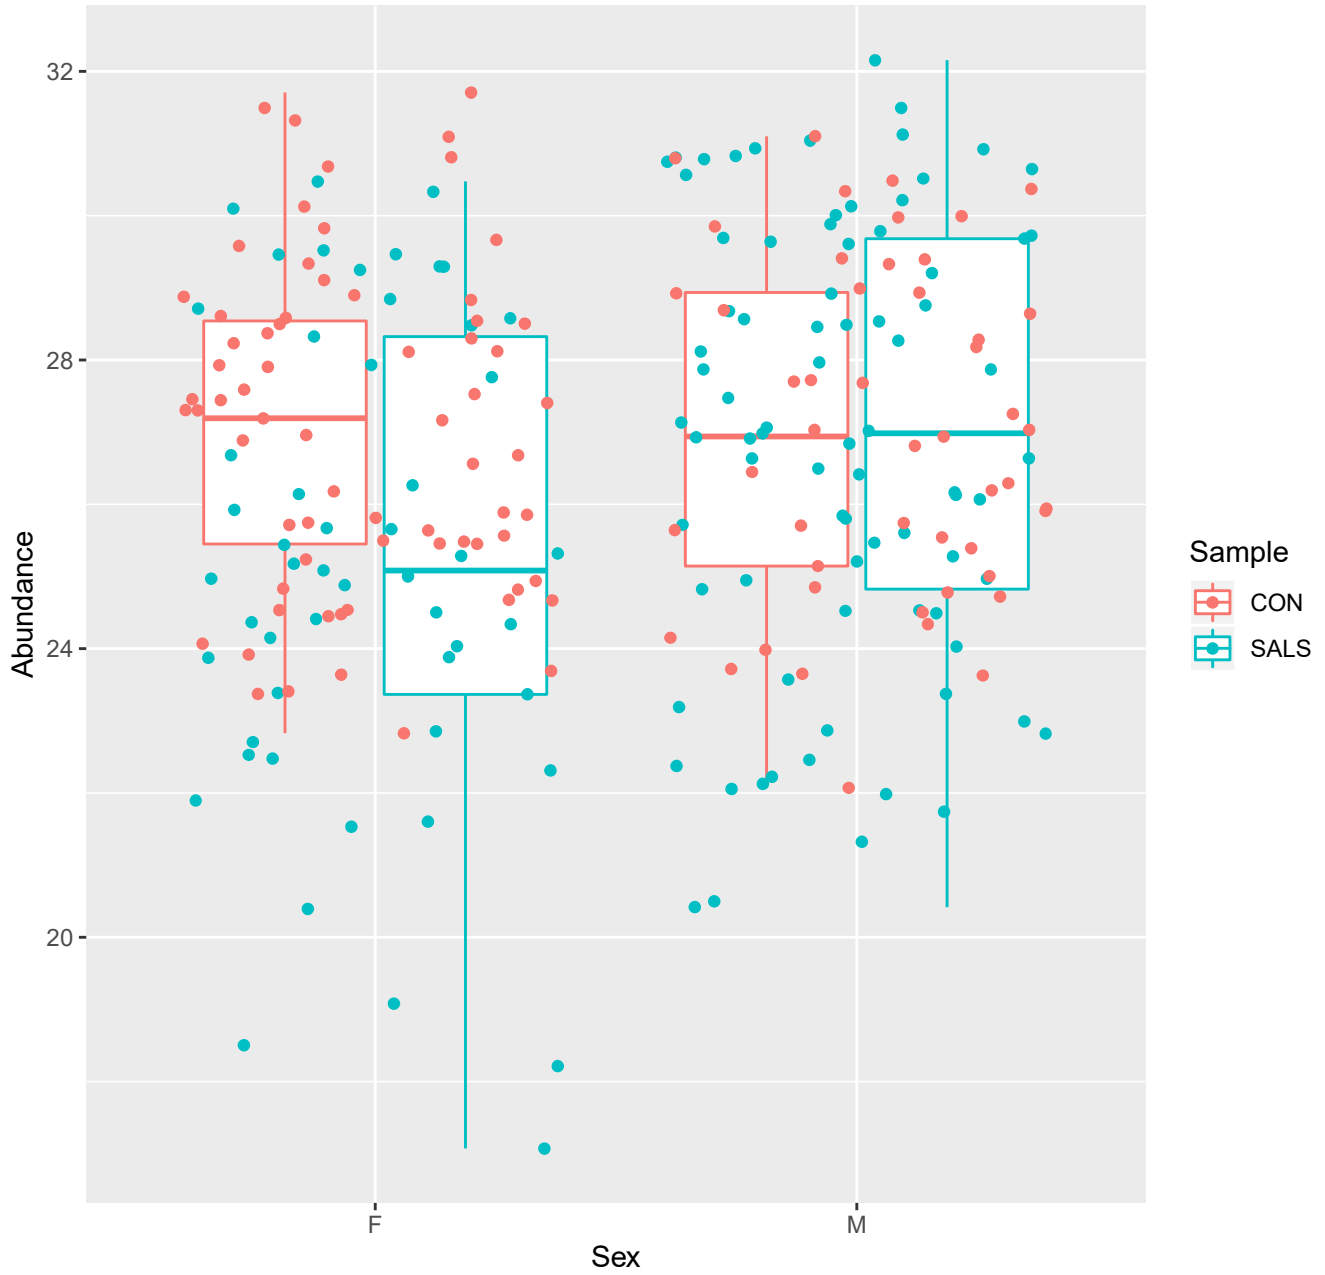

Hydroxyproline pval= 0.8249 pvalf= 0.286 pvalm= 0.2821

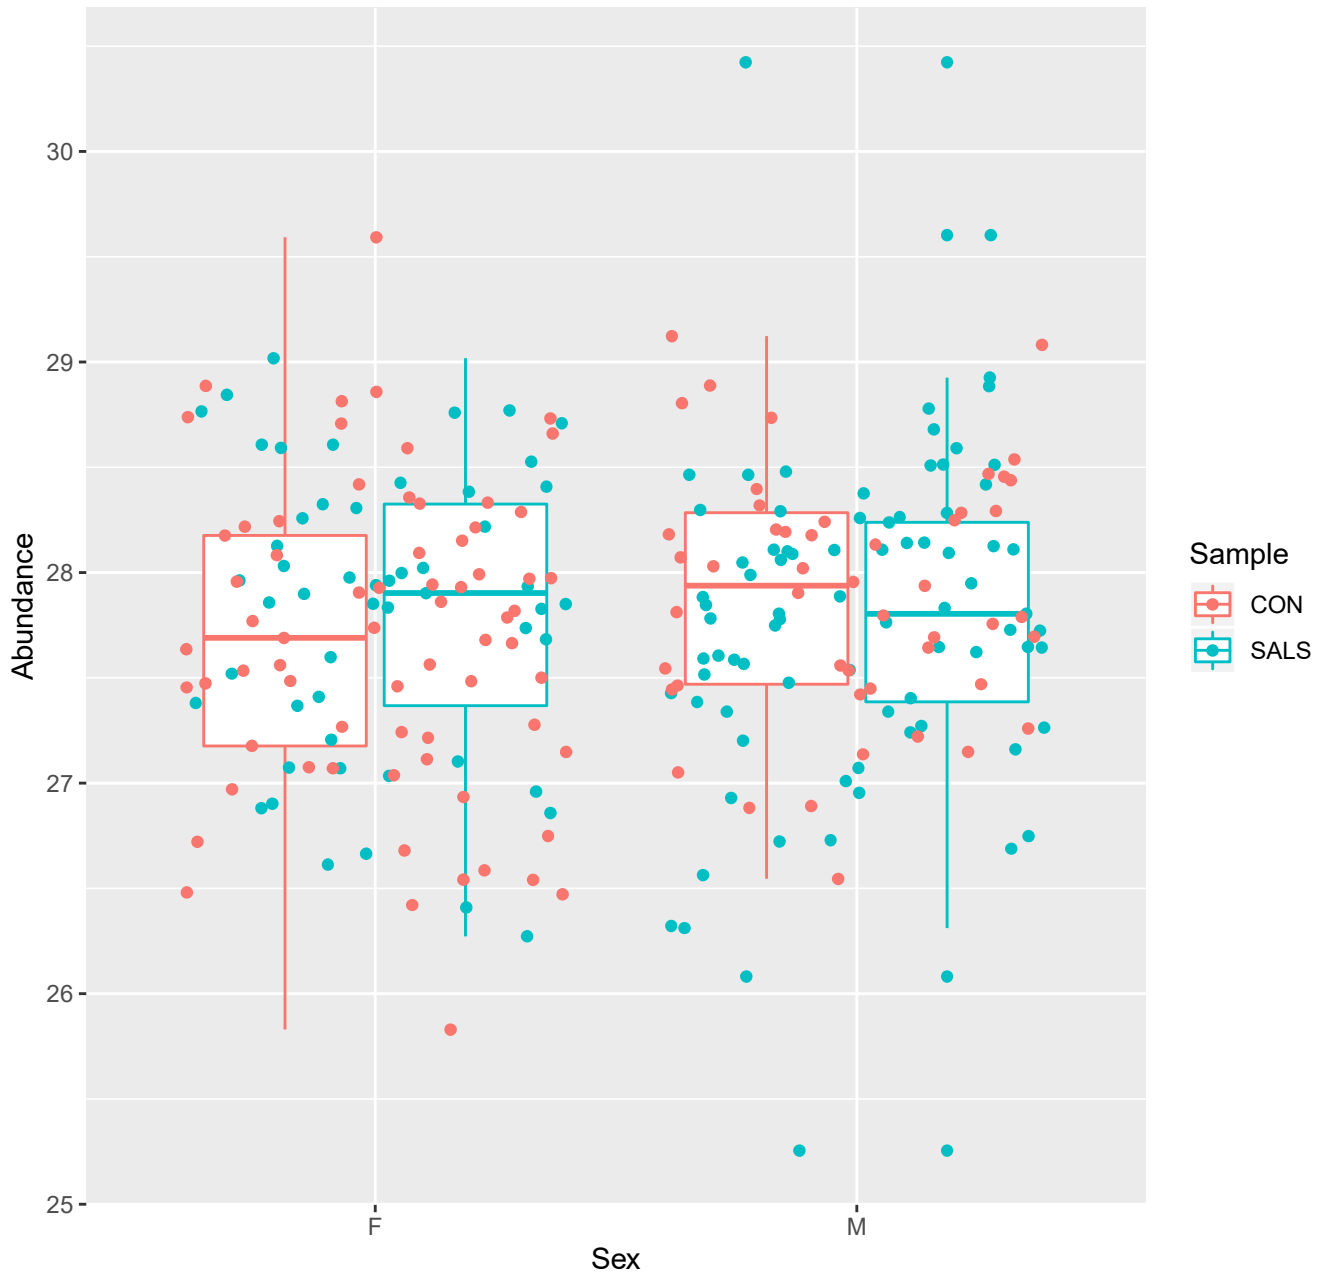



X130.0869.m.z pval= 0.7214 pvalf= 0.1483 pvalm= 0.2678

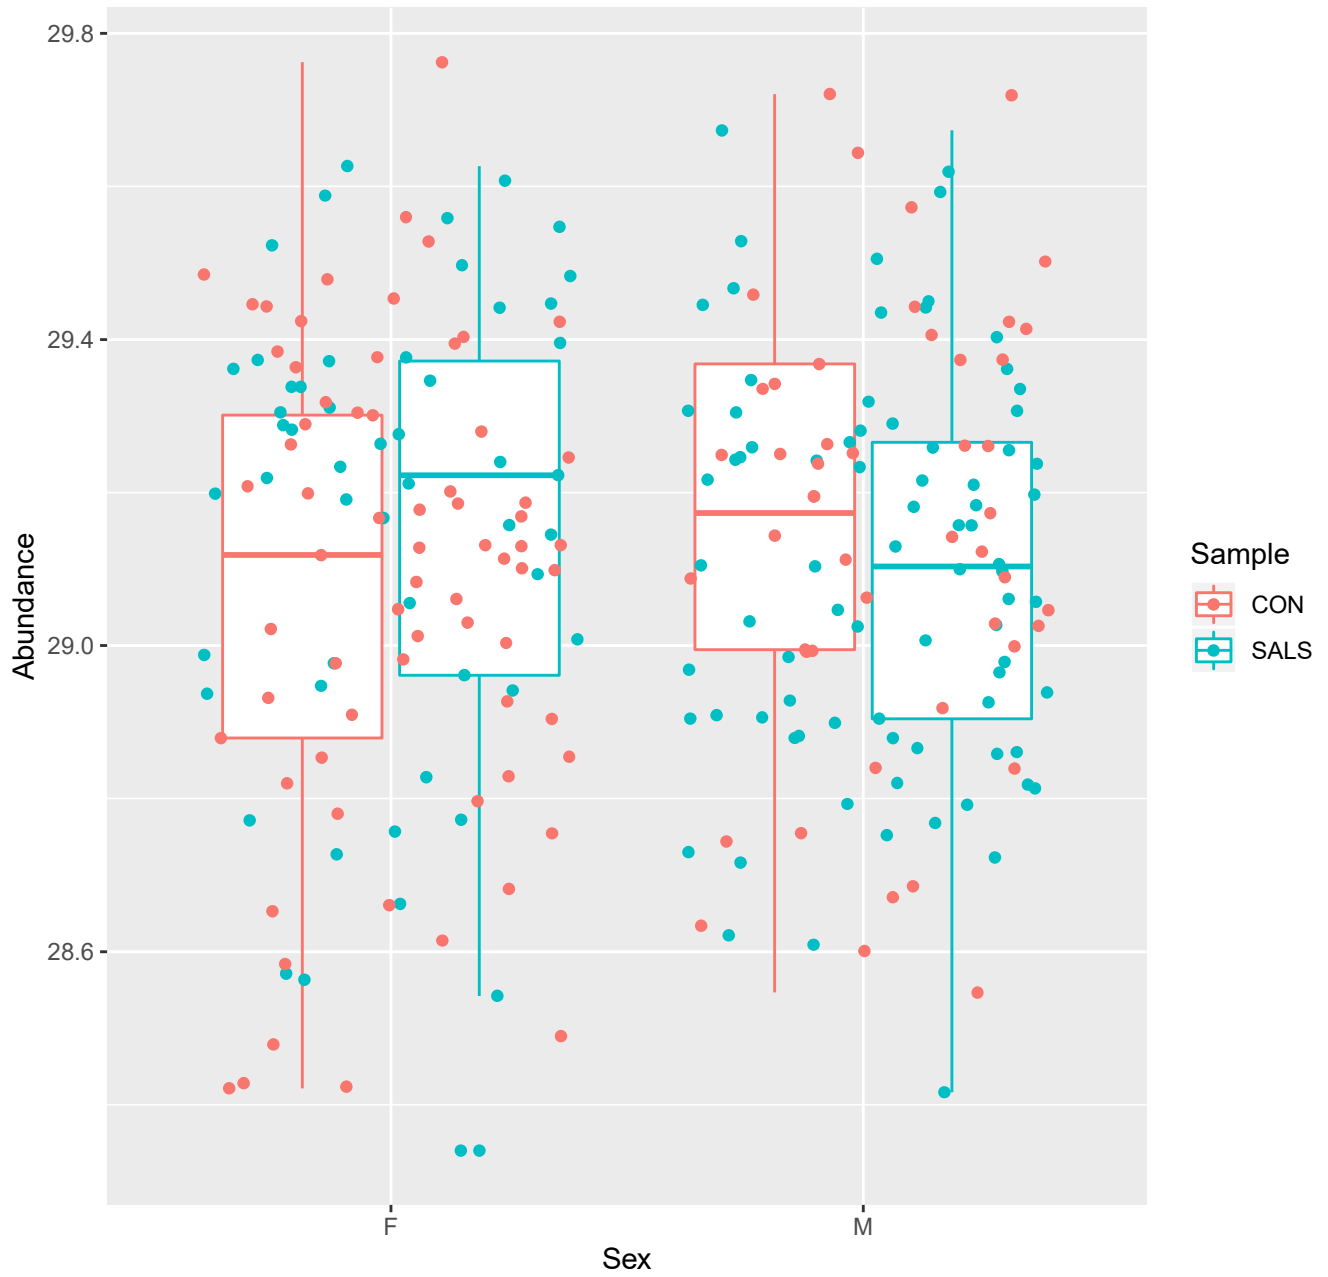

X123.0560.m.z pval= 0.3154 pvalf= 0.4325 pvalm= 0.0467

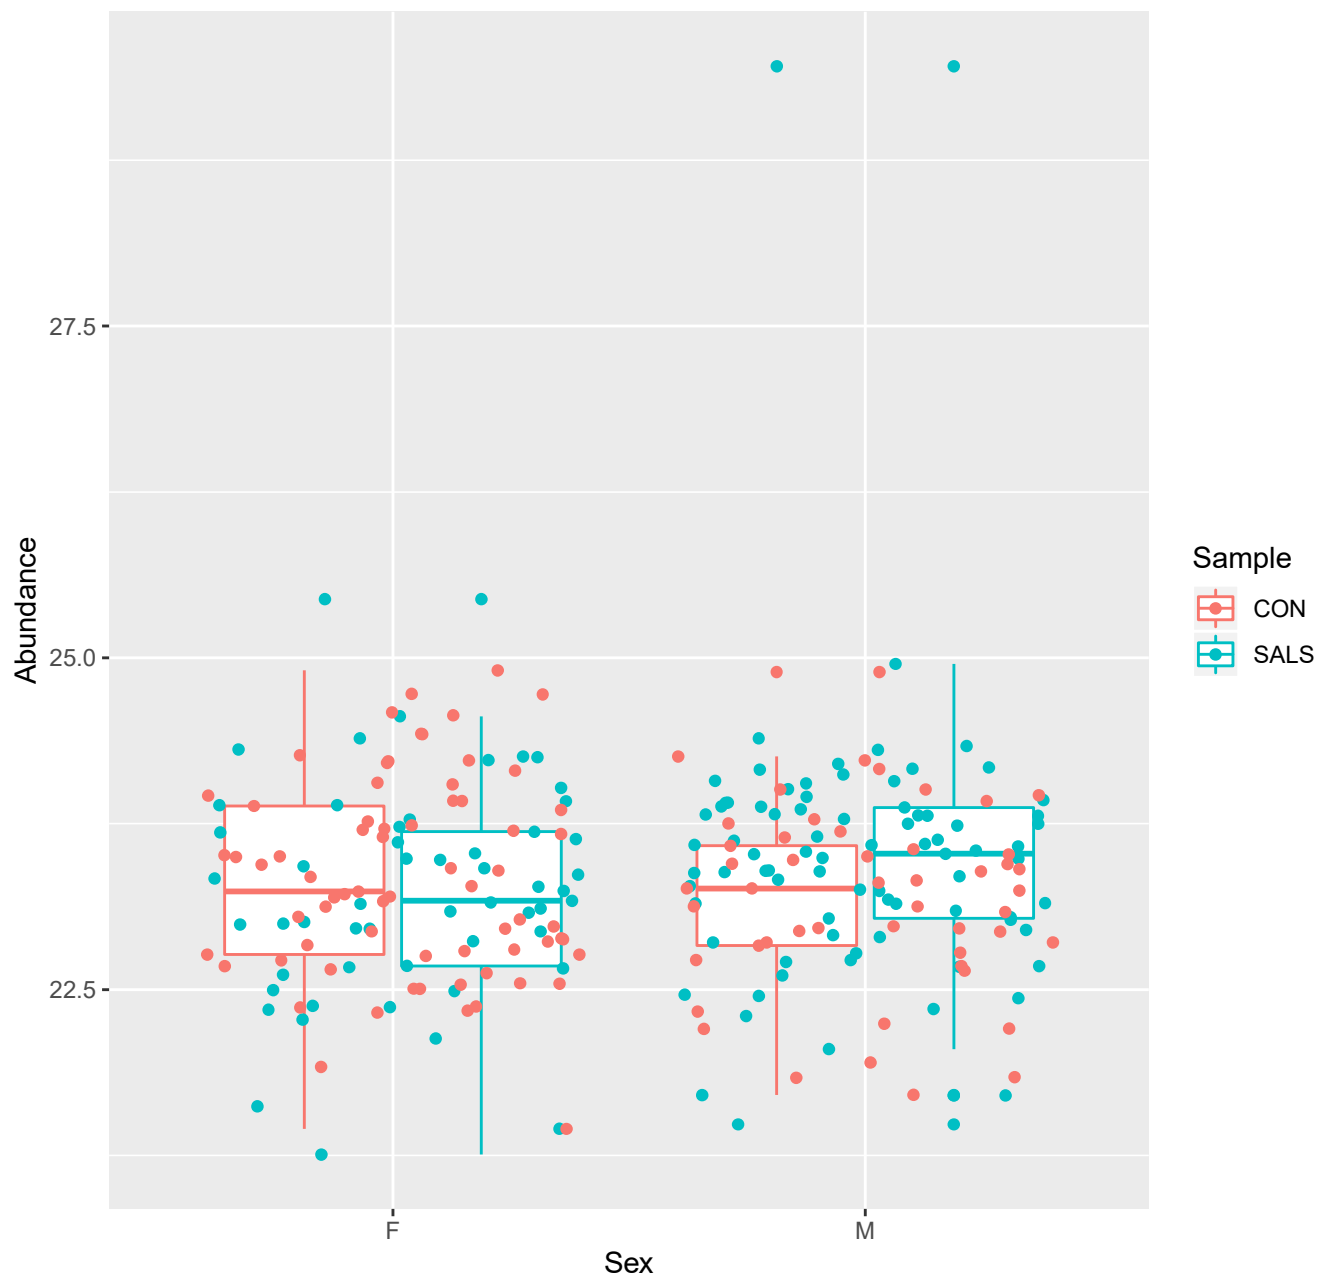

X188.0714.m.z pval= 0.991 pvalf= 0.3385 pvalm= 0.2066

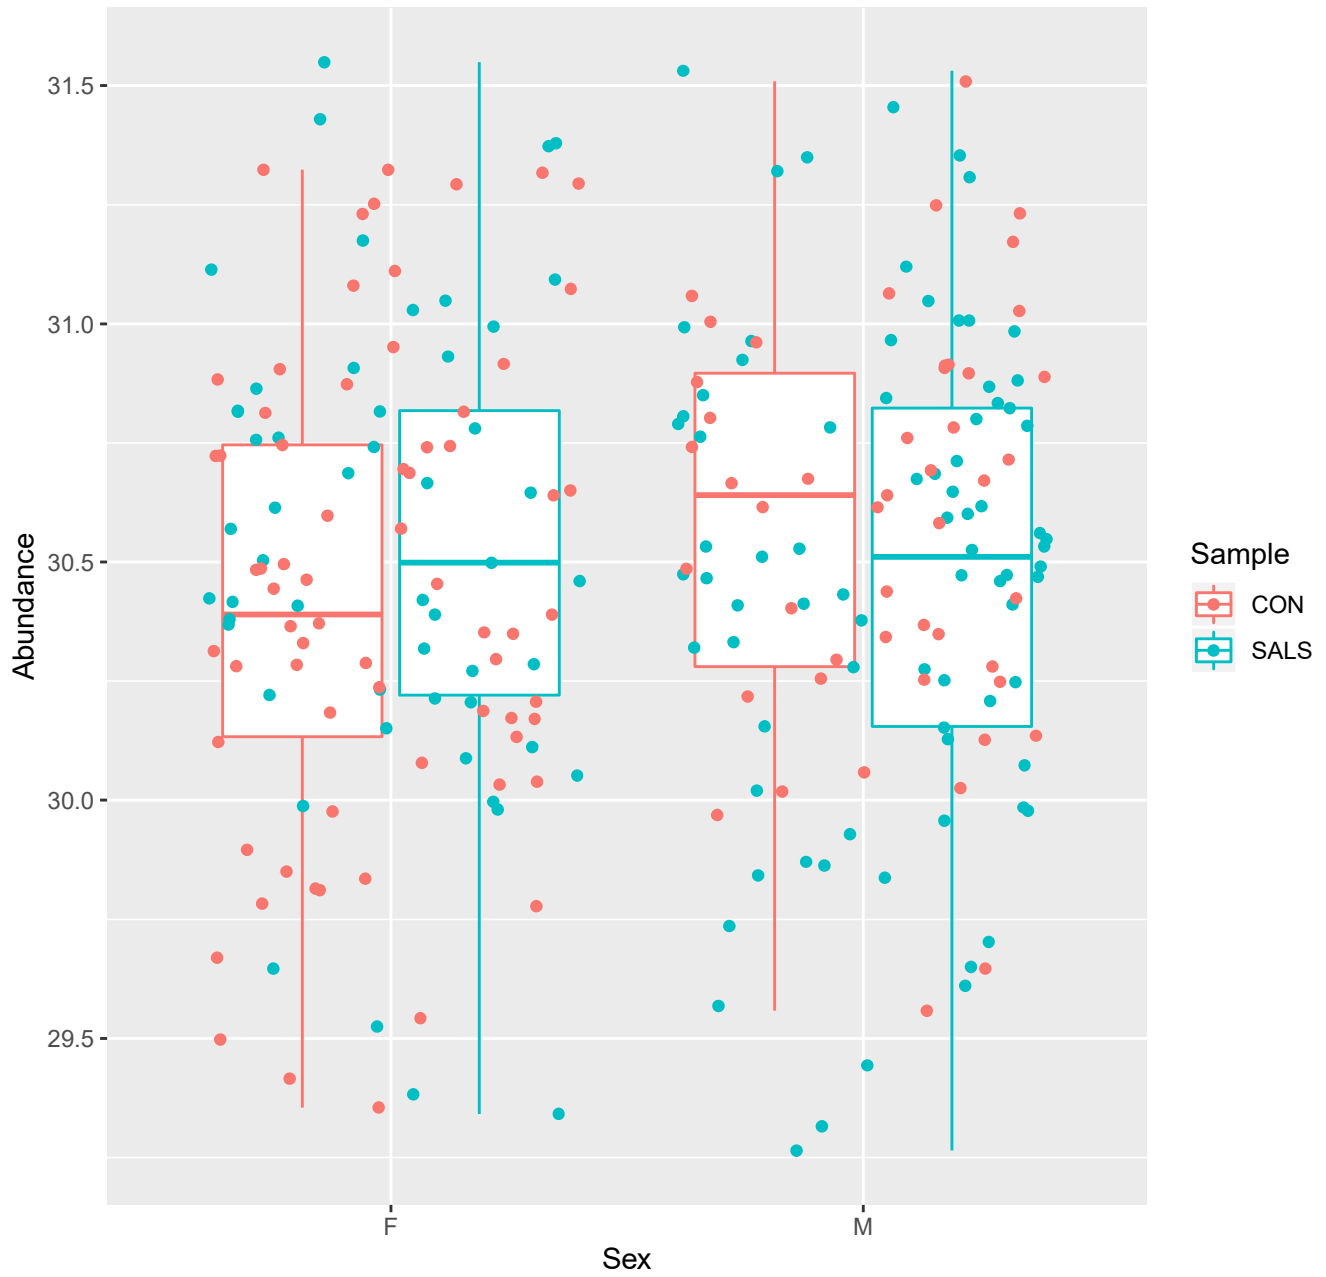

X118.0658.m.z pval= 0.974 pvalf= 0.4883 pvalm= 0.3764

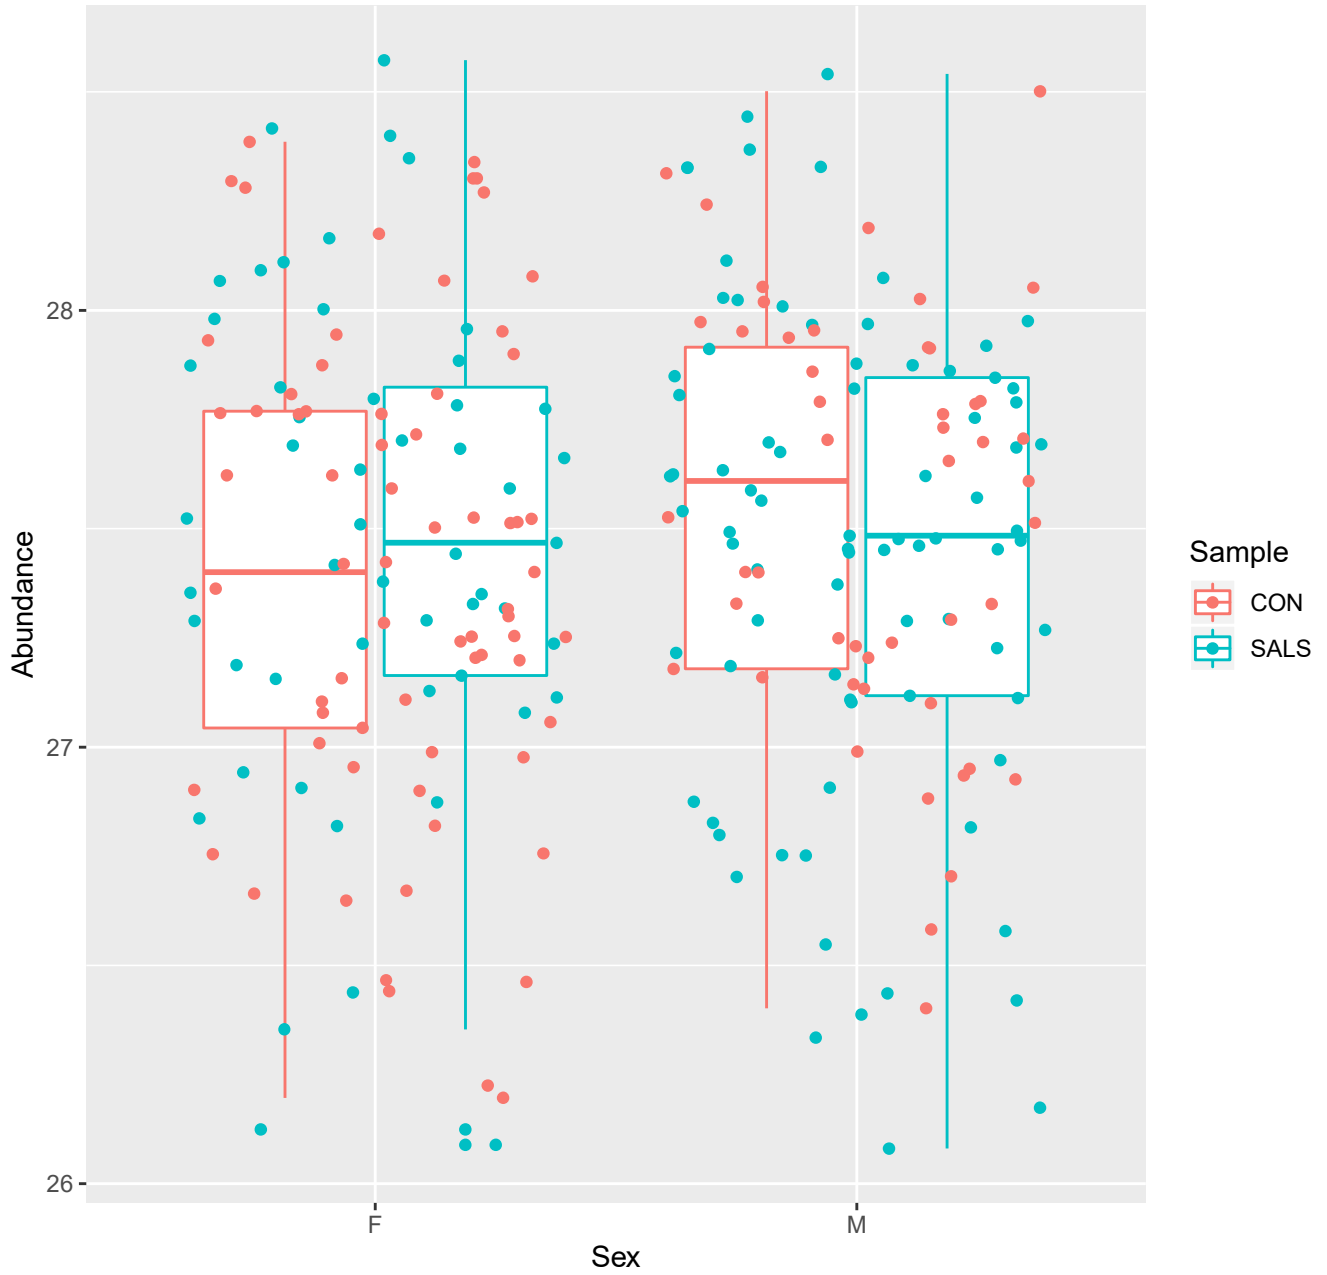

X209.0931.m.z pval= 0.391 pvalf= 0.4105 pvalm= 0.4398

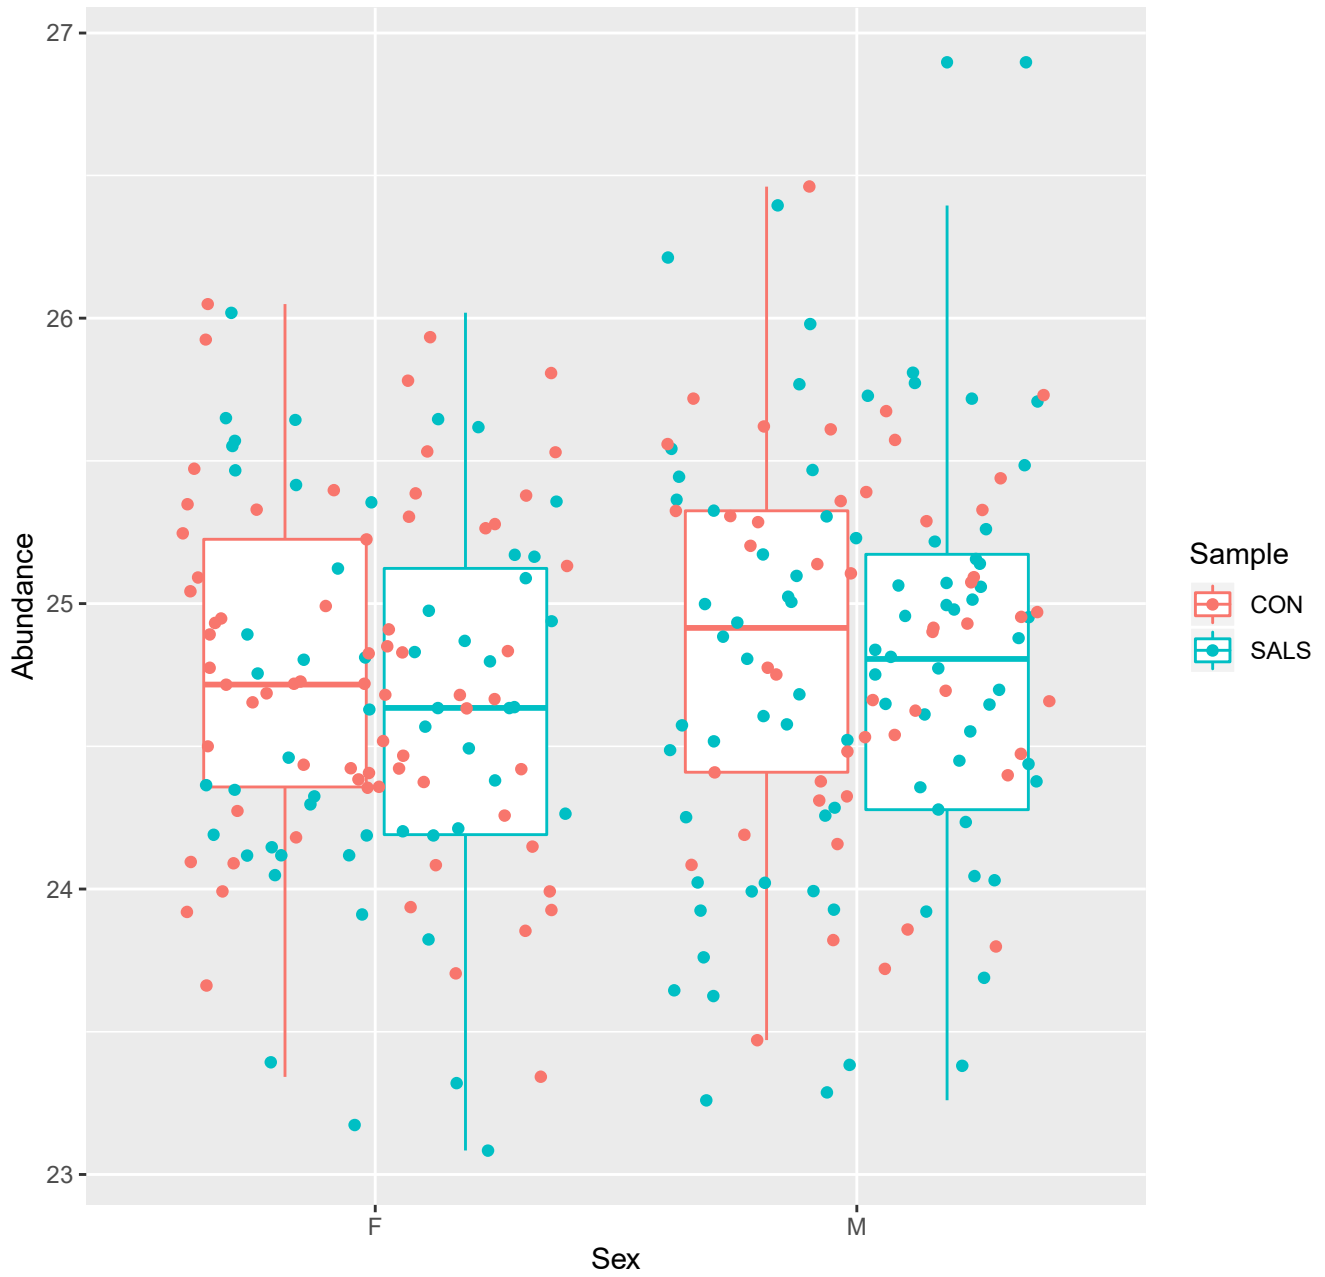

X136.0763.m.z pval= 0.6266 pvalf= 0.2028 pvalm= 0.7497

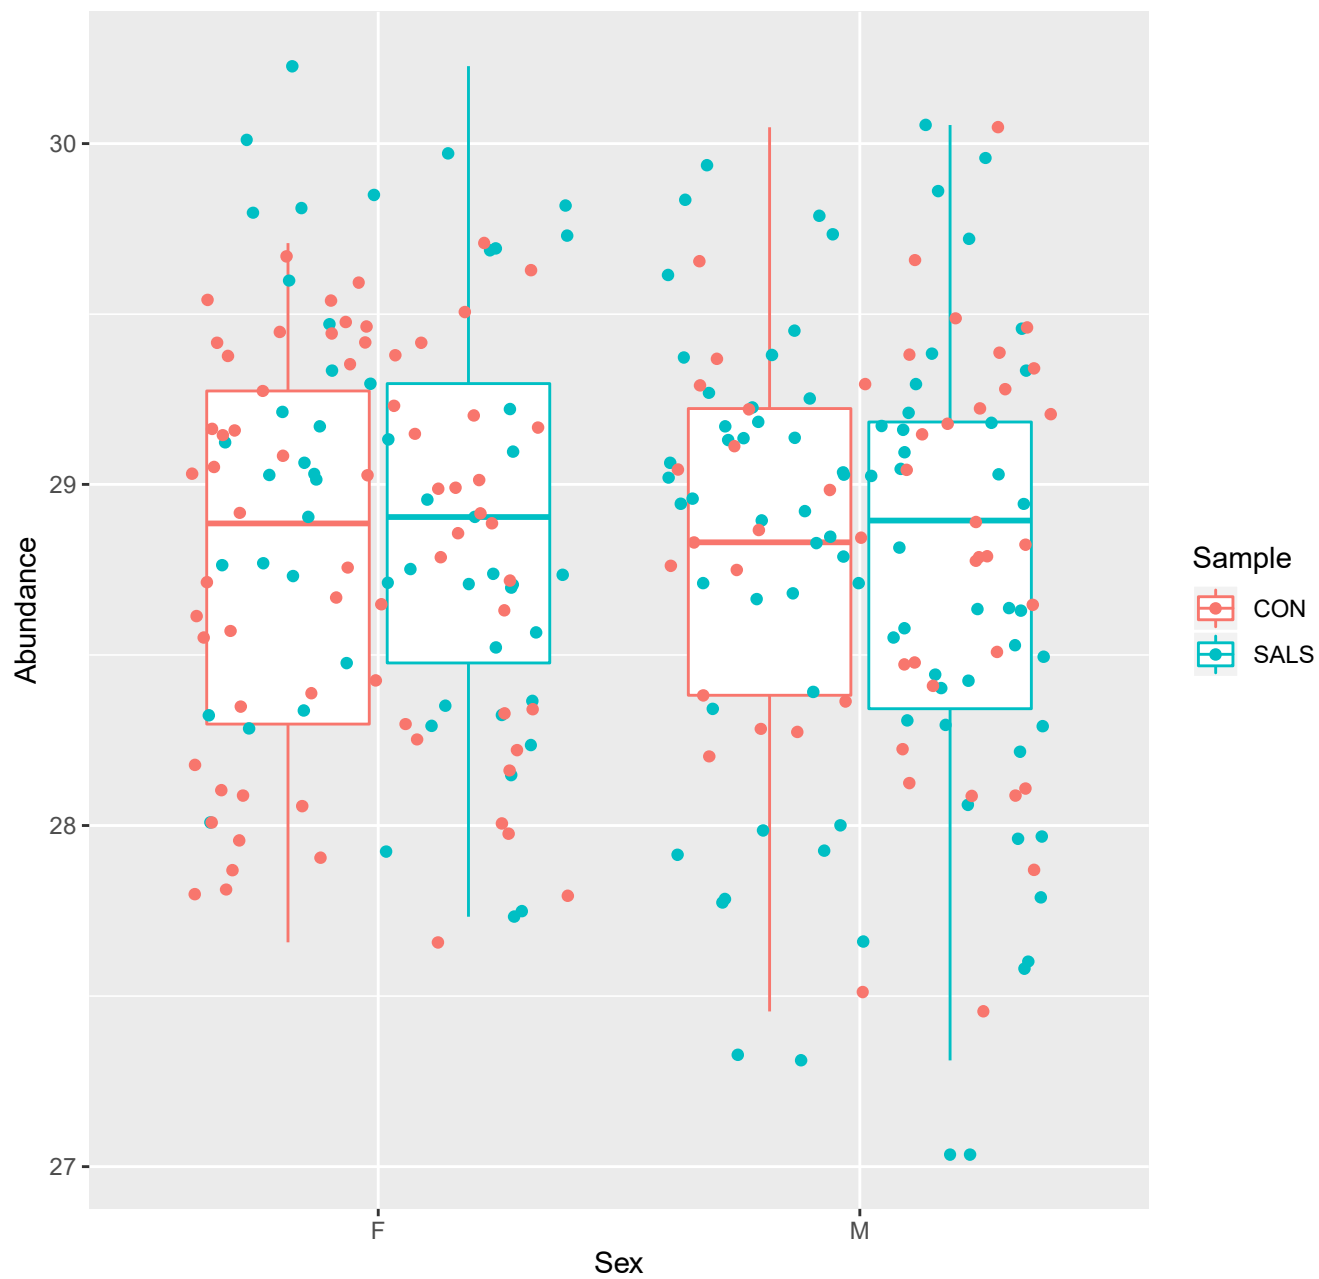

X159.0772.m.z pval= 0.6766 pvalf= 0.325 pvalm= 0.8146

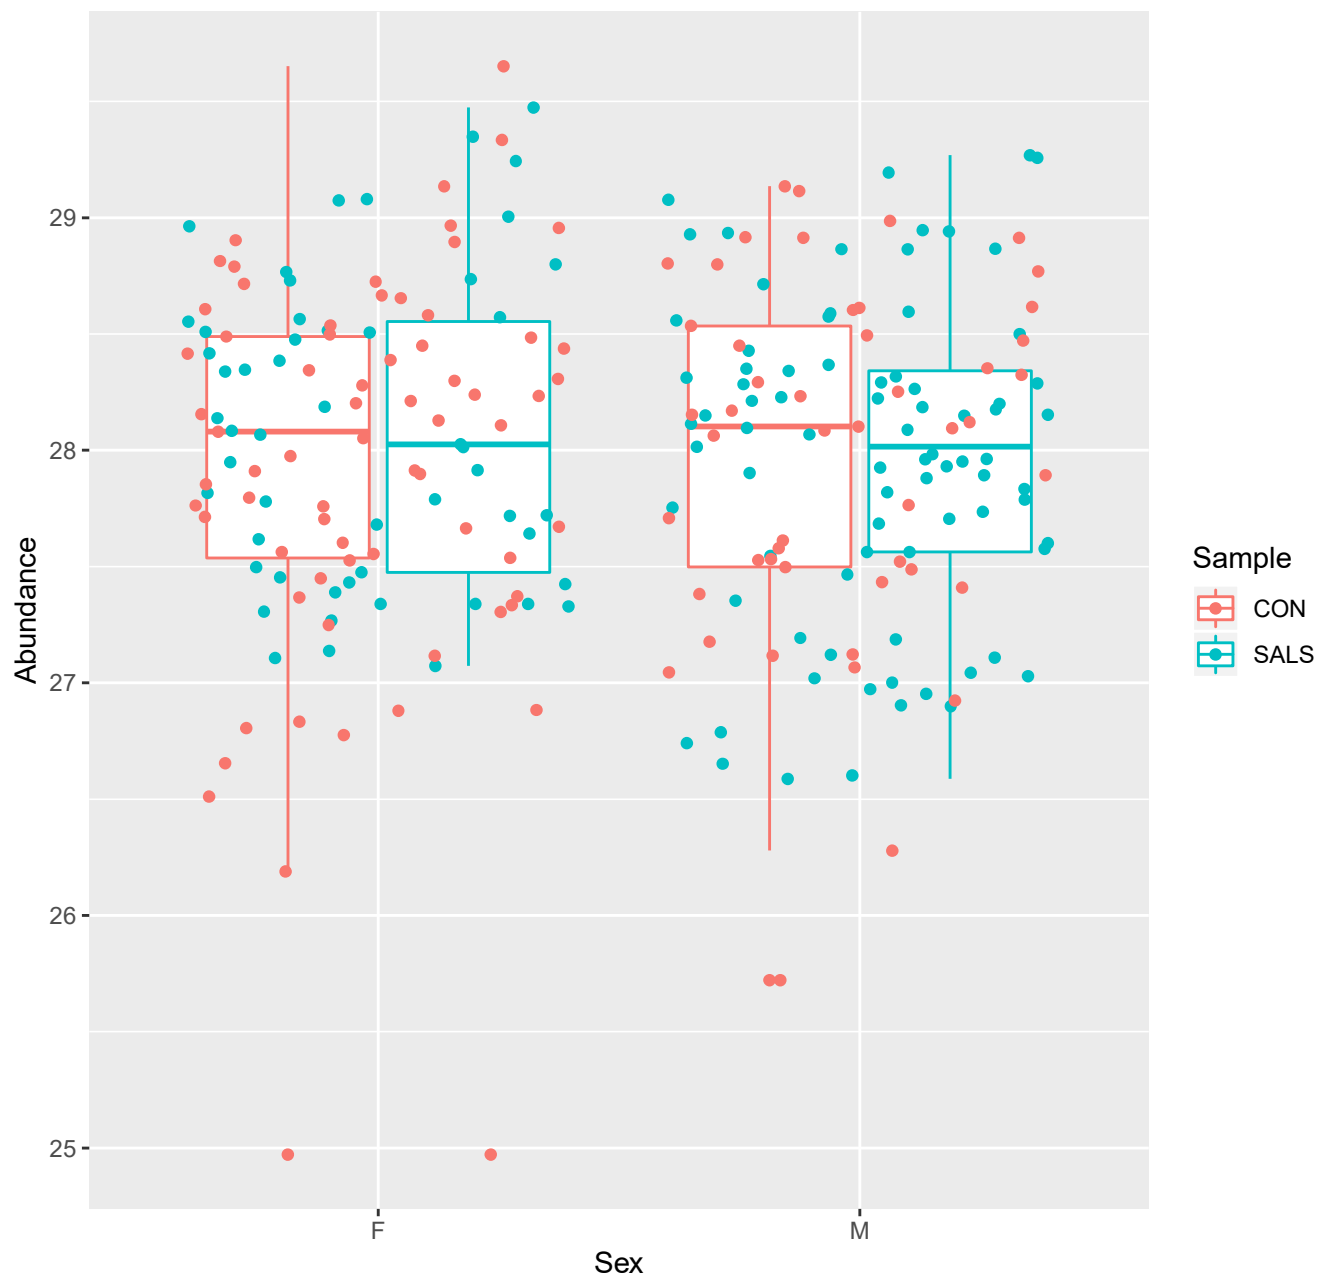

X165.0554.m.z pval= 0.6342 pvalf= 0.187 pvalm= 0.7101

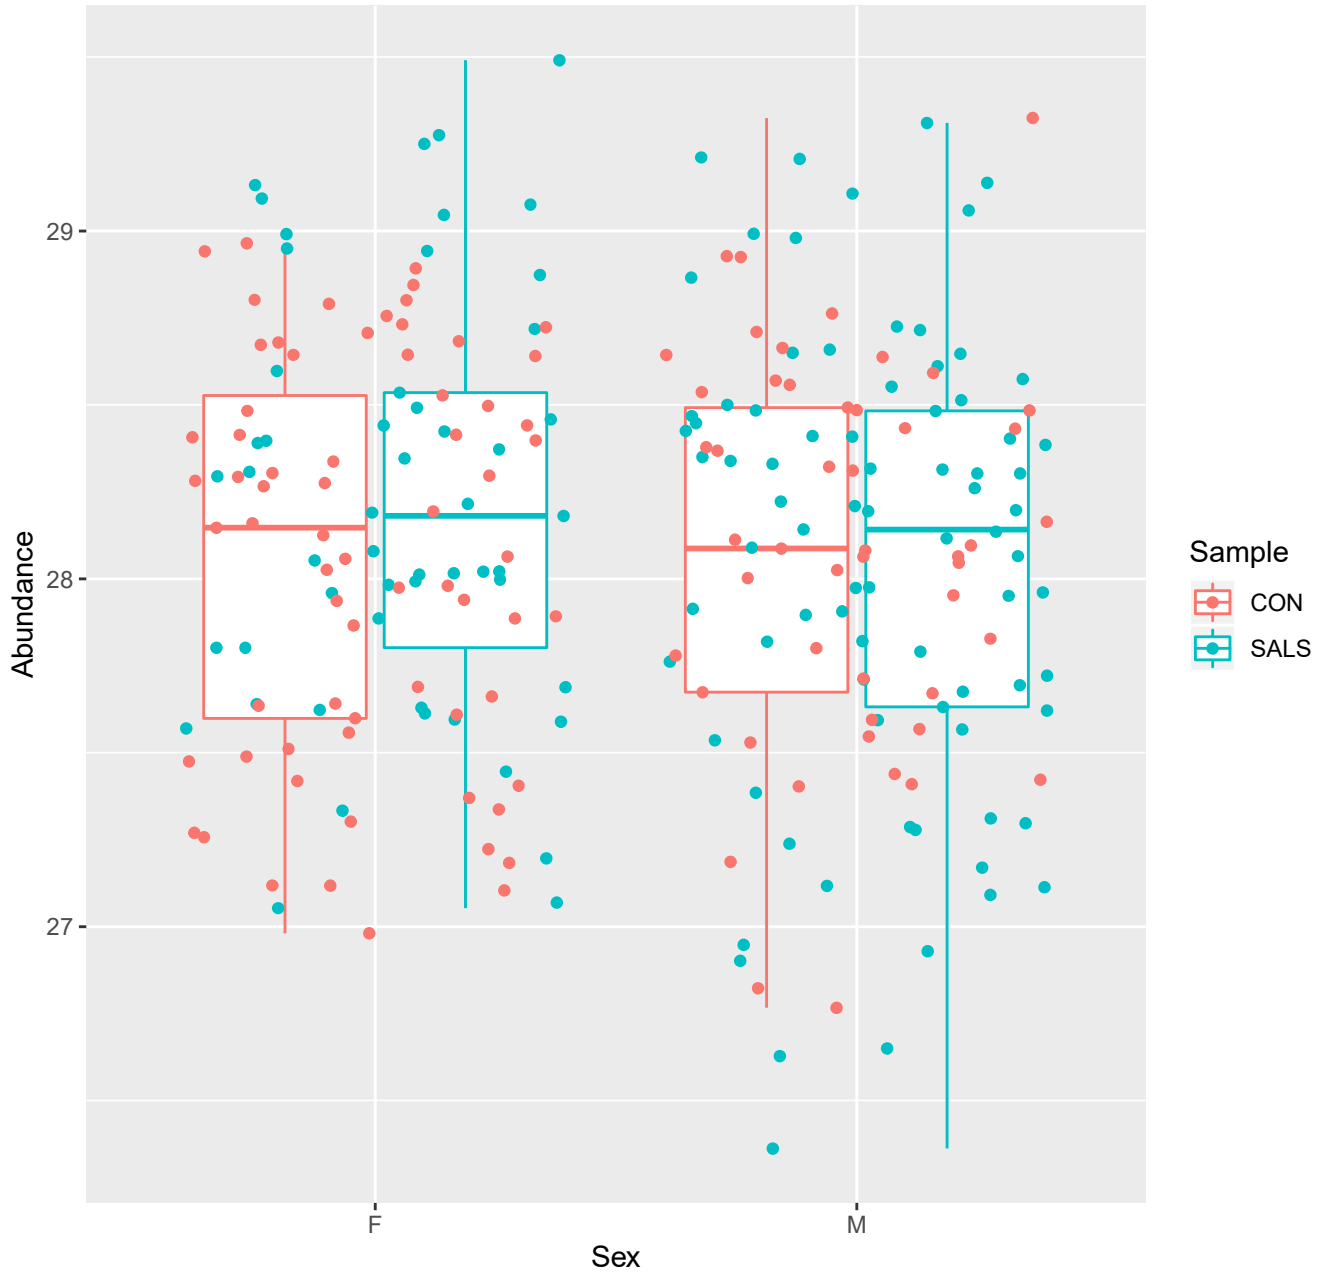

Supplement: NIHMS1611259-supplement-Supplemental_File_2.pdf [file NIHMS1611259-supplement-Supplemental_File_2.pdf]
