# Supplementary material
Source: PubMed Central journal article supplement (PMC8273918)

Alanine R2\_F,M = 0.149 , 0.0366 pval\_F,M = 0.0127 , 0.158

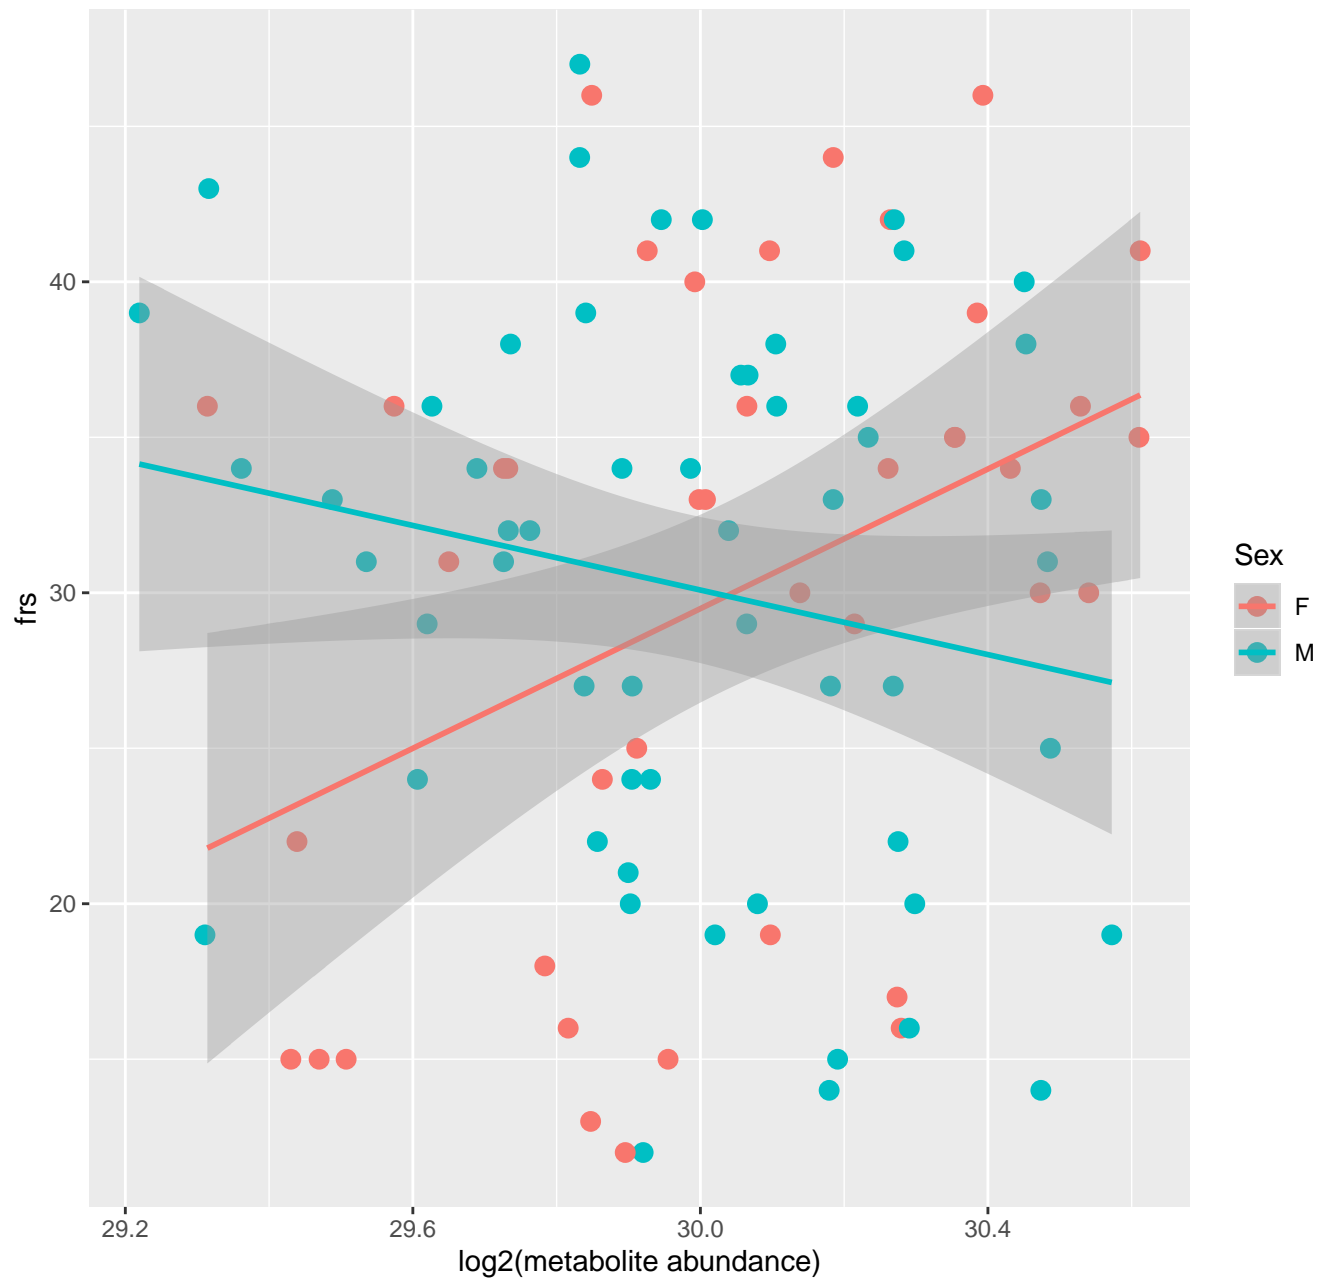

Arginine R2\_F,M = 0.0917 , 0.016 pval\_F,M = 0.0543 , 0.352

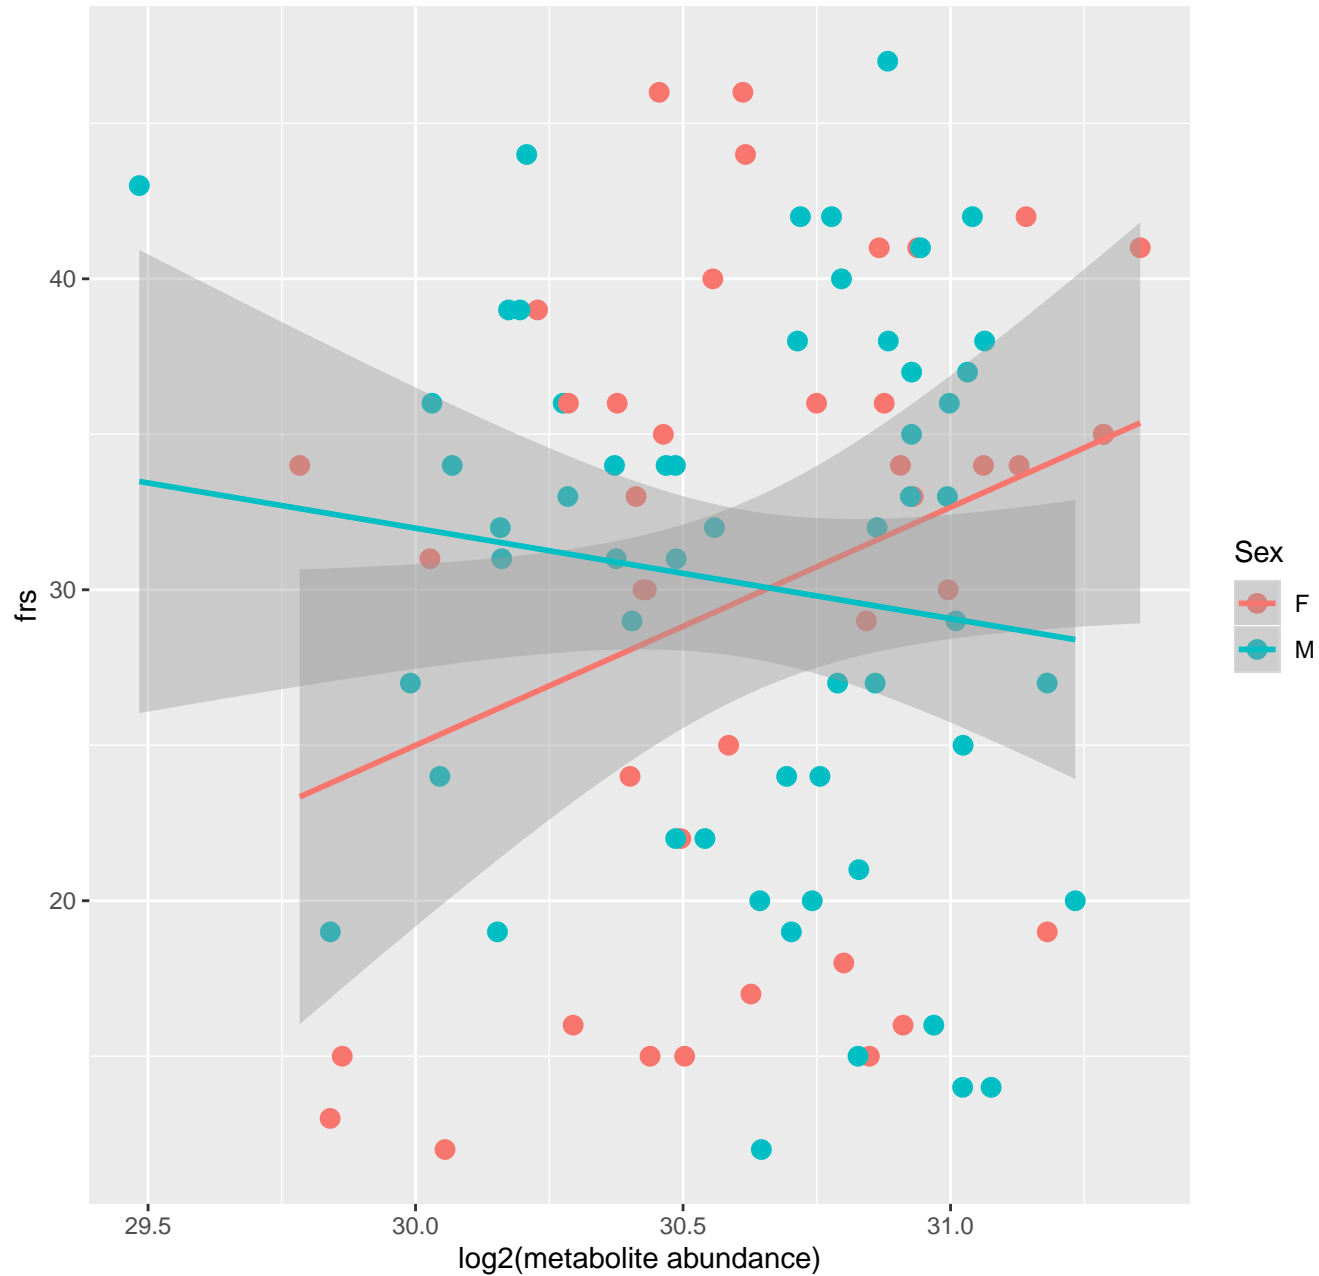

Asparagine R2\_F,M = 0.11 , 0.000694 pval\_F,M = 0.0342 , 0.847

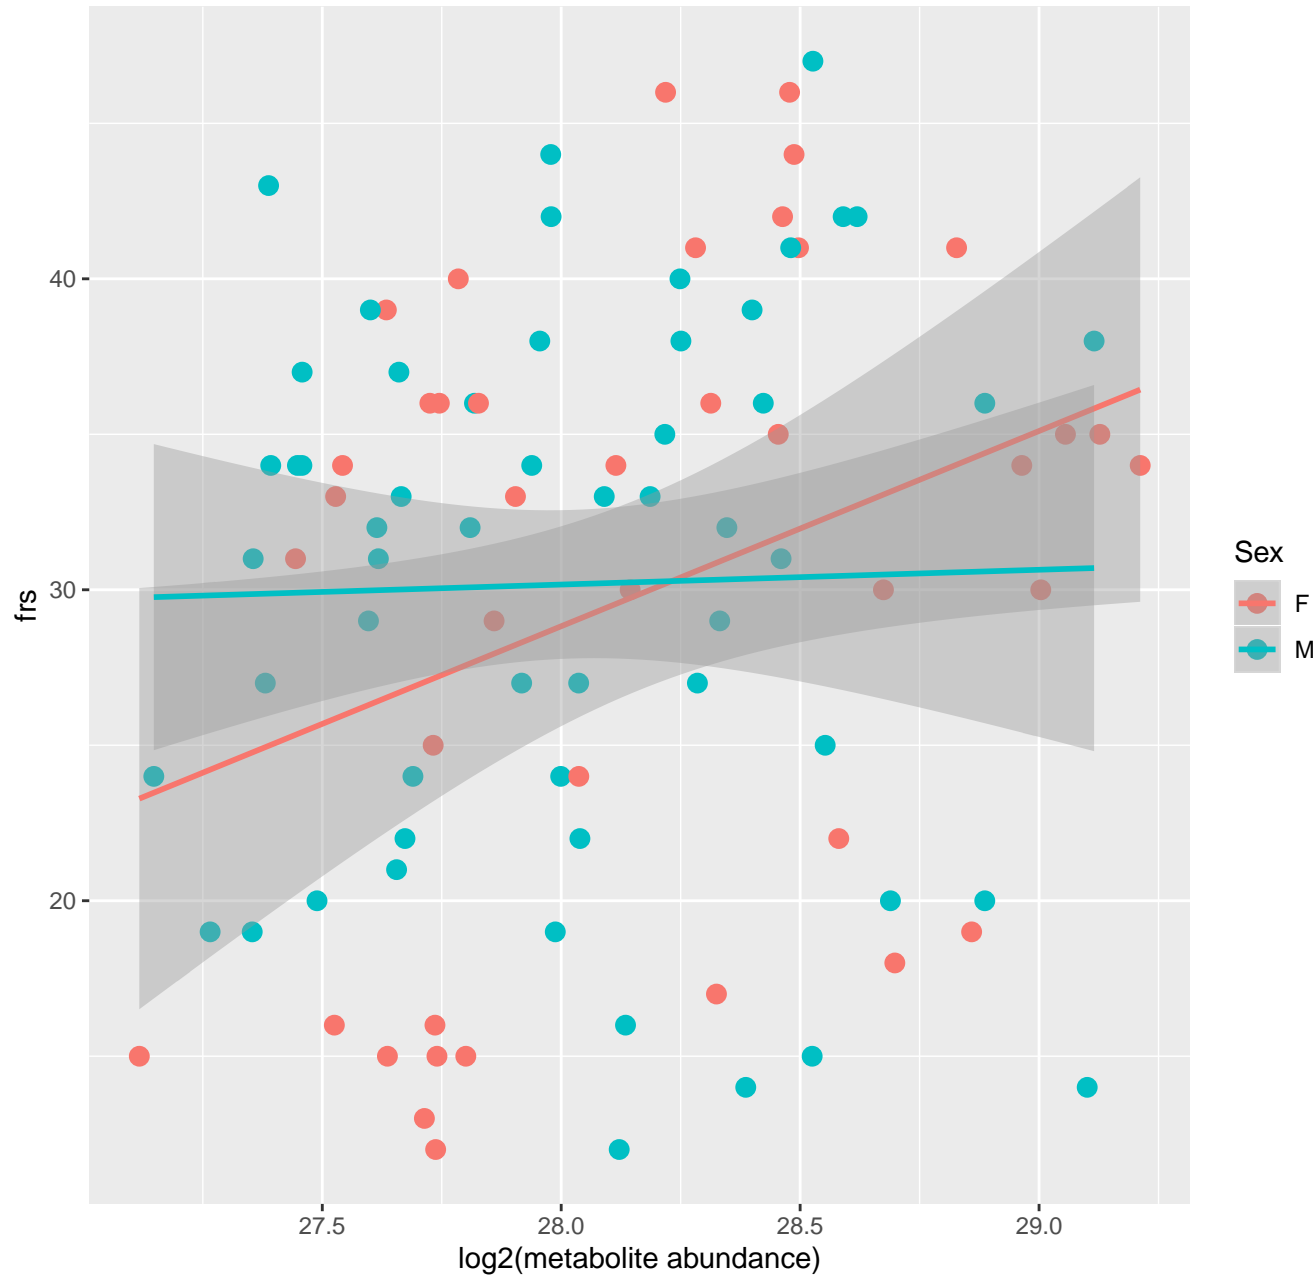

Aspartic.acid R2\_F,M = 0.0302 , 0.00136 pval\_F,M = 0.277 , 0.787

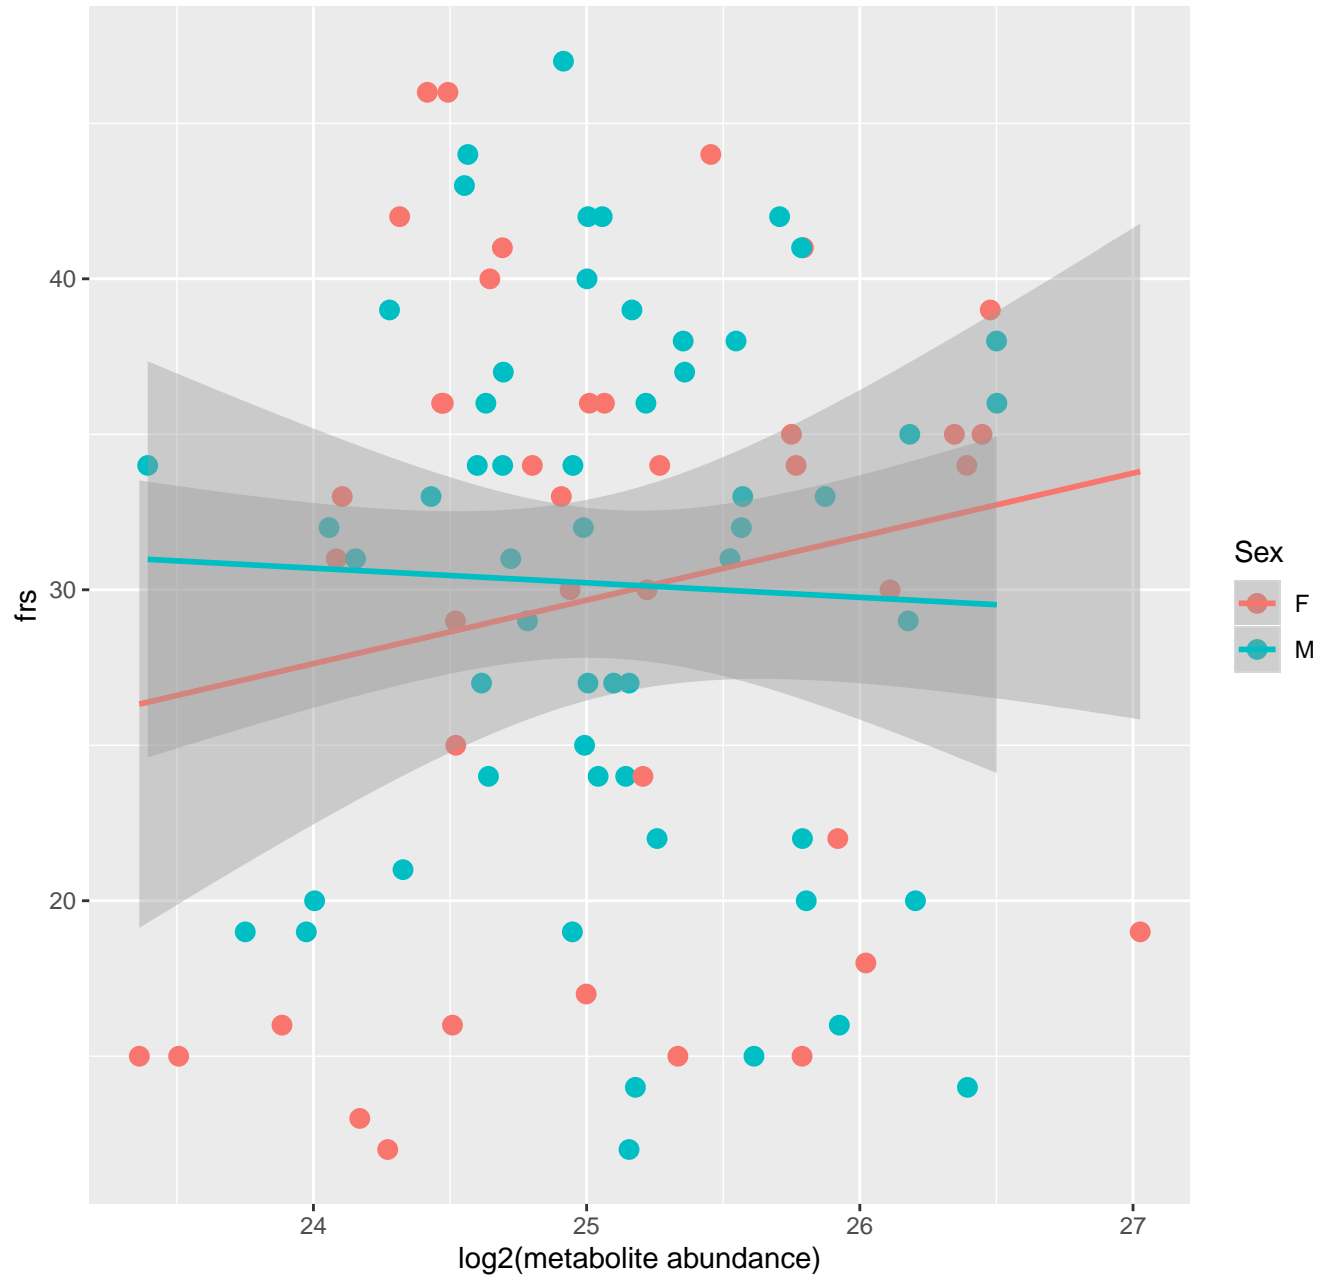

Cysteine R2\_F,M = 0.0438 , 0.0112 pval\_F,M = 0.189 , 0.438

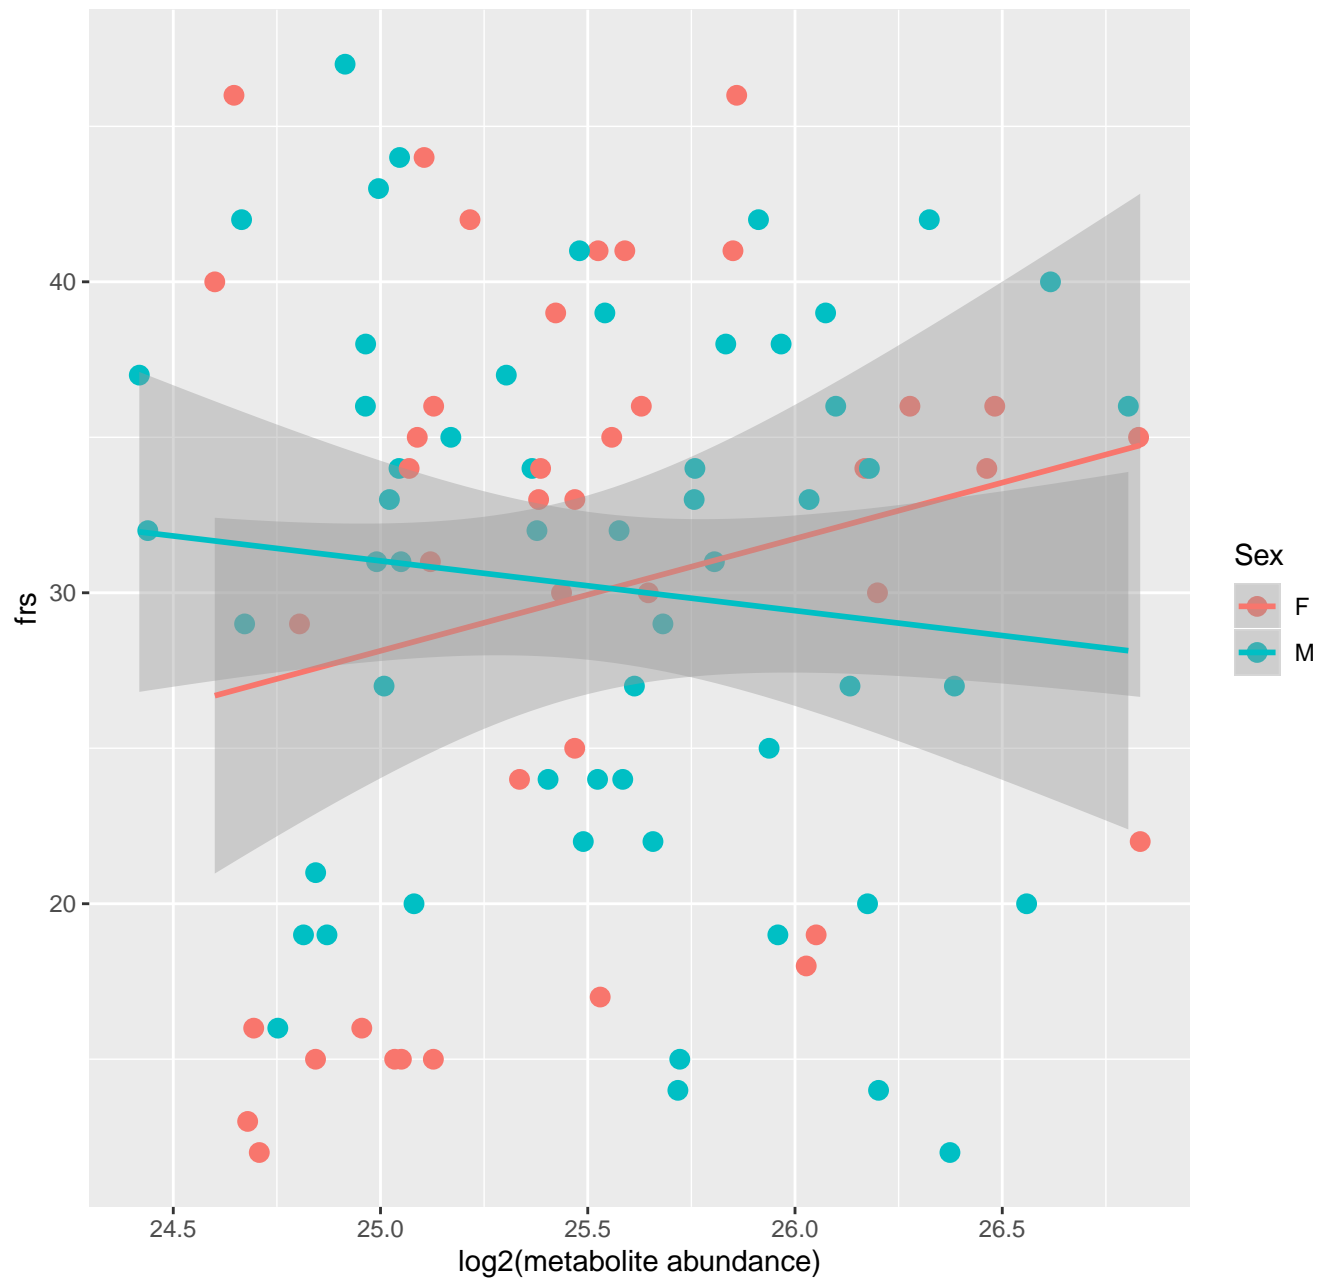

Glutamine R2\_F,M = 0.0268 , 7.58e-07 pval\_F,M = 0.307 , 0.995

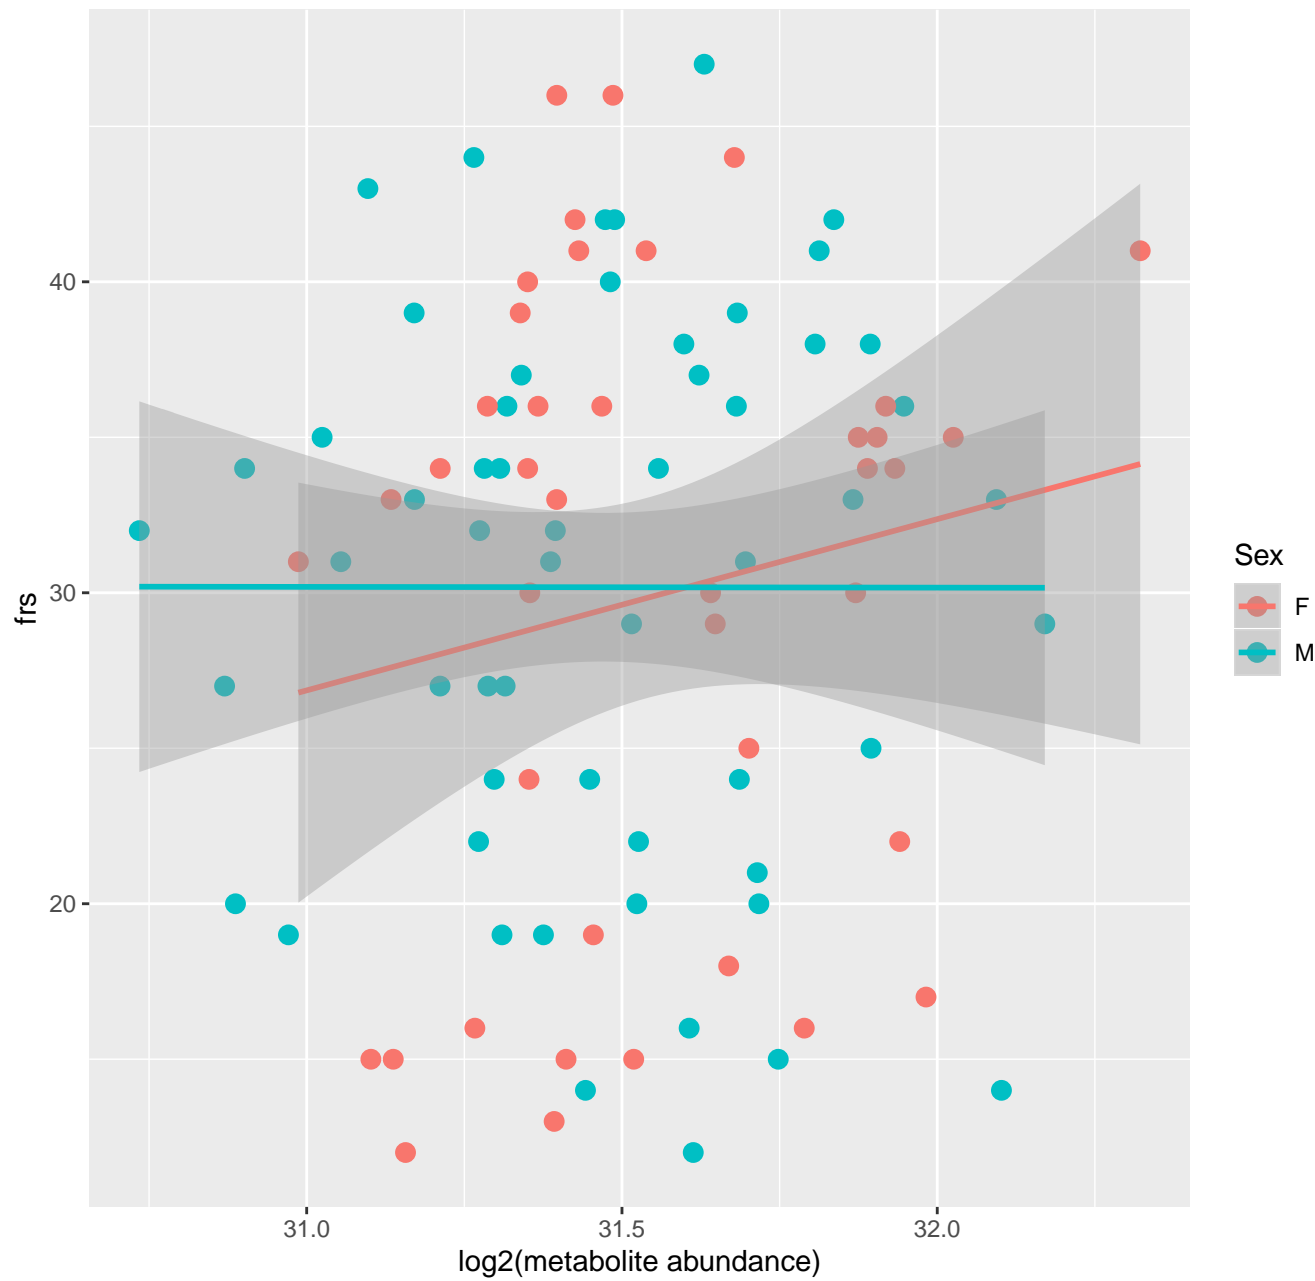

Glutamic.acid R2\_F,M = 0.0179 , 0.00747 pval\_F,M = 0.405 , 0.527

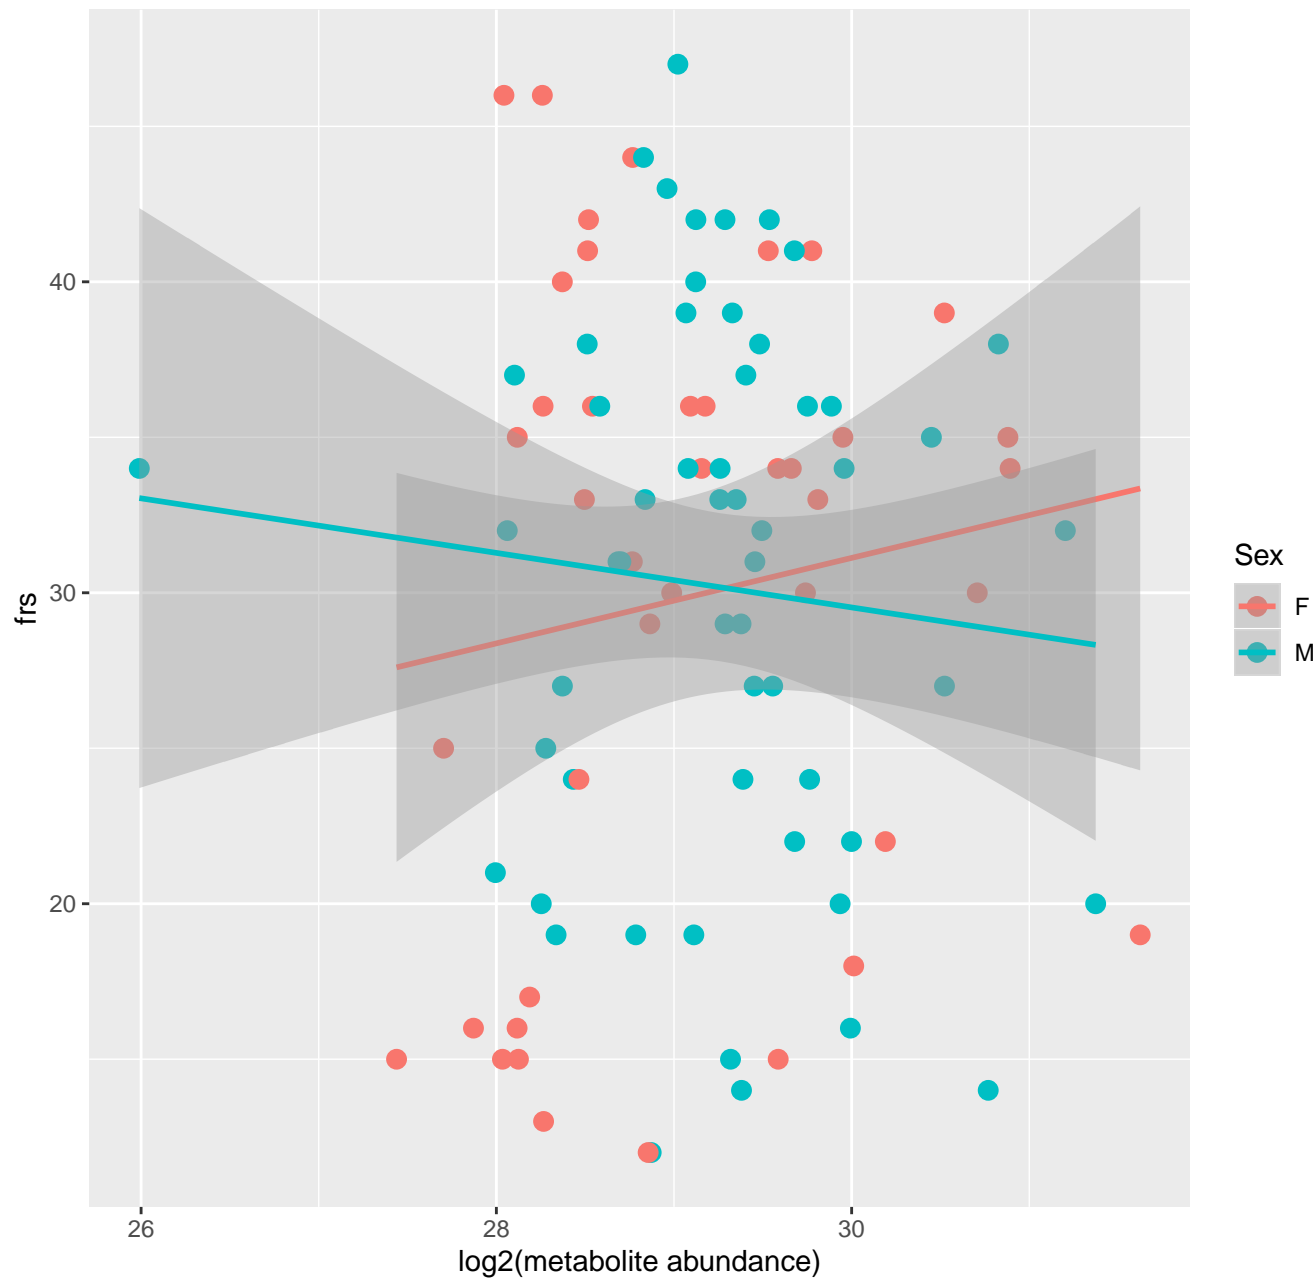

Glycine R2\_F,M = 0.1 , 0.0428 pval\_F,M = 0.0439 , 0.126

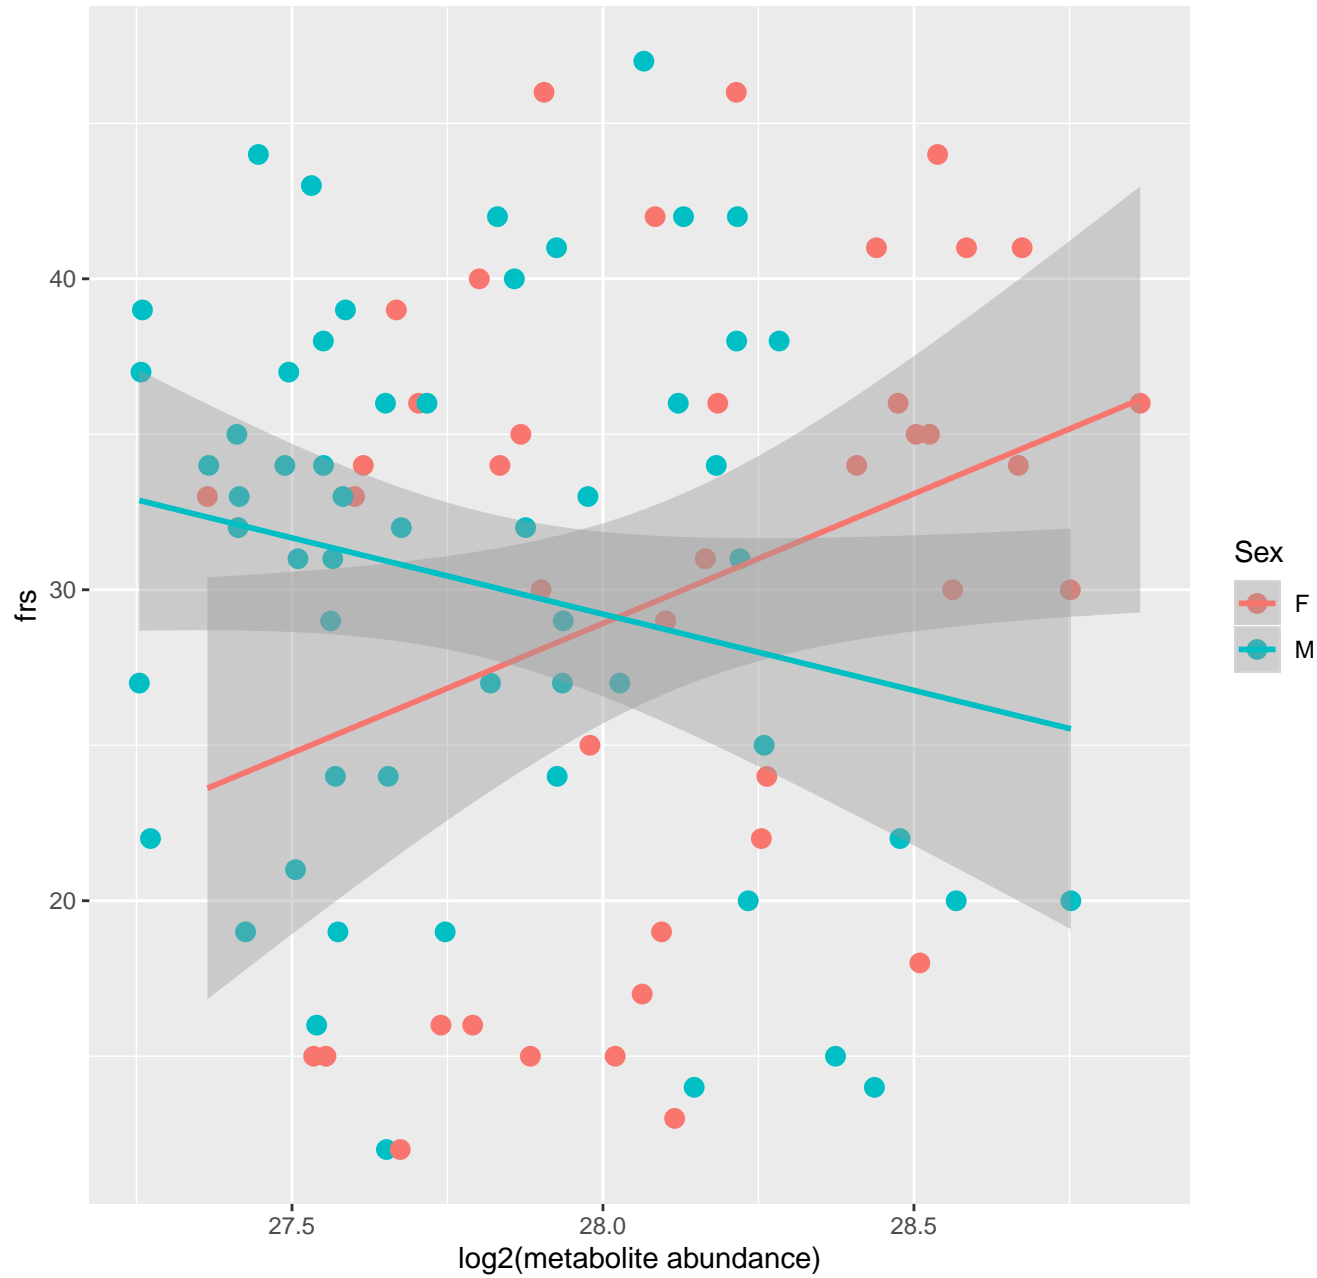



Histidine R2\_F,M = 0.149 , 0.000865 pval\_F,M = 0.0127 , 0.83

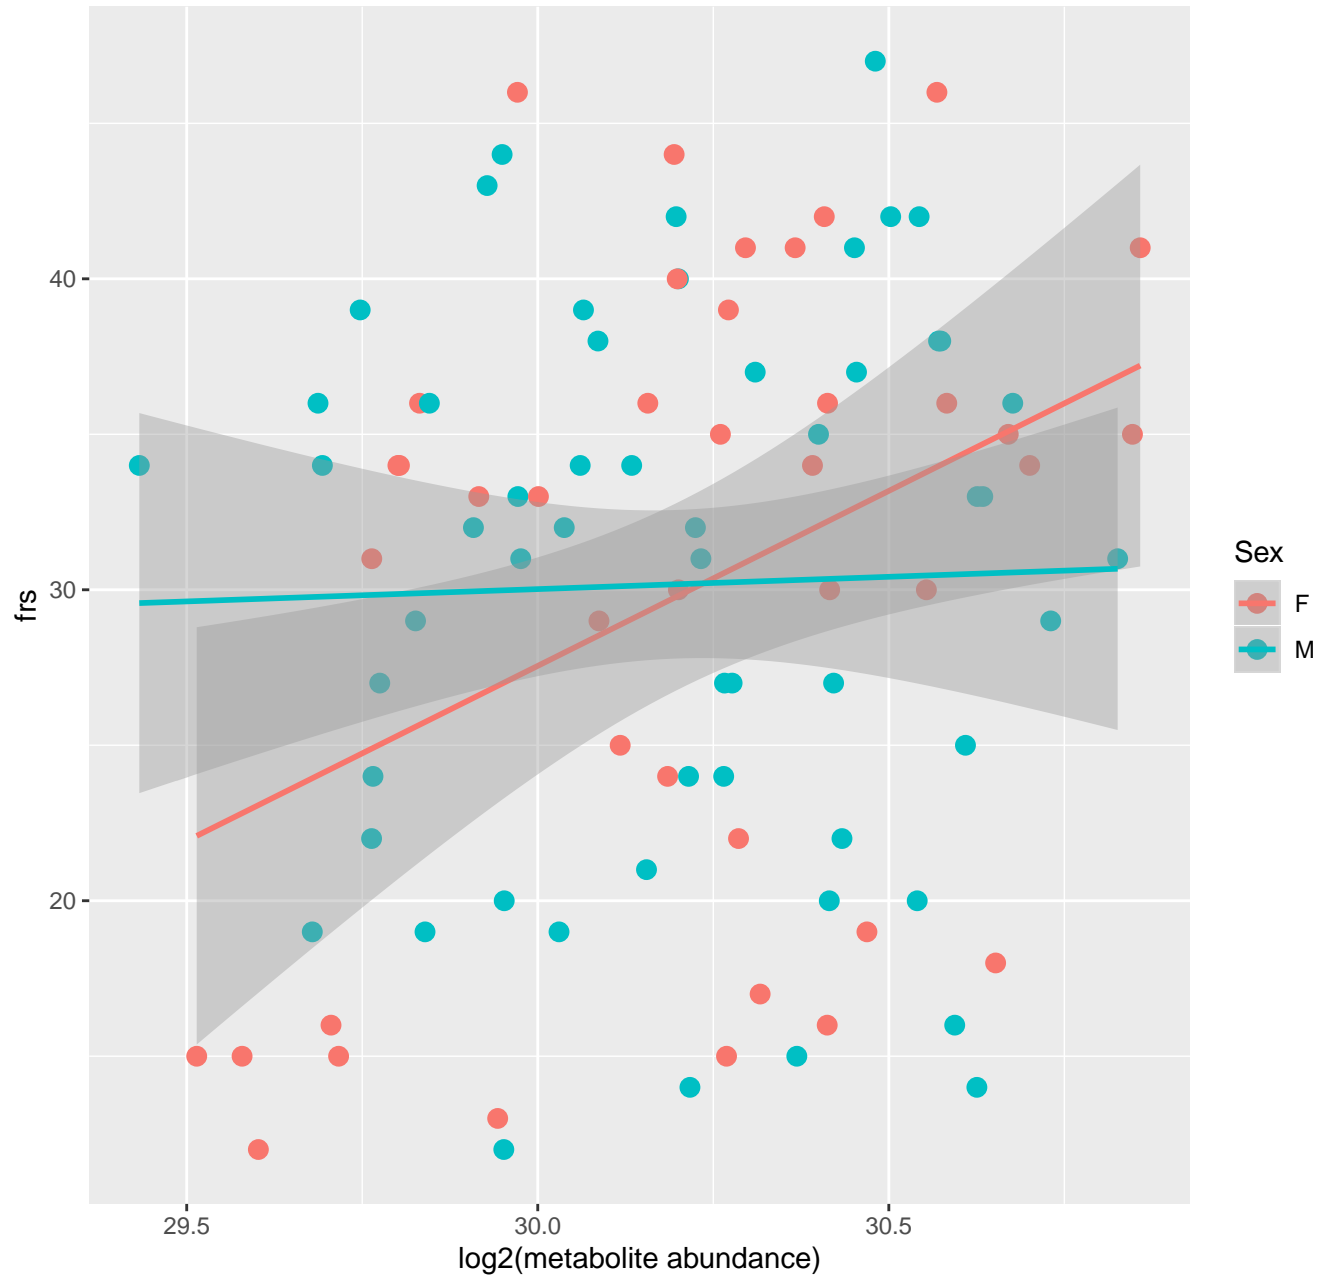

Isoleucine R2\_F,M = 0.00994 , 9.87e-06 pval\_F,M = 0.535 , 0.982

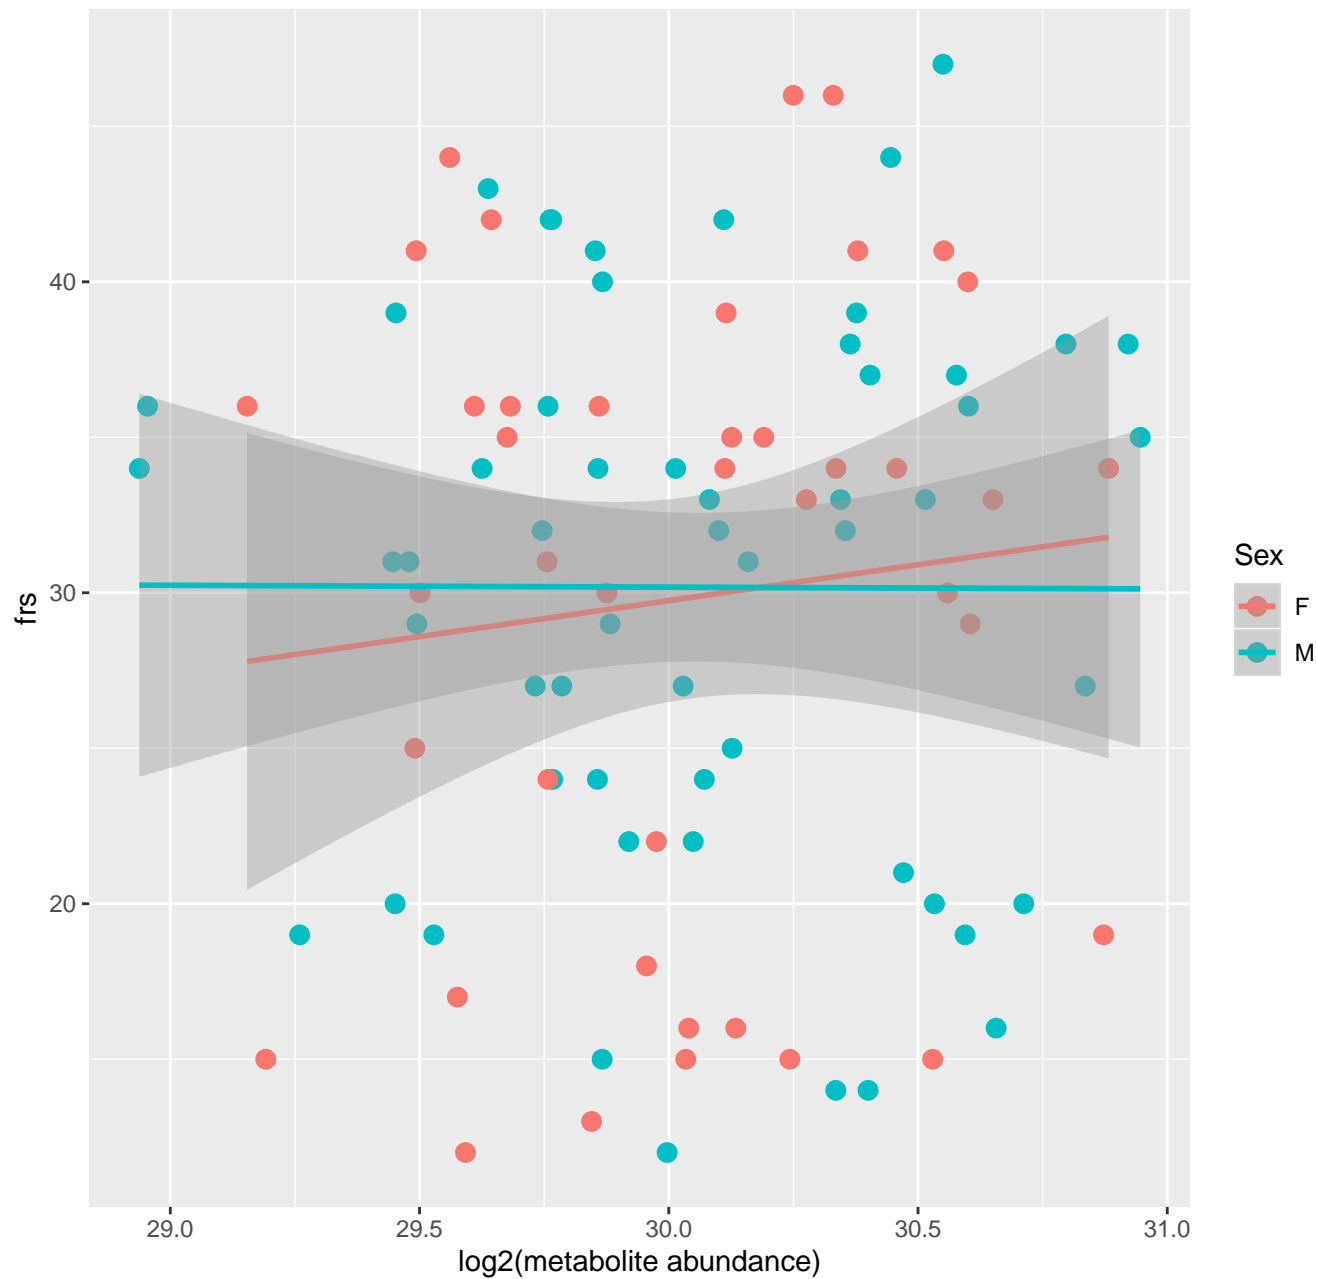

Leucine R2\_F,M = 0.0581 , 0.00162 pval\_F,M = 0.129 , 0.768

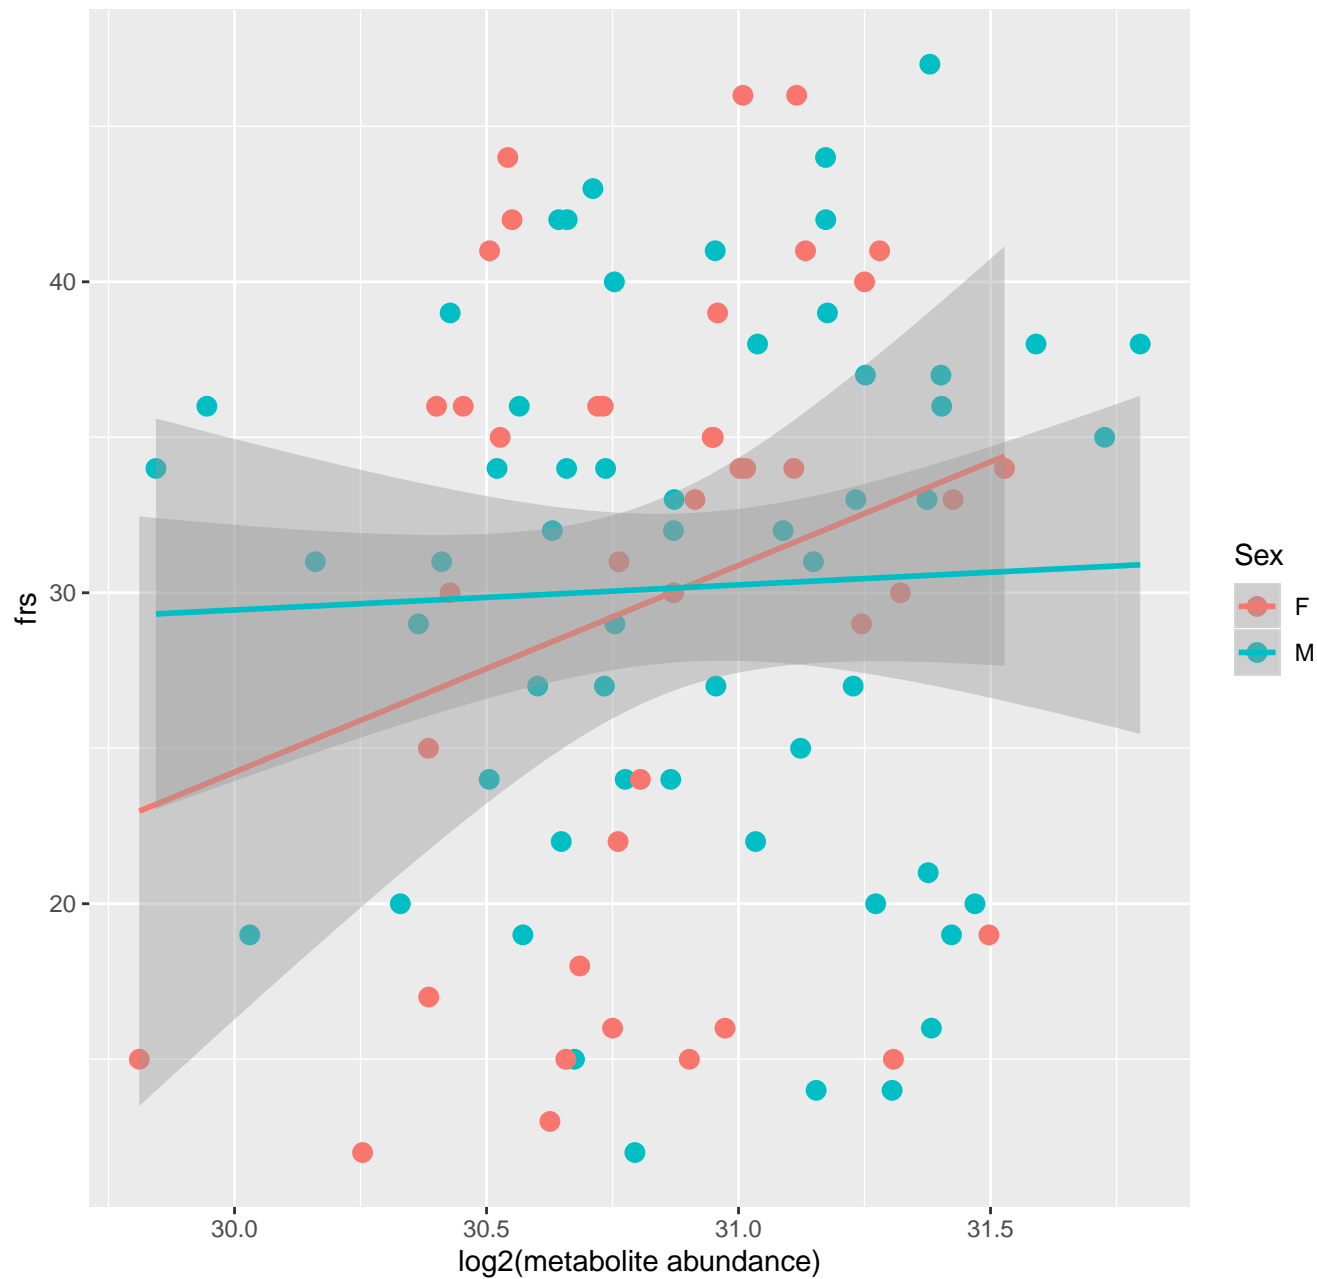

Lysine R2\_F,M = 0.0294 , 0.0645 pval\_F,M = 0.284 , 0.059

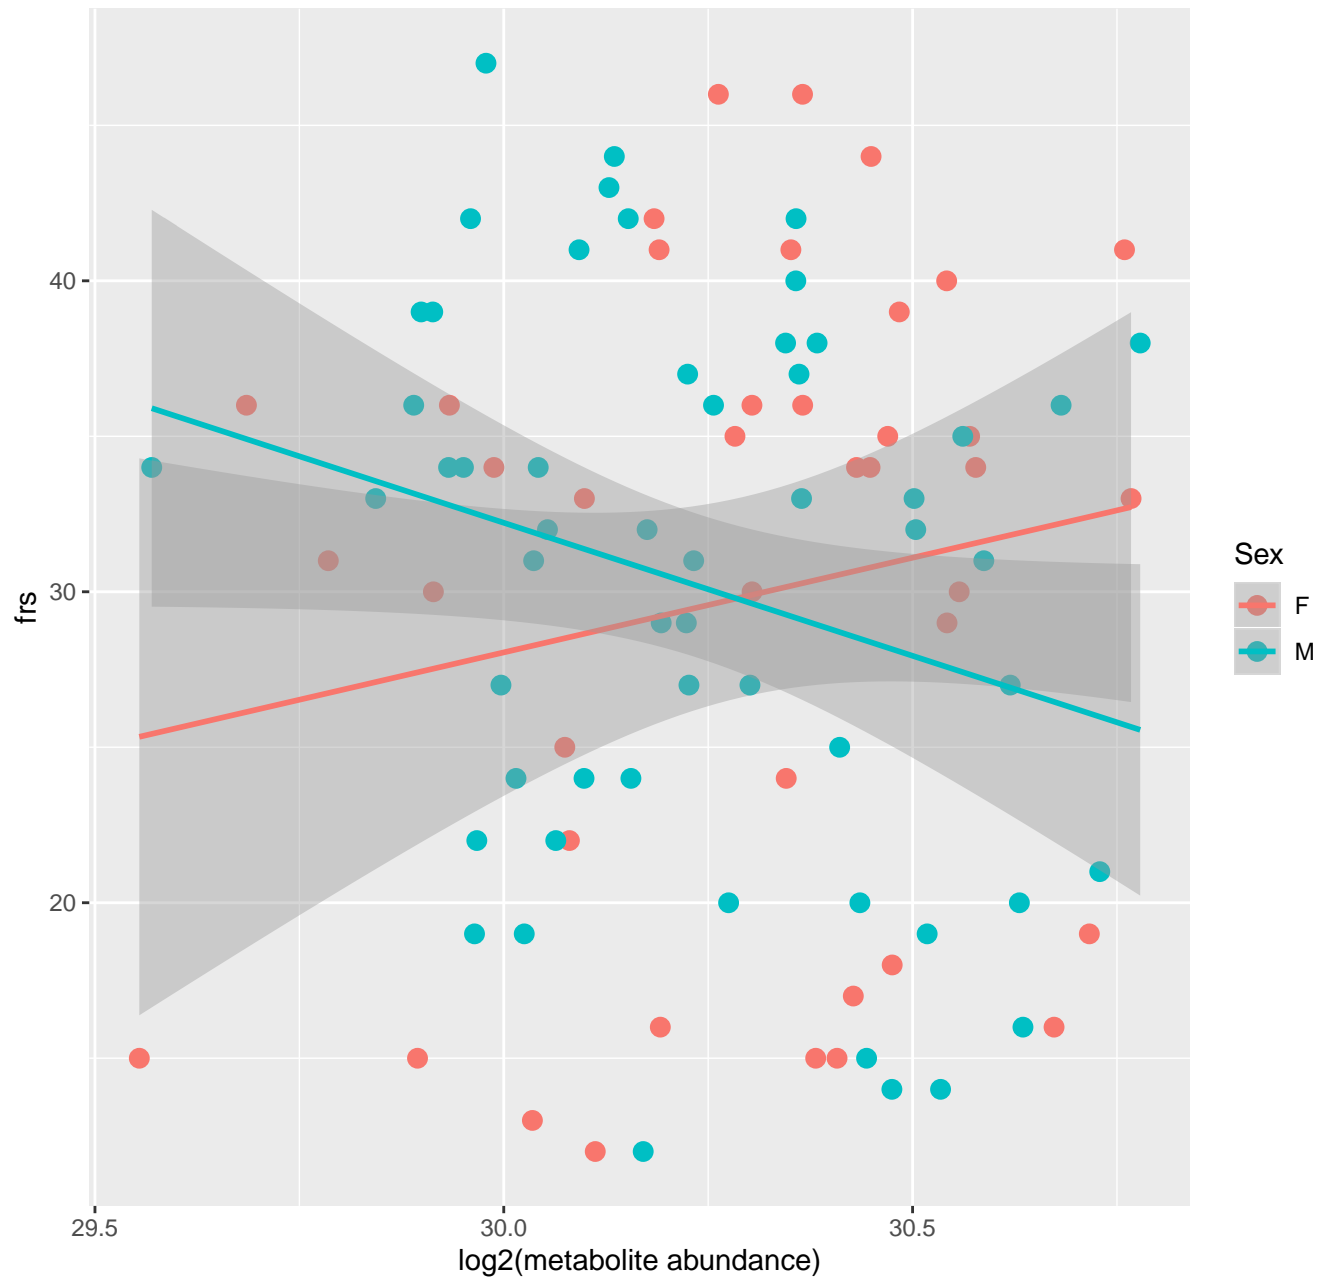

Methionine R2\_F,M = 0.0251 , 0.00345 pval\_F,M = 0.322 , 0.667

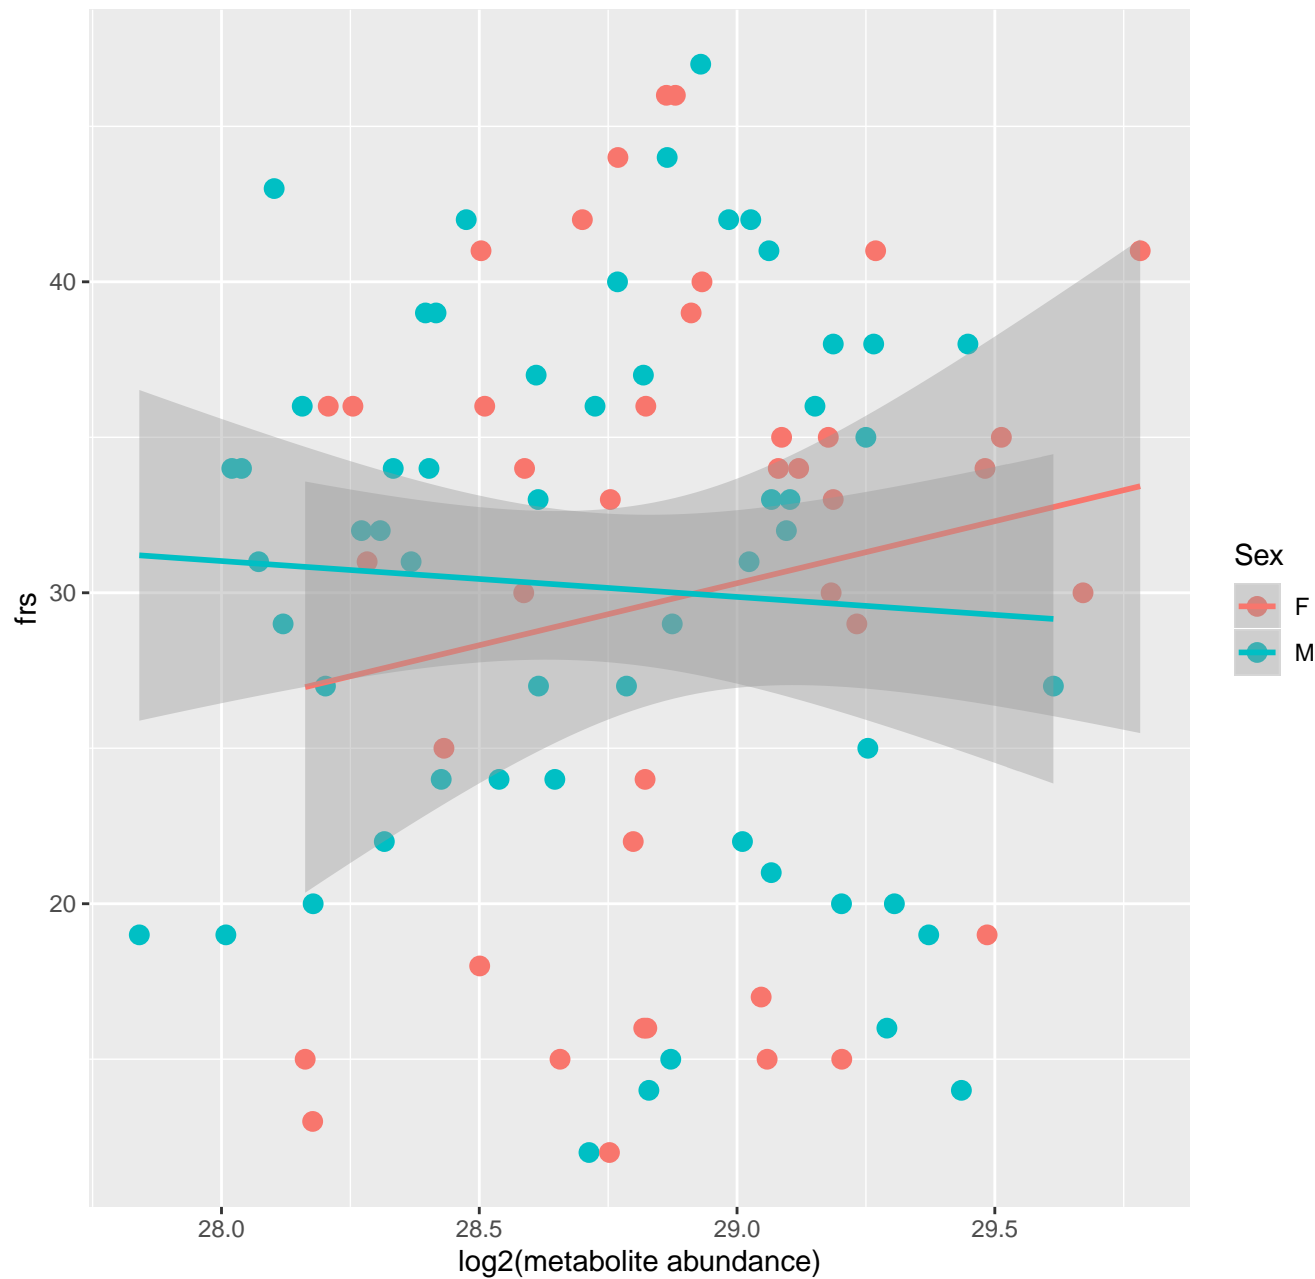

Phenylalanine R2\_F,M = 0.0424 , 4.06e-05 pval\_F,M = 0.196 , 0.963

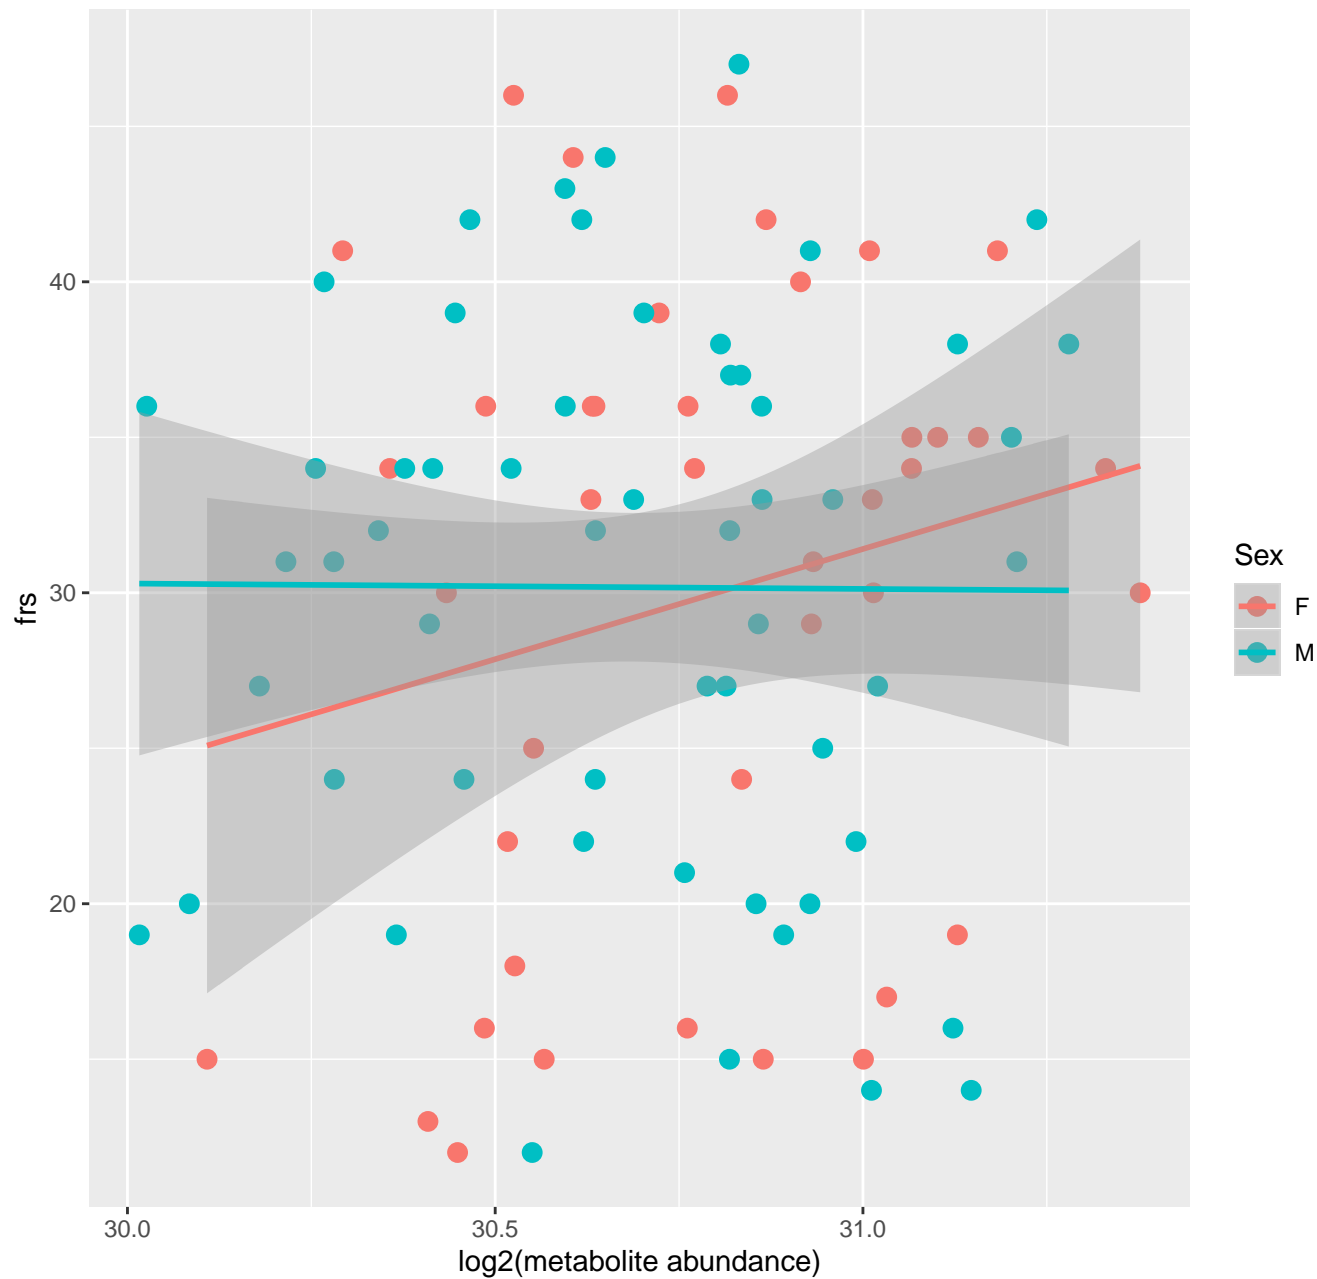

Proline R2\_F,M = 0.0289 , 0.0535 pval\_F,M = 0.288 , 0.0864

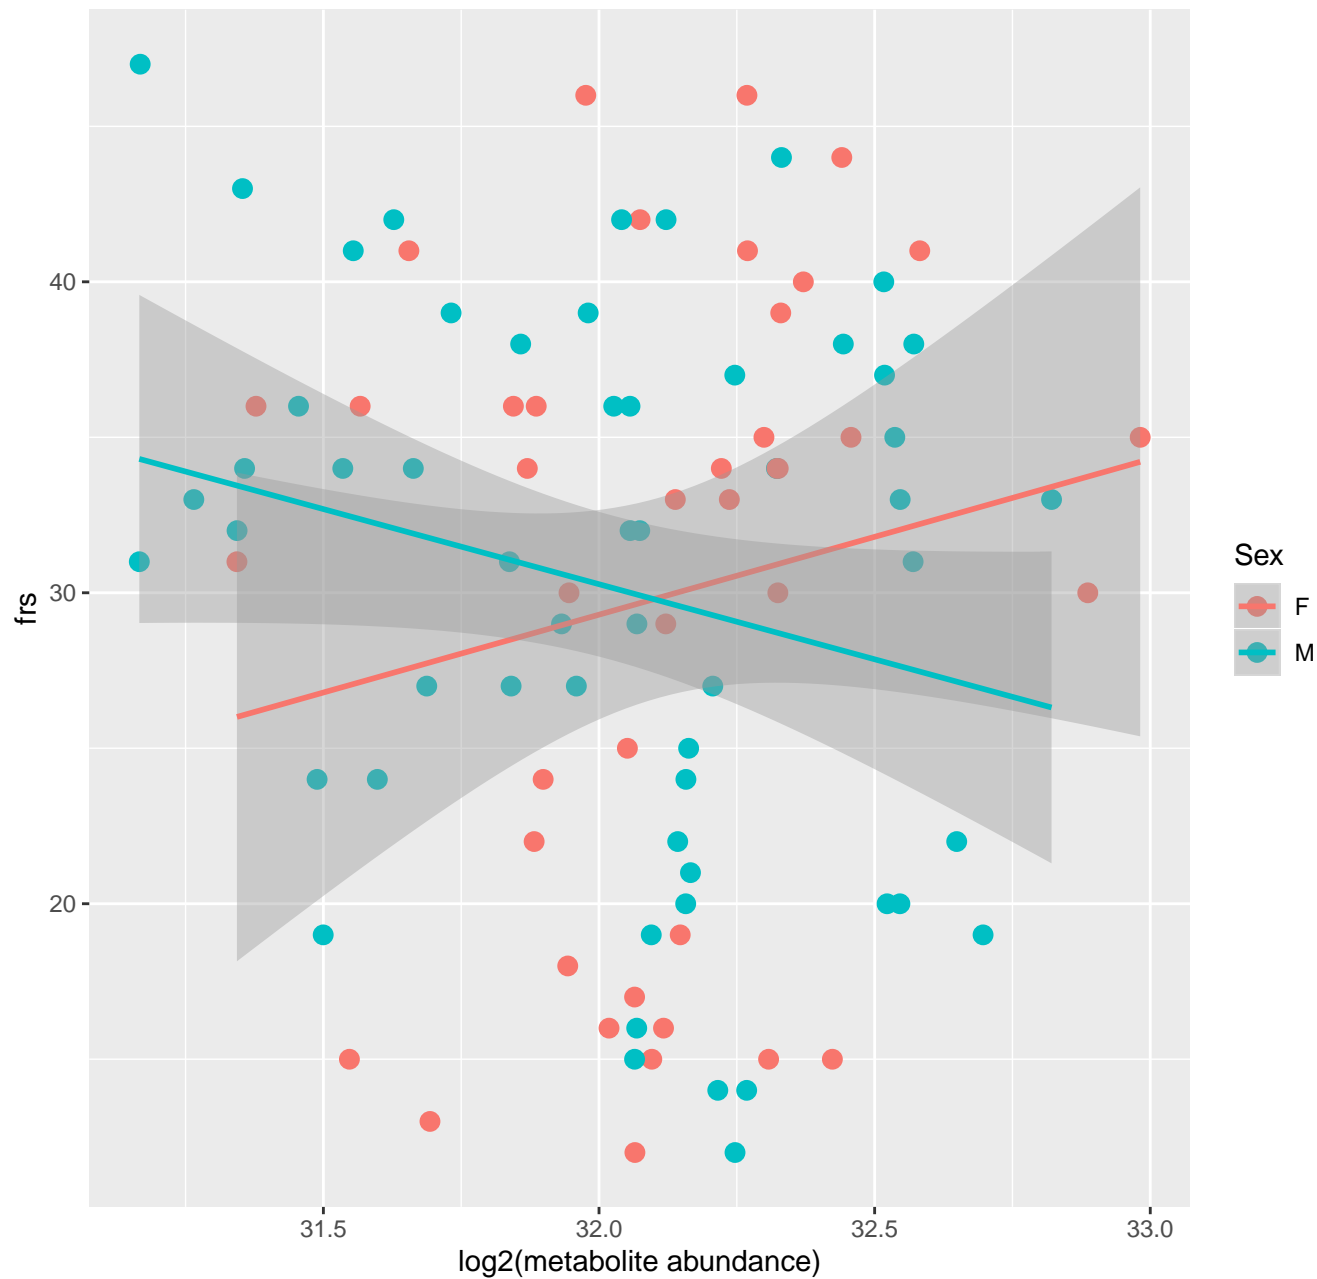

Serine R2\_F,M = 0.0748 , 0.000458 pval\_F,M = 0.0836 , 0.876

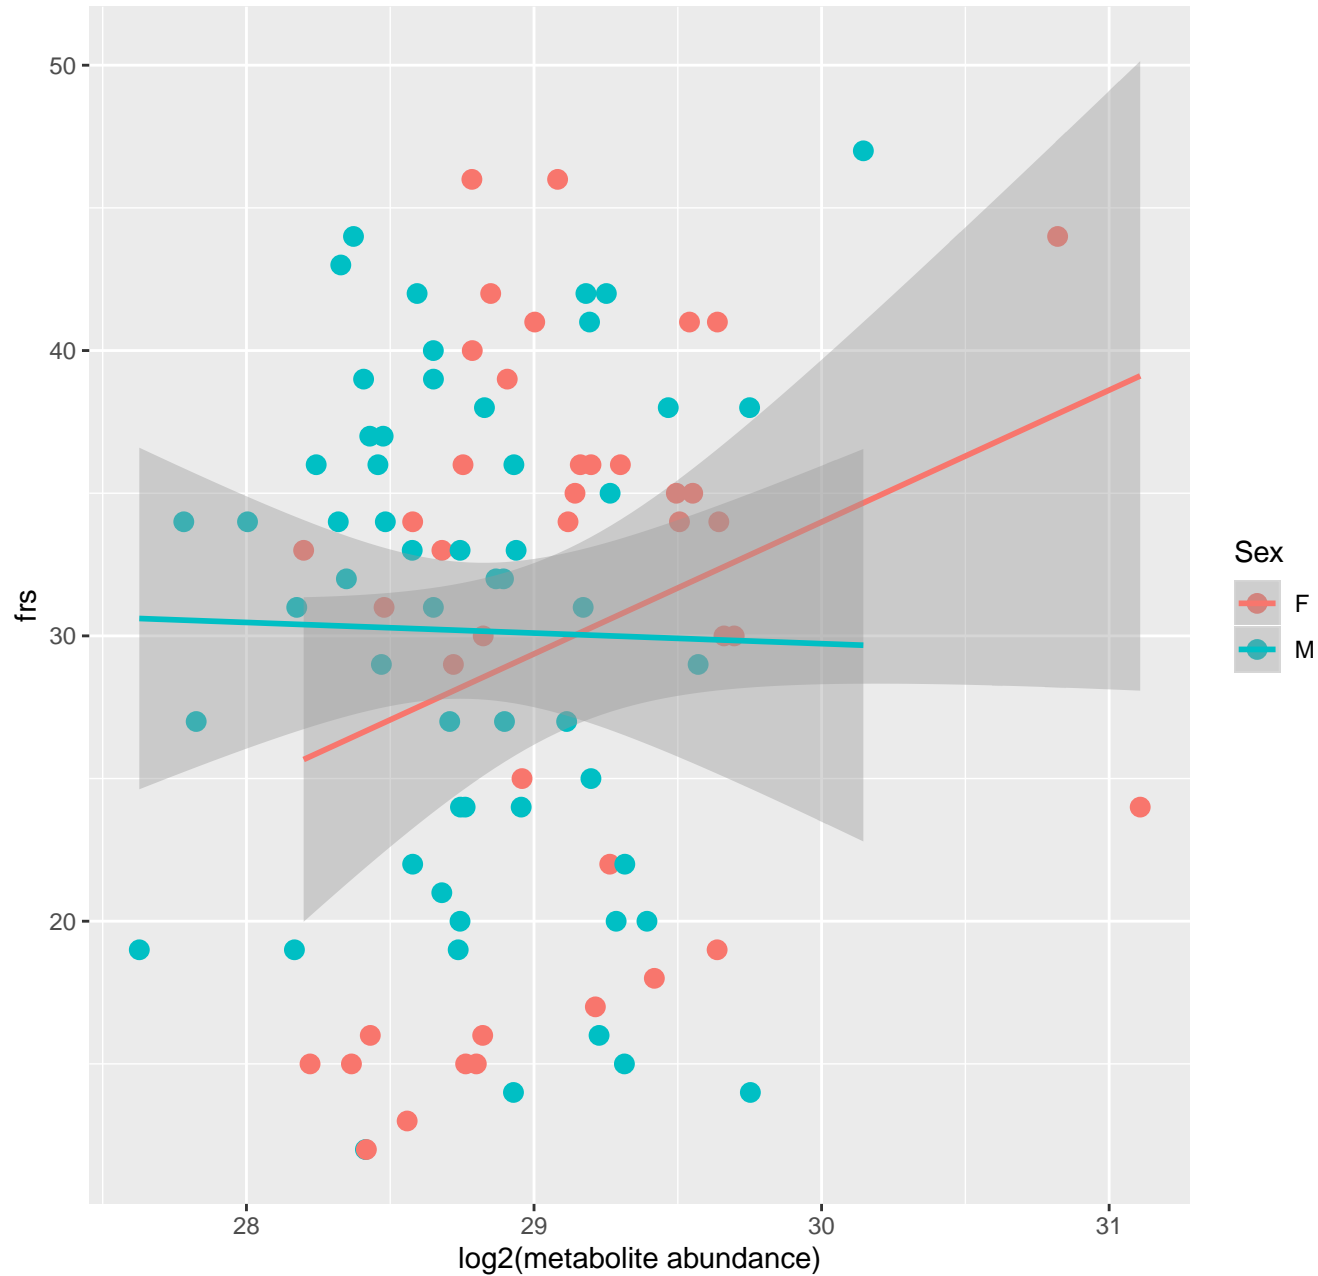



Threonine R2\_F,M = 0.1 , 0.0162 pval\_F,M = 0.0435 , 0.349

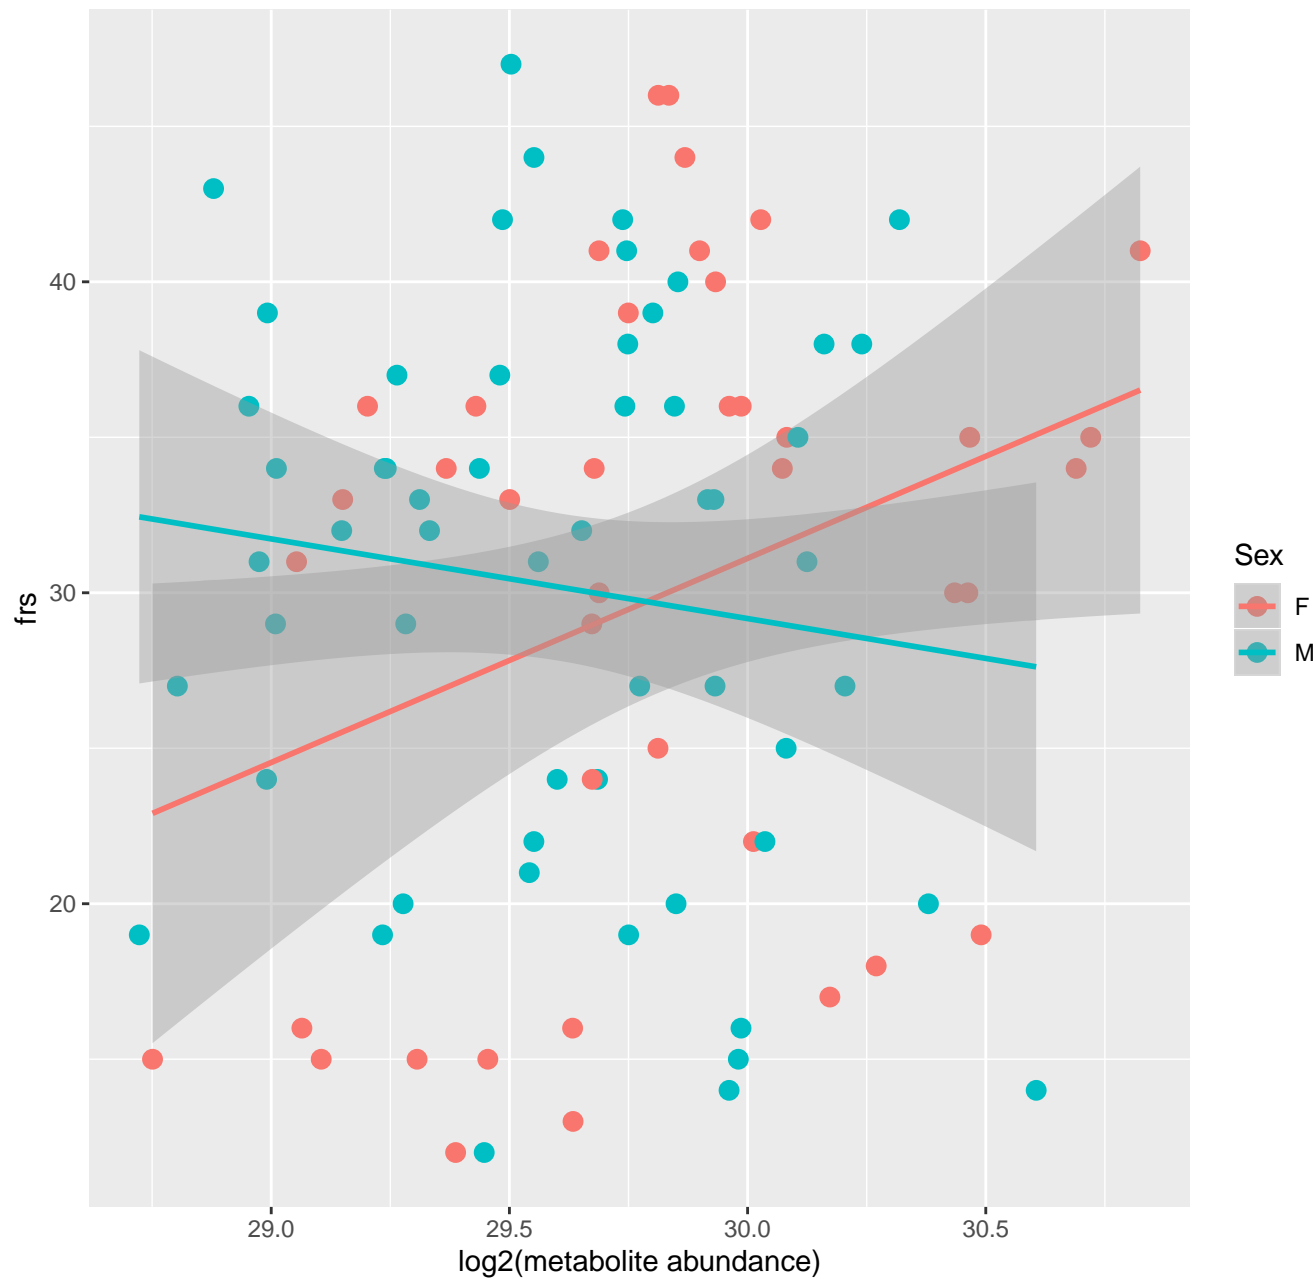

Tryptophan R2\_F,M = 0.0898 , 0.0057 pval\_F,M = 0.057 , 0.58

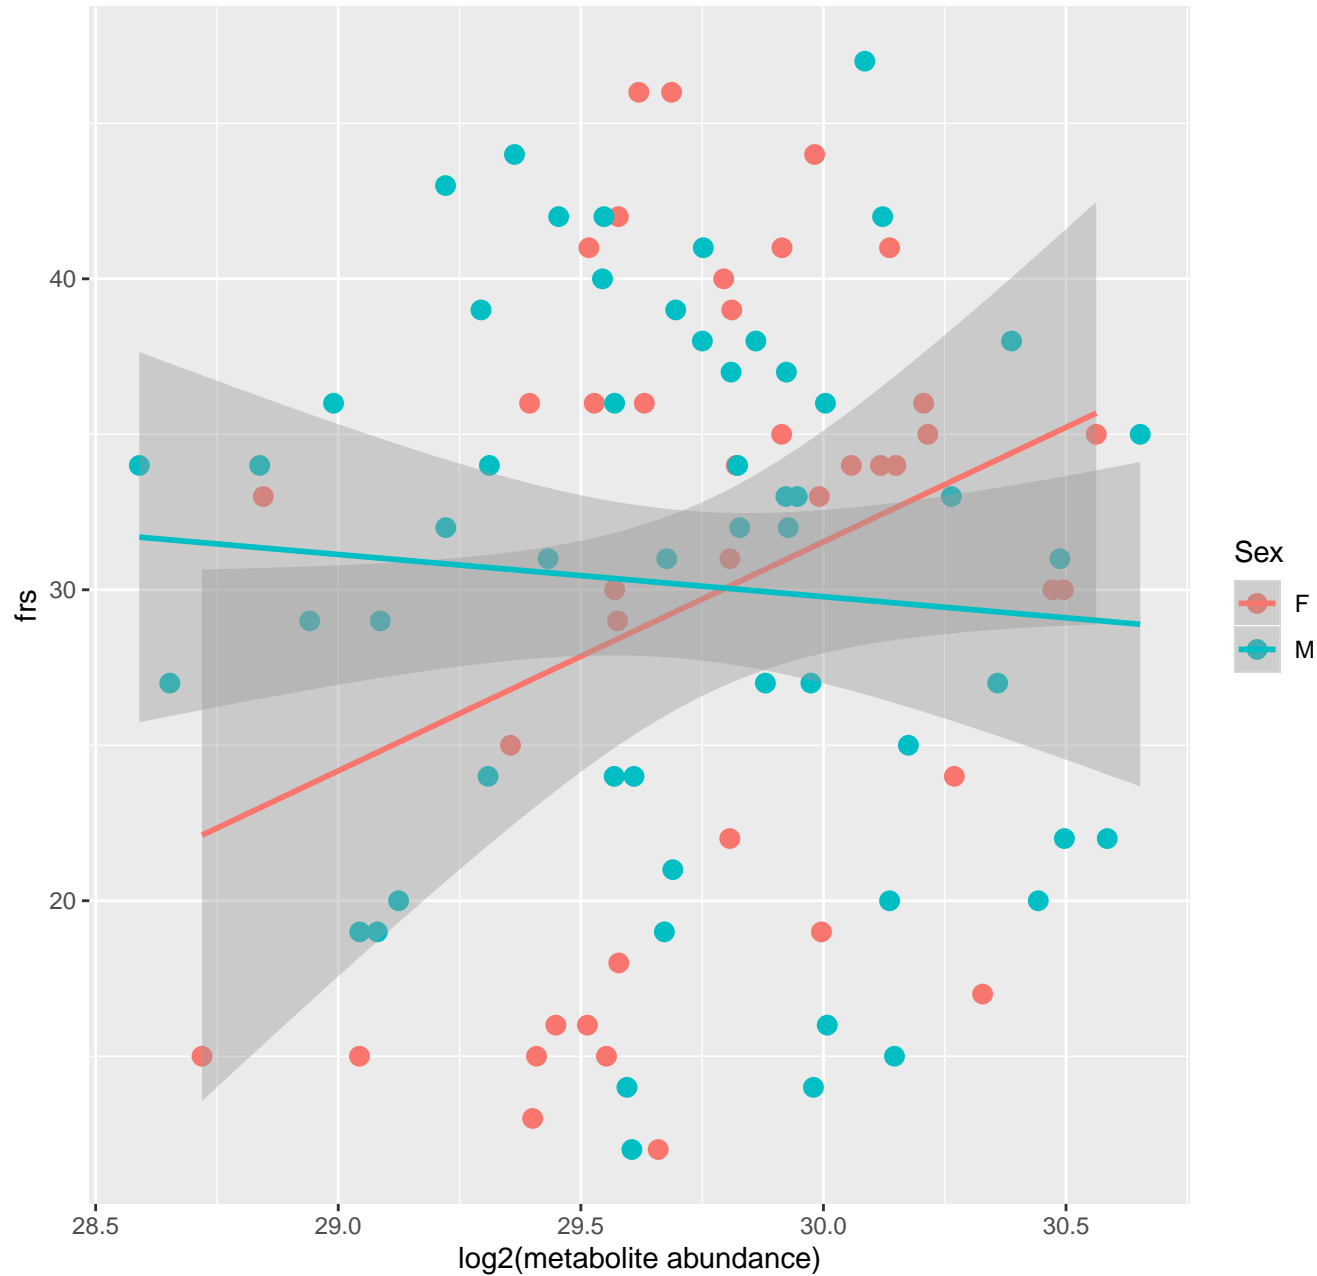

Tyrosine R2\_F,M = 0.0499 , 0.000577 pval\_F,M = 0.16 , 0.861

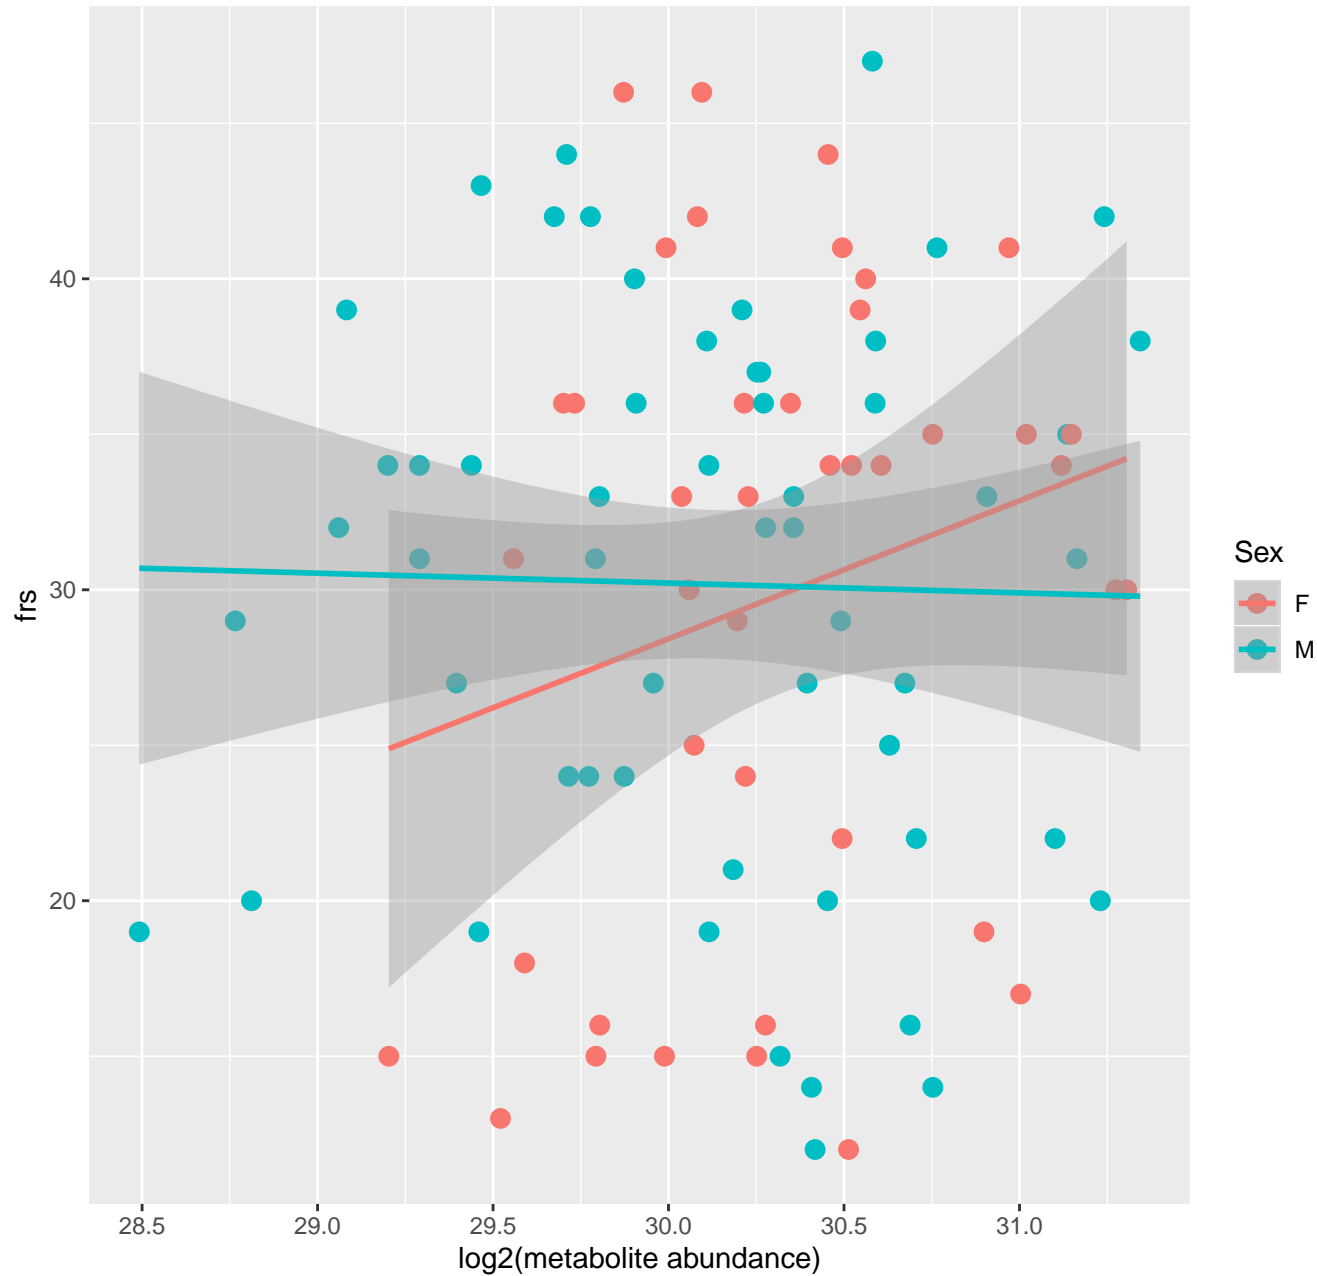

Valine R2\_F,M = 0.0524 , 0.000218 pval\_F,M = 0.15 , 0.914

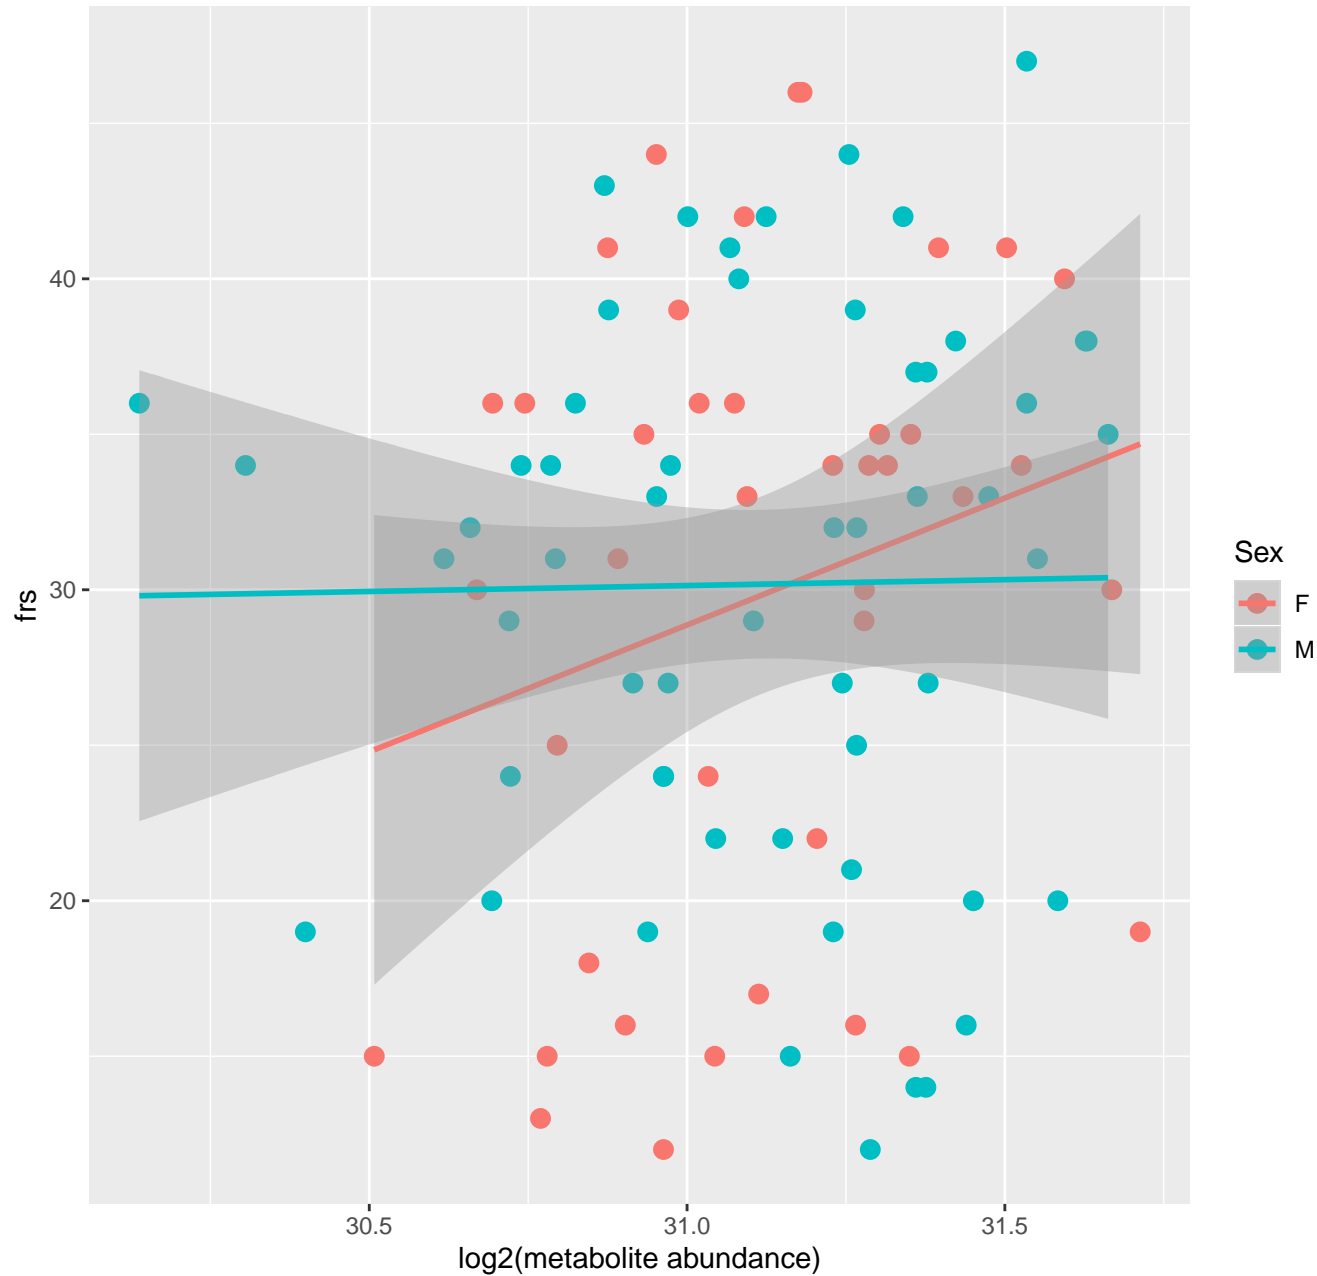

Choline R2\_F,M = 0.0154 , 0.00305 pval\_F,M = 0.44 , 0.686

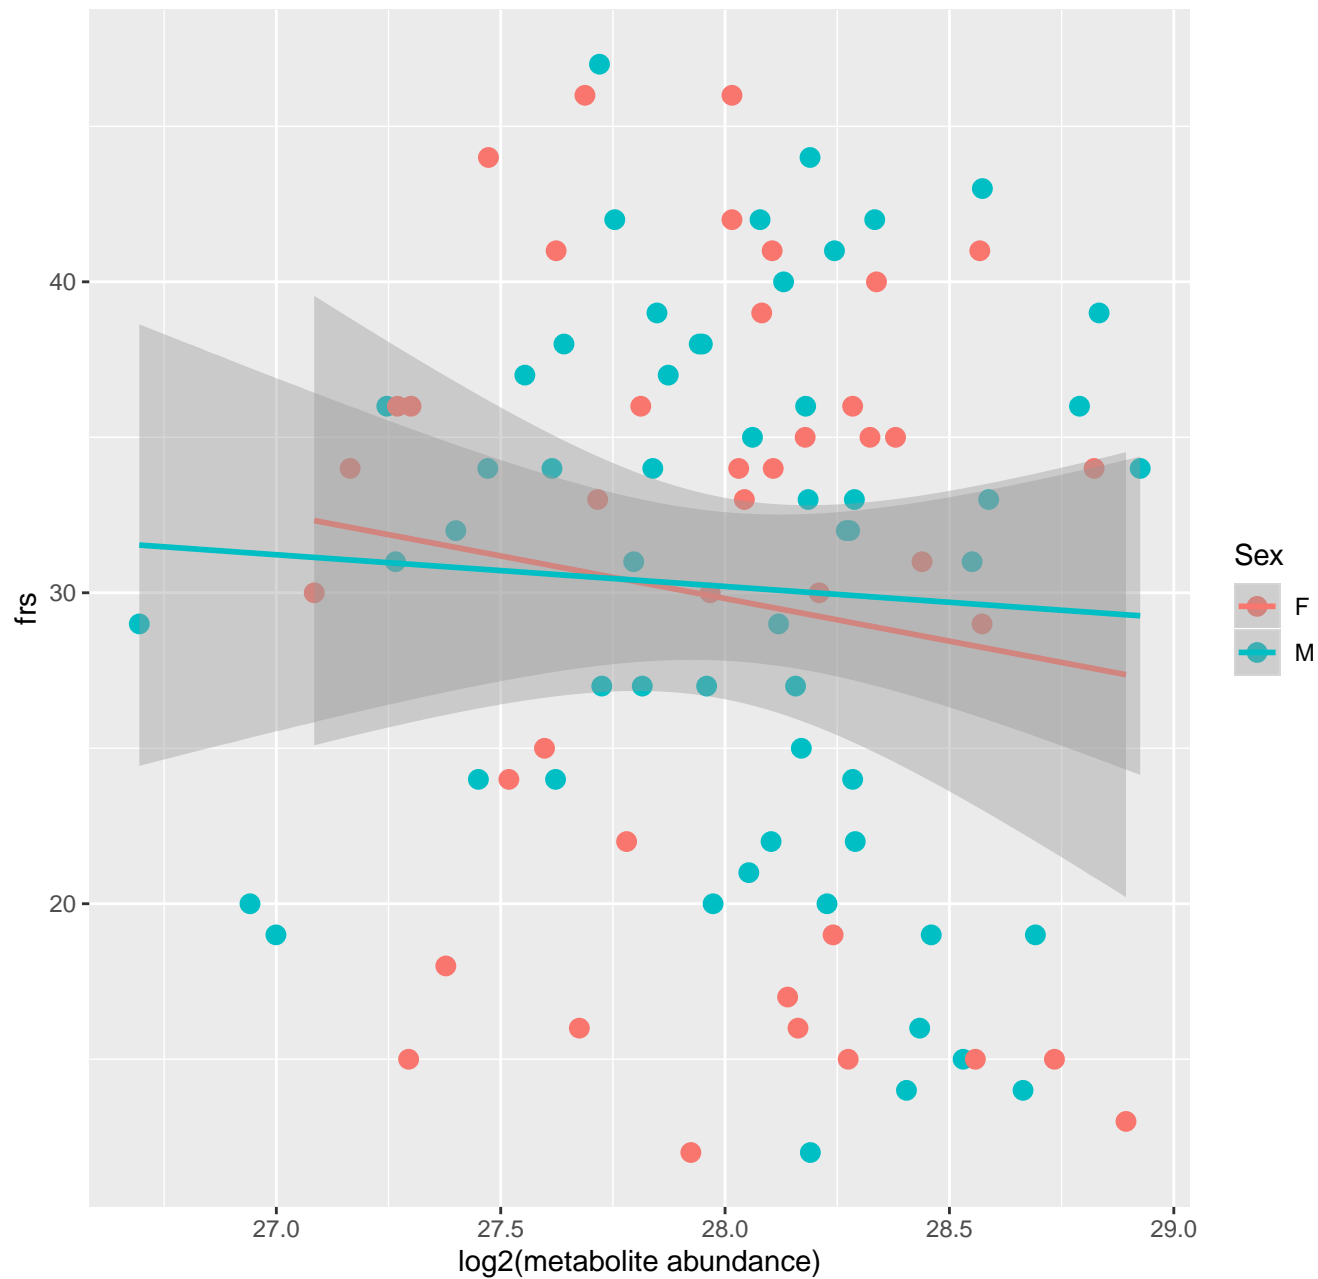

Betaine R2\_F,M = 0.00337 , 0.0593 pval\_F,M = 0.719 , 0.0705

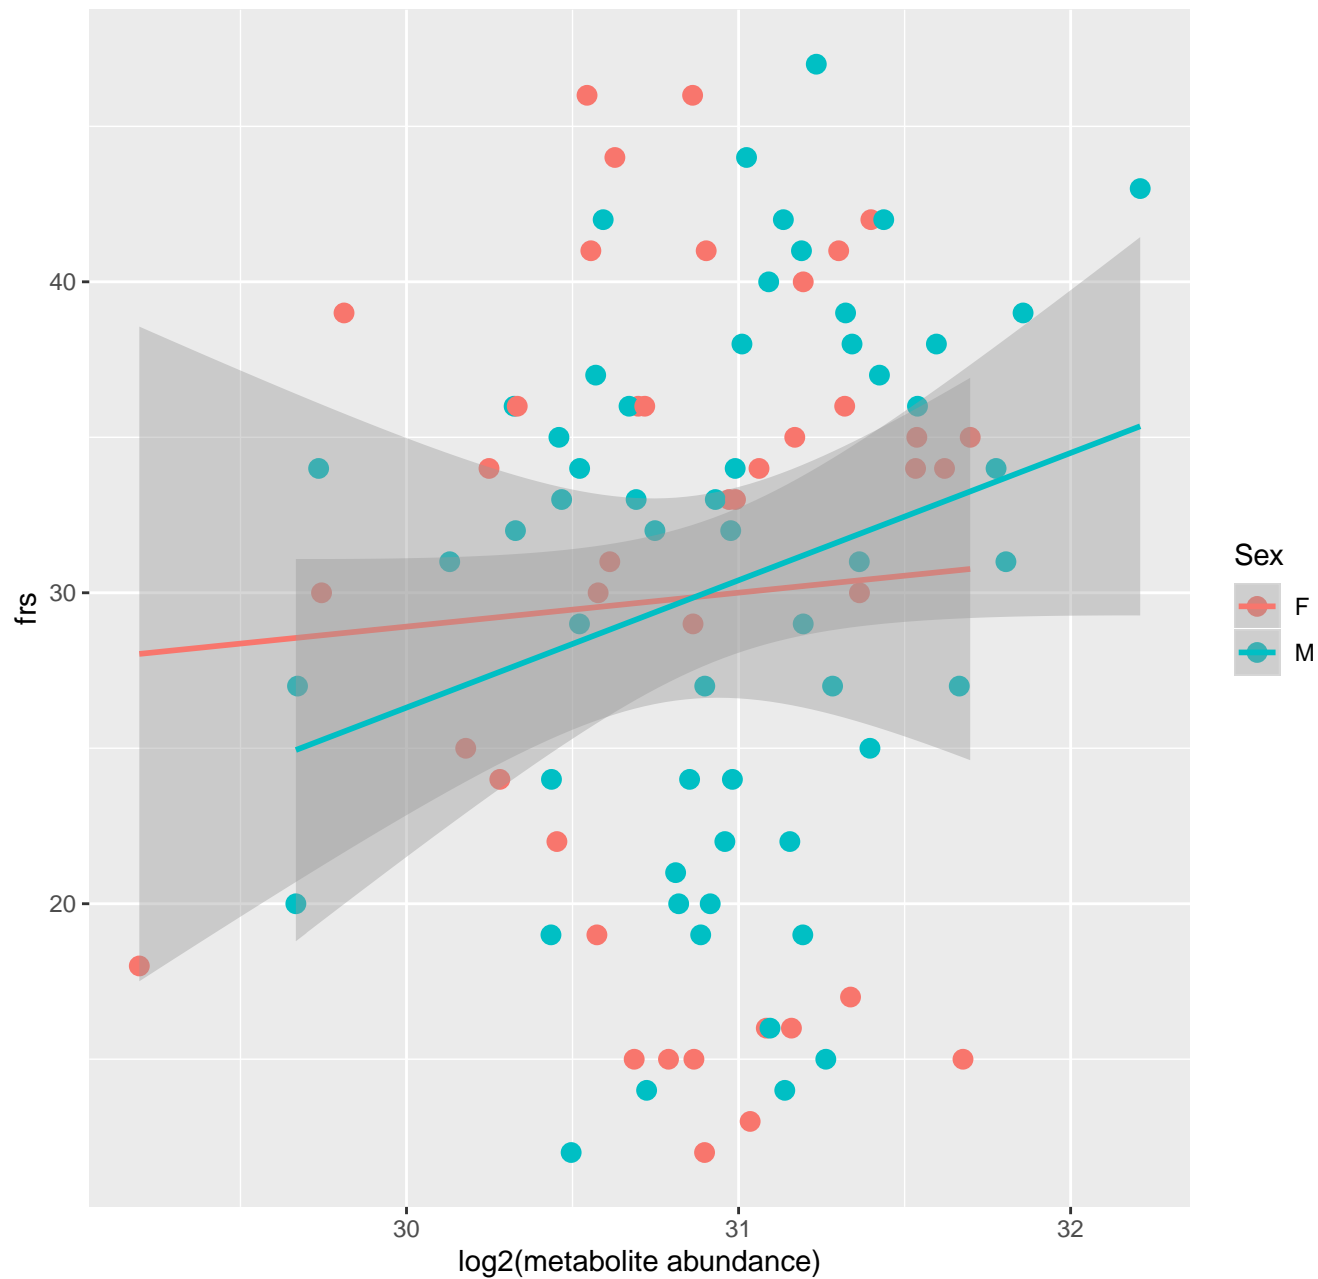

Creatinine R2\_F,M = 0.177 , 0.149 pval\_F,M = 0.00619 , 0.00328

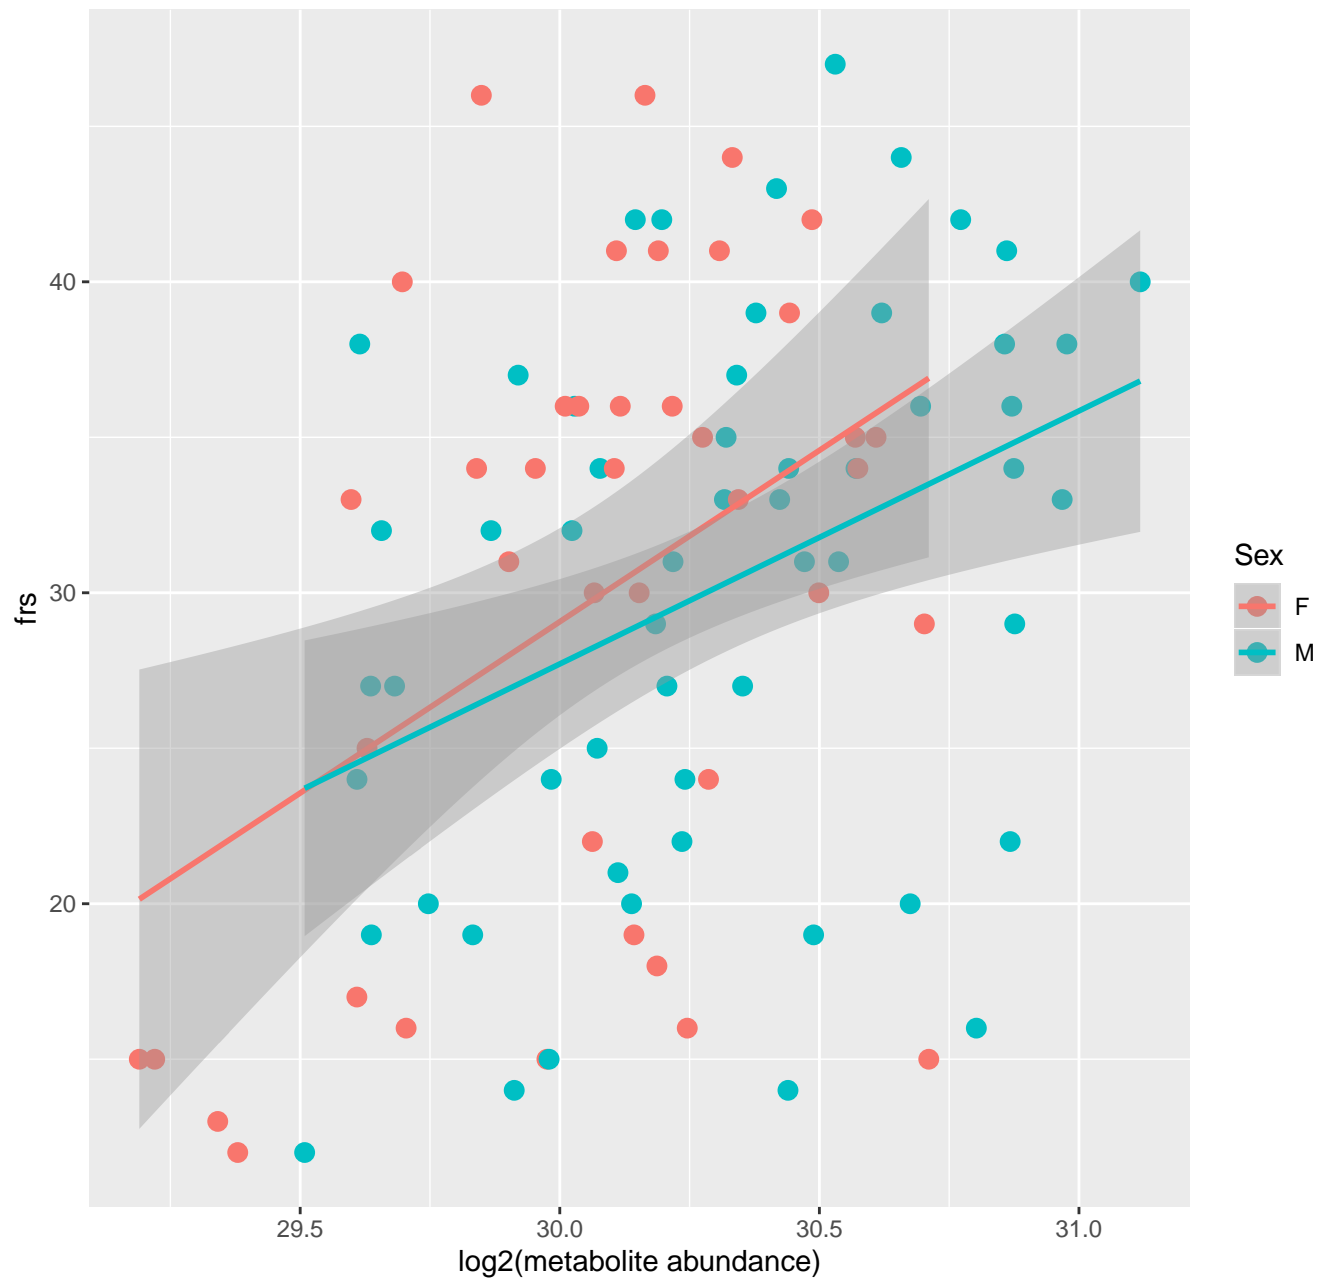

Creatine R2\_F,M = 0.0297 , 0.137 pval\_F,M = 0.281 , 0.00504

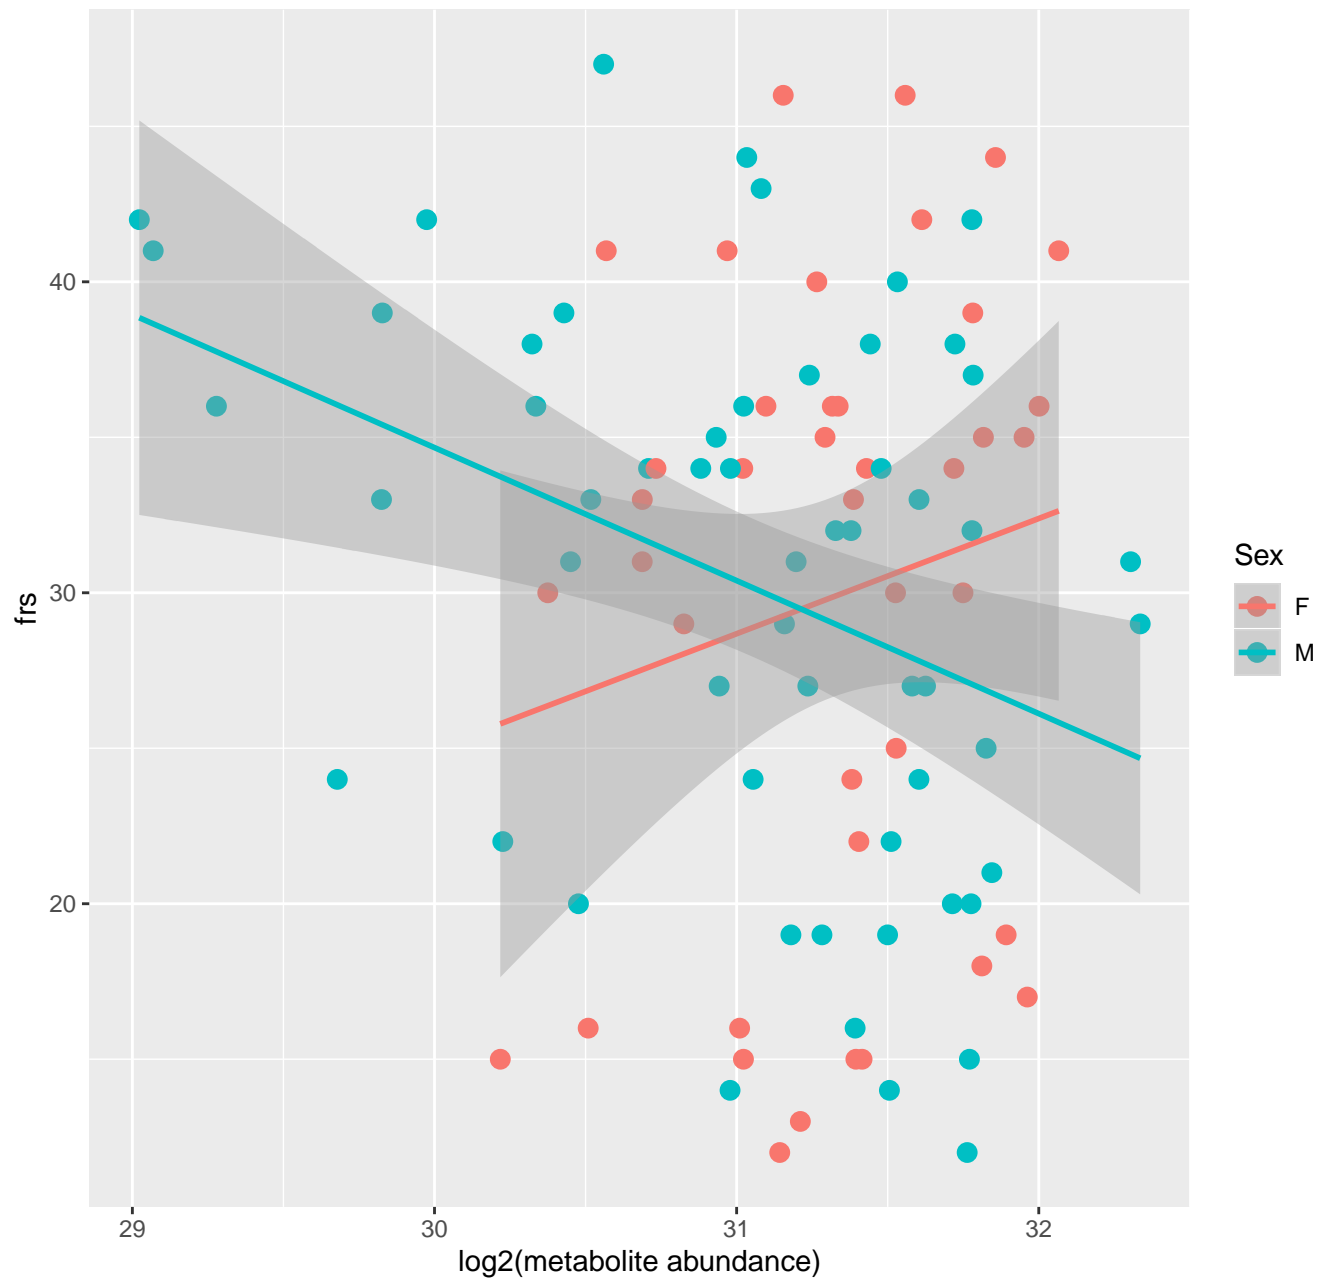



Carnitine R2\_F,M = 0.181 , 0.0315 pval\_F,M = 0.00555 , 0.191

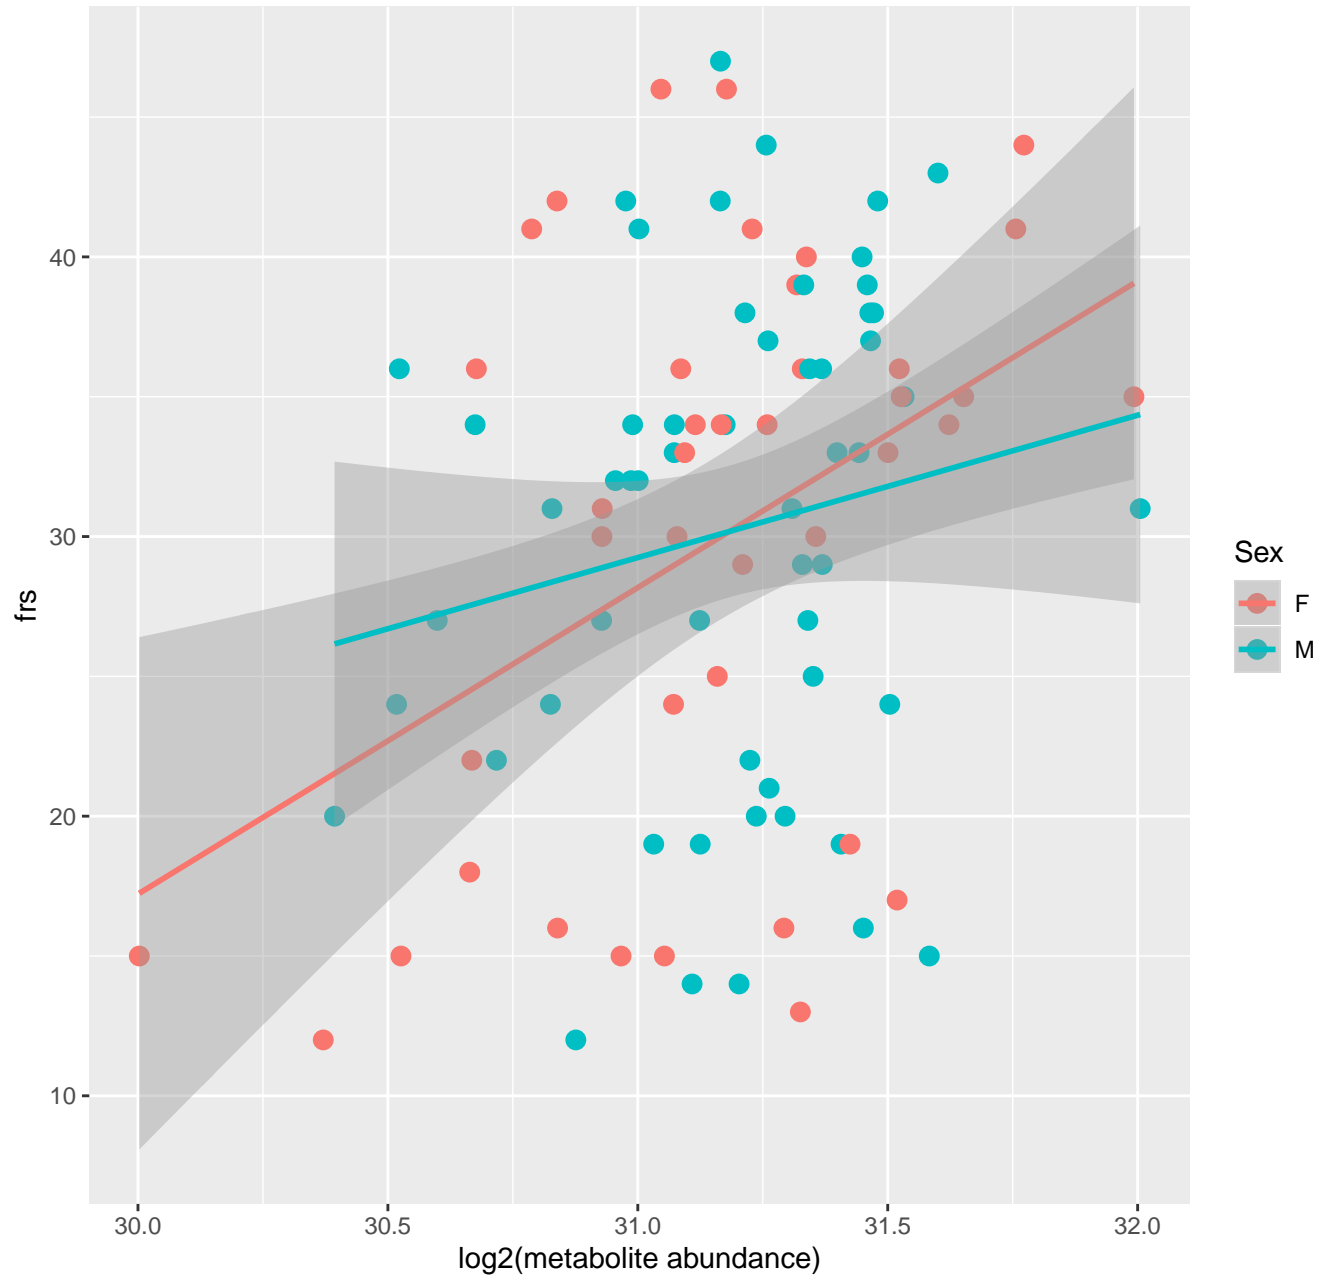

Methylhistidine R2\_F,M = 0.25 , 0.117 pval\_F,M = 0.000883 , 0.00976

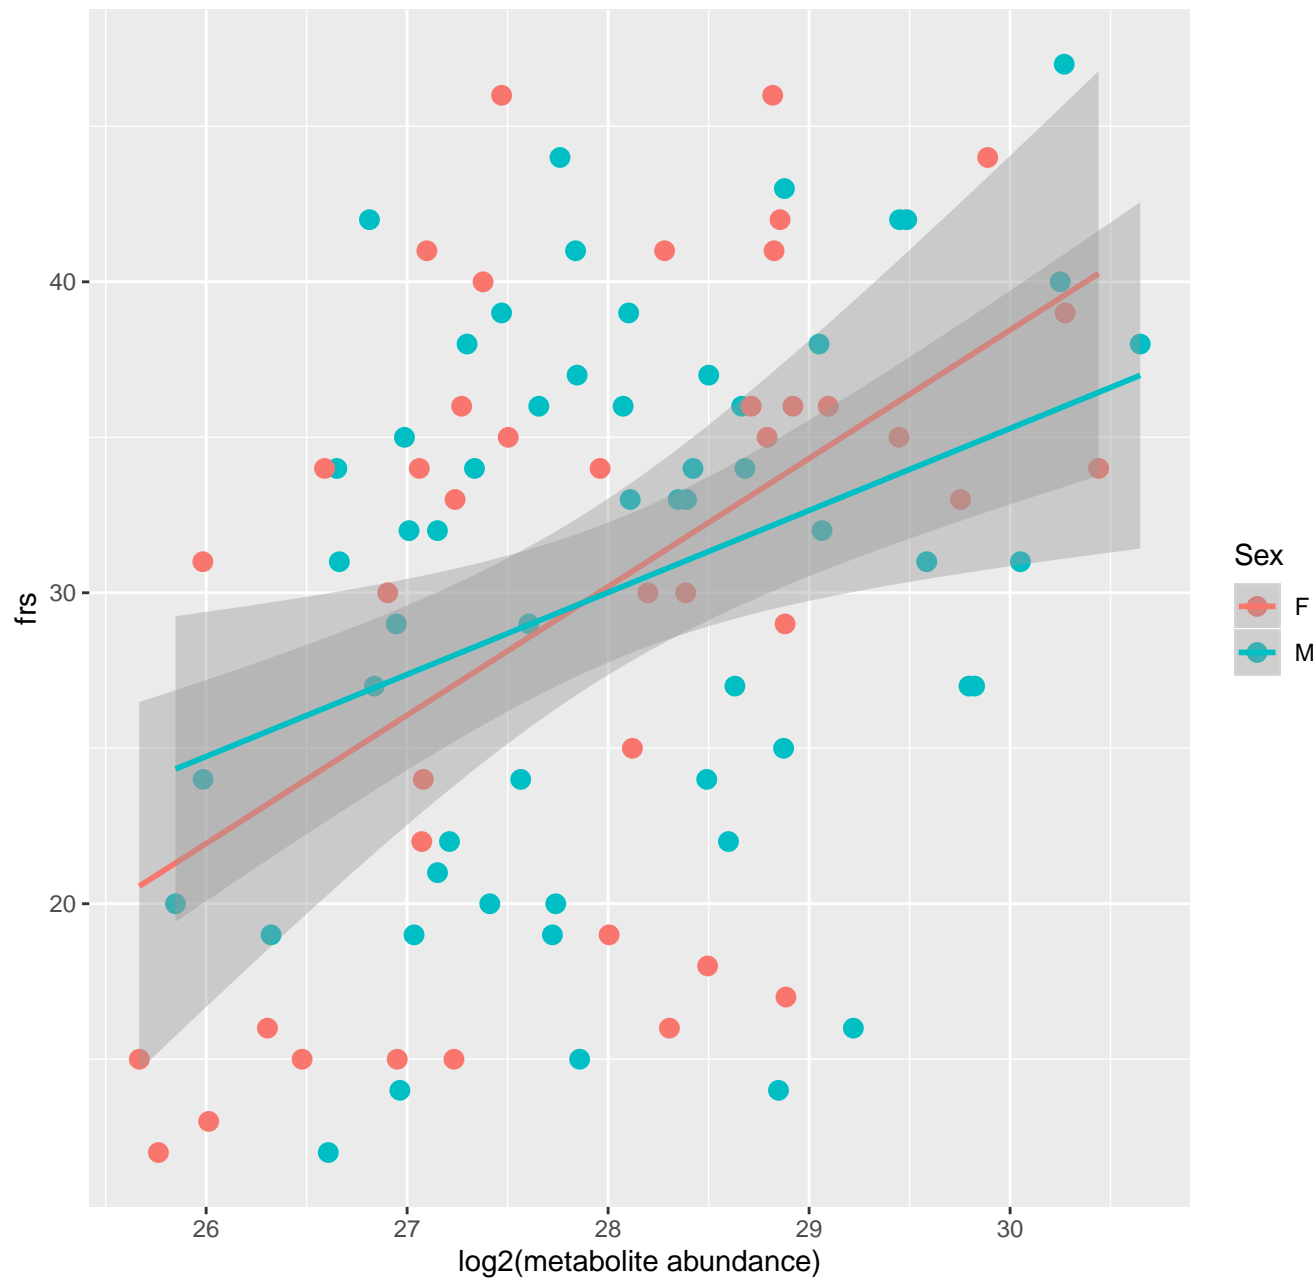

Citrulline R2\_F,M = 0.0666 , 0.000175 pval\_F,M = 0.103 , 0.923

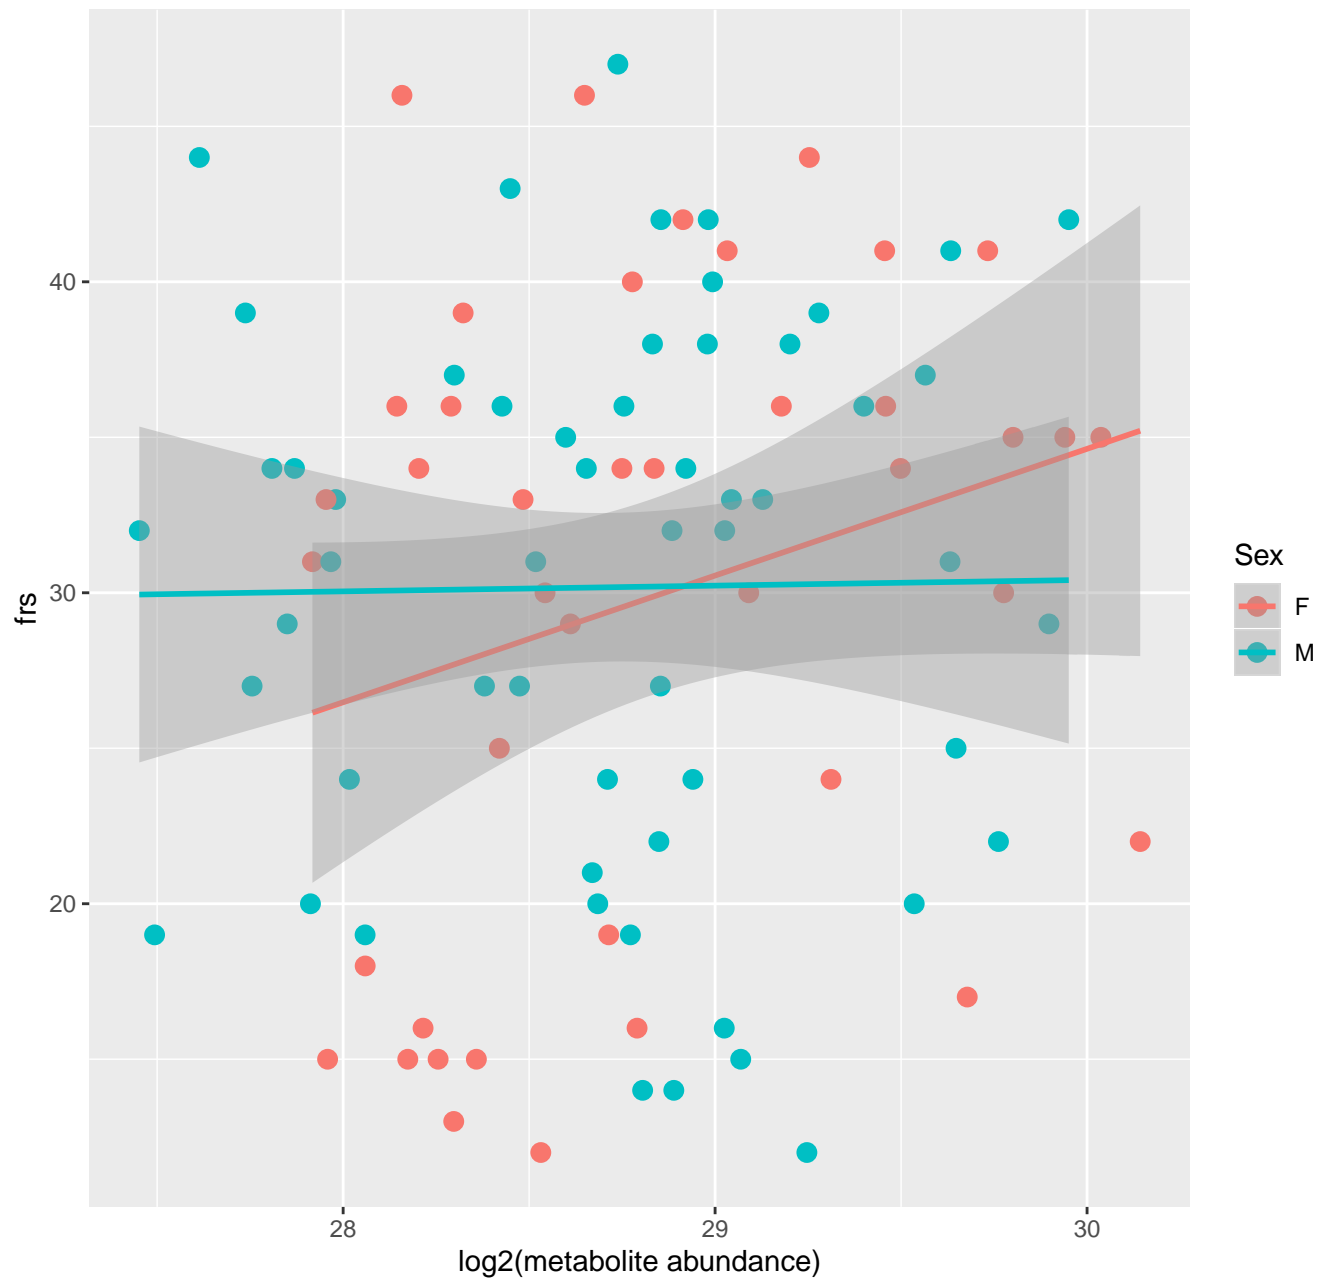

Dihydrothymine R2\_F,M = 0.0447 , 0.121 pval\_F,M = 0.184 , 0.00863

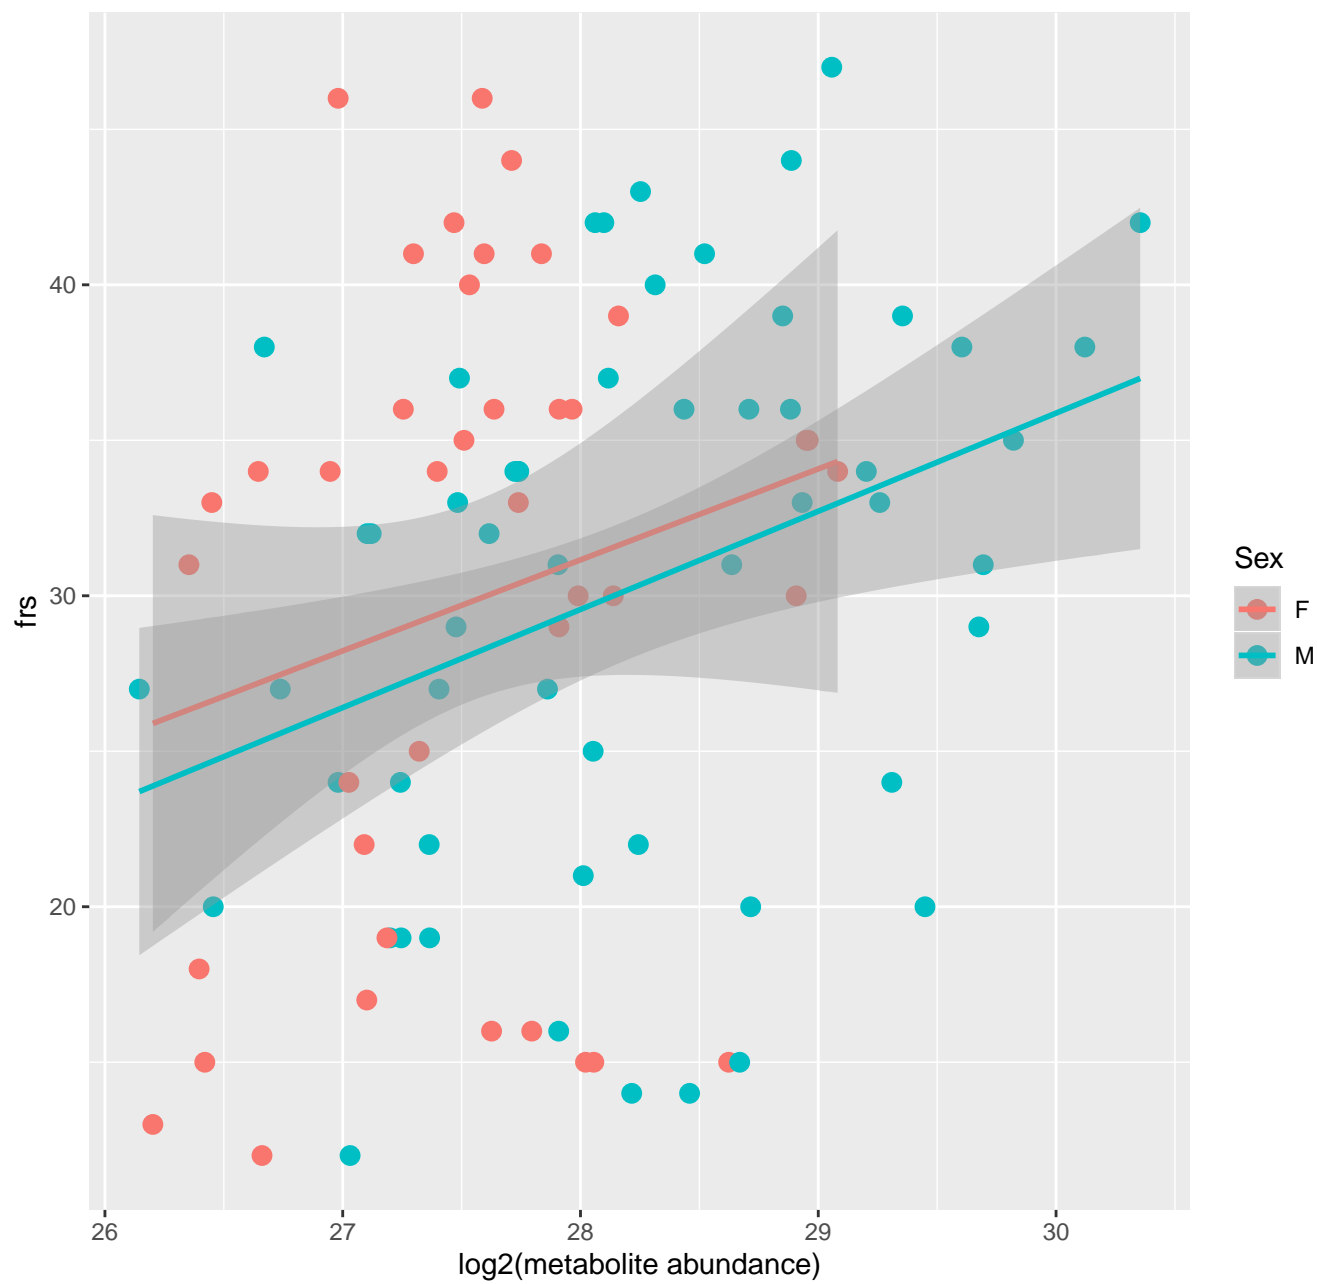

Acetylcarnitine R2\_F,M = 0.157 , 0.0663 pval\_F,M = 0.0104 , 0.0554

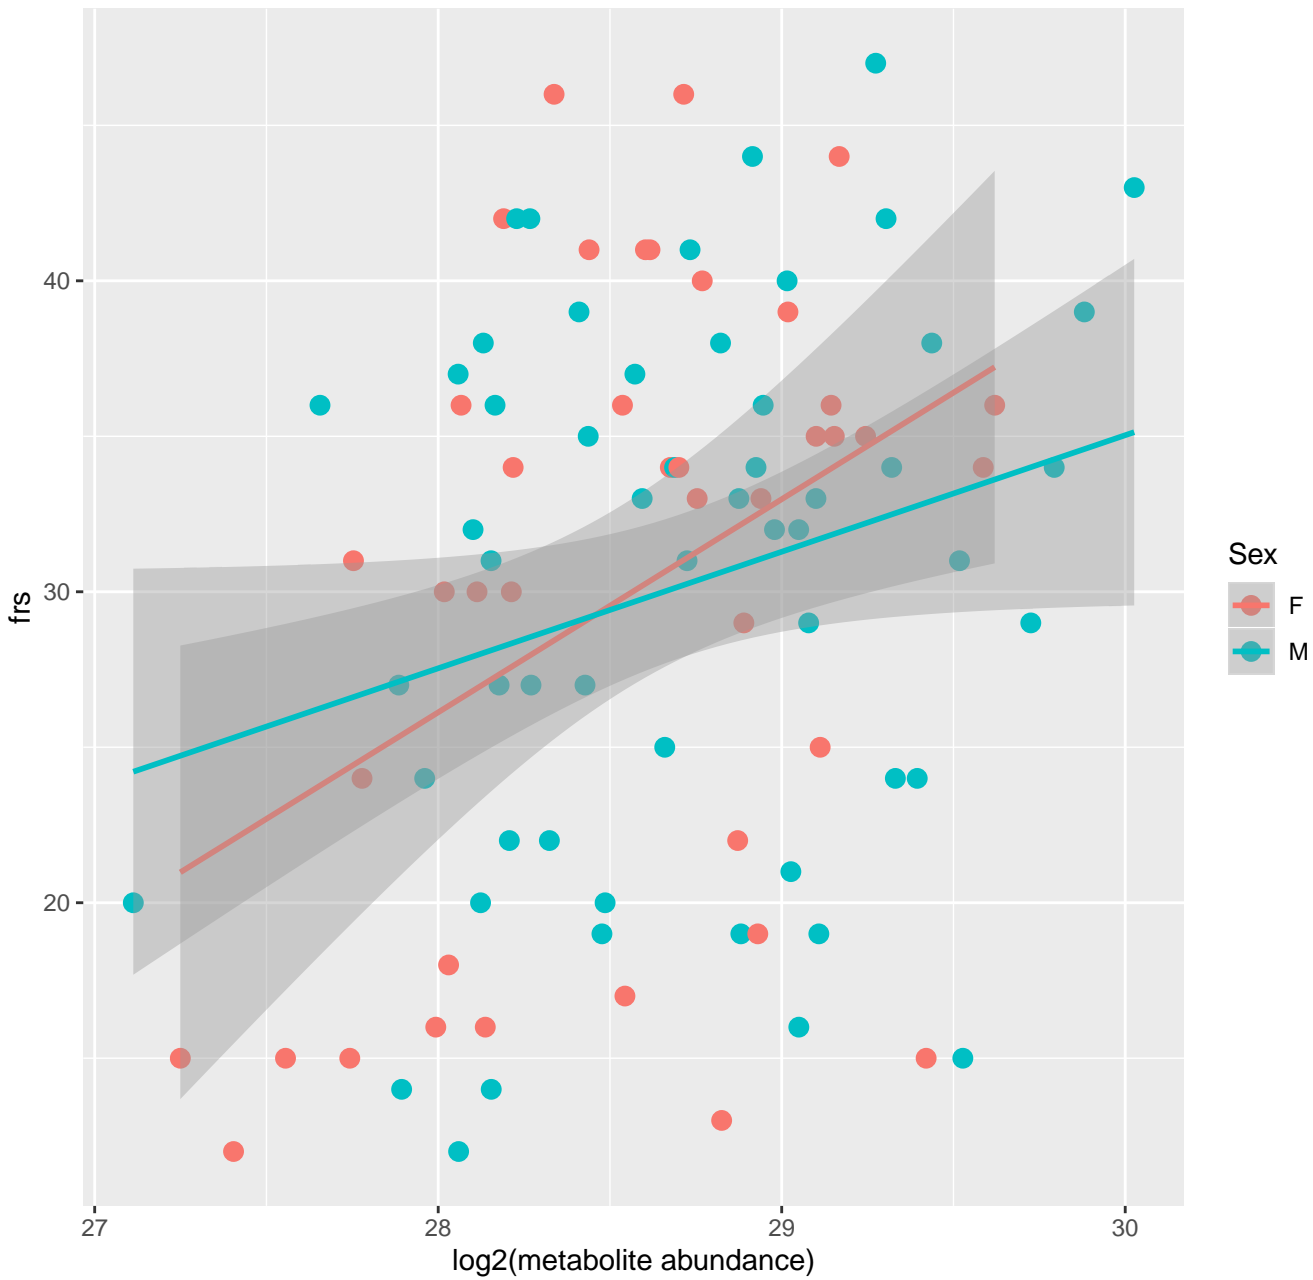

Pyroglutamic.Acid R2\_F,M = 0.0455 , 6.82e-08 pval\_F,M = 0.181 , 0.998

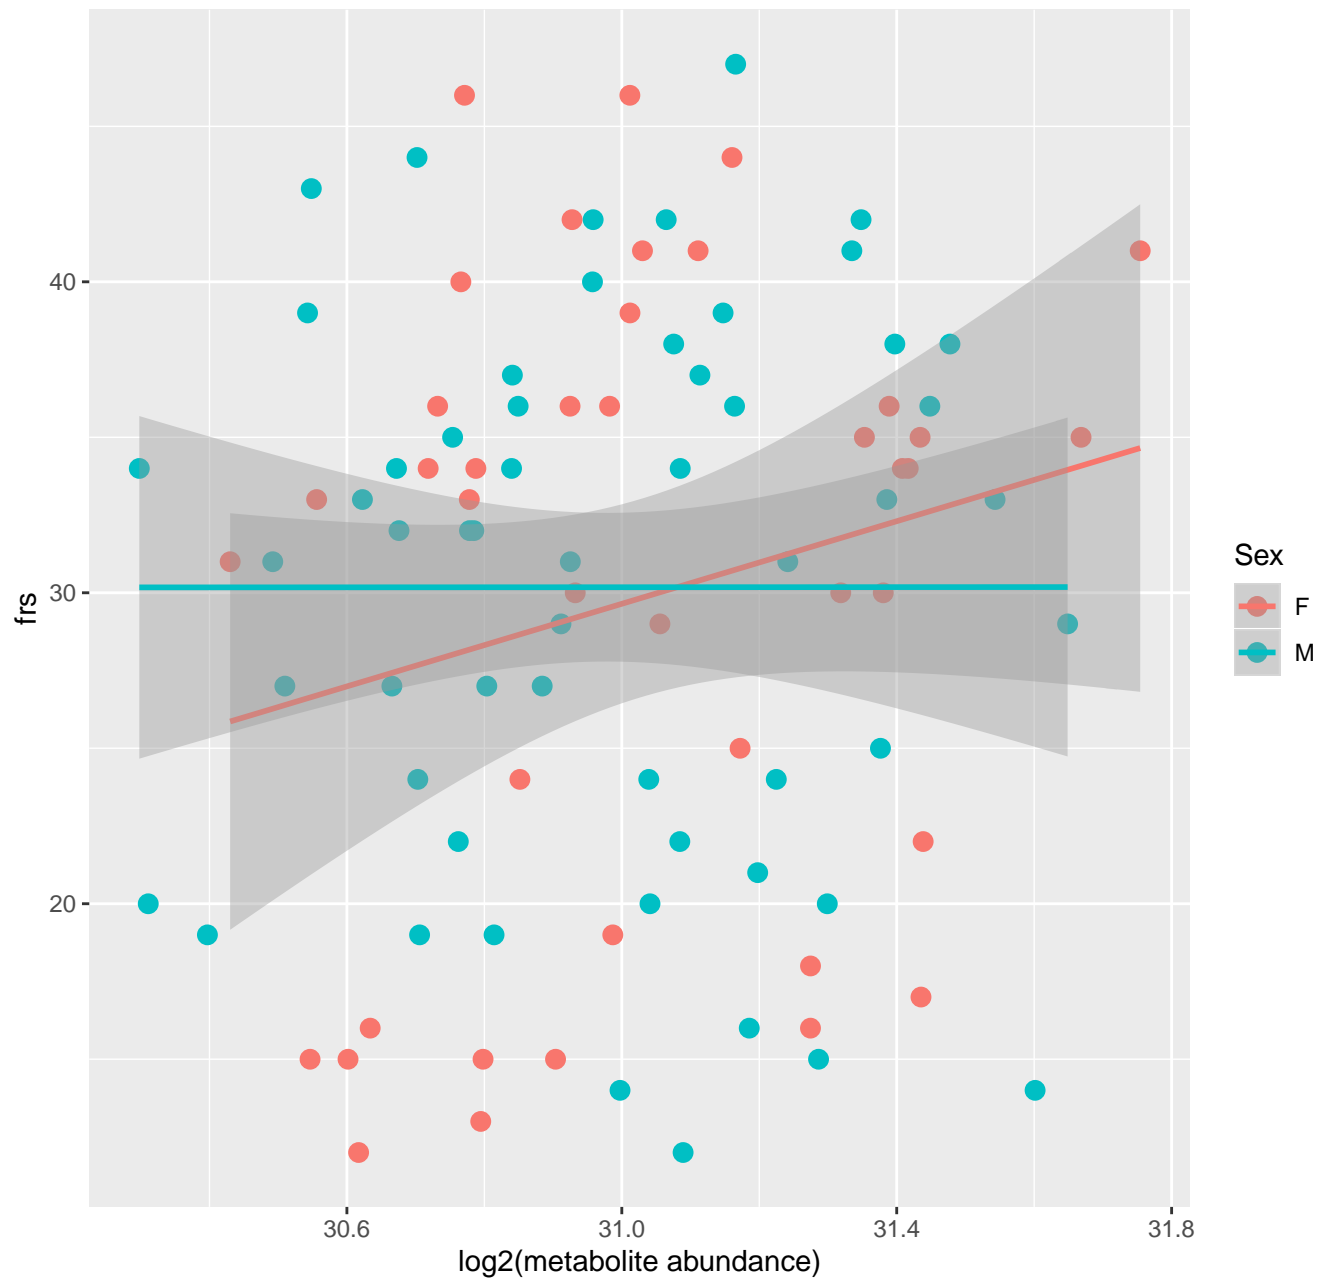

Stachydrine R2\_F,M = 0.146 , 0.154 pval\_F,M = 0.0139 , 0.00282

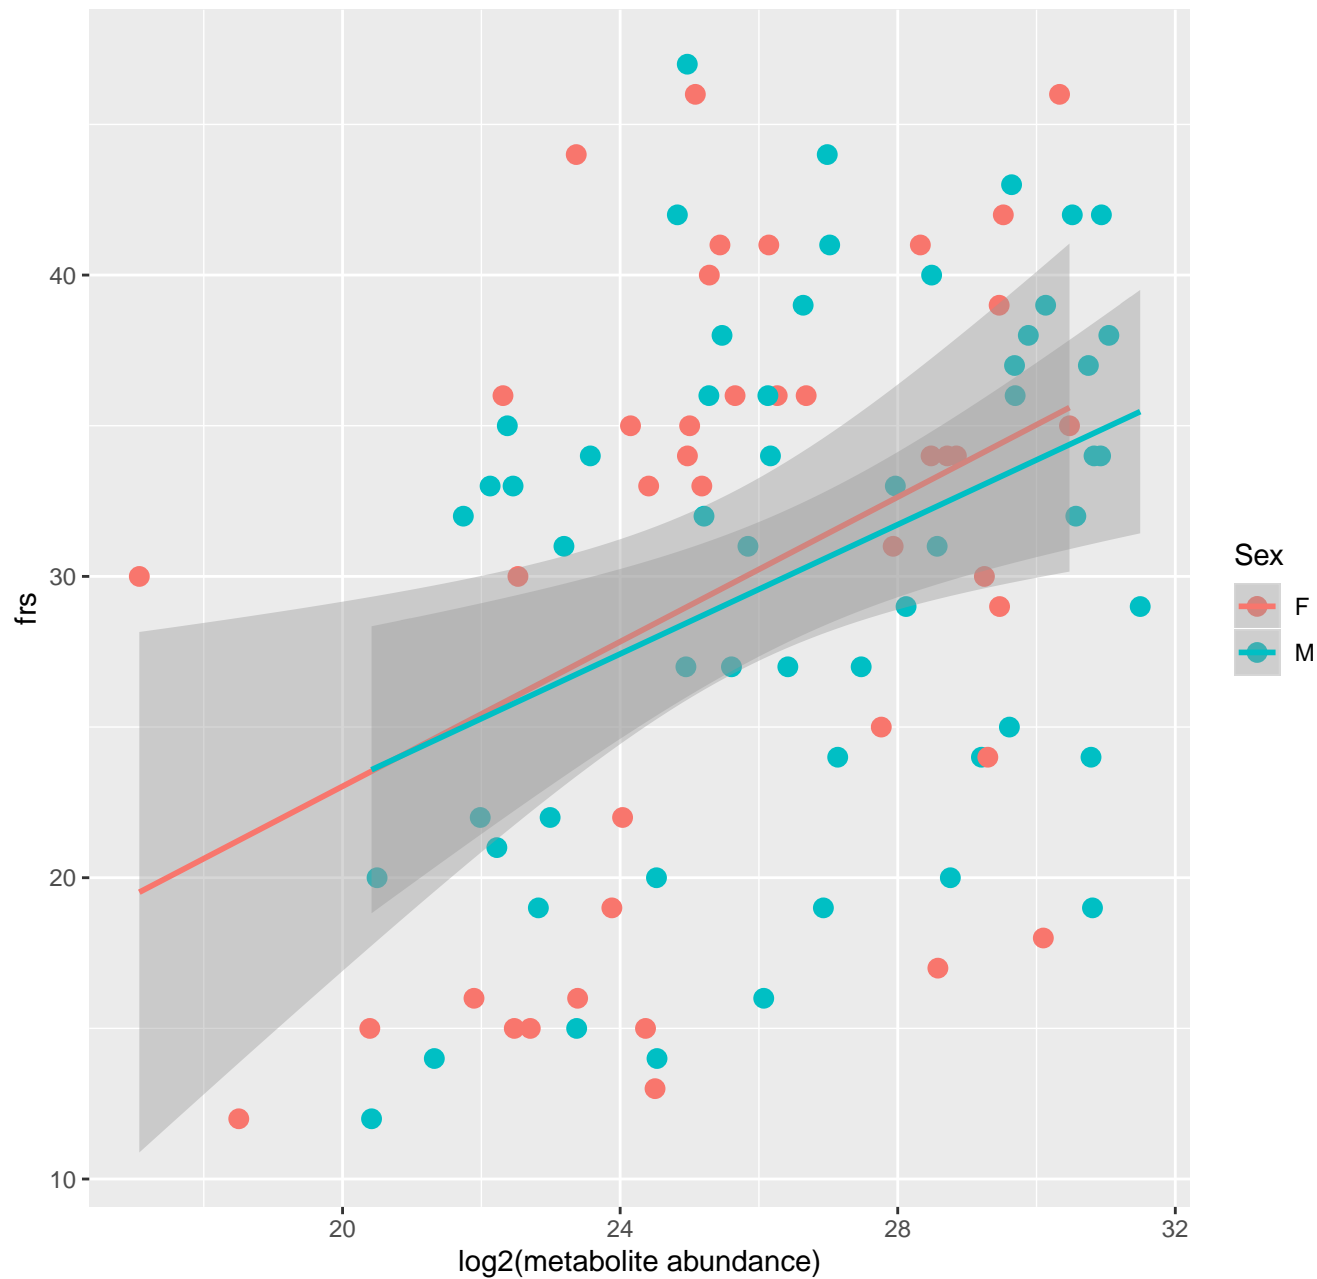

Hydroxyproline R2\_F,M = 0.117 , 0.0143 pval\_F,M = 0.0286 , 0.38

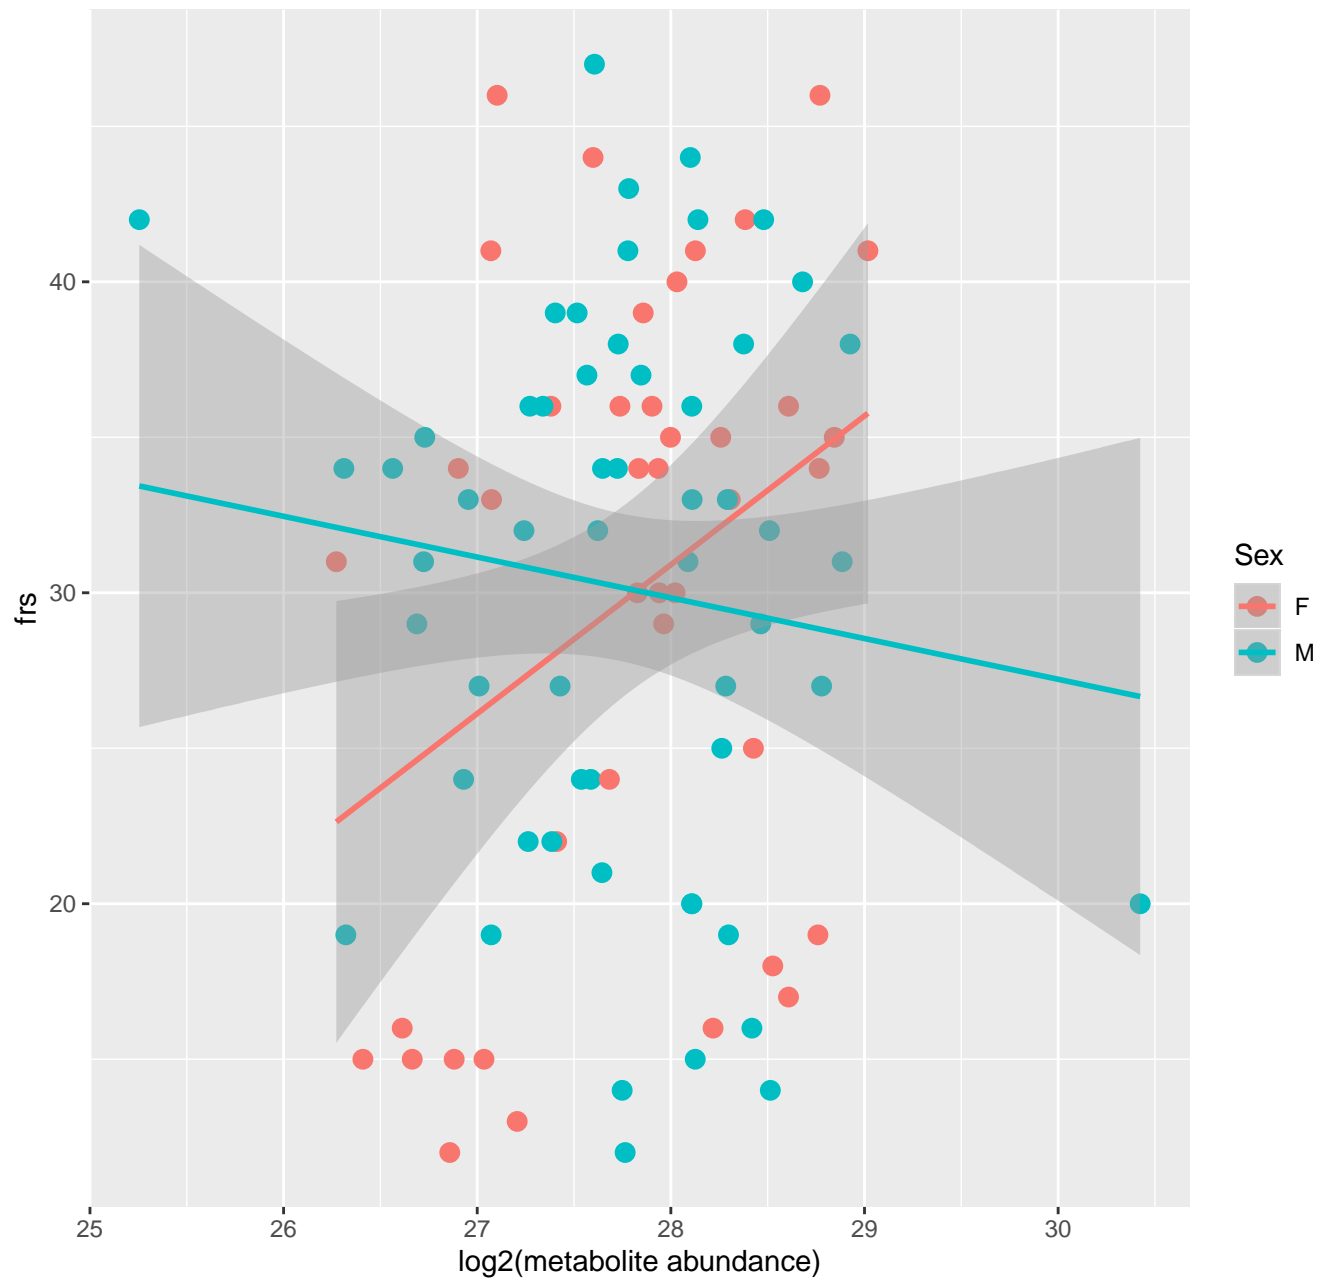



X130.0869.m.z R2\_F,M = 0.0381 , 0.0571 pval\_F,M = 0.221 , 0.0761

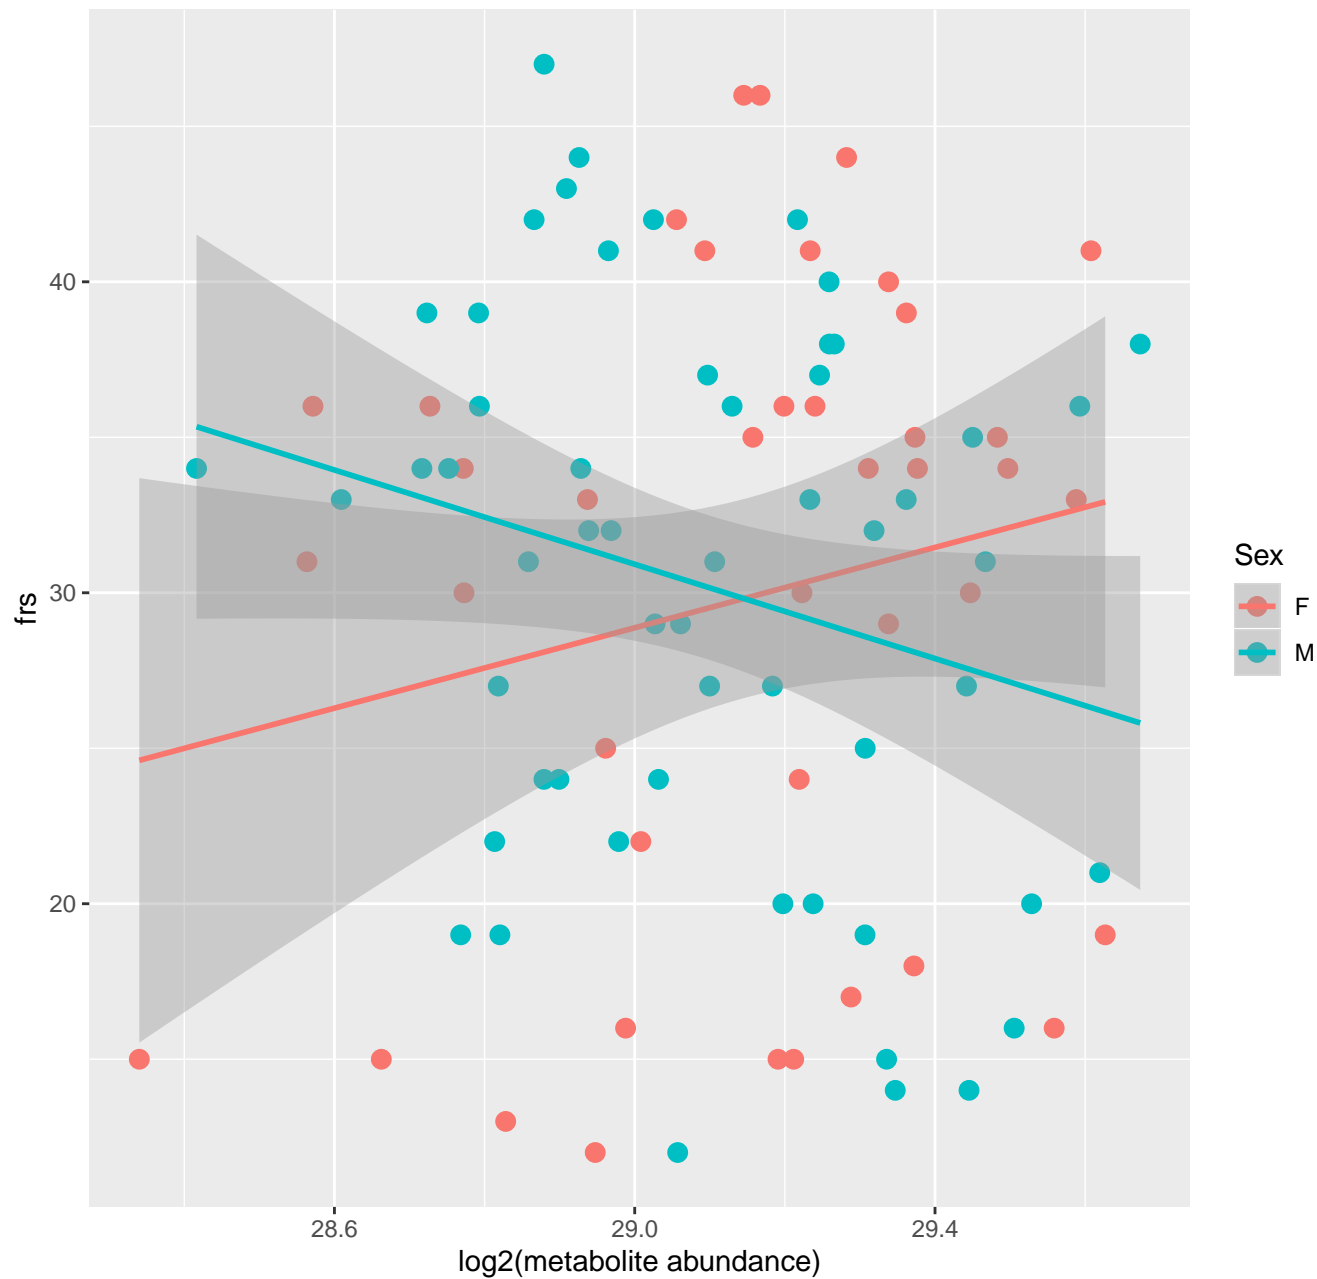

X123.0560.m.z R2\_F,M = 3.68e-08 , 0.00661 pval\_F,M = 0.999 , 0.551

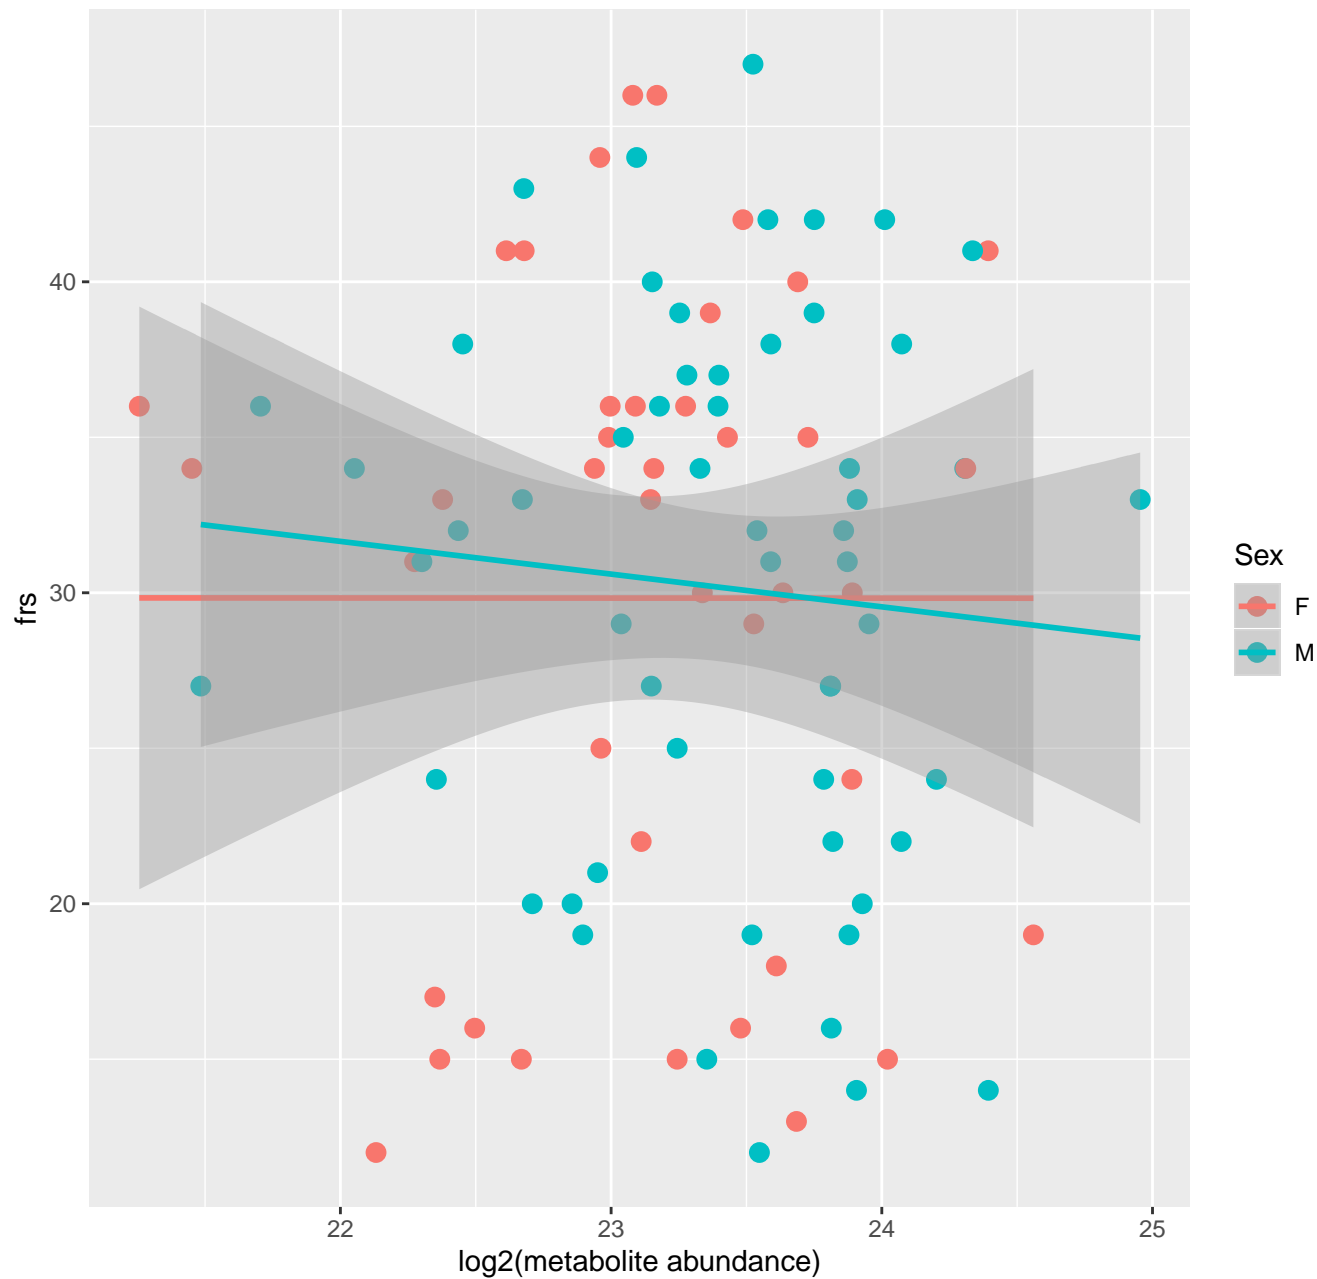

X188.0714.m.z R2\_F,M = 0.102 , 0.00337 pval\_F,M = 0.0413 , 0.671

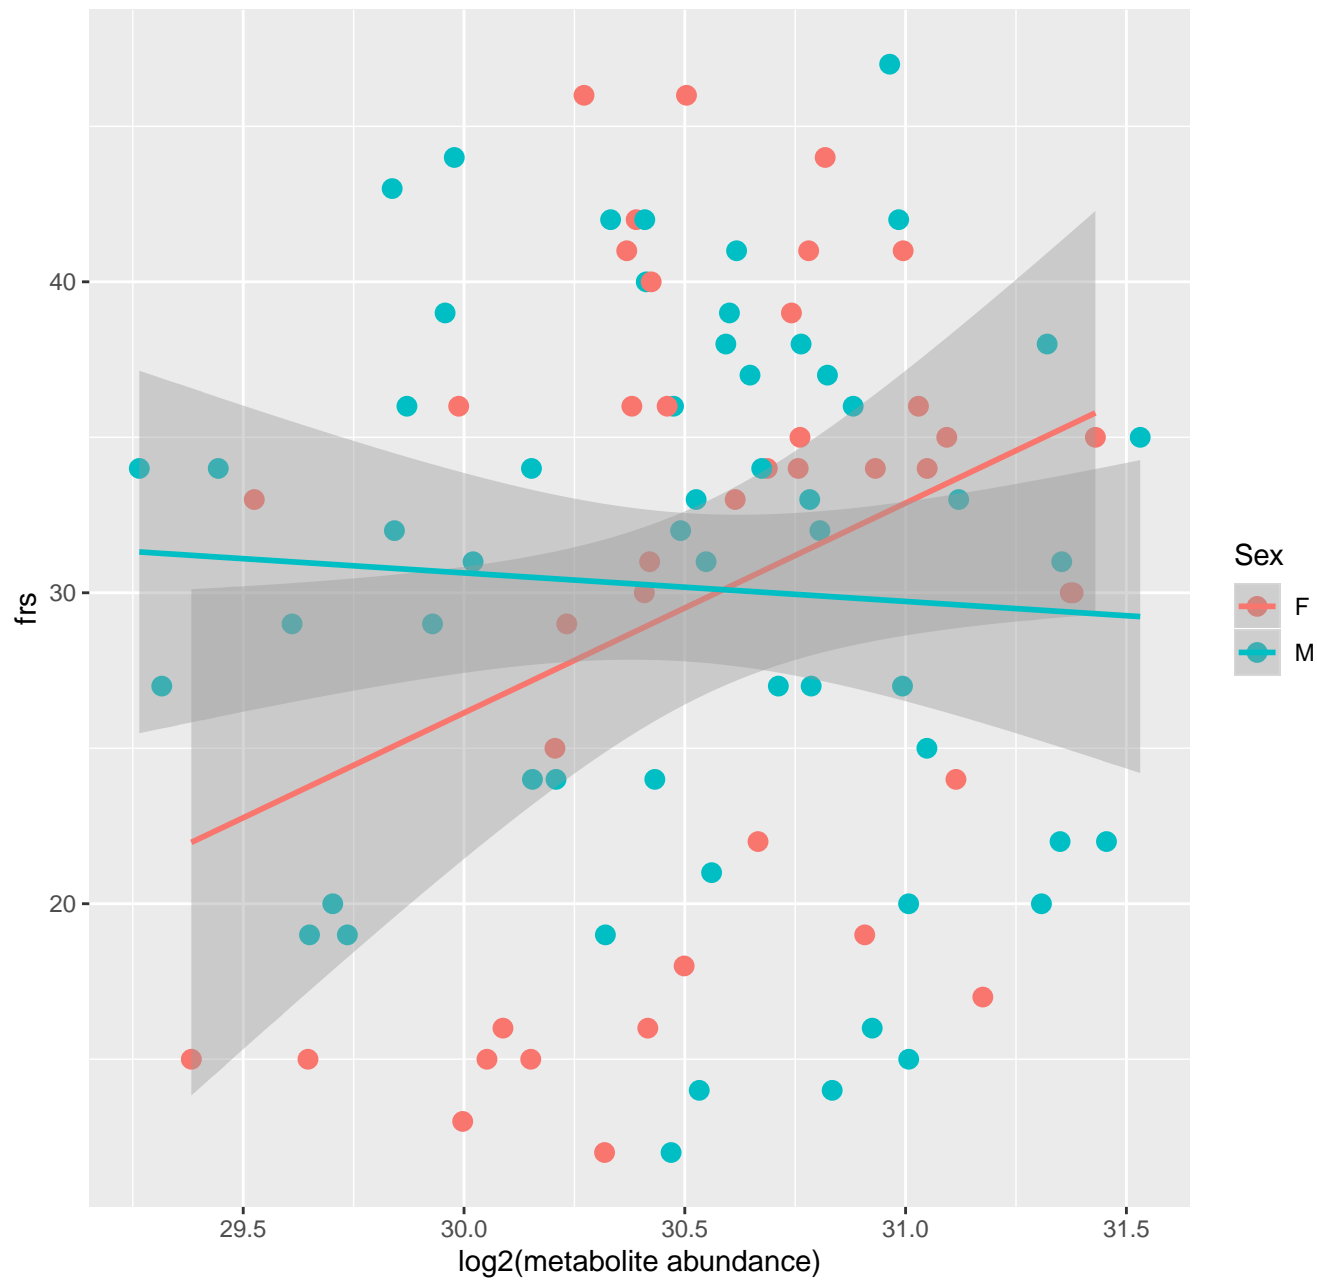

X118.0658.m.z R2\_F,M = 0.108 , 0.00255 pval\_F,M = 0.0356 , 0.712

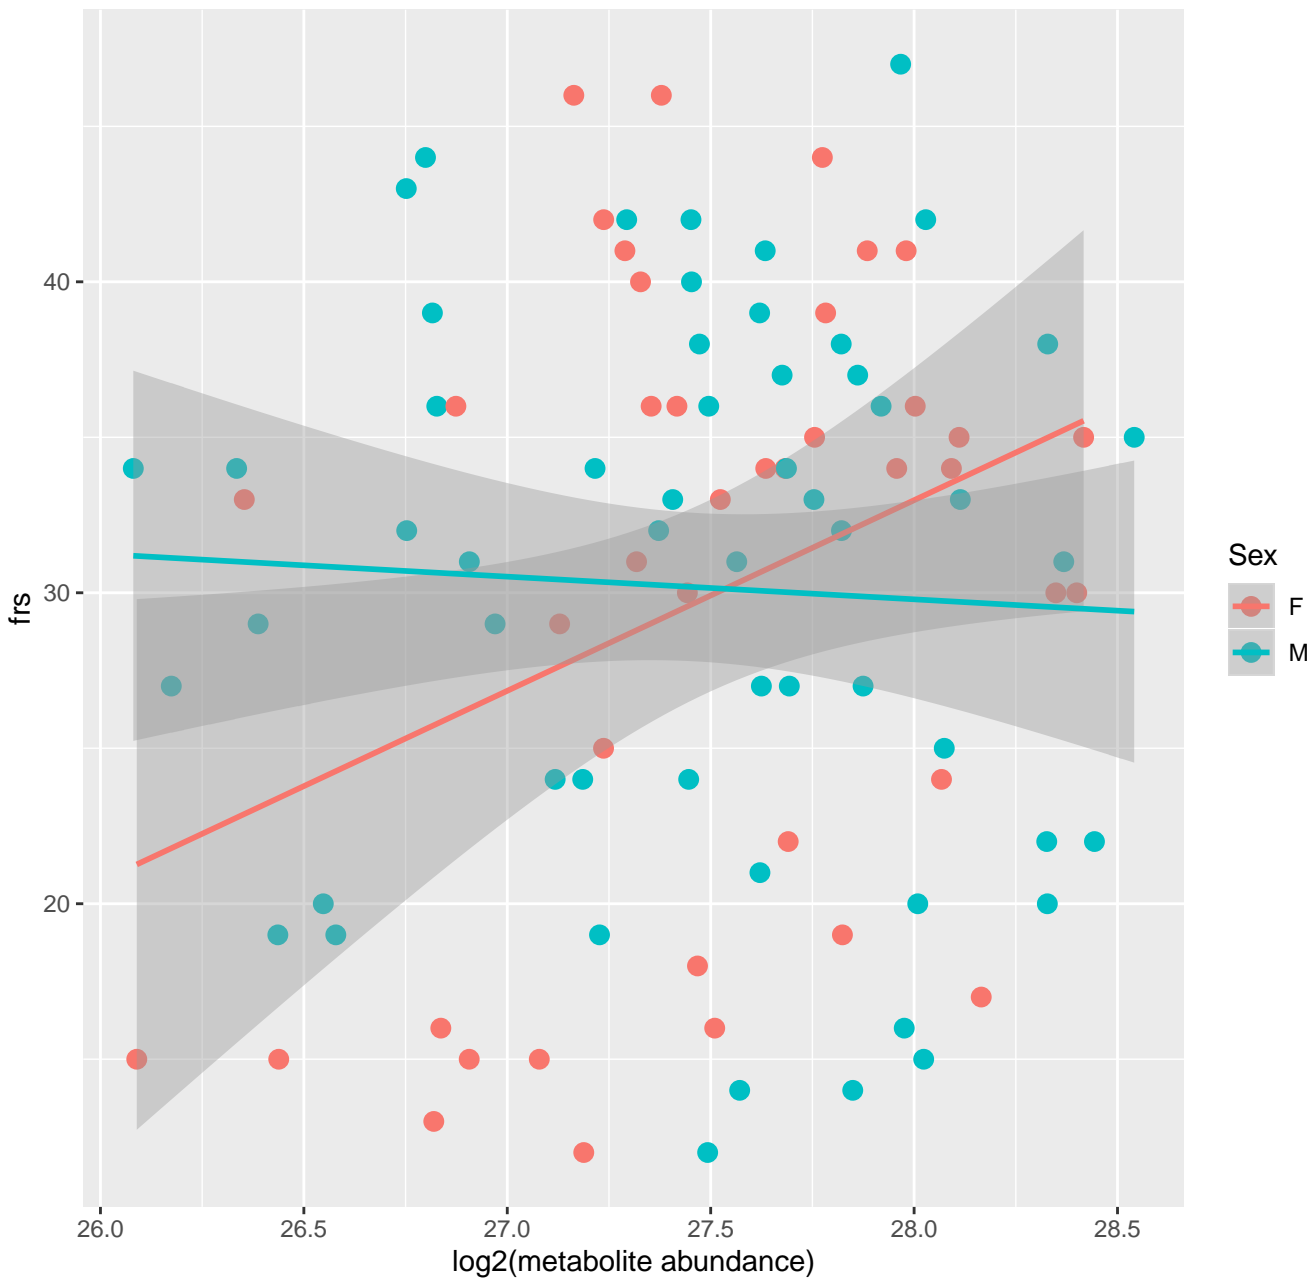

X209.0931.m.z R2\_F,M = 0.0952 , 0.00319 pval\_F,M = 0.0497 , 0.679

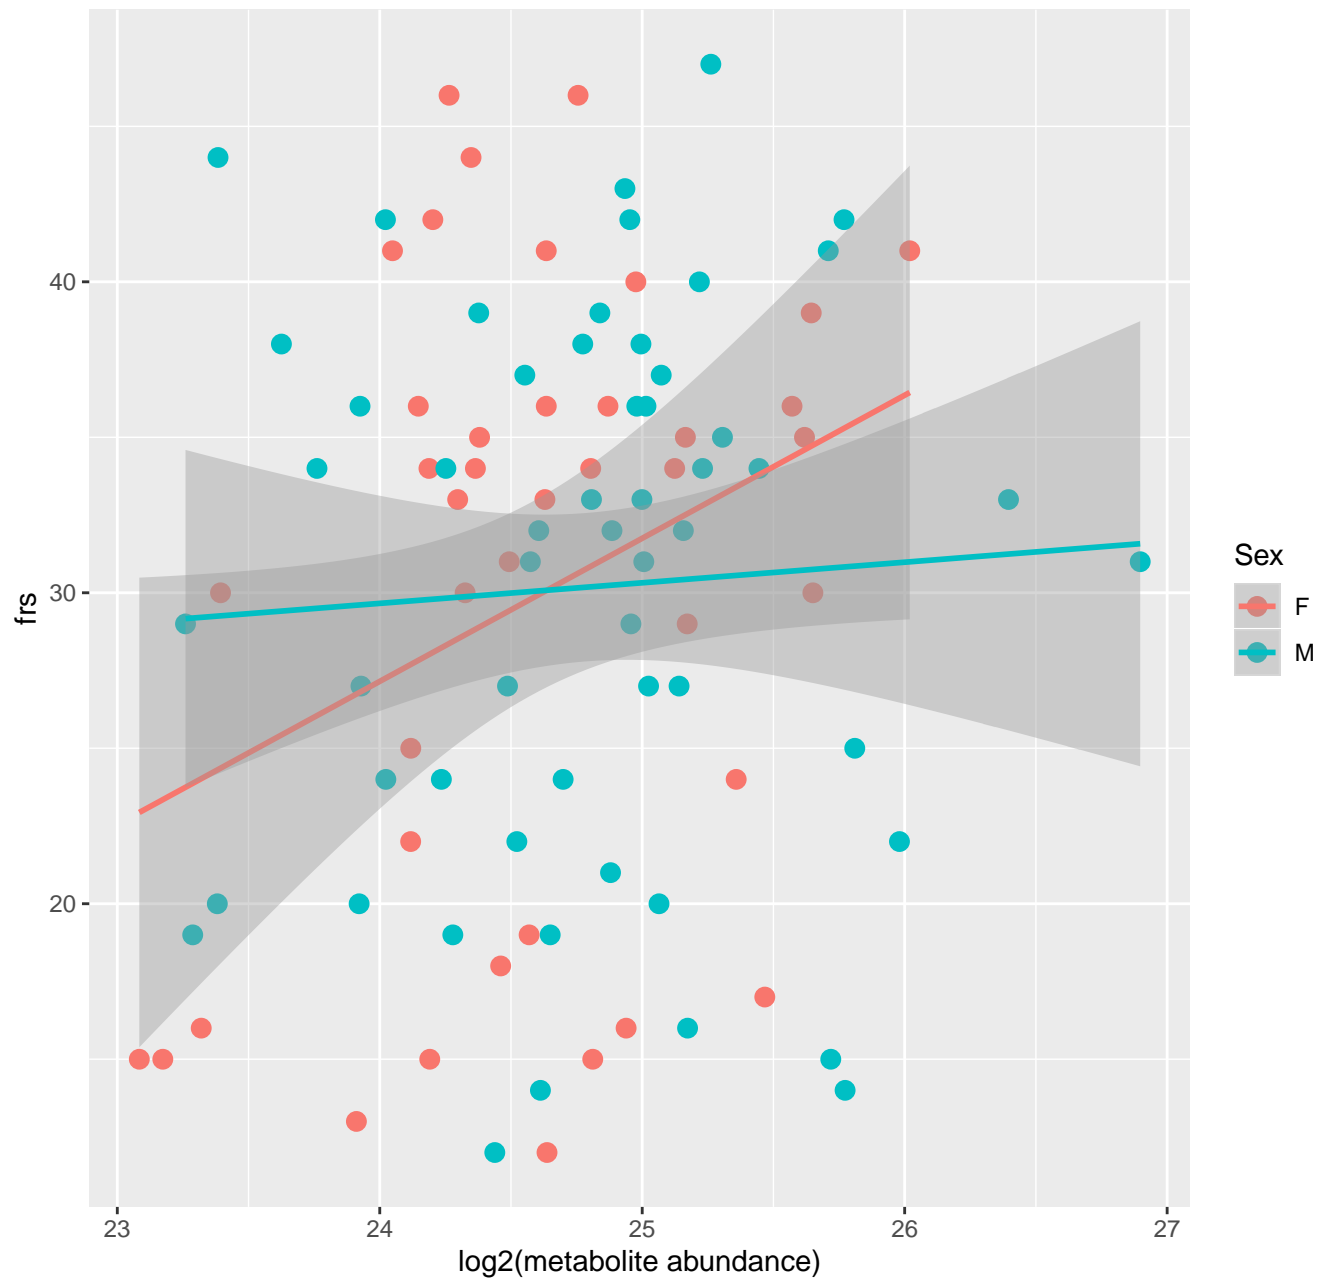

X136.0763.m.z R2\_F,M = 0.0607 , 0.00044 pval\_F,M = 0.12 , 0.878

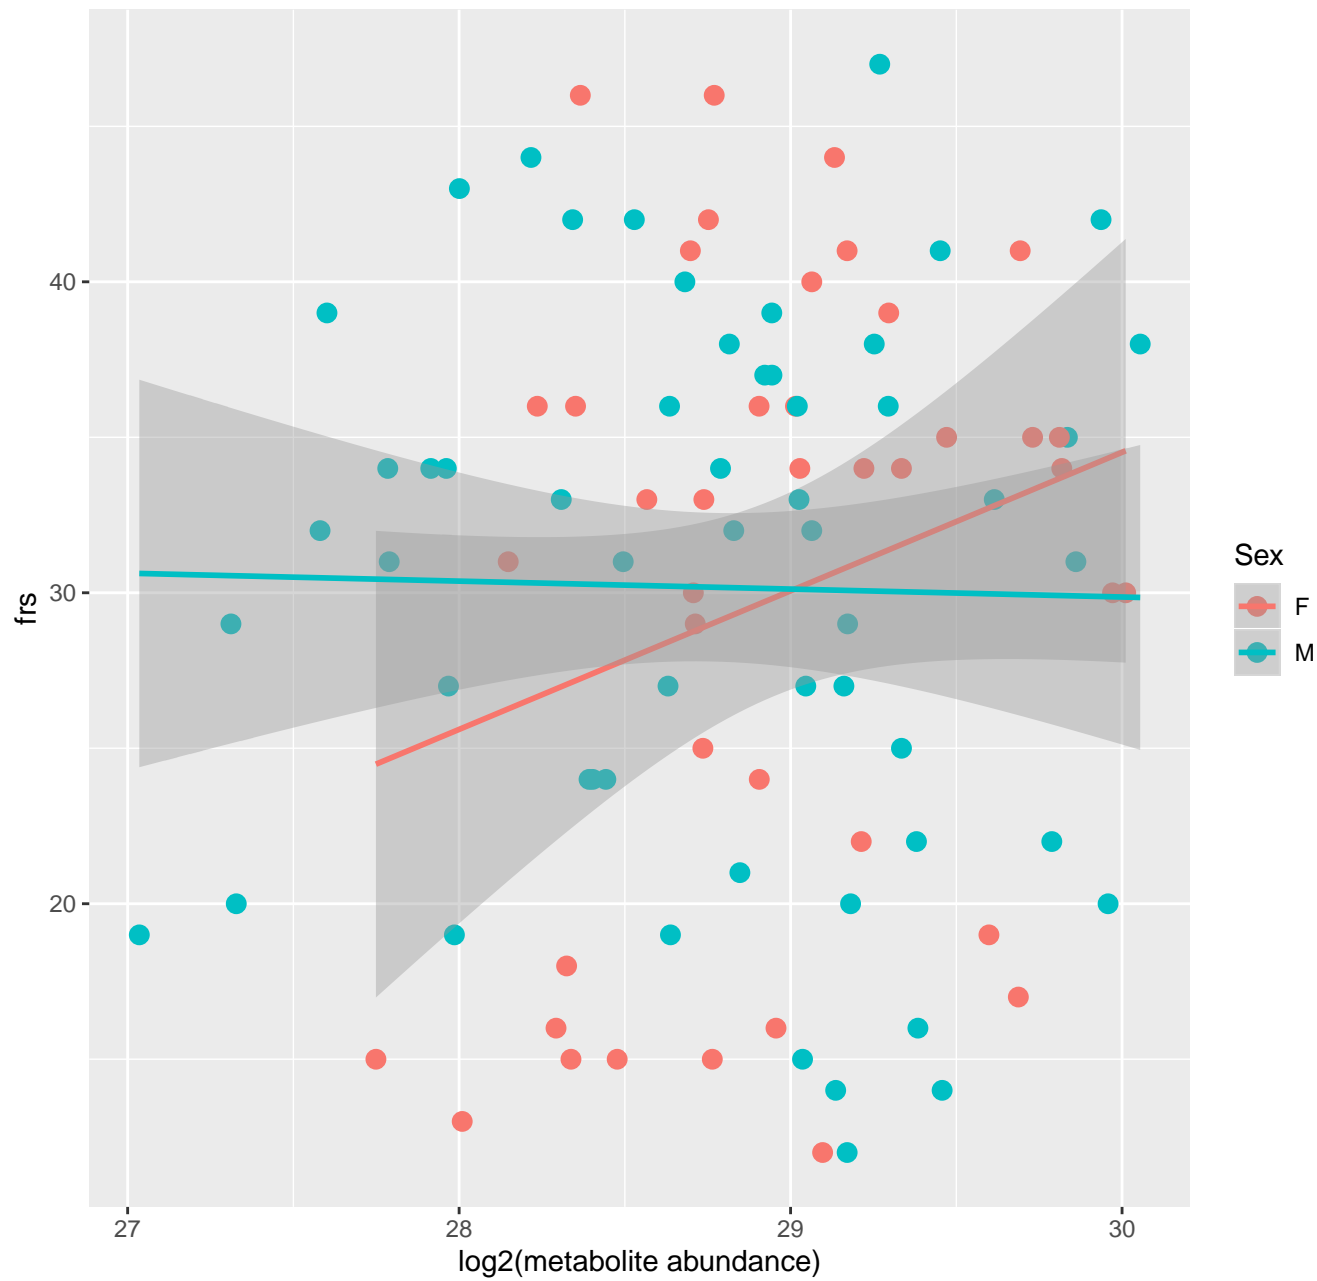

X159.0772.m.z R2\_F,M = 0.0716 , 0.000195 pval\_F,M = 0.0908 , 0.919

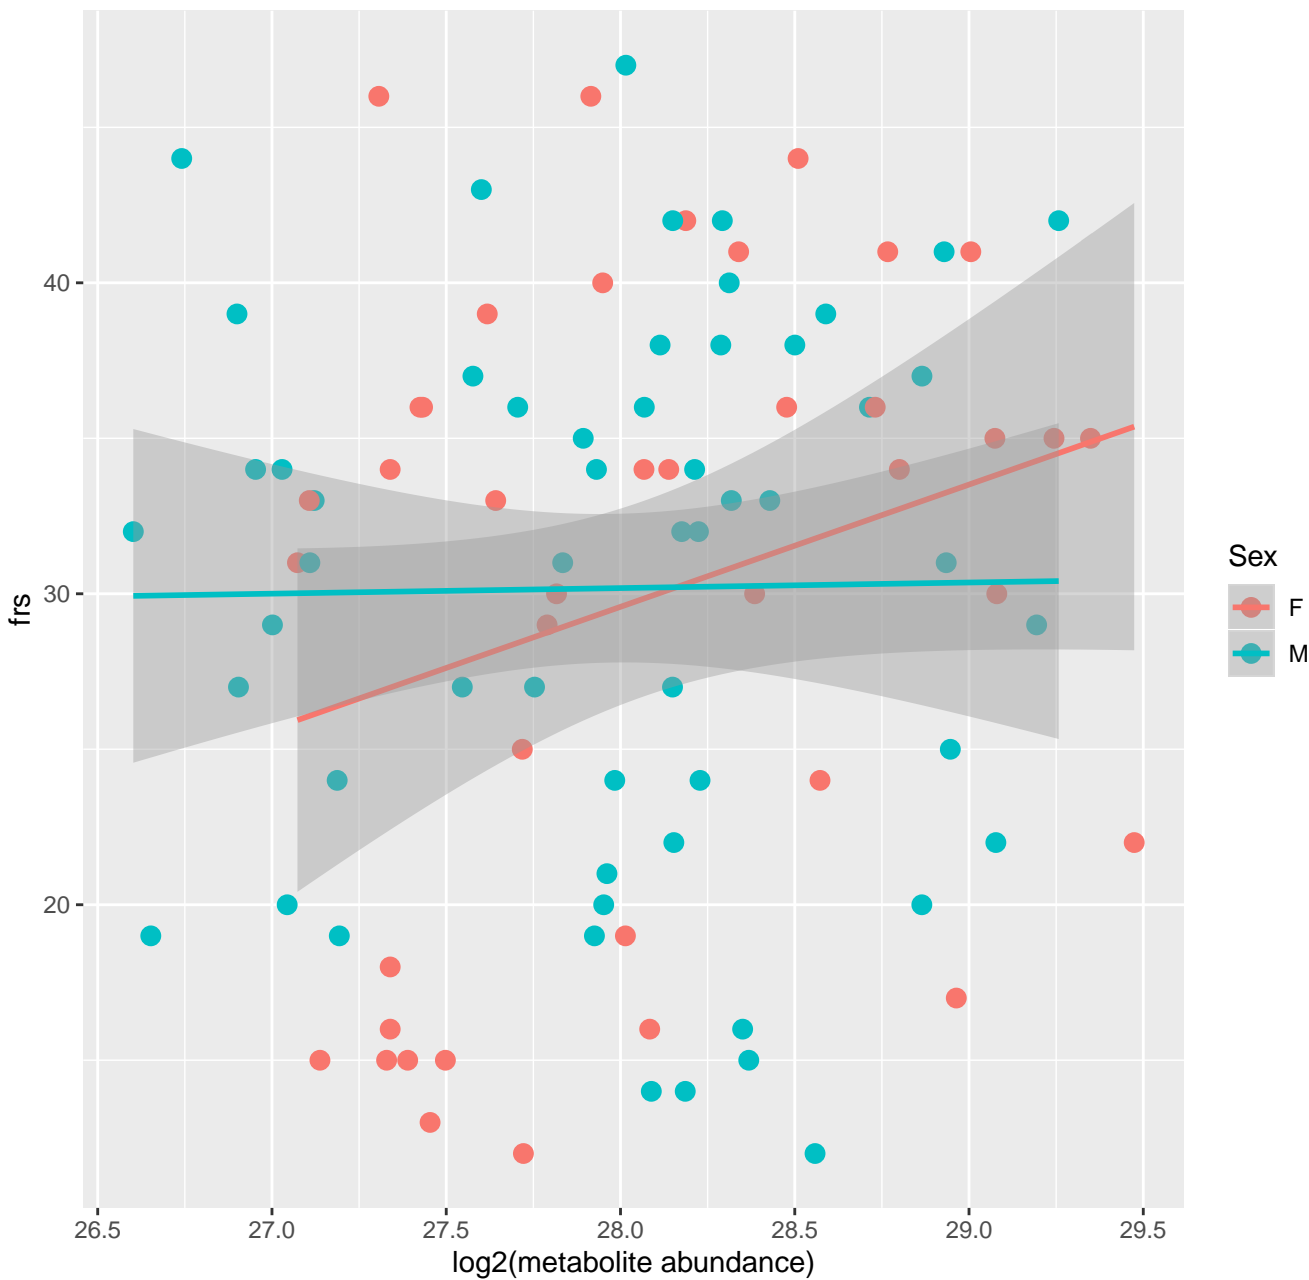

X165.0554.m.z R2\_F,M = 0.0565 , 0.000385 pval\_F,M = 0.134 , 0.886

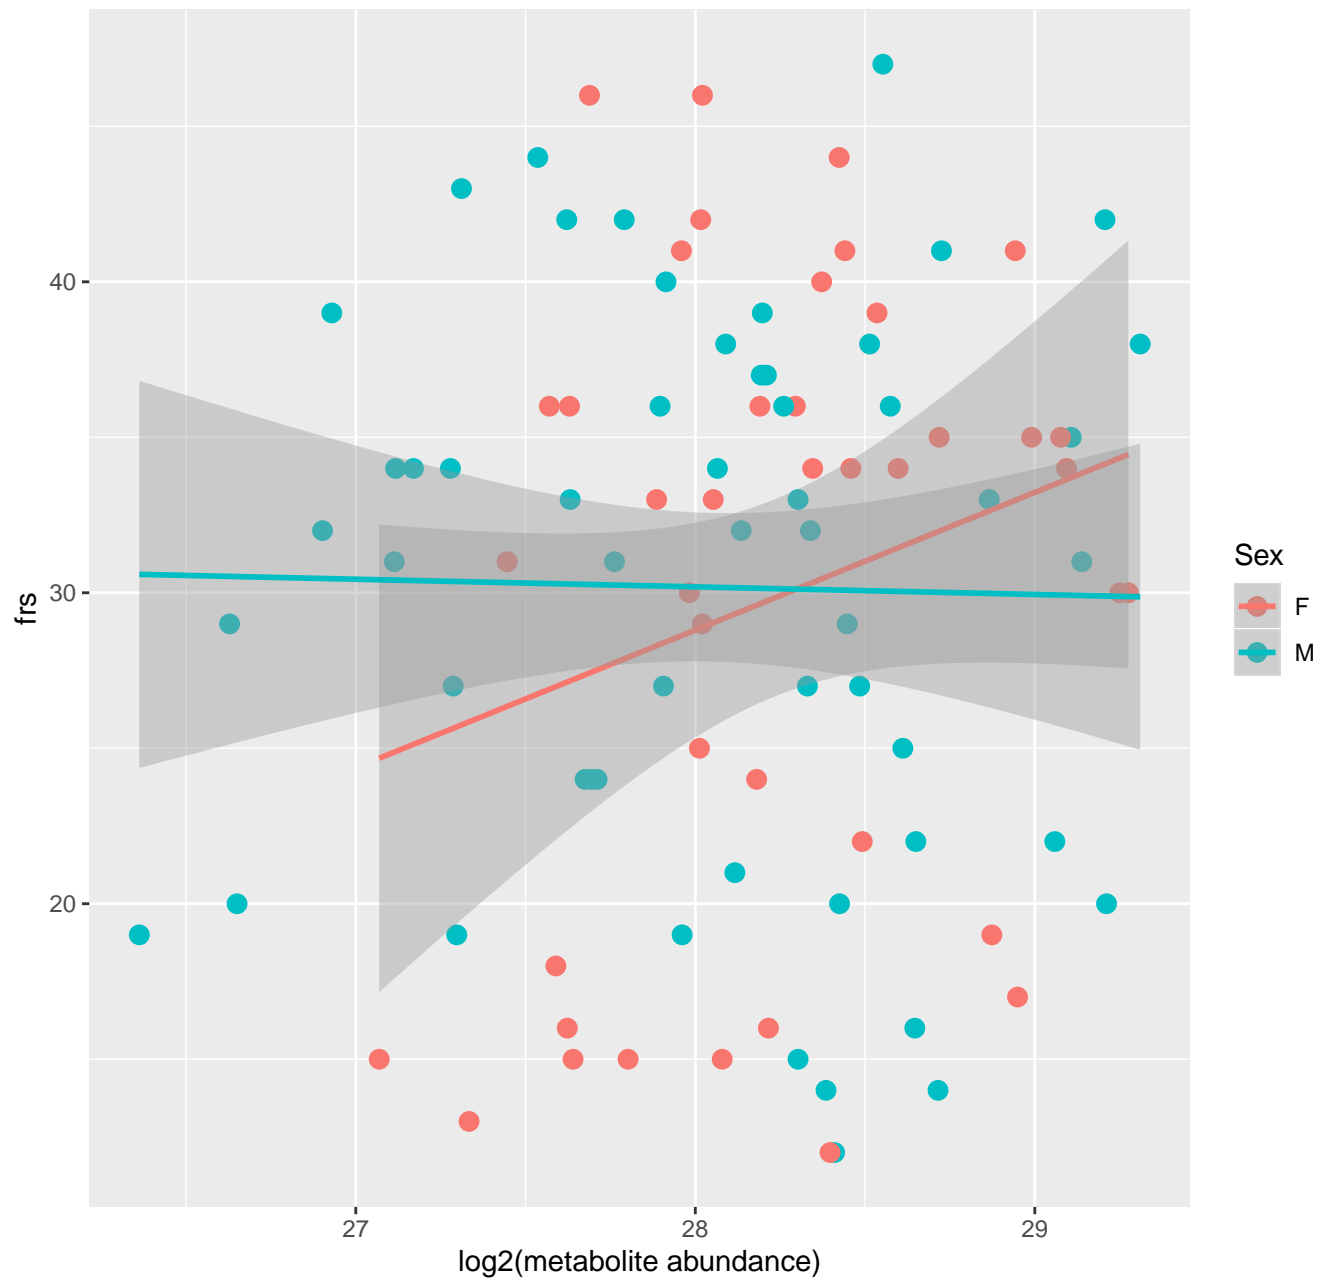

Supplement: NIHMS1611259-supplement-Supplemental_File_3.pdf [file NIHMS1611259-supplement-Supplemental_File_3.pdf]
