# Supplementary material
Source: PubMed Central journal article supplement (PMC8273918)

# Alanine

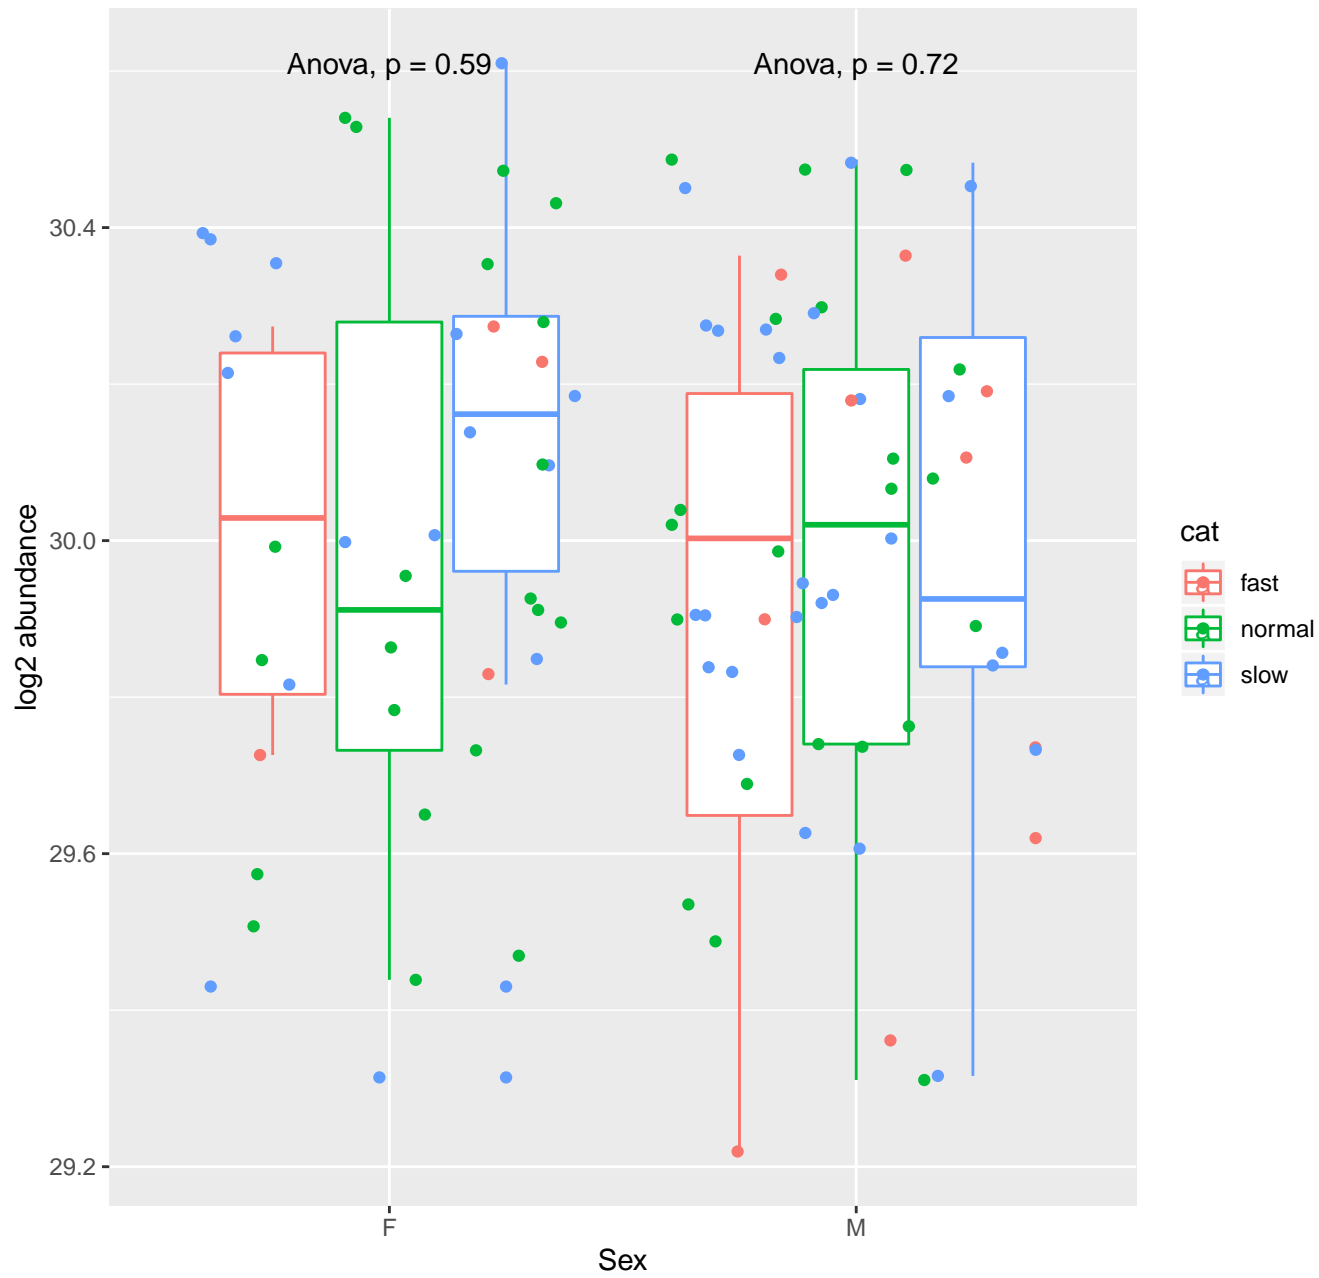

# Arginine

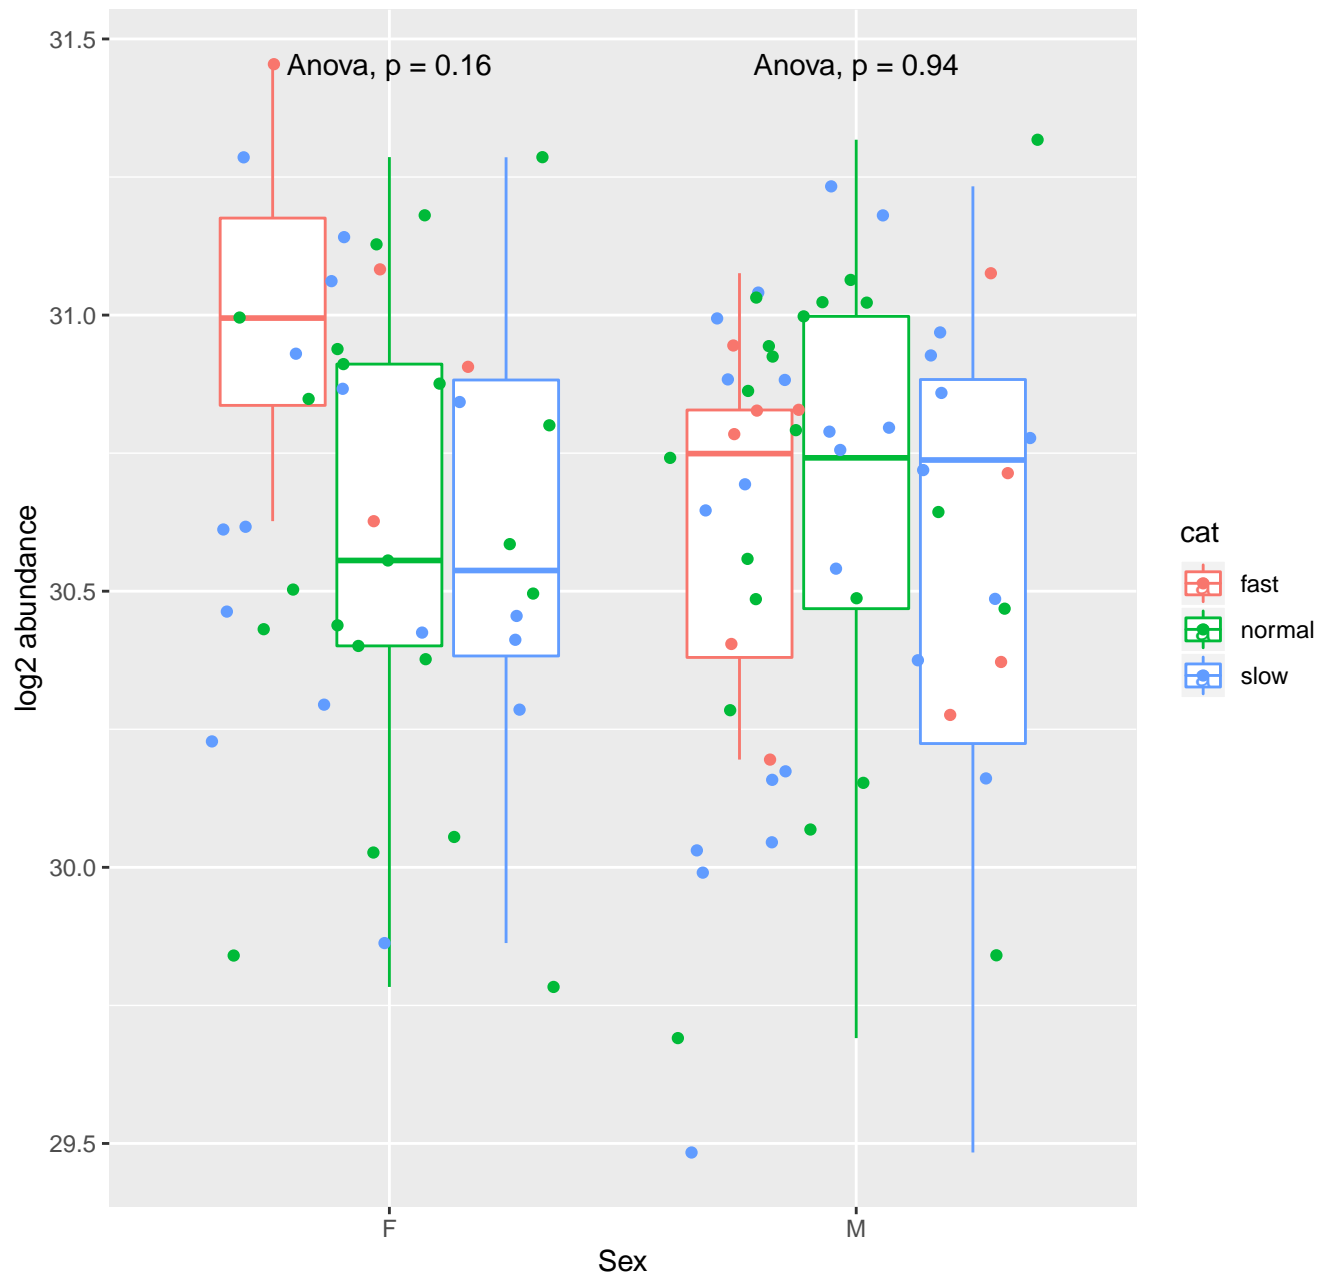

# Asparagine

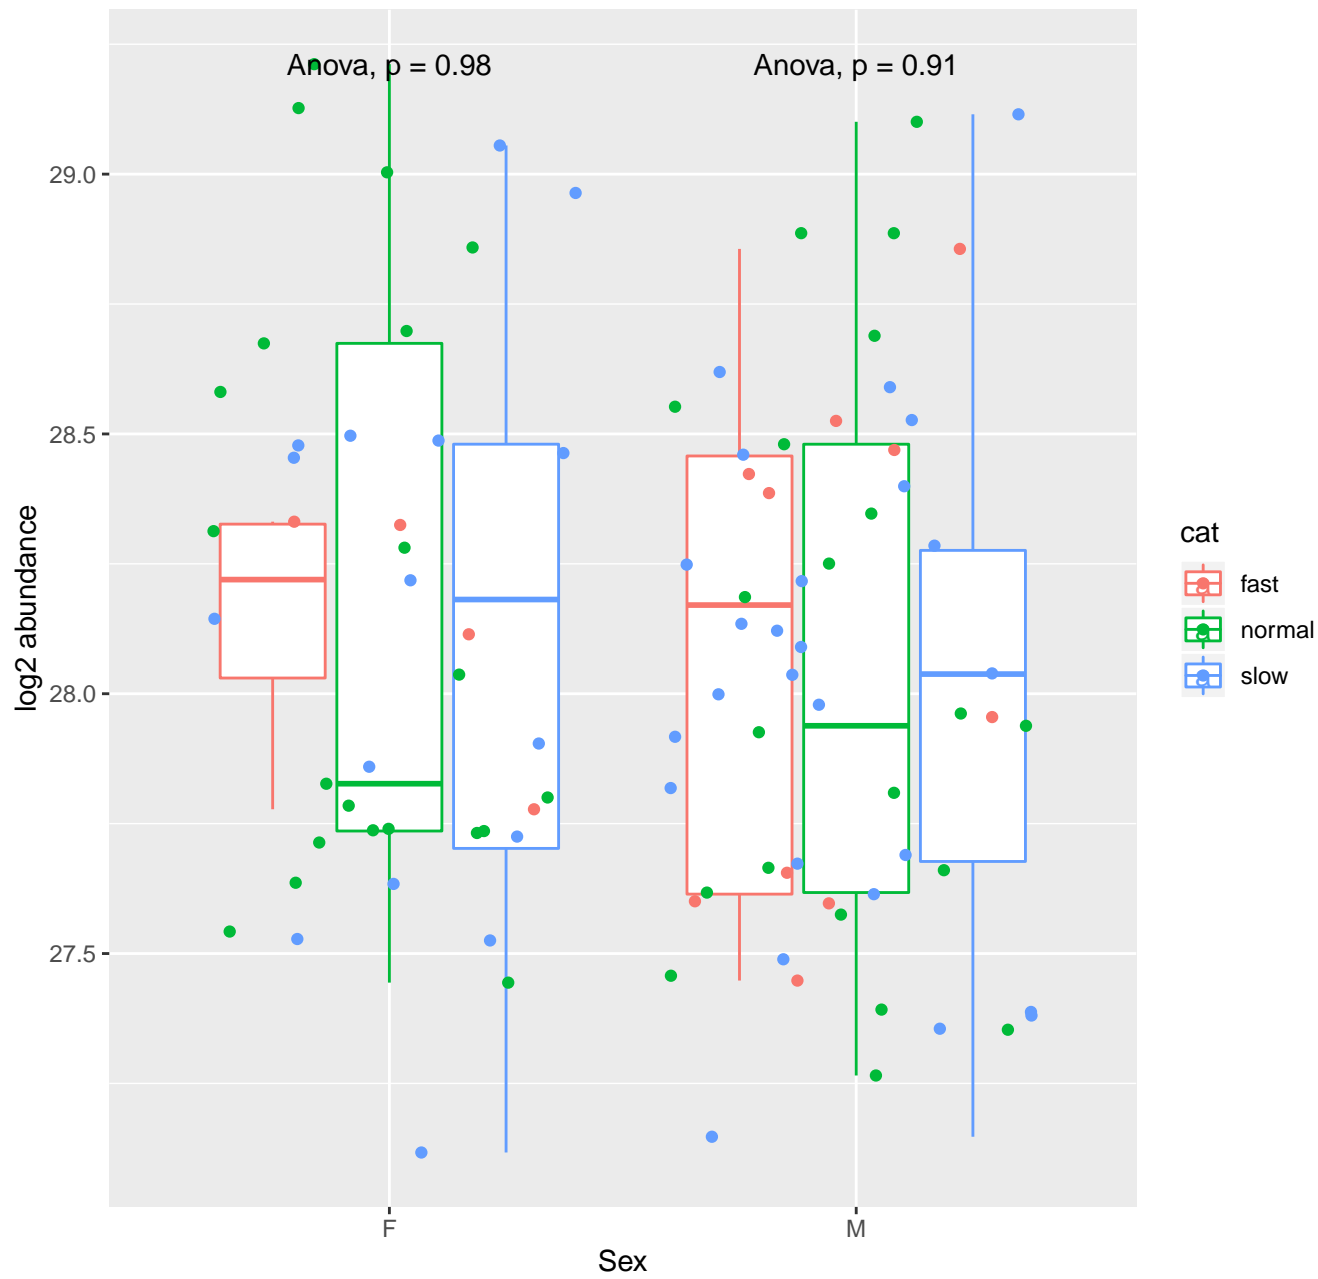

# Aspartic.acid

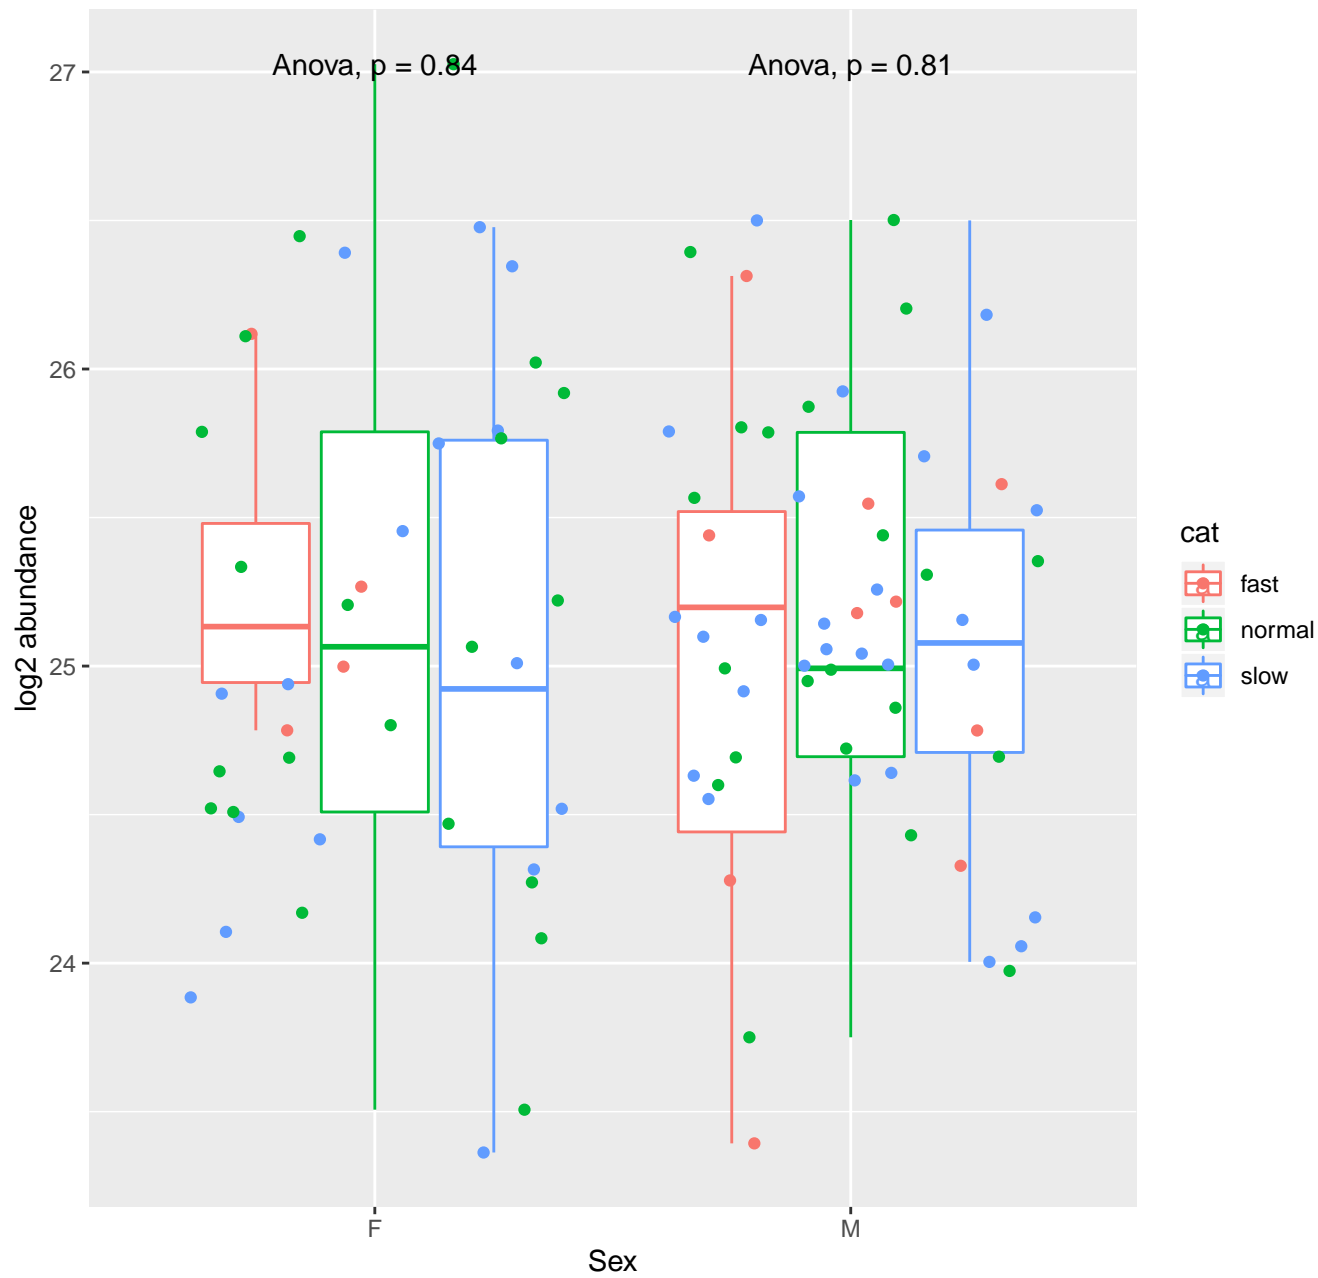

# Cysteine

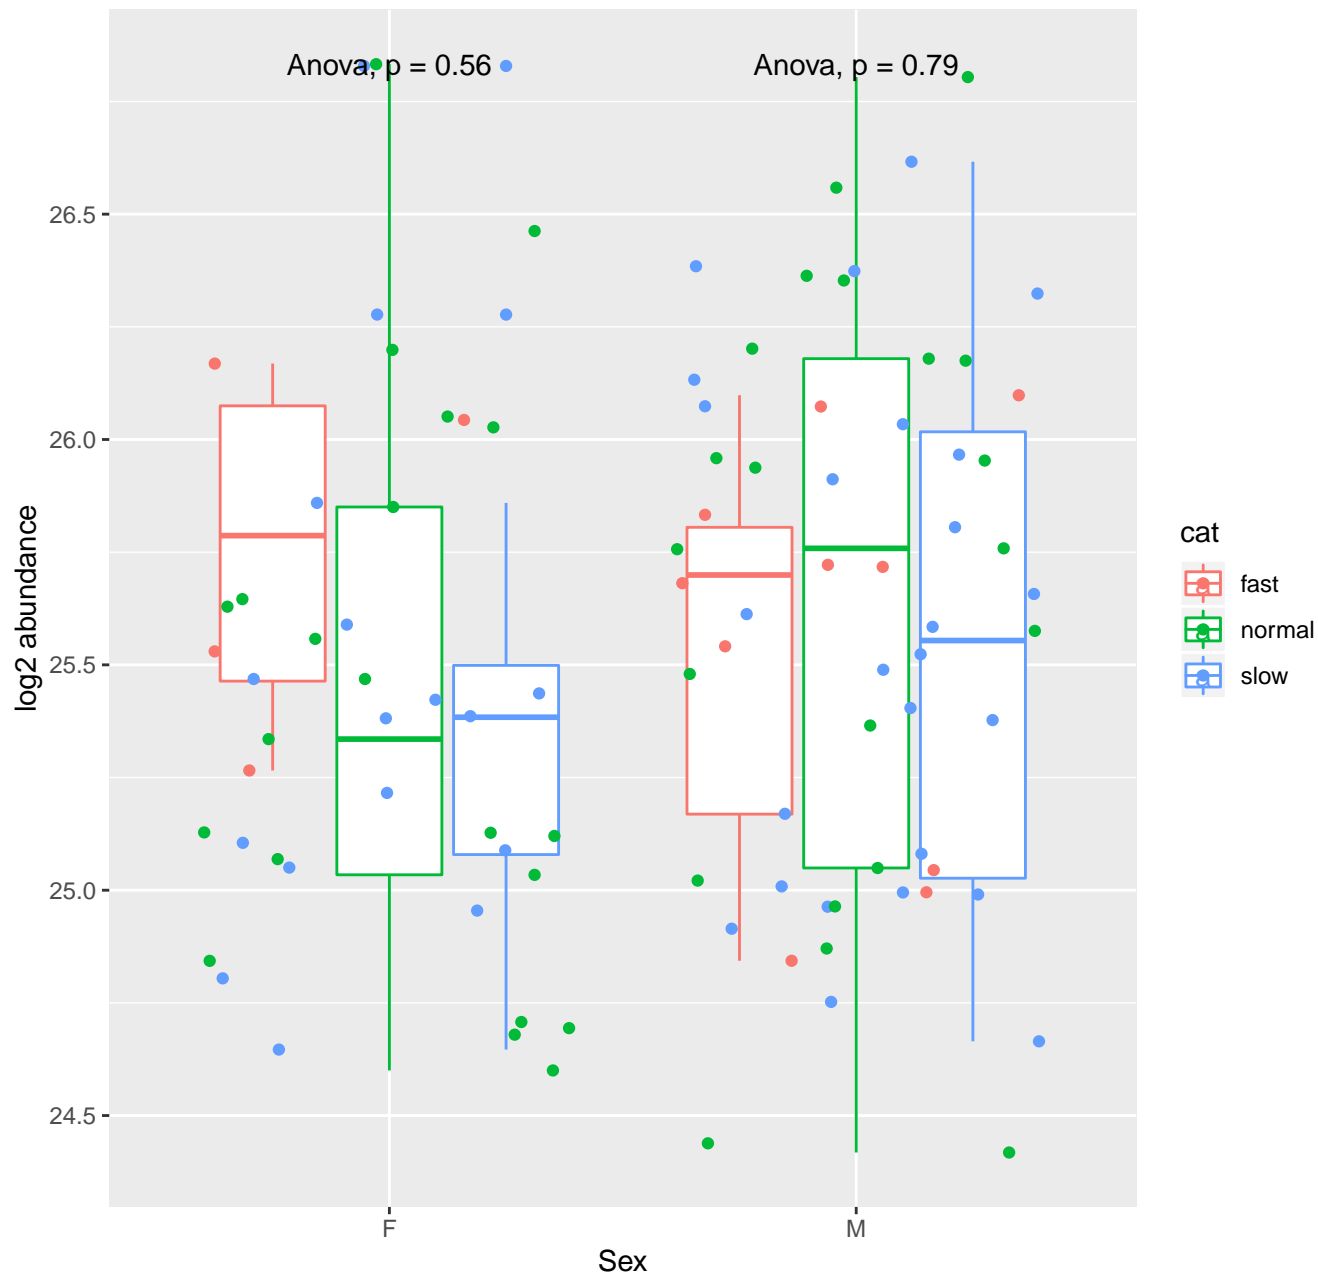

# Glutamine

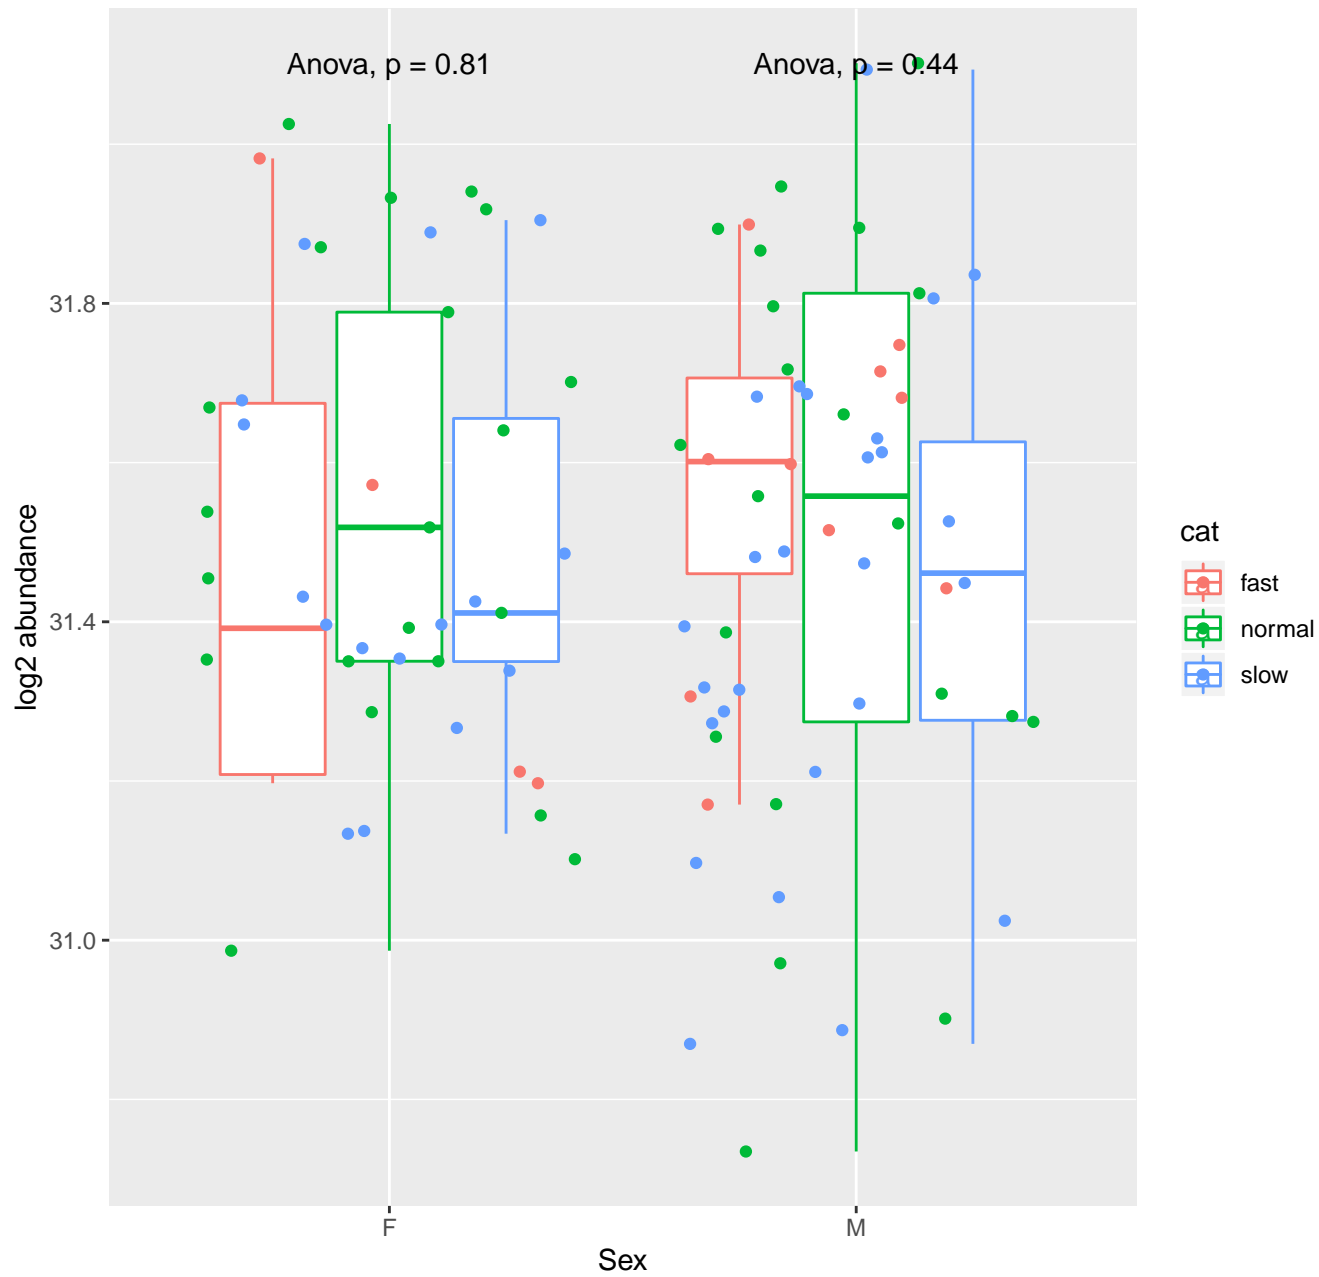

# Glutamic.acid

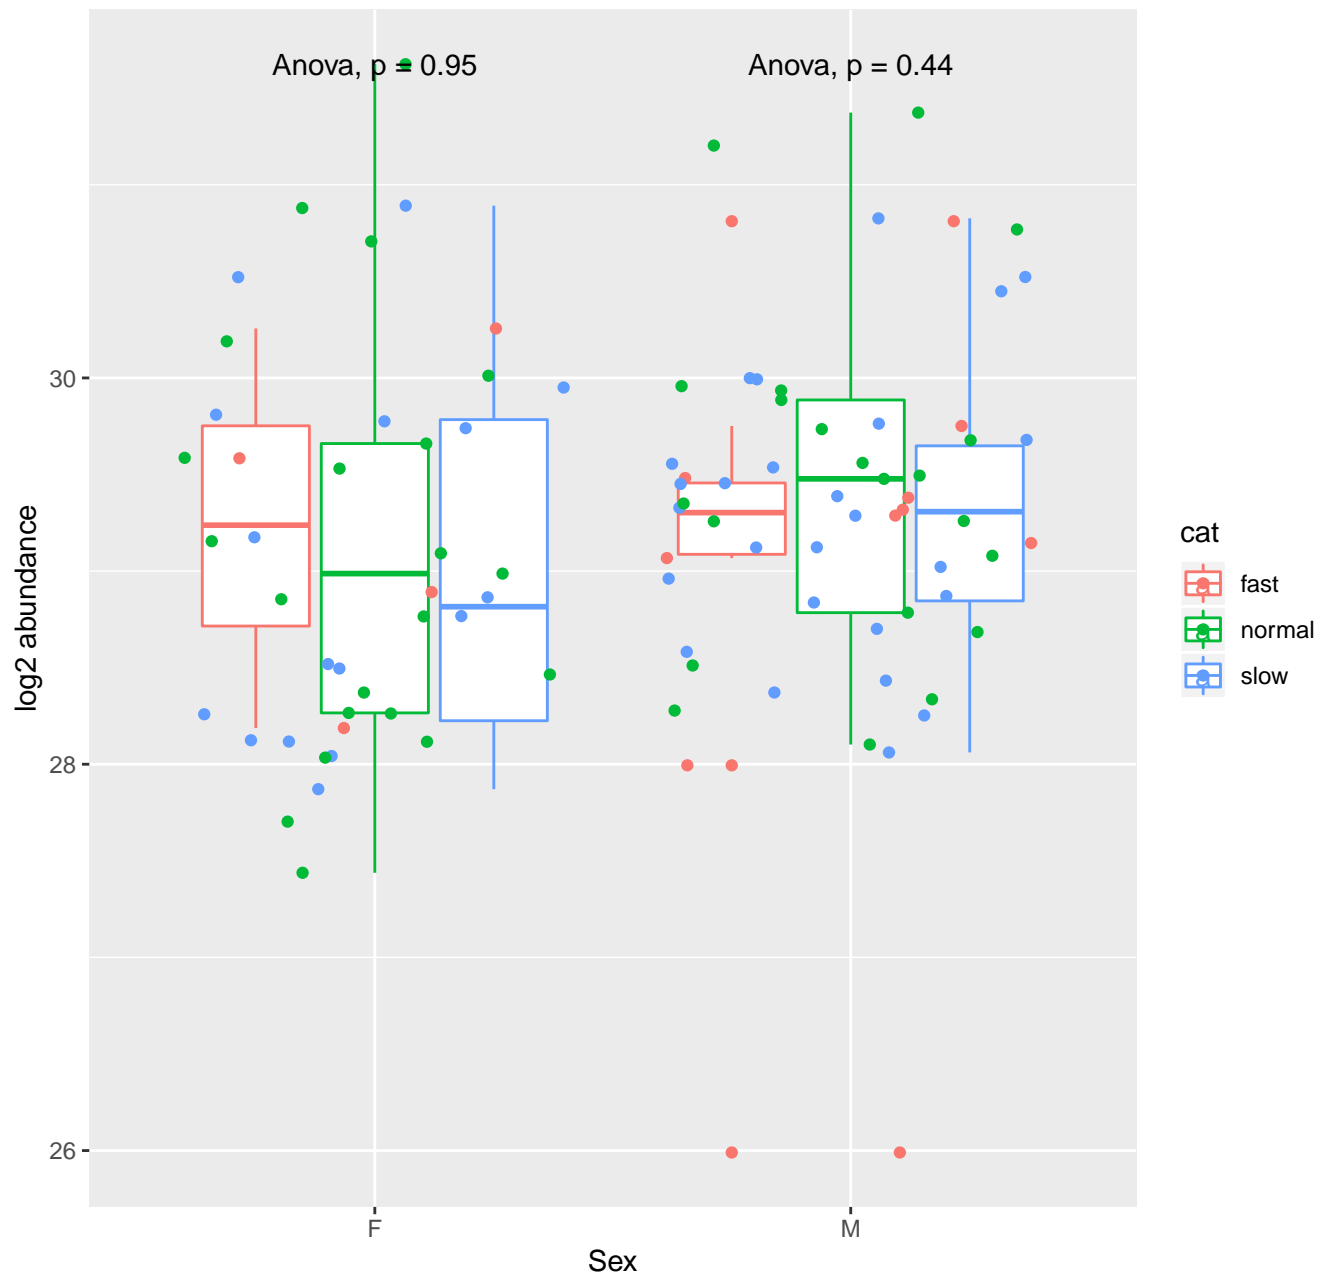

# Glycine

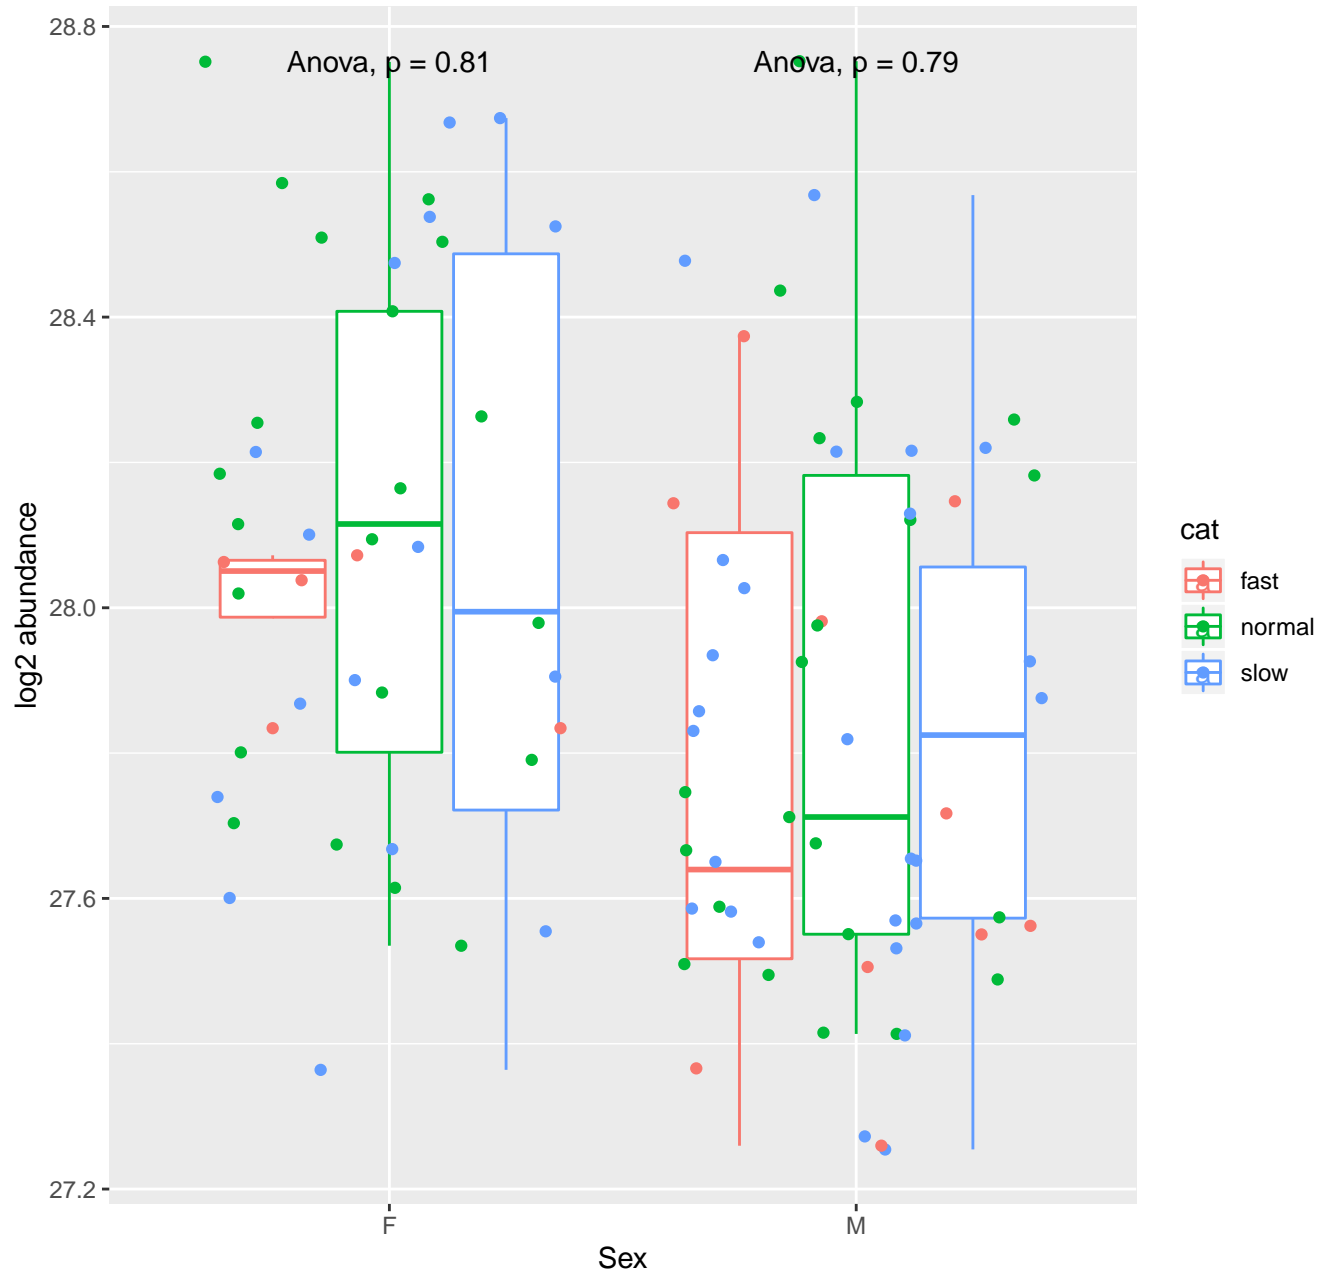



# Histidine

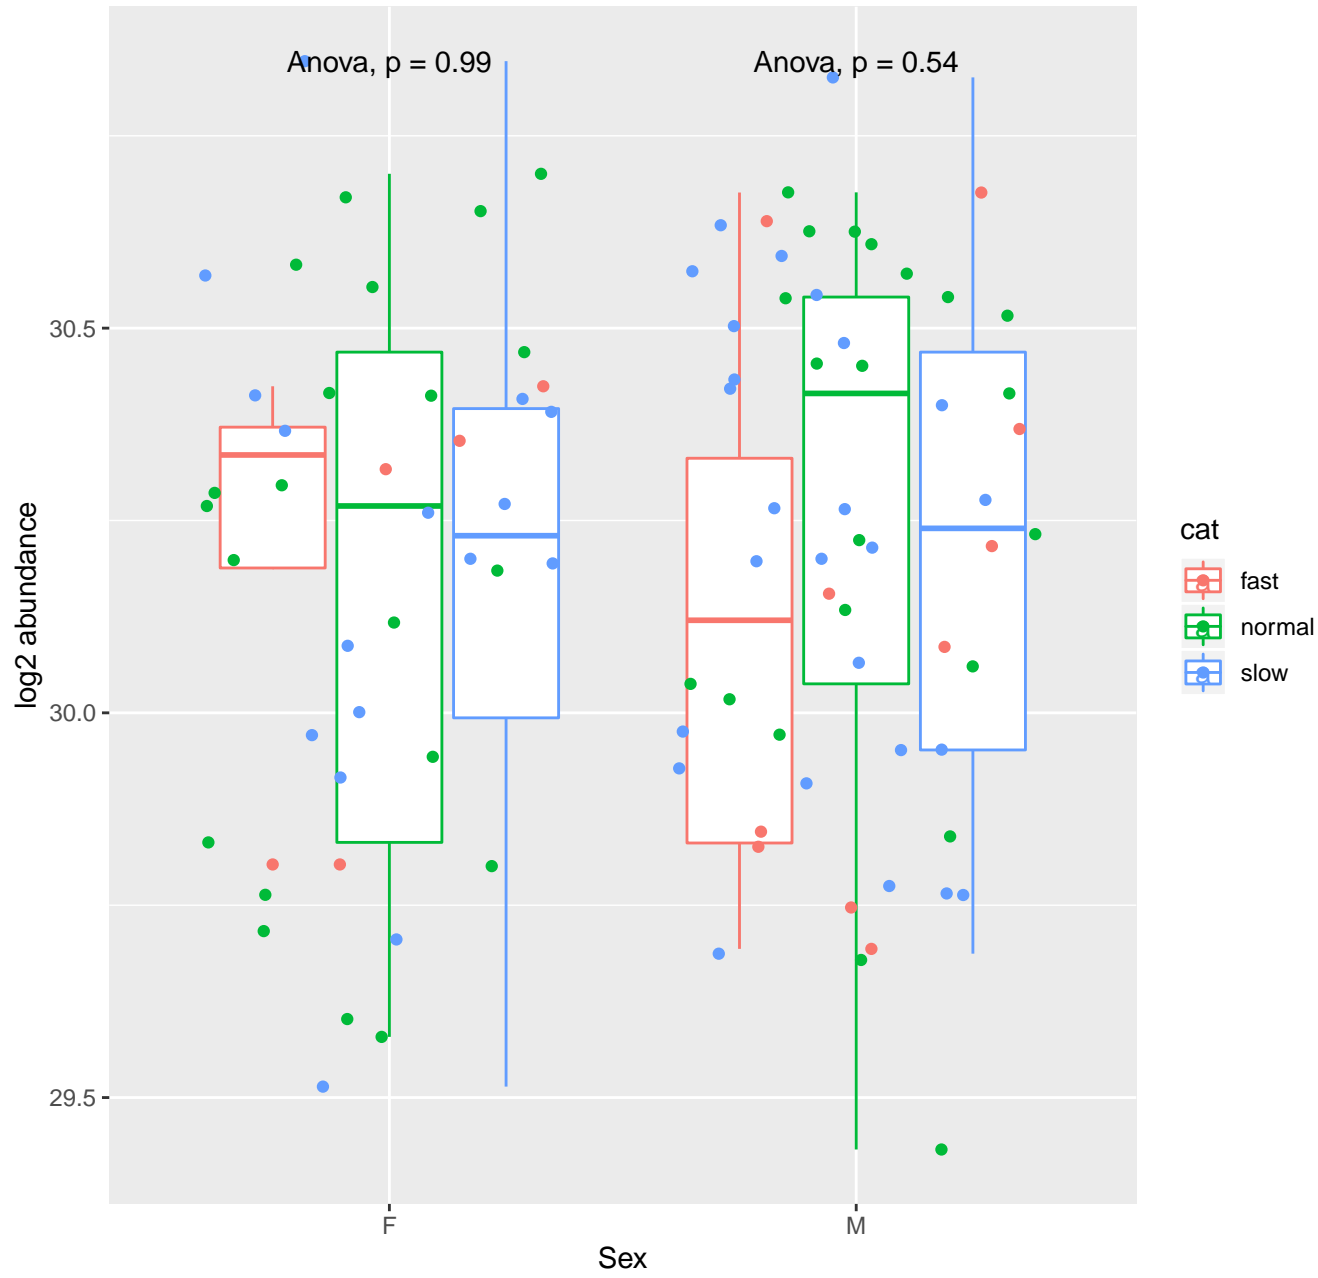

# Isoleucine

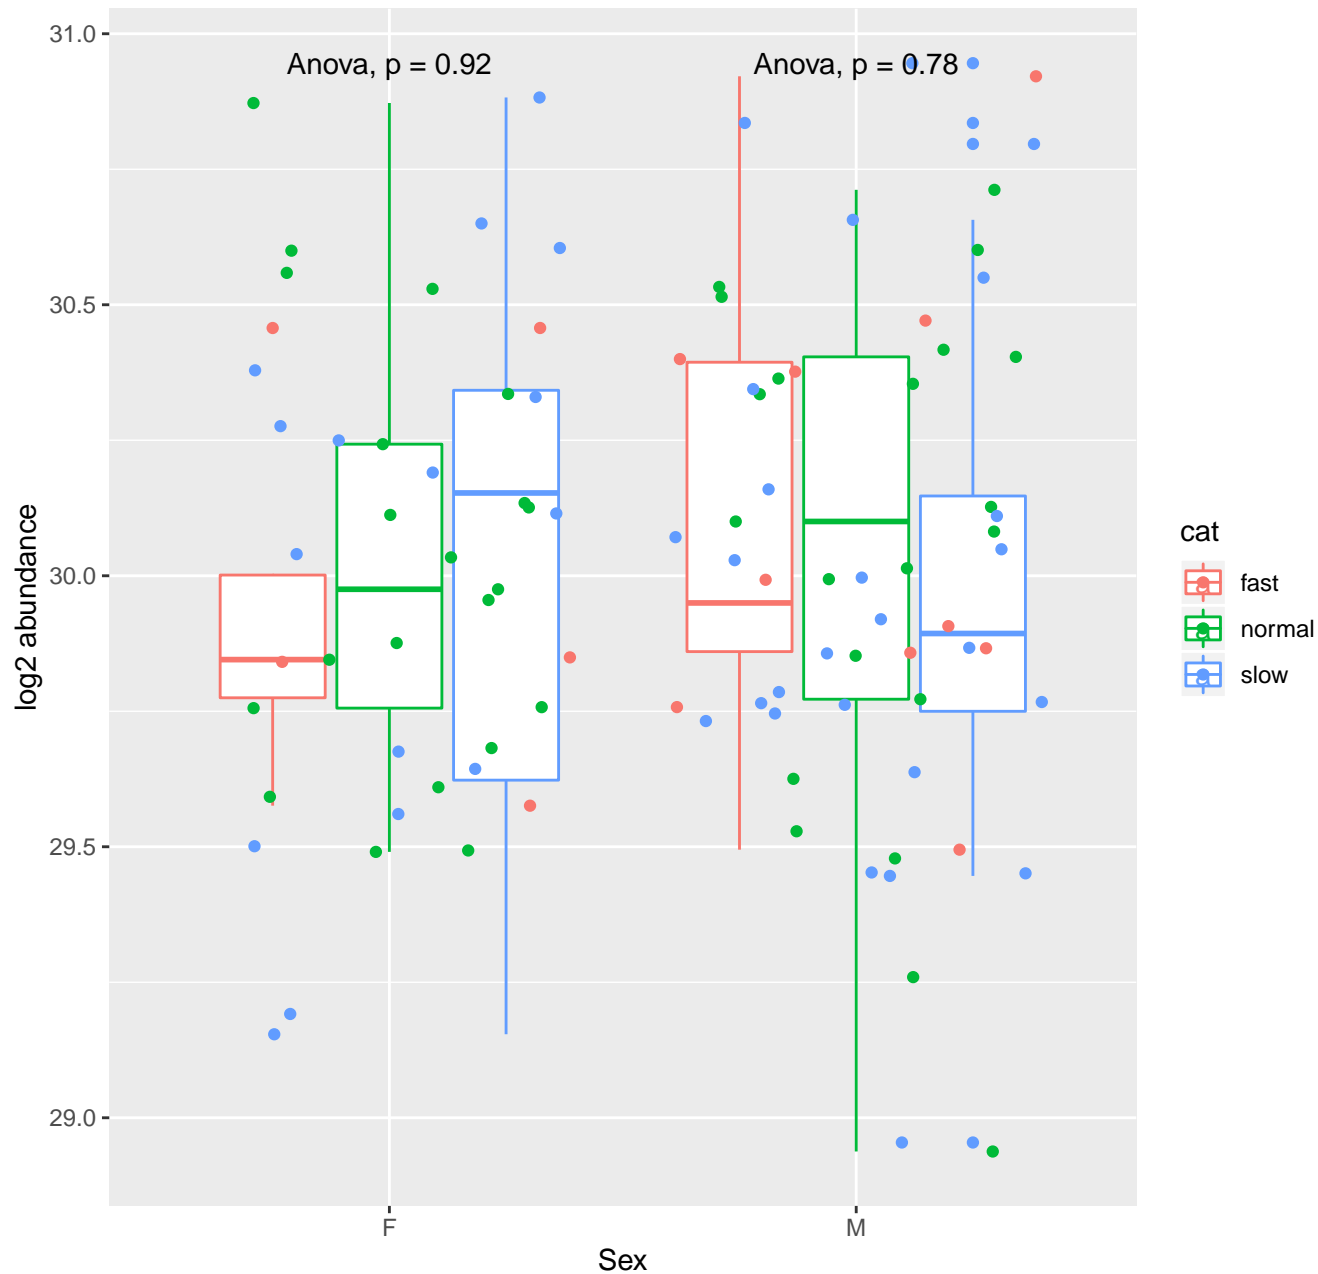

# Leucine

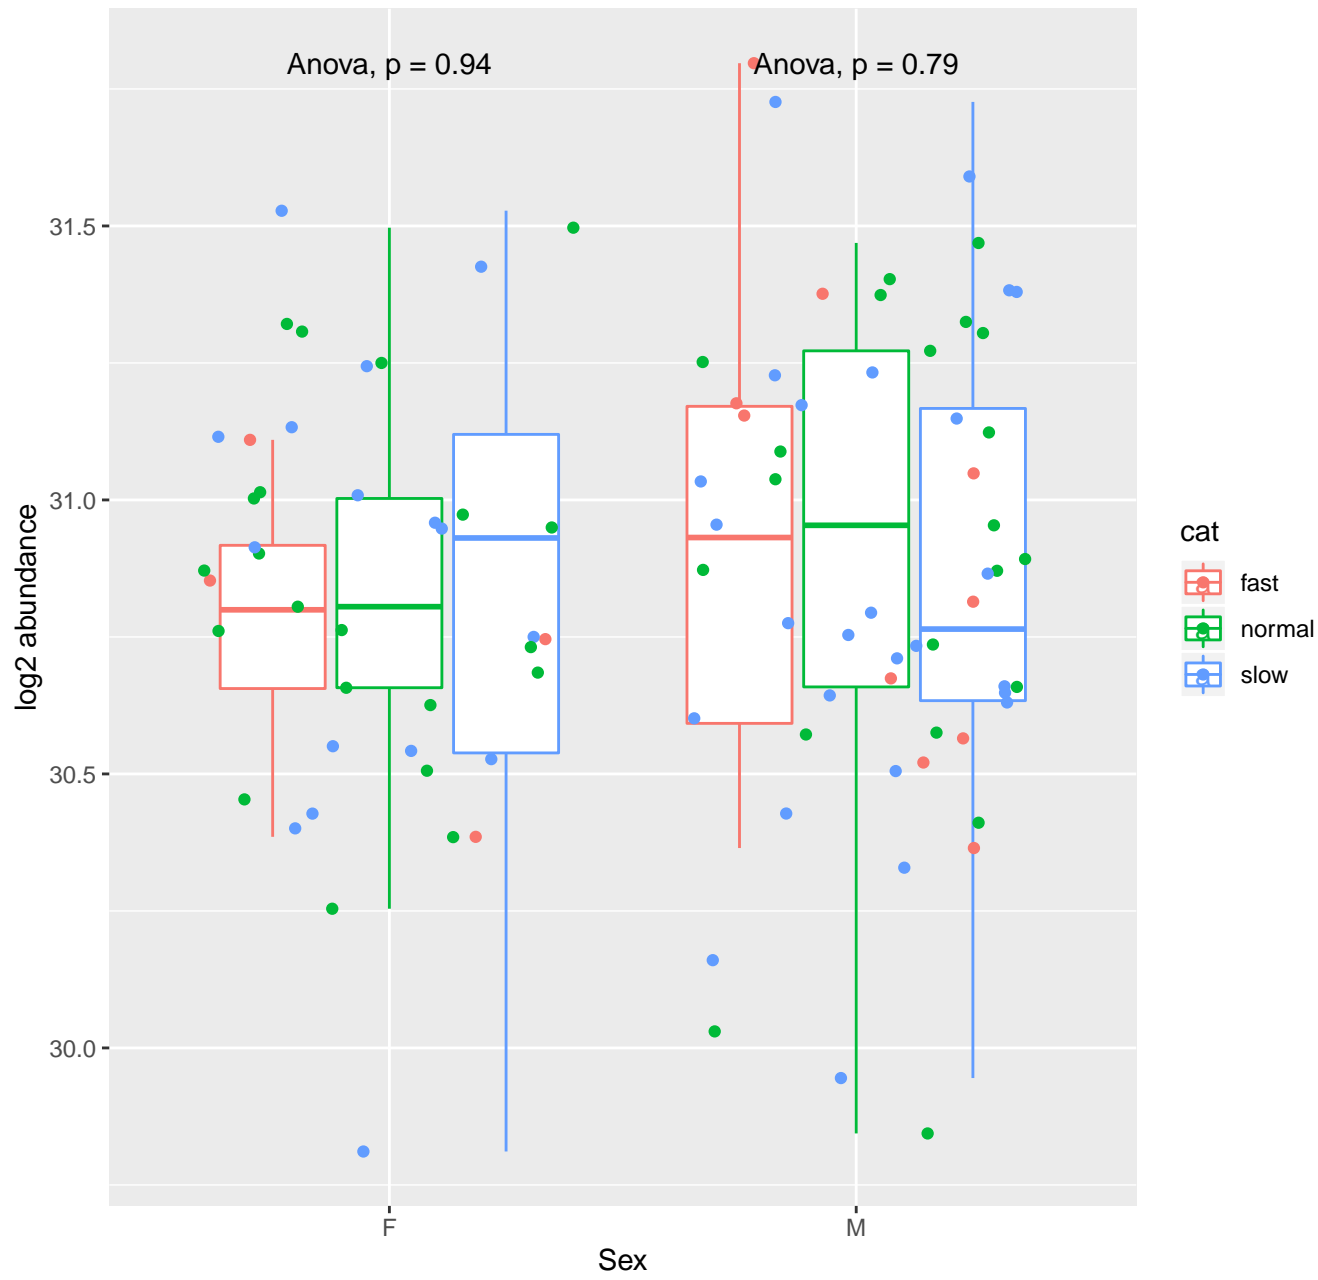

# Lysine

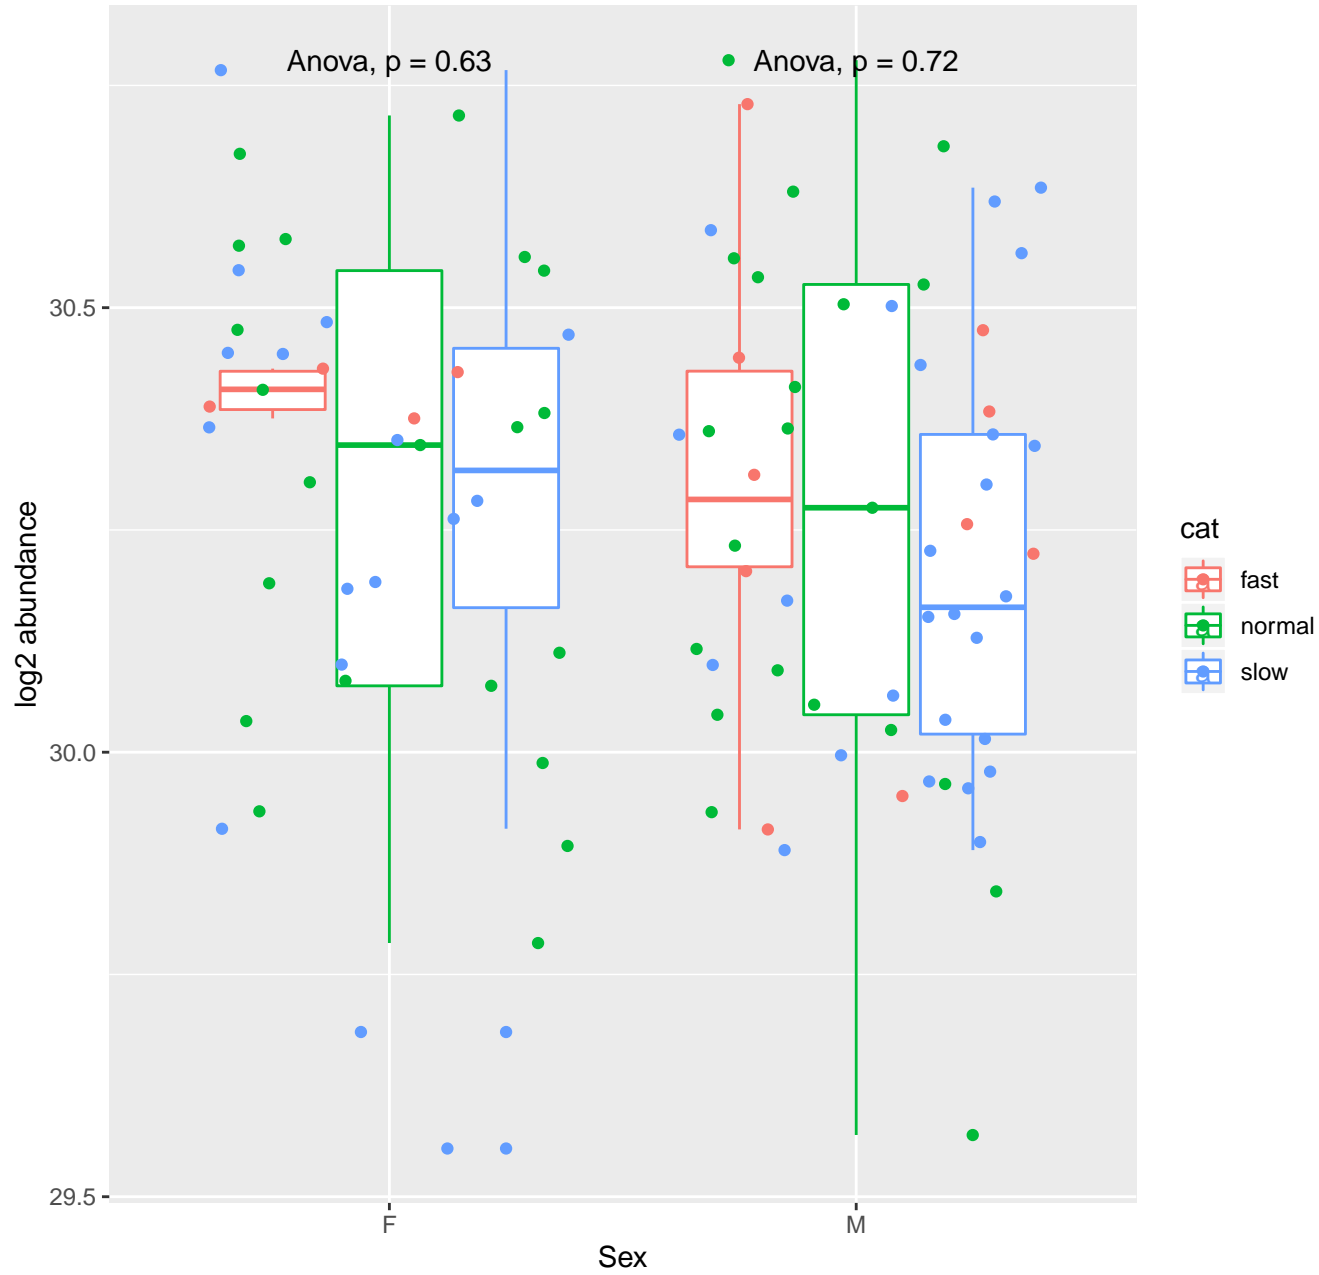

# Methionine

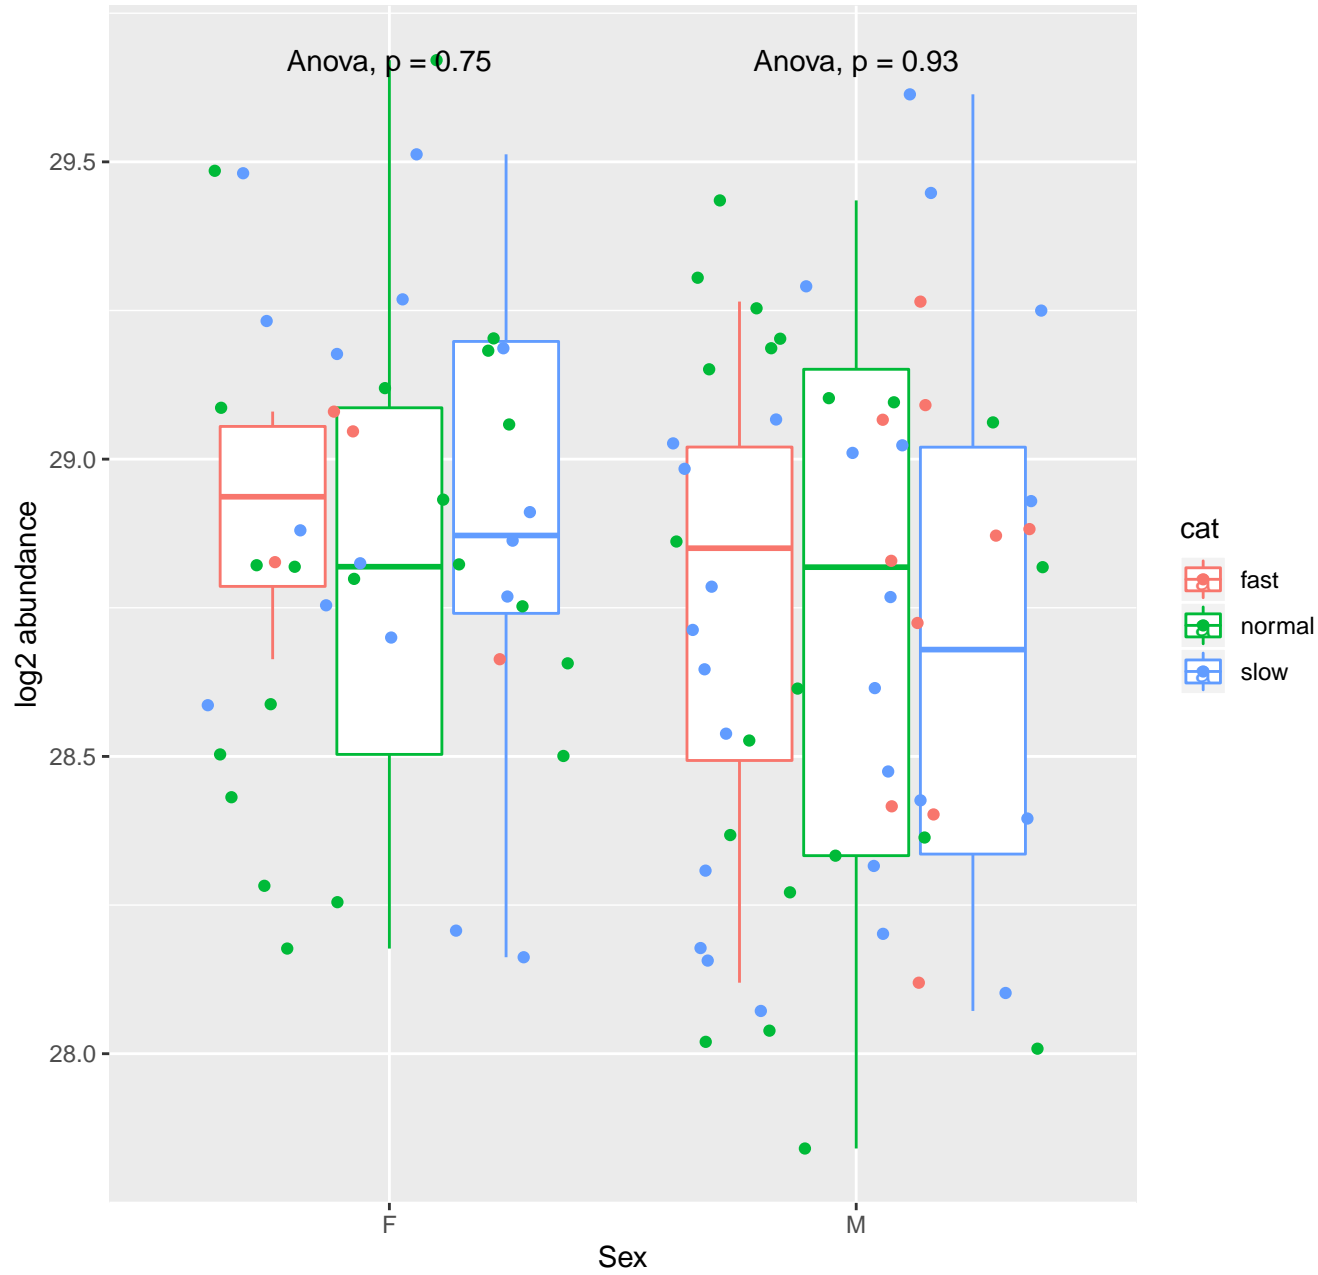

# Phenylalanine

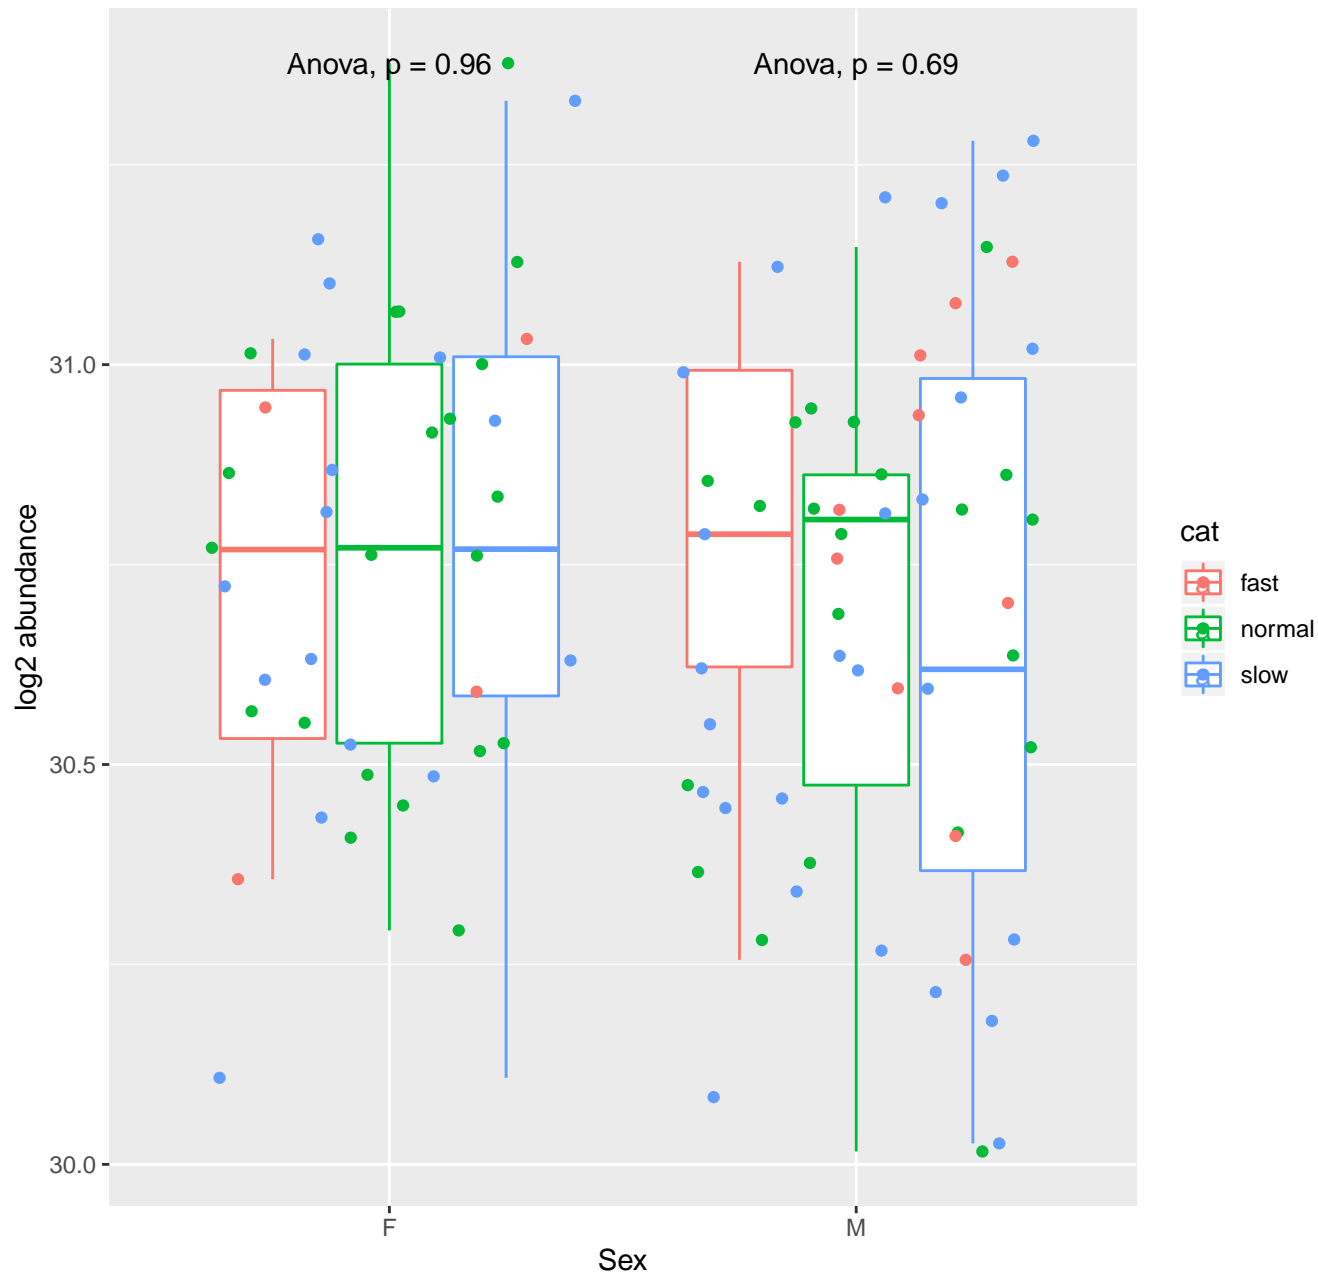

# Proline

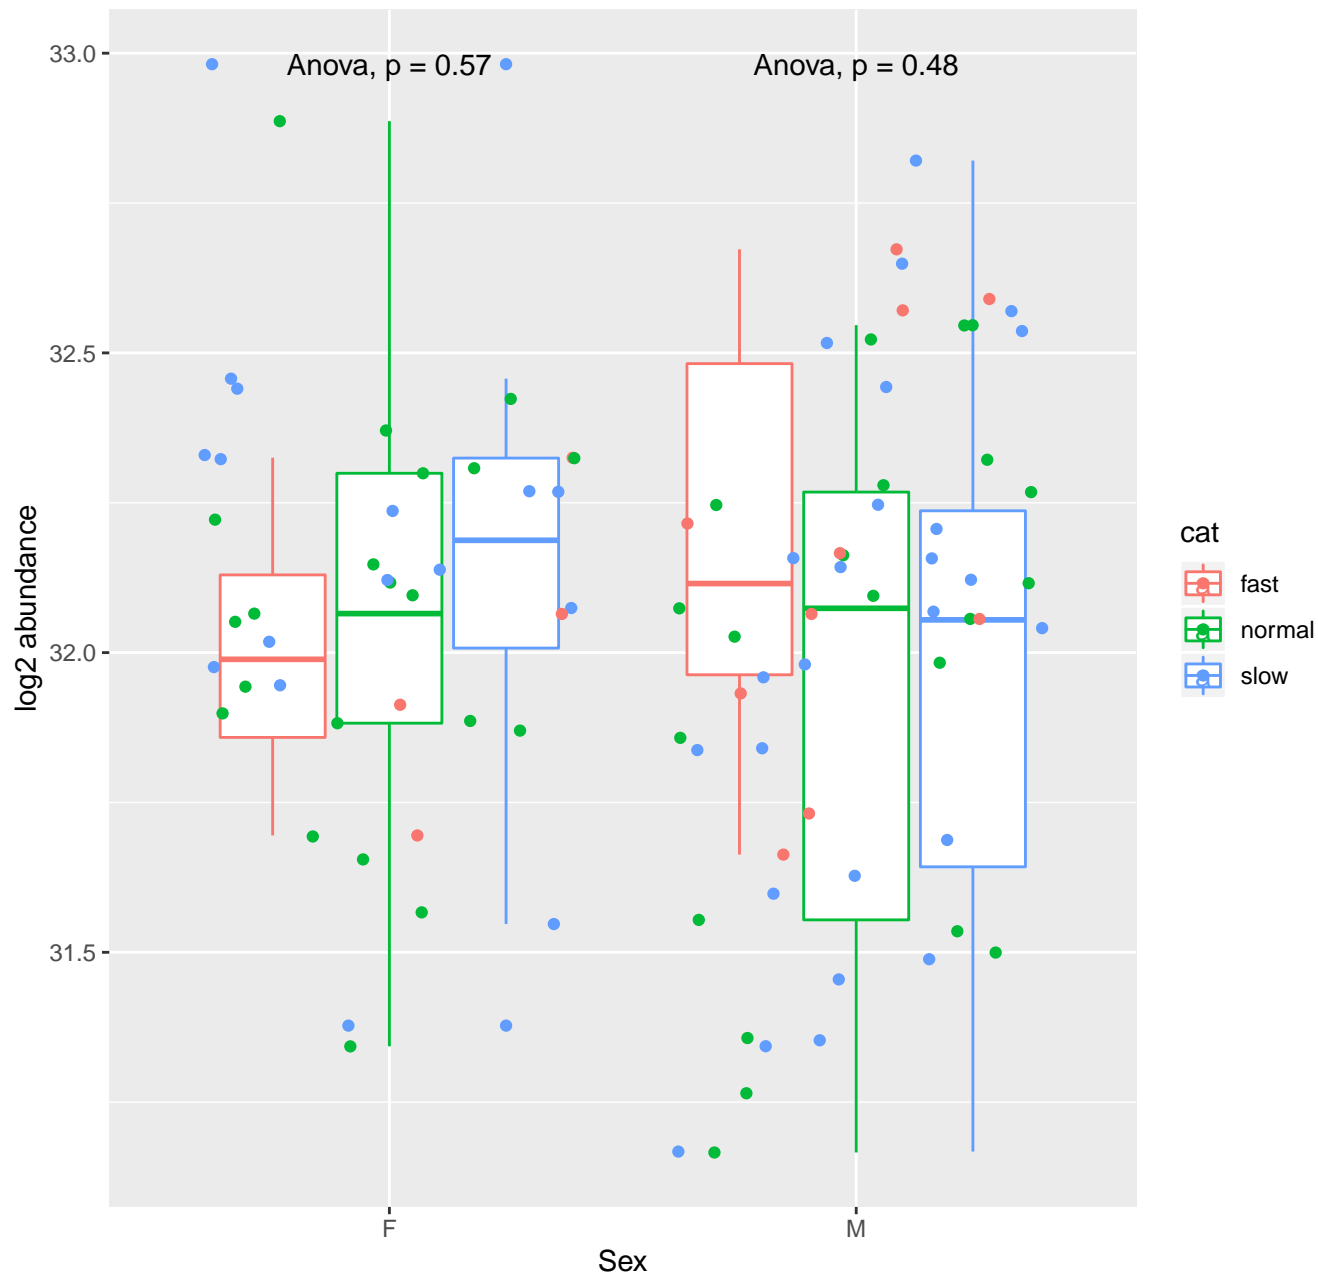

# Serine

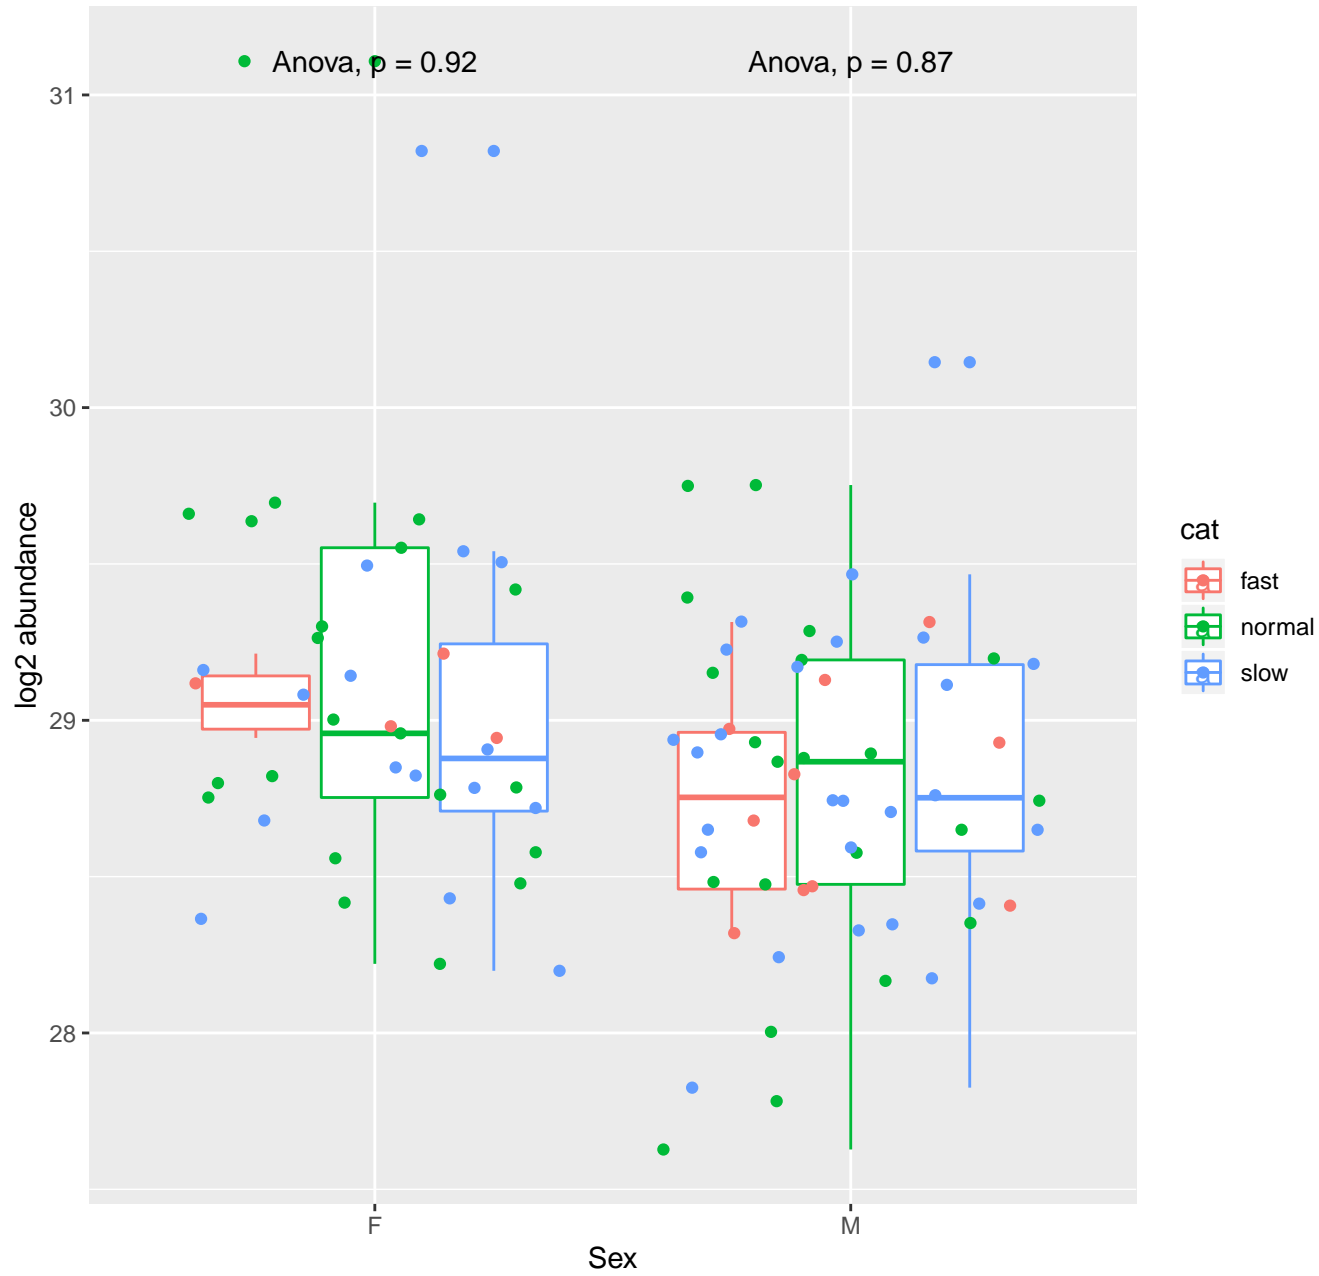



# Threonine

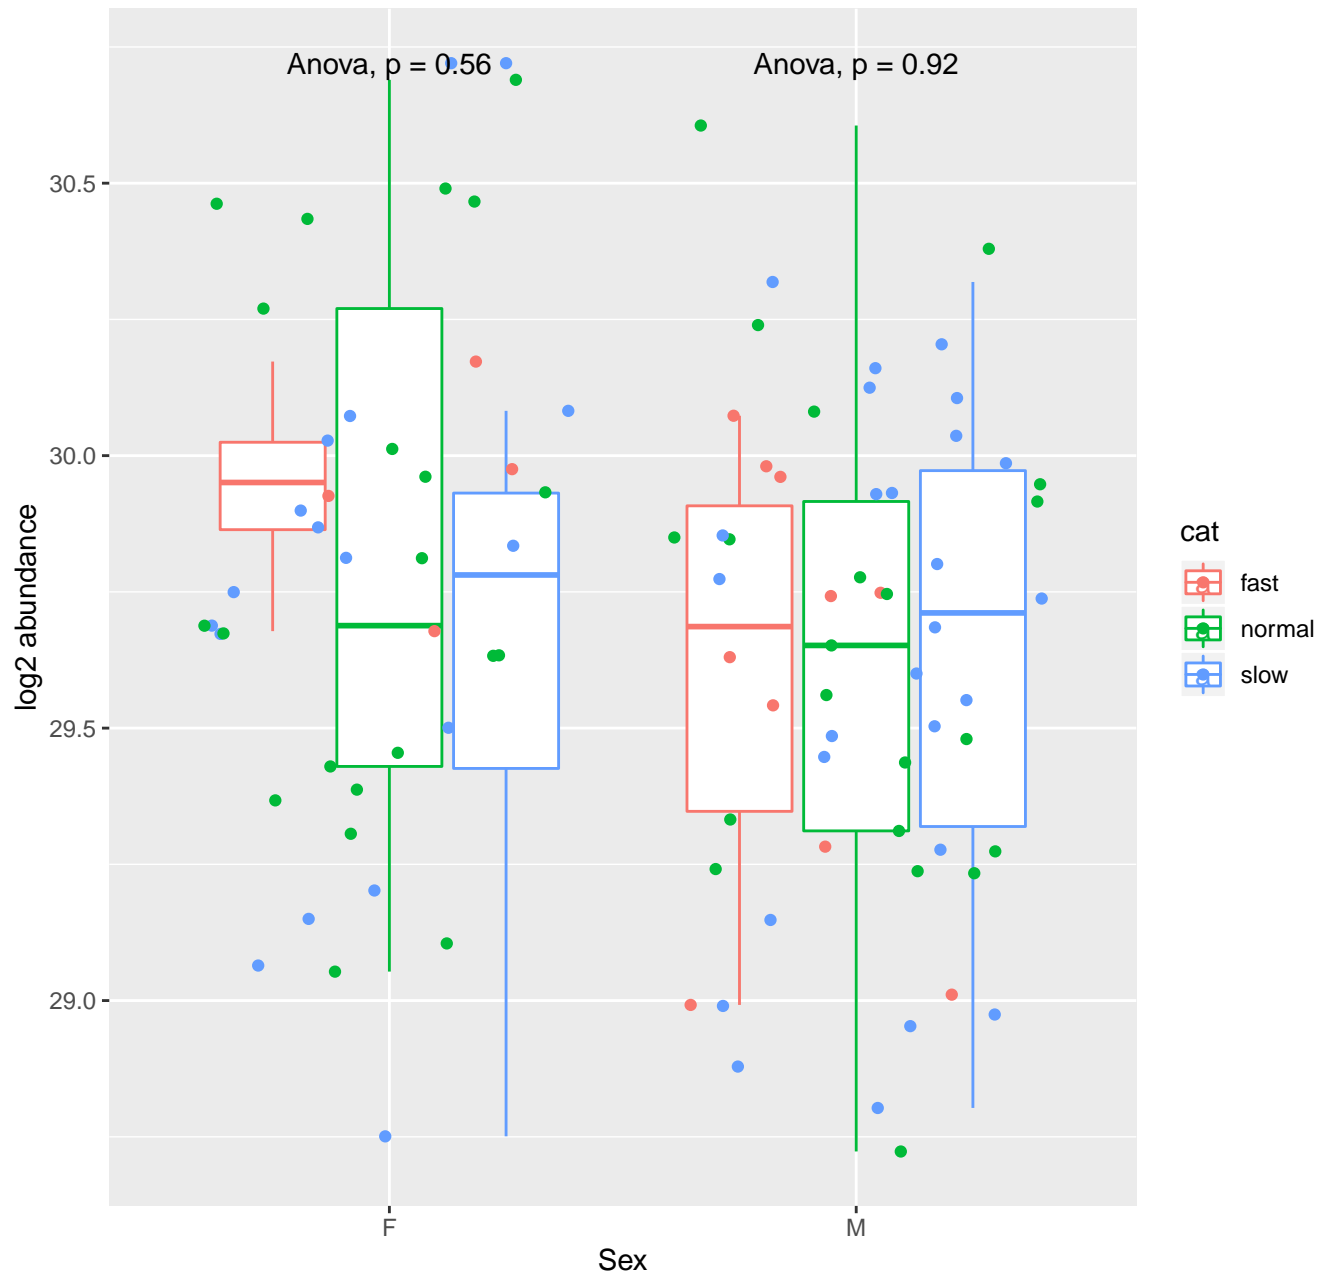

# Tryptophan

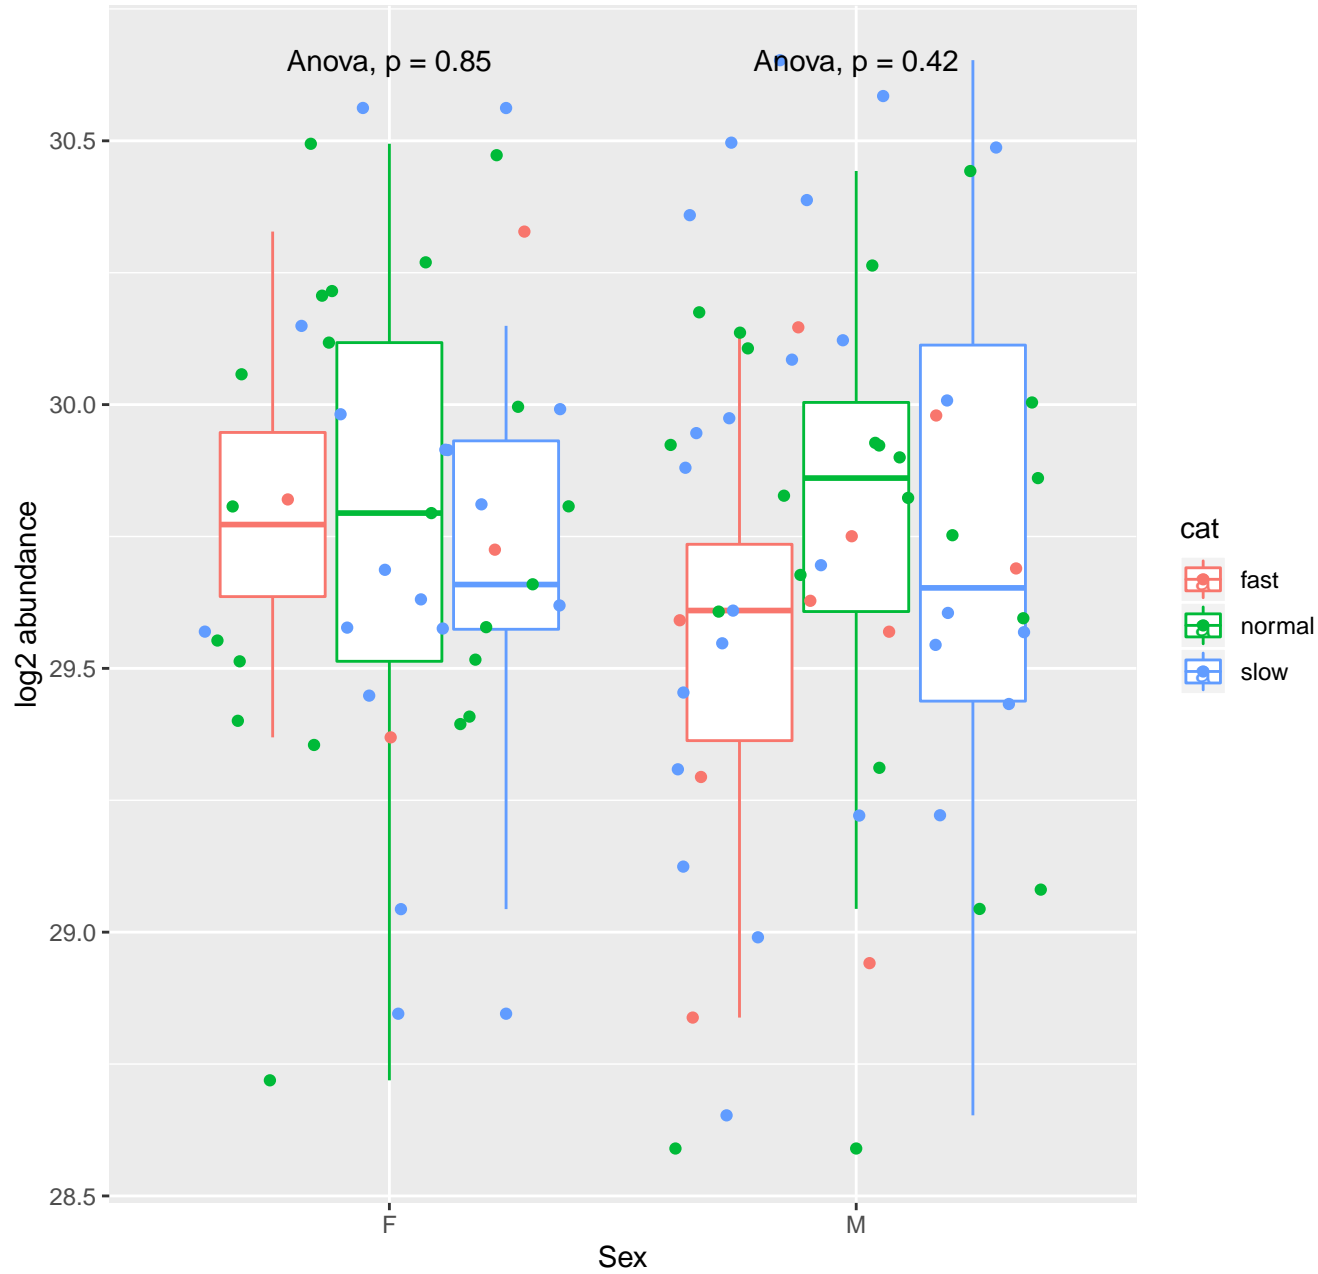

# Tyrosine

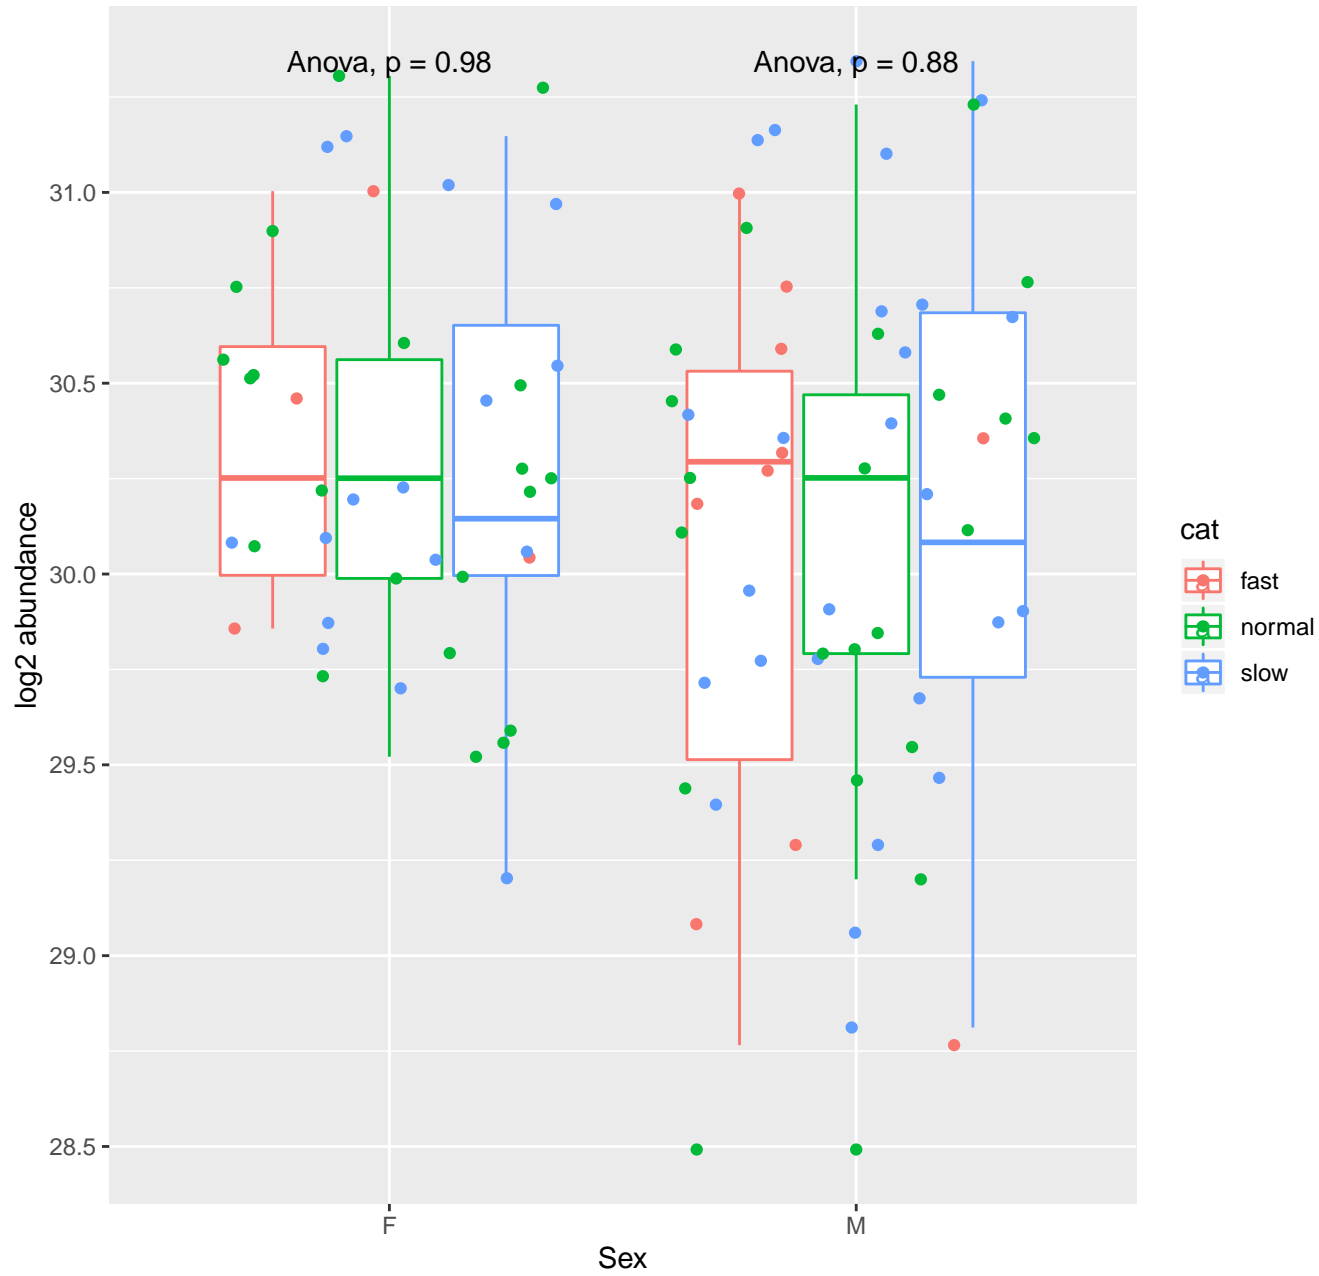

# Valine

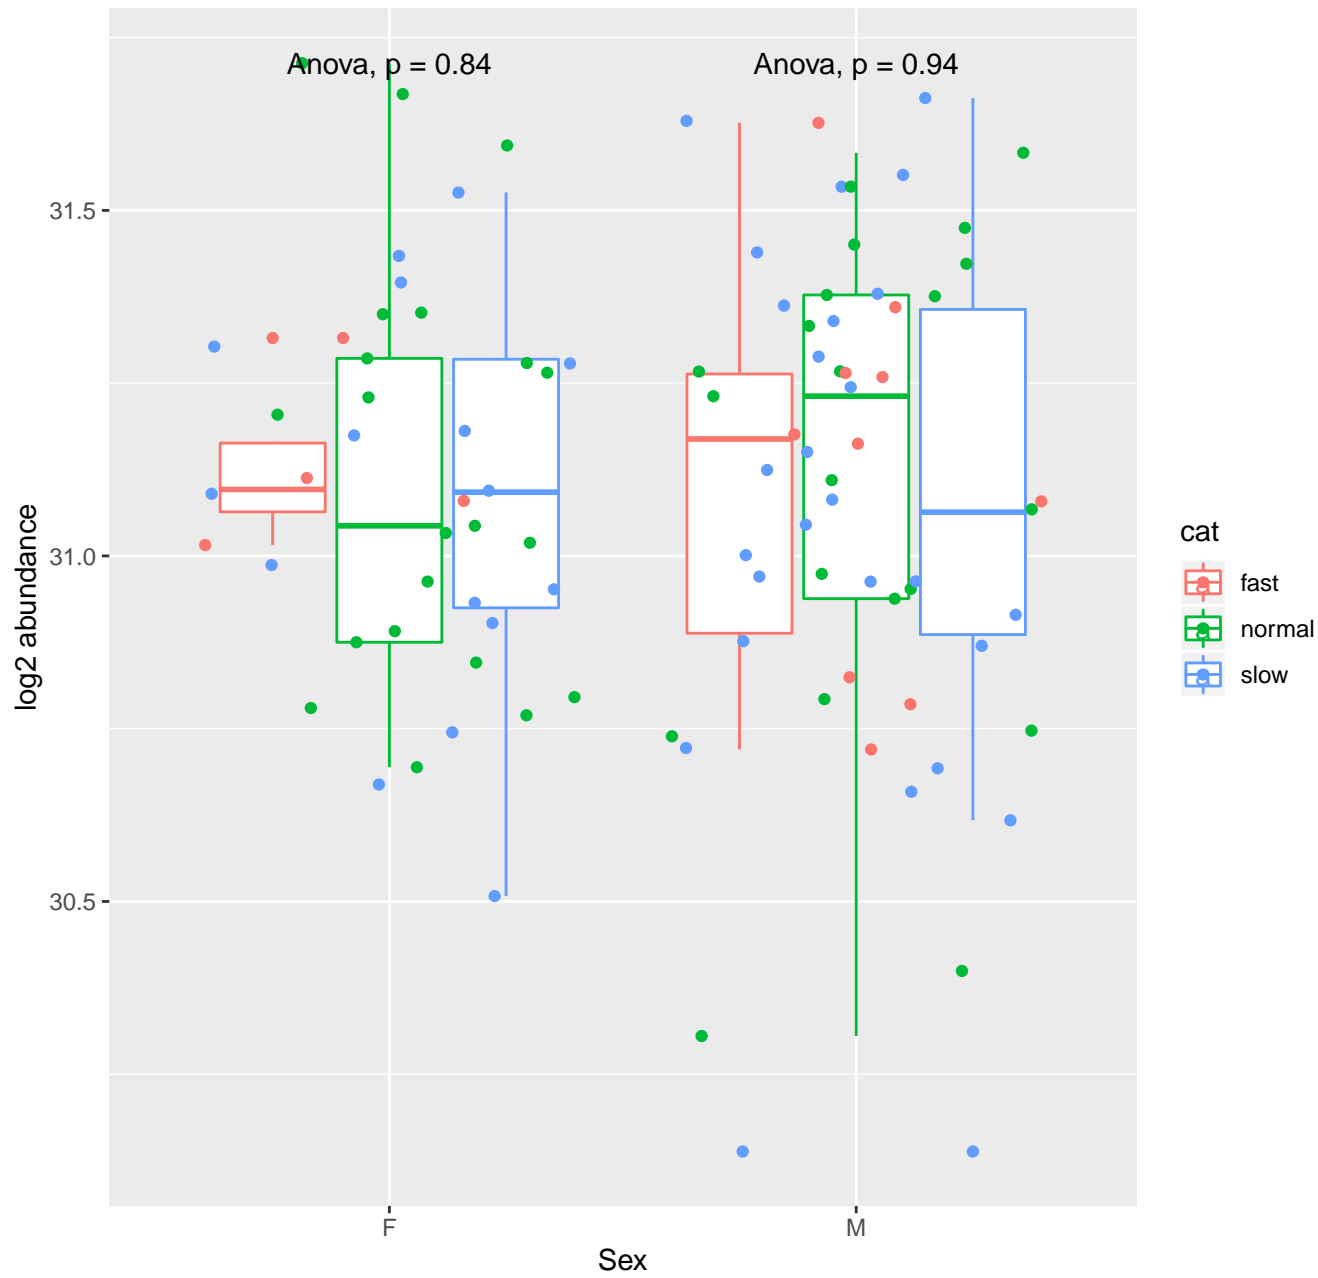

# Choline

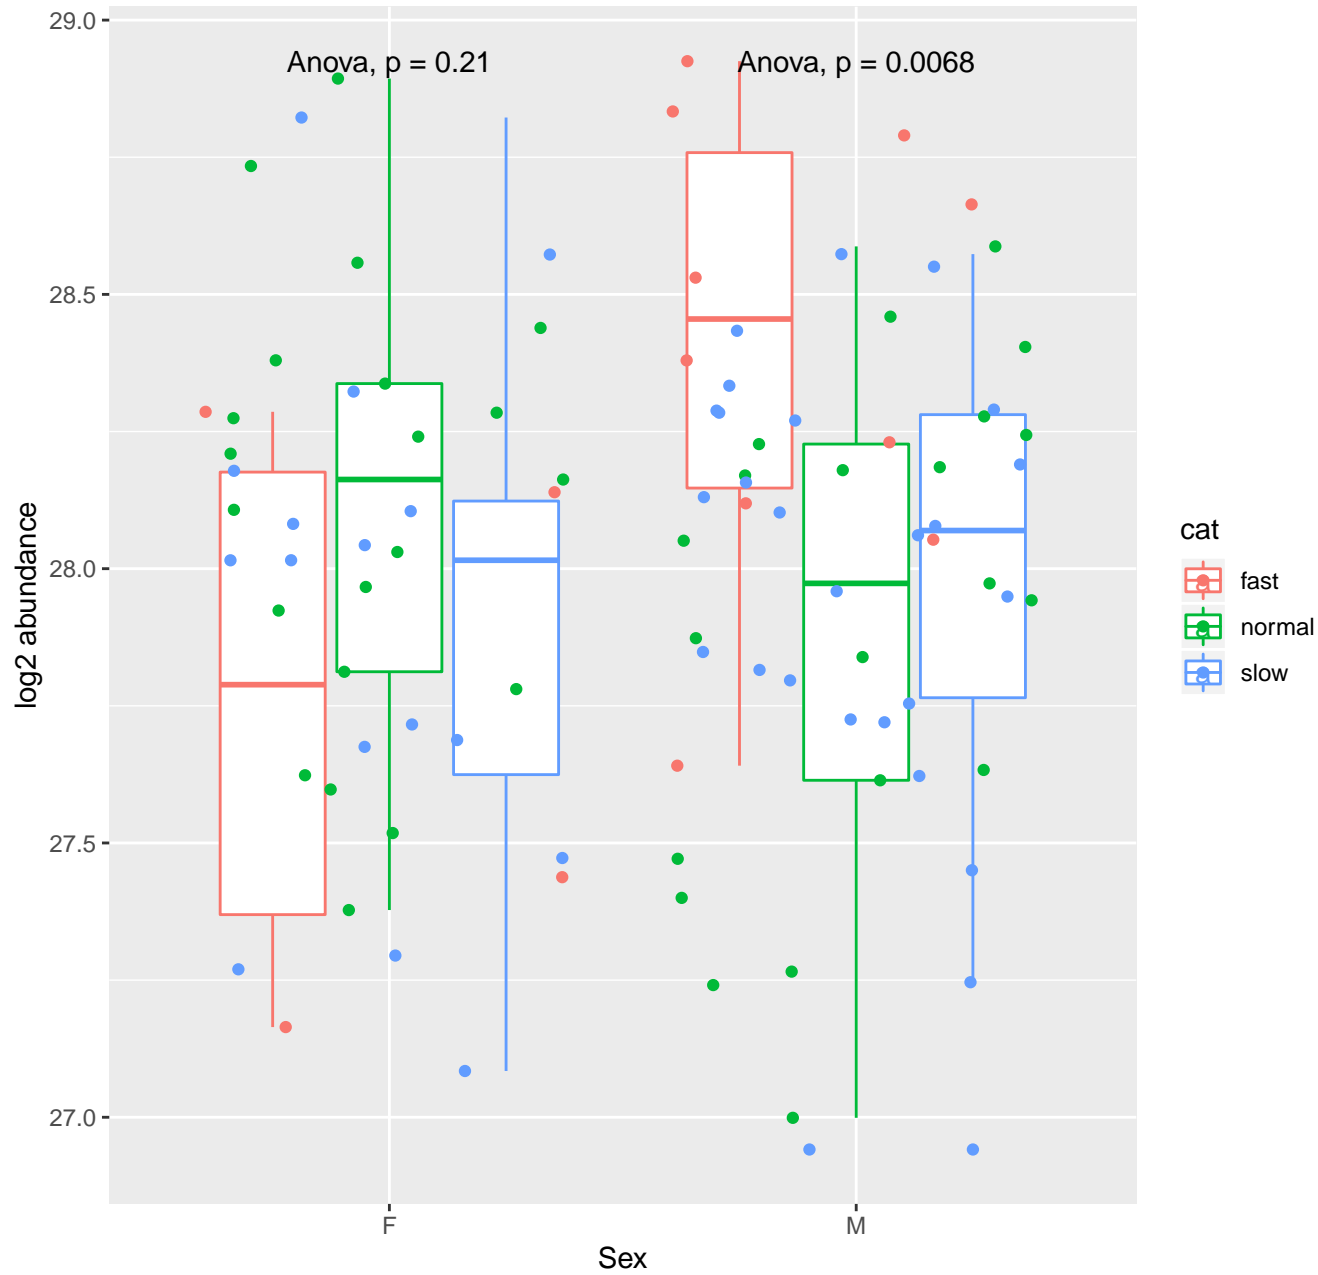

# Betaine

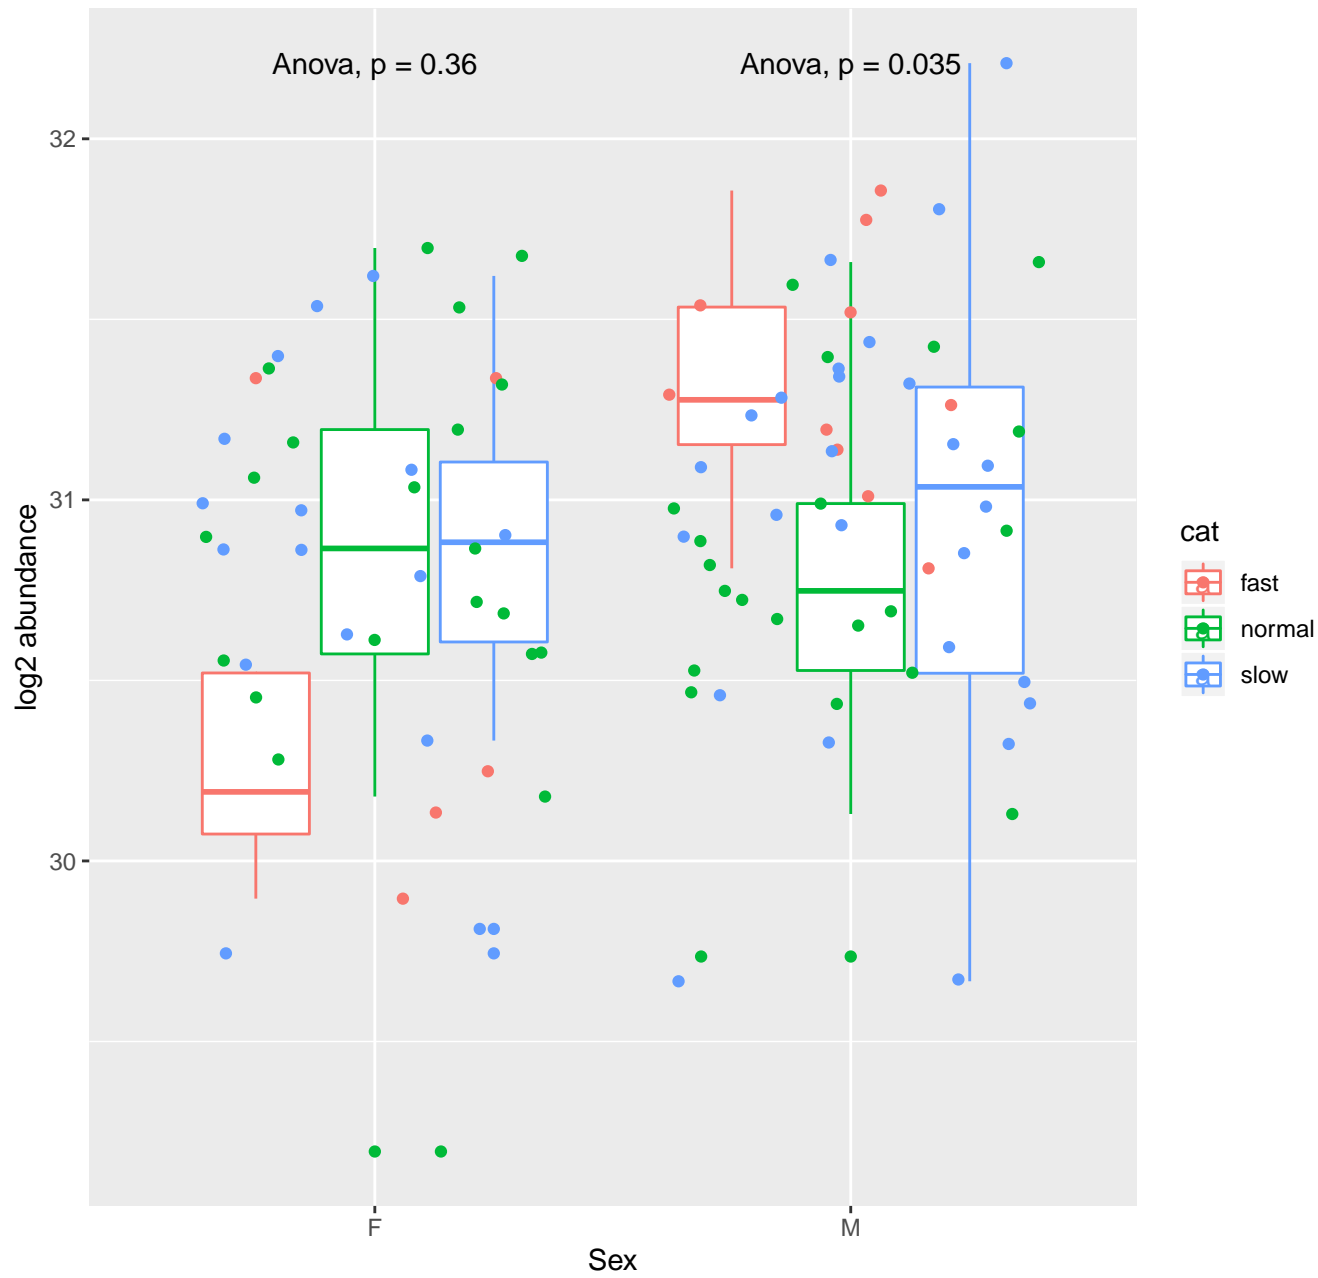

# Creatinine

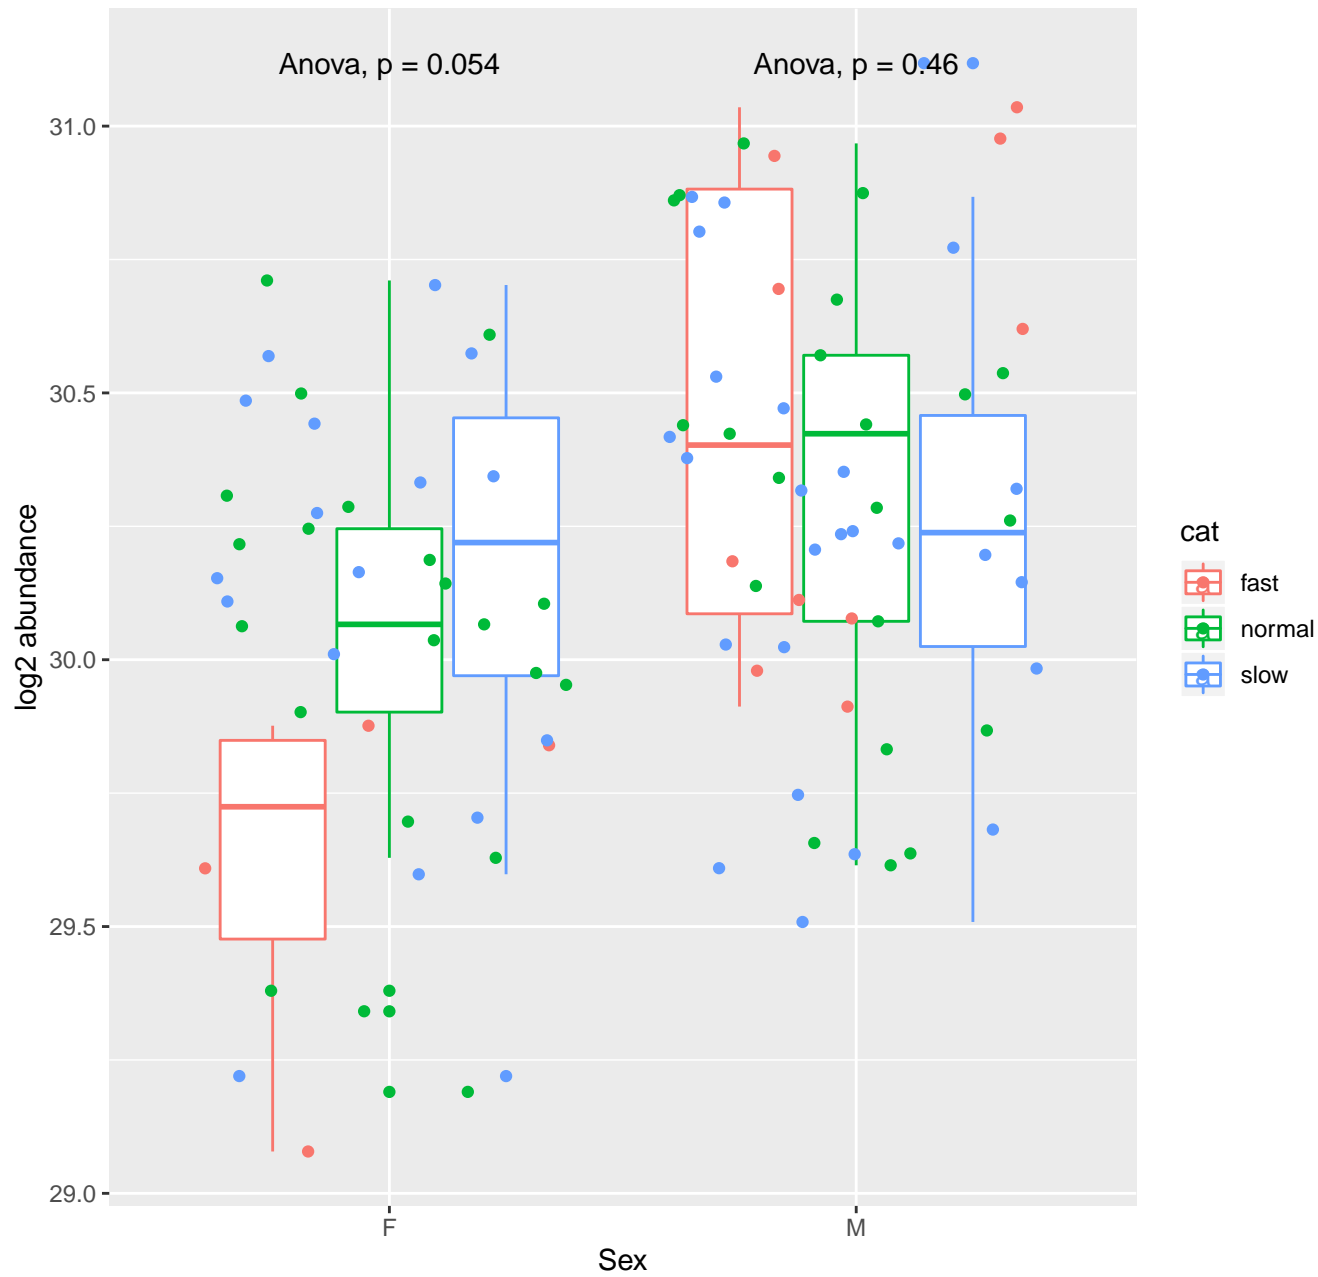

# Creatine

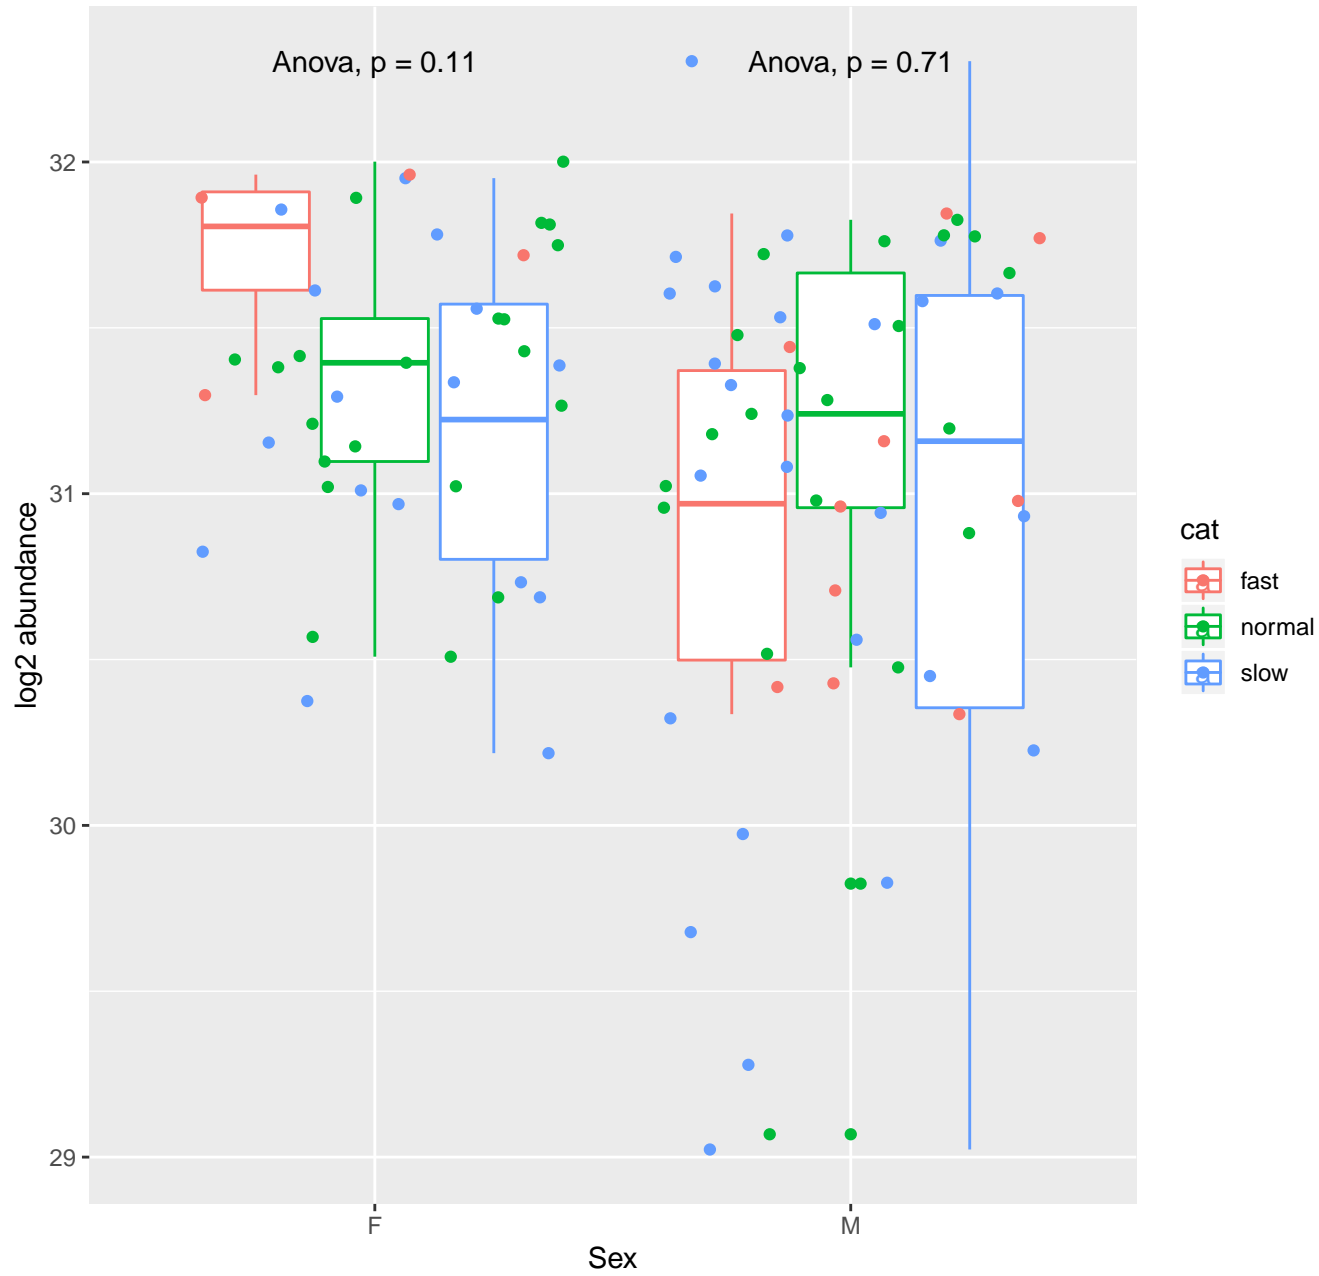



# Carnitine

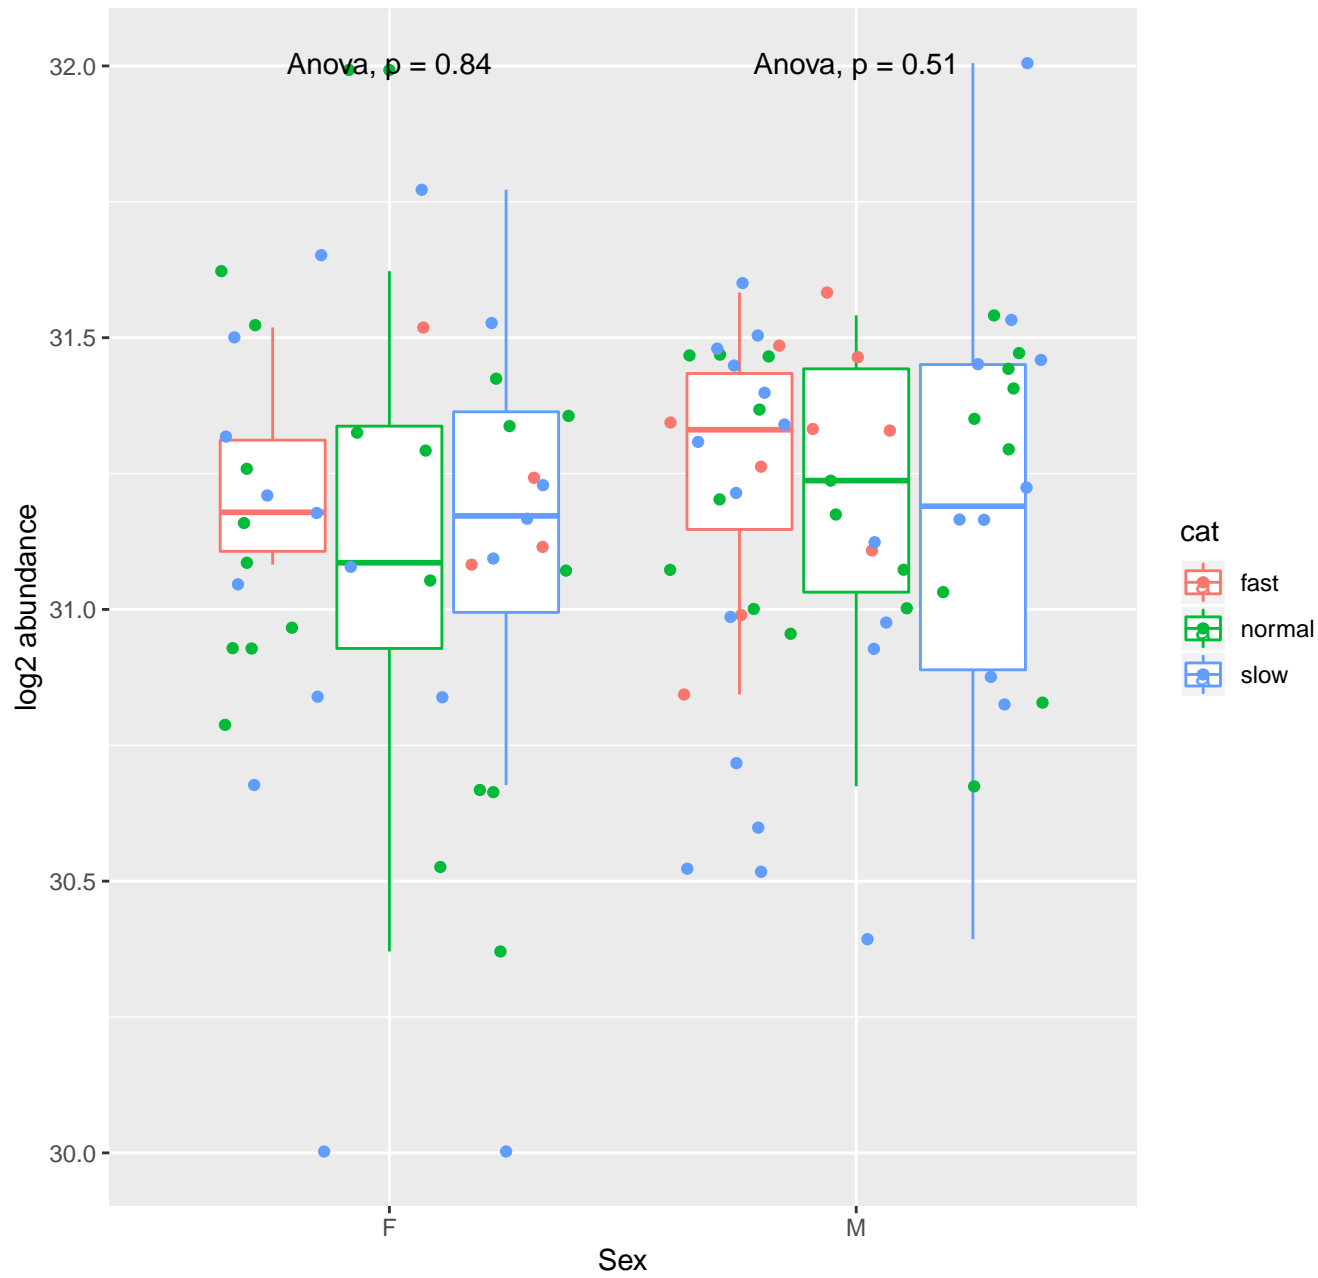

# Methylhistidine

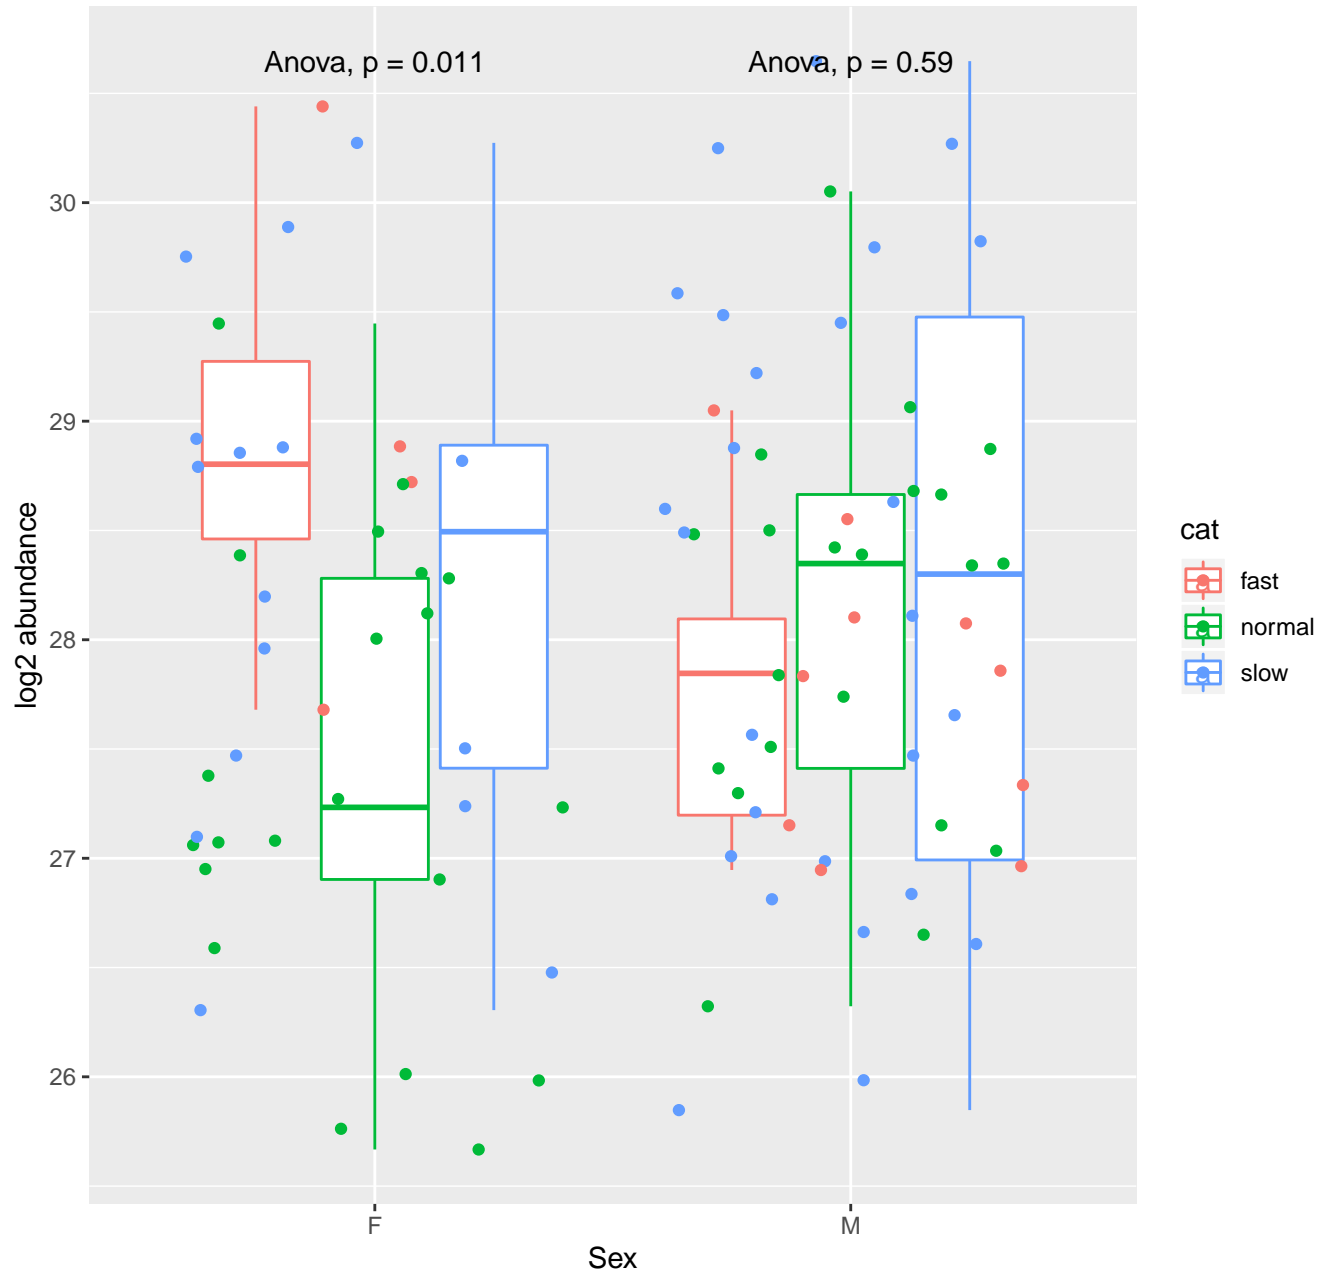

# Citrulline

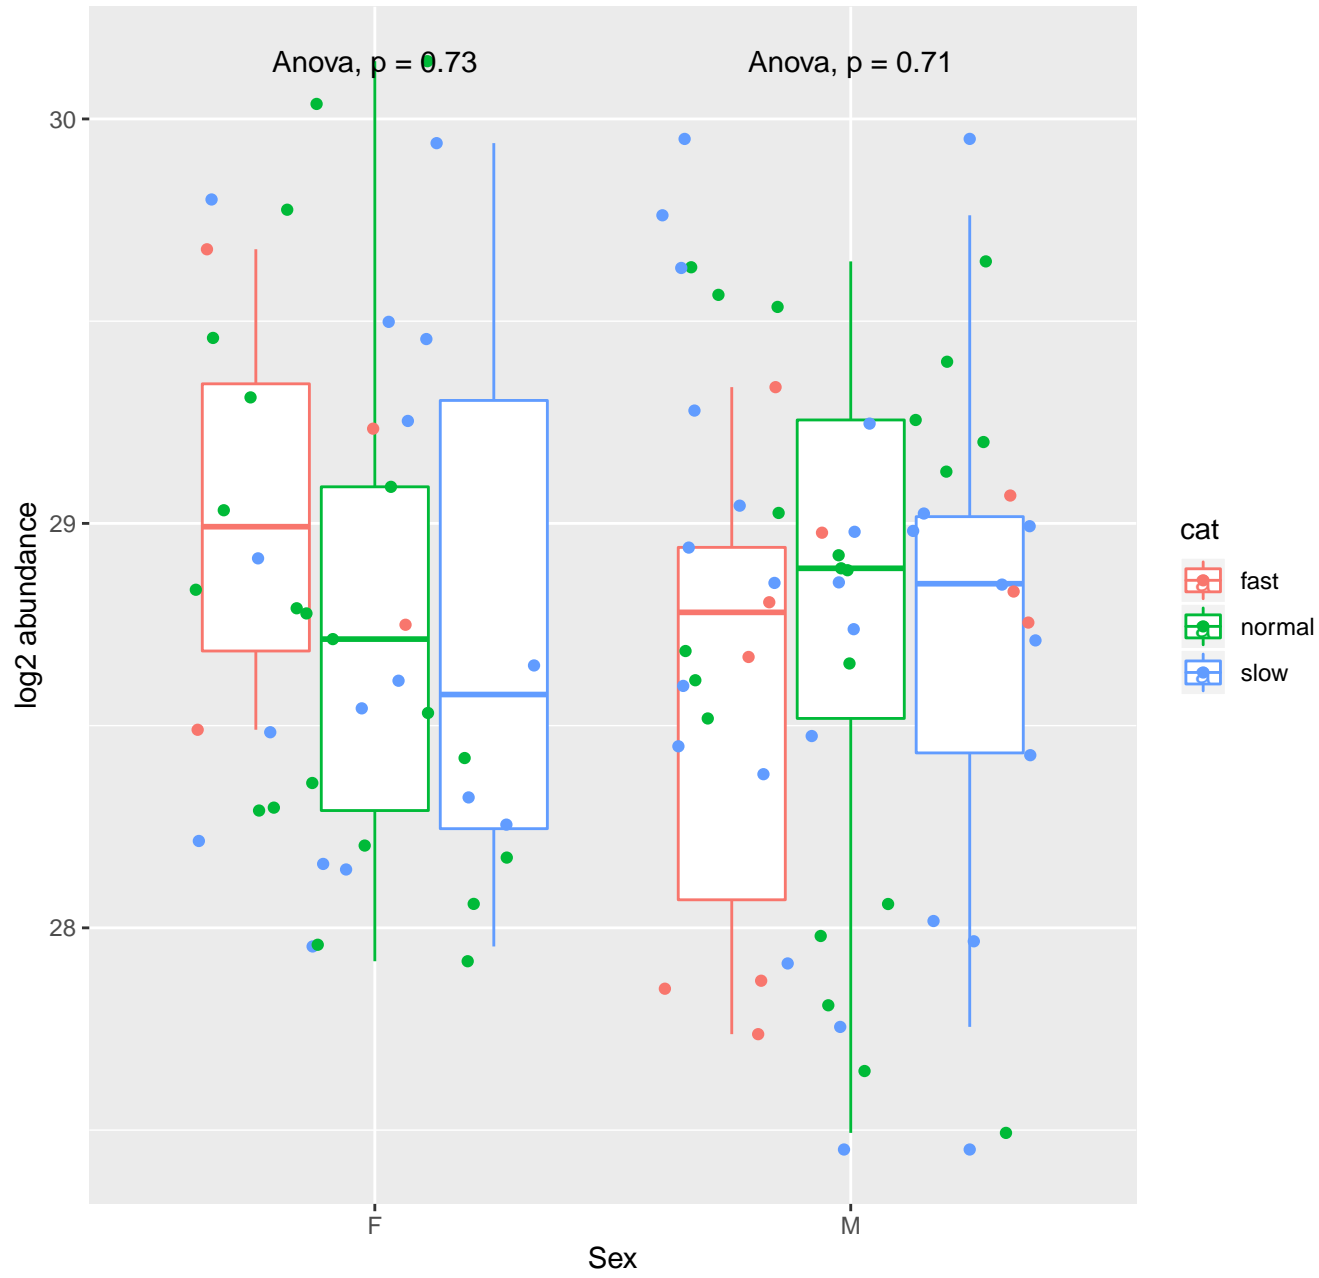

# Dihydrothymine

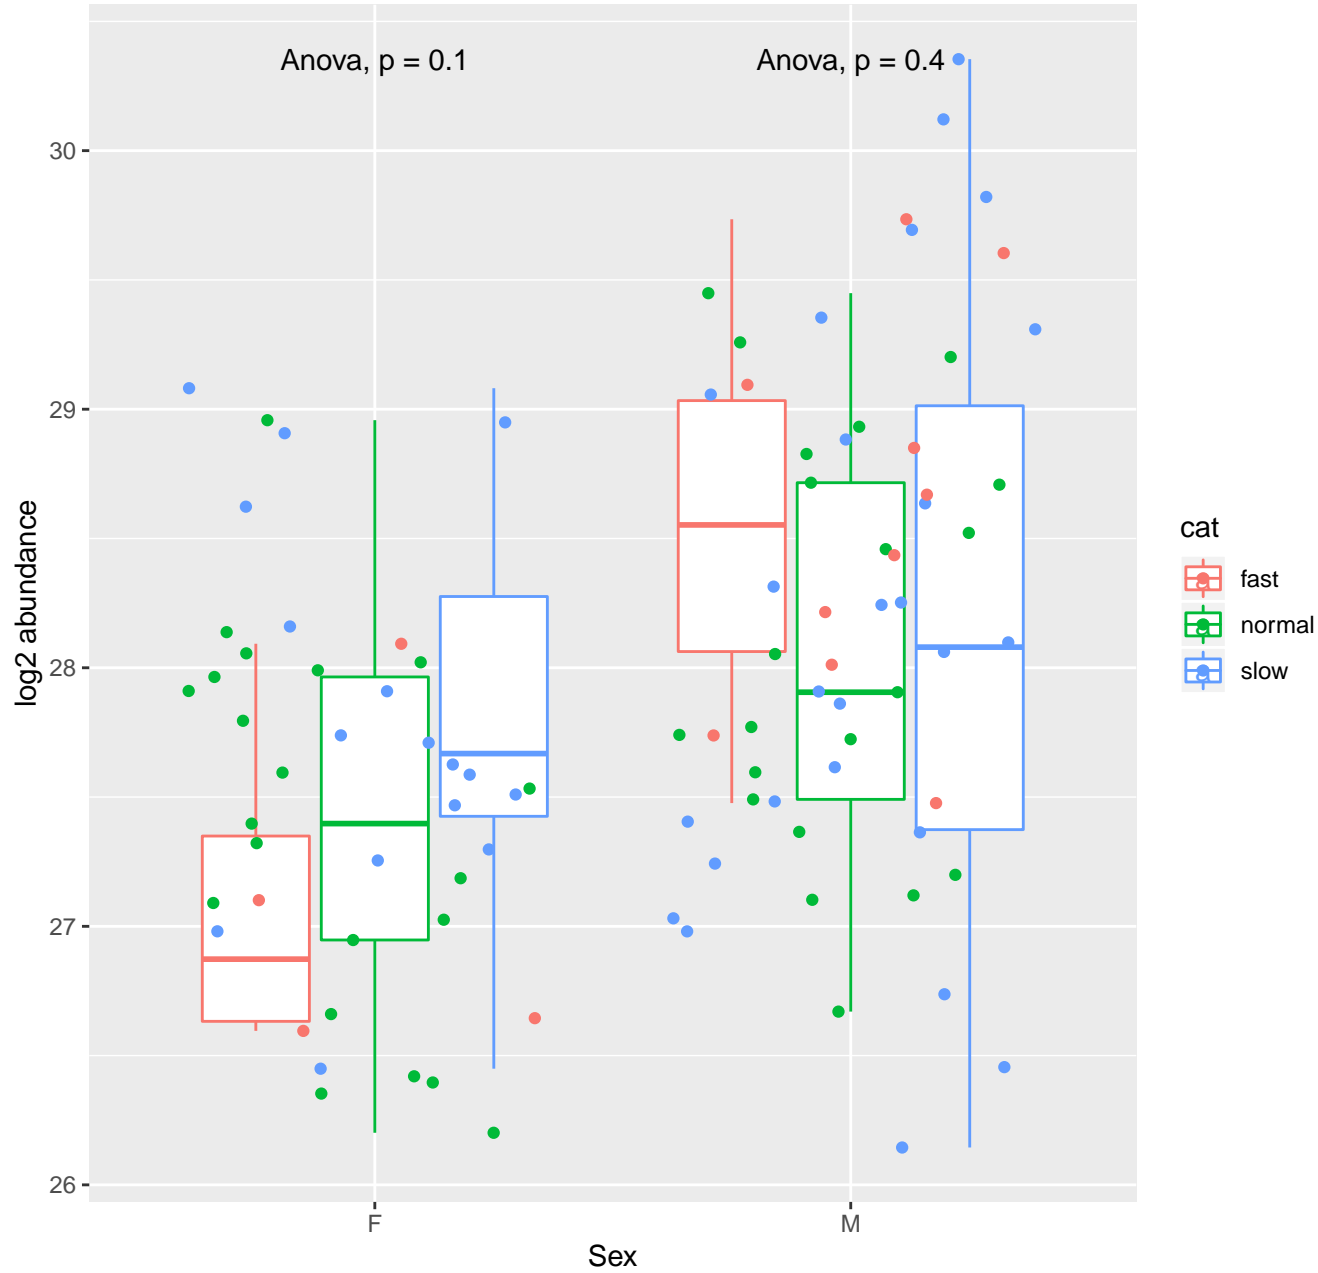

# Acetylcarnitine

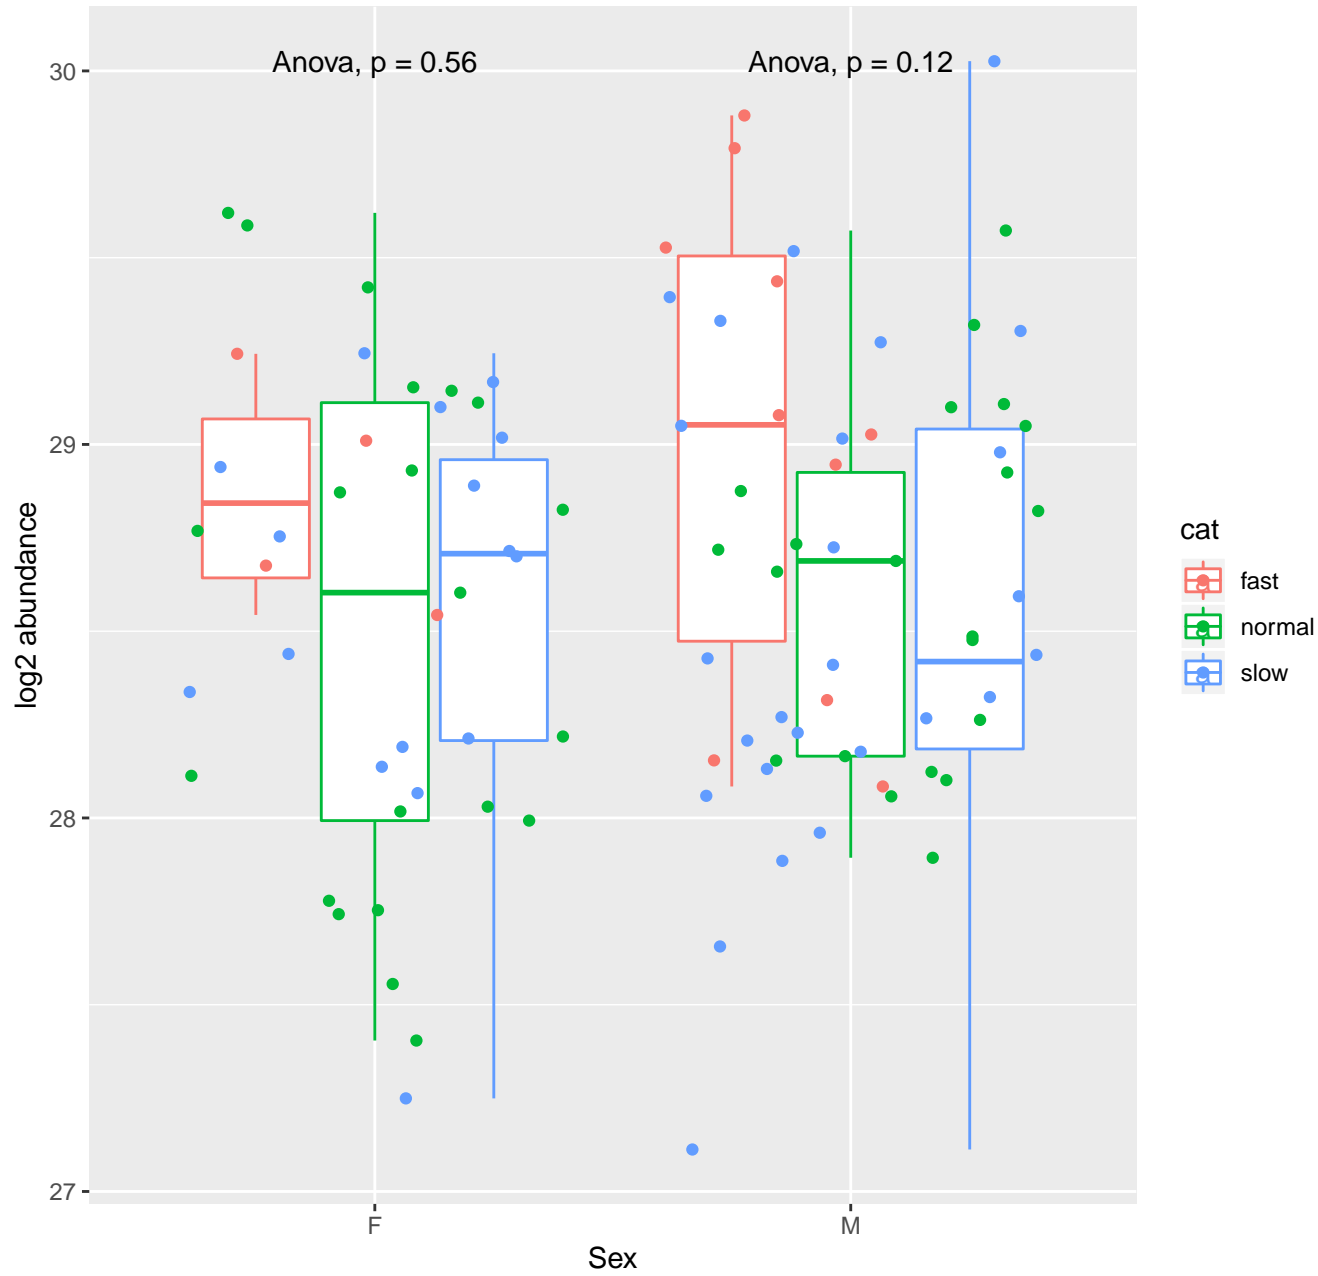

# Pyroglutamic.Acid

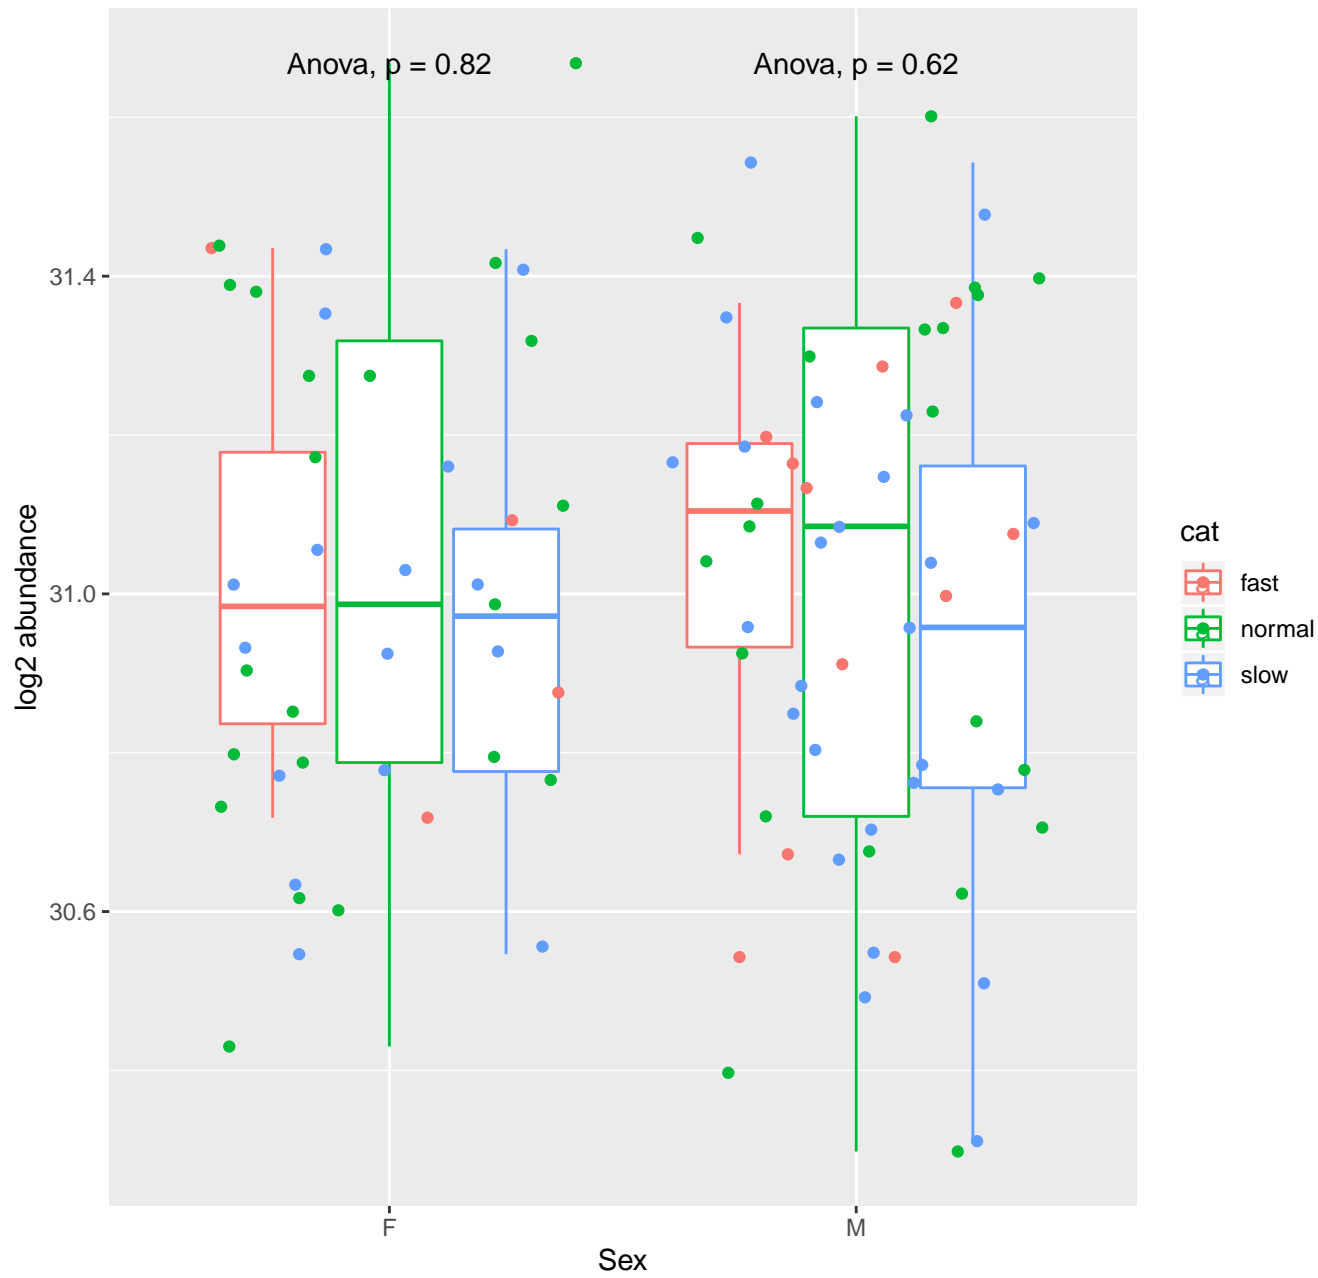

# Stachydrine

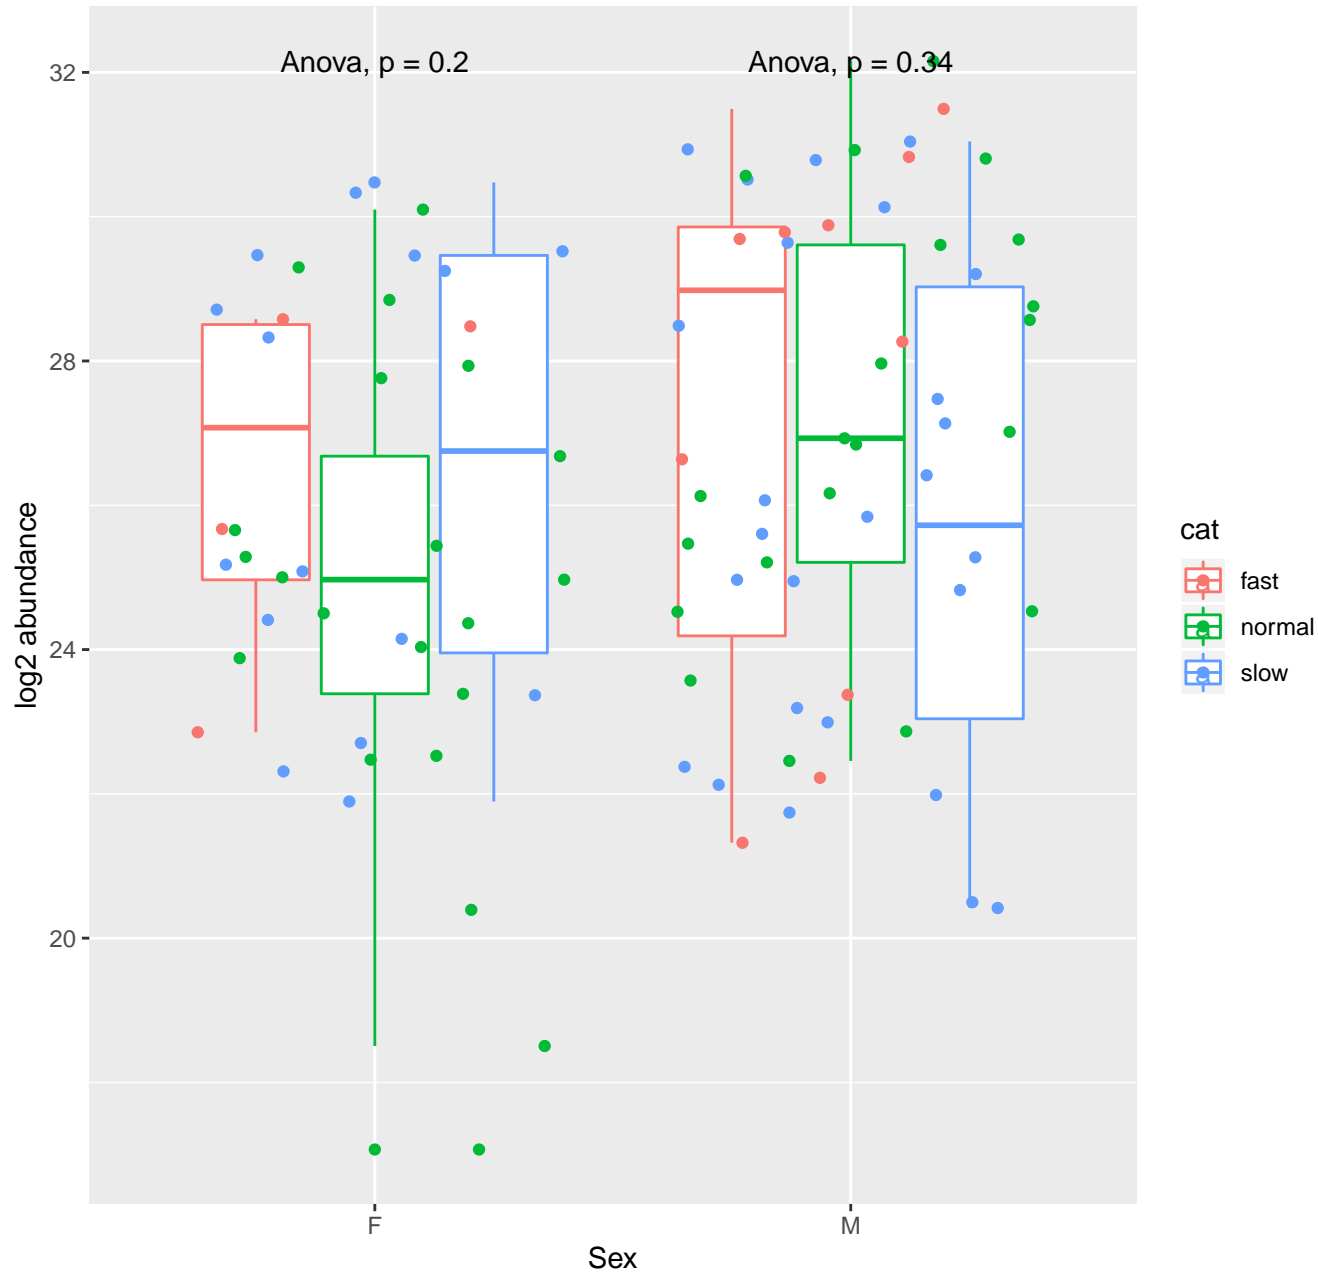

# Hydroxyproline

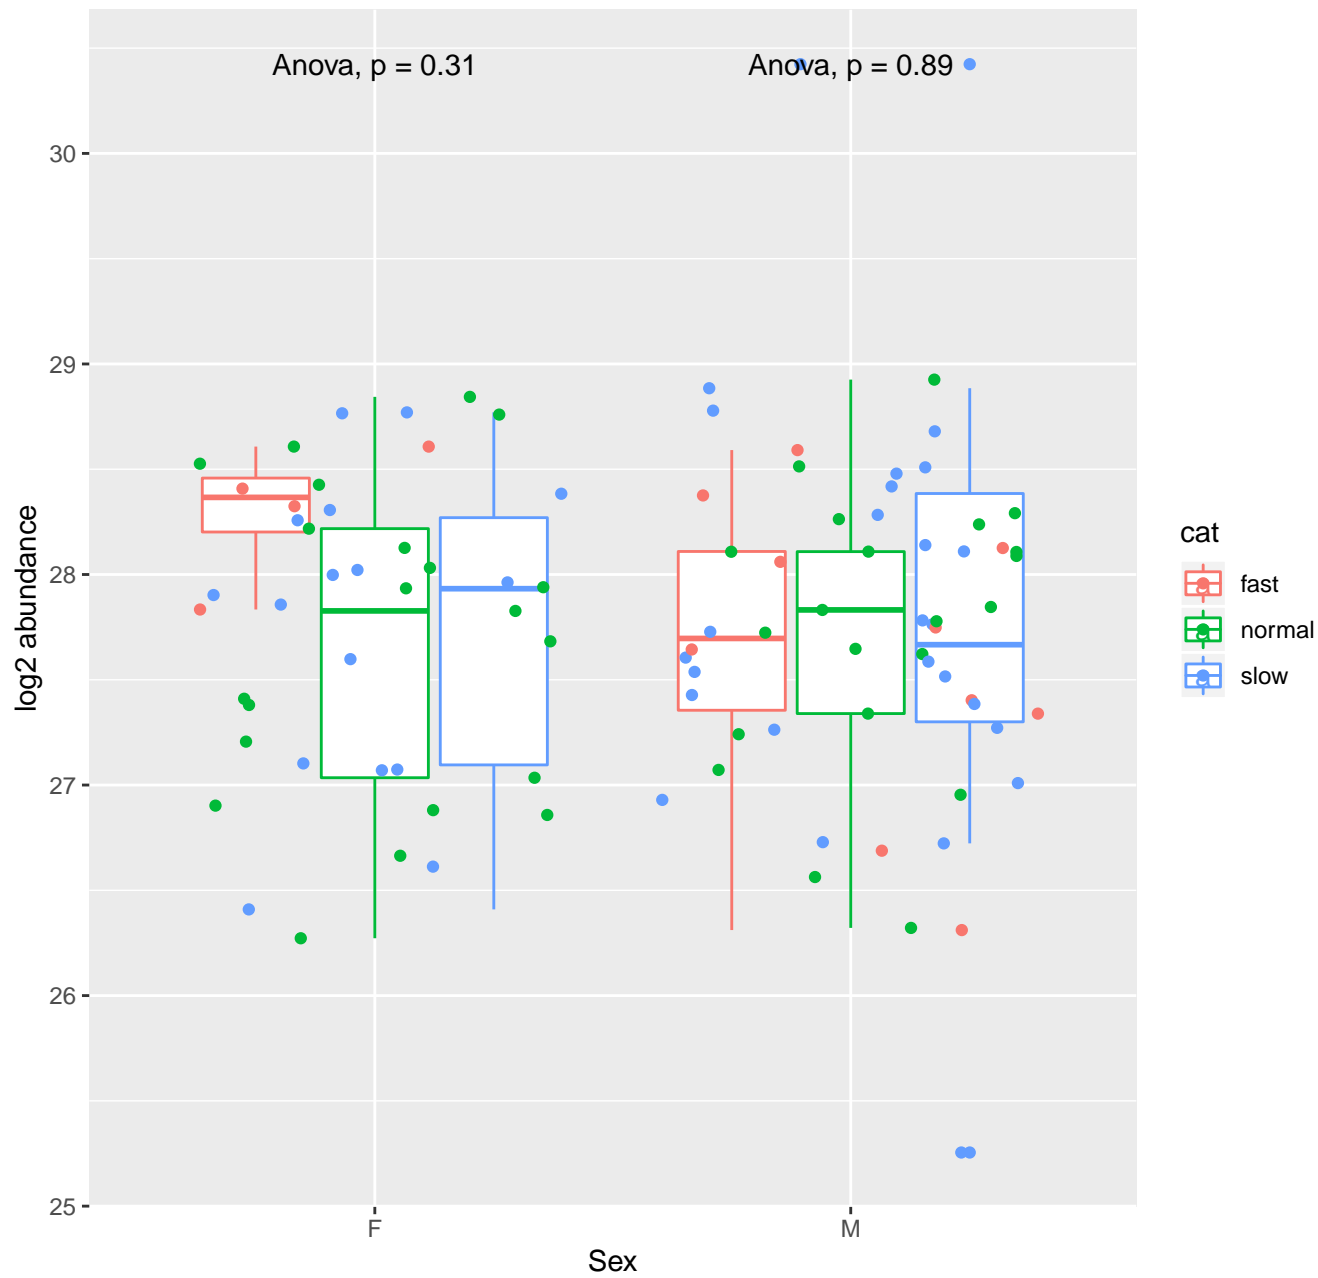



X130.0869.m.z

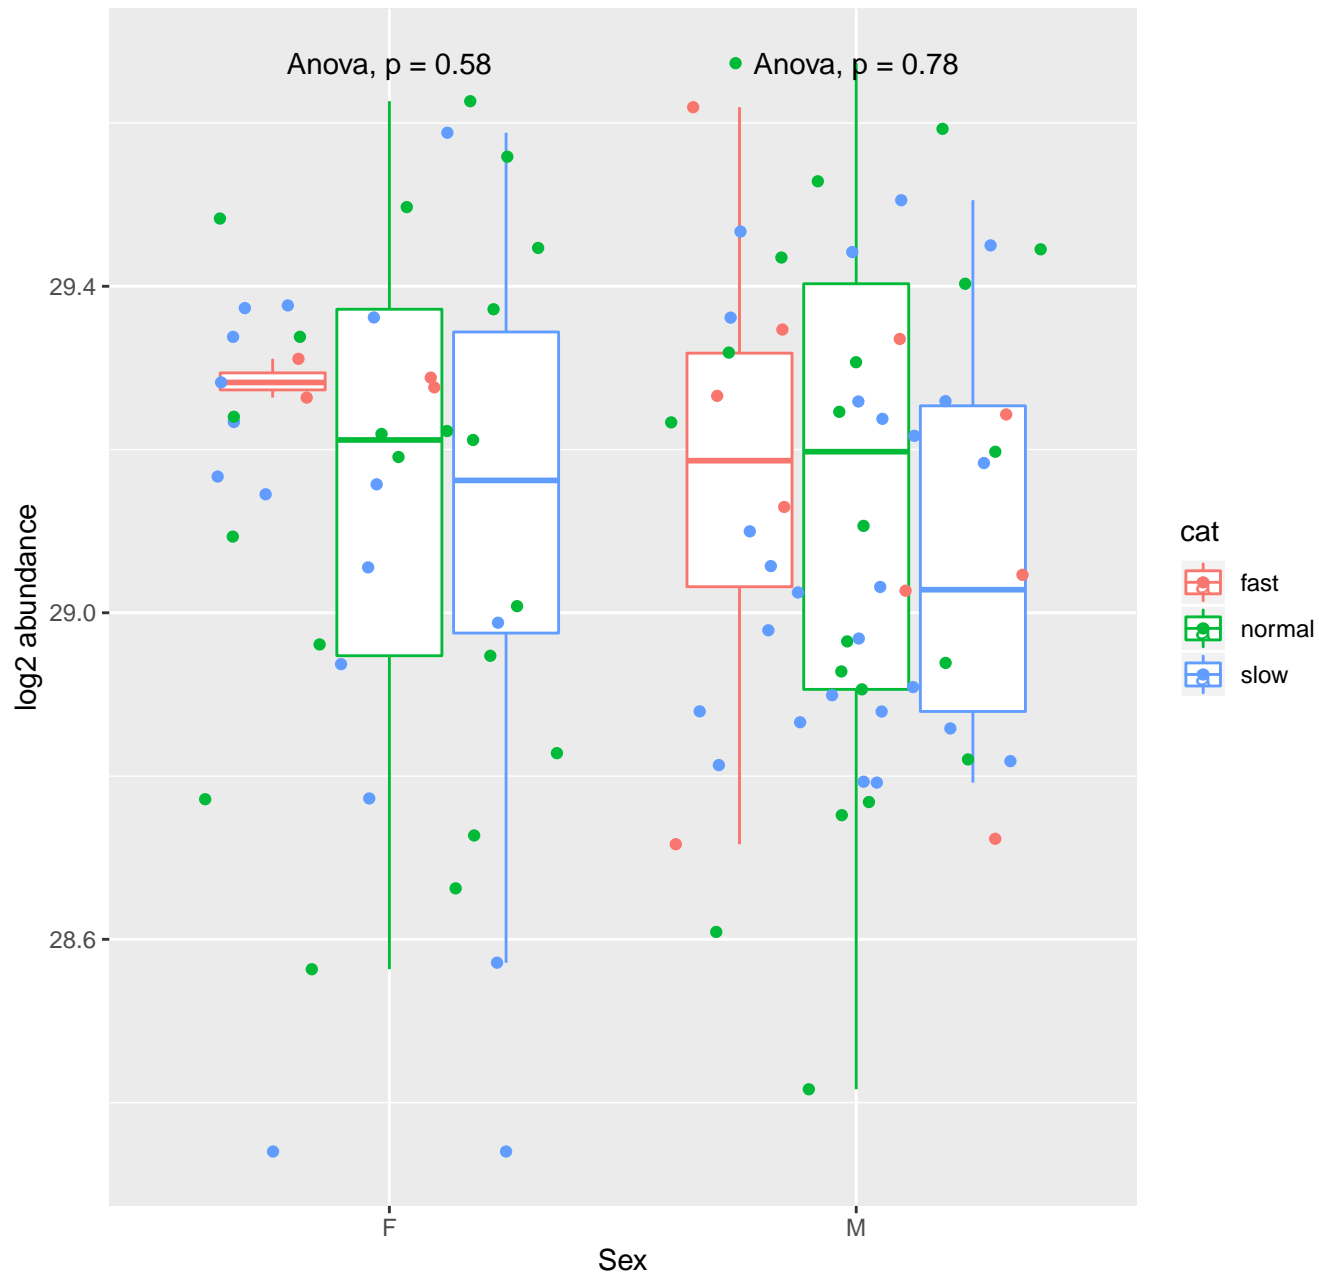

X123.0560.m.z

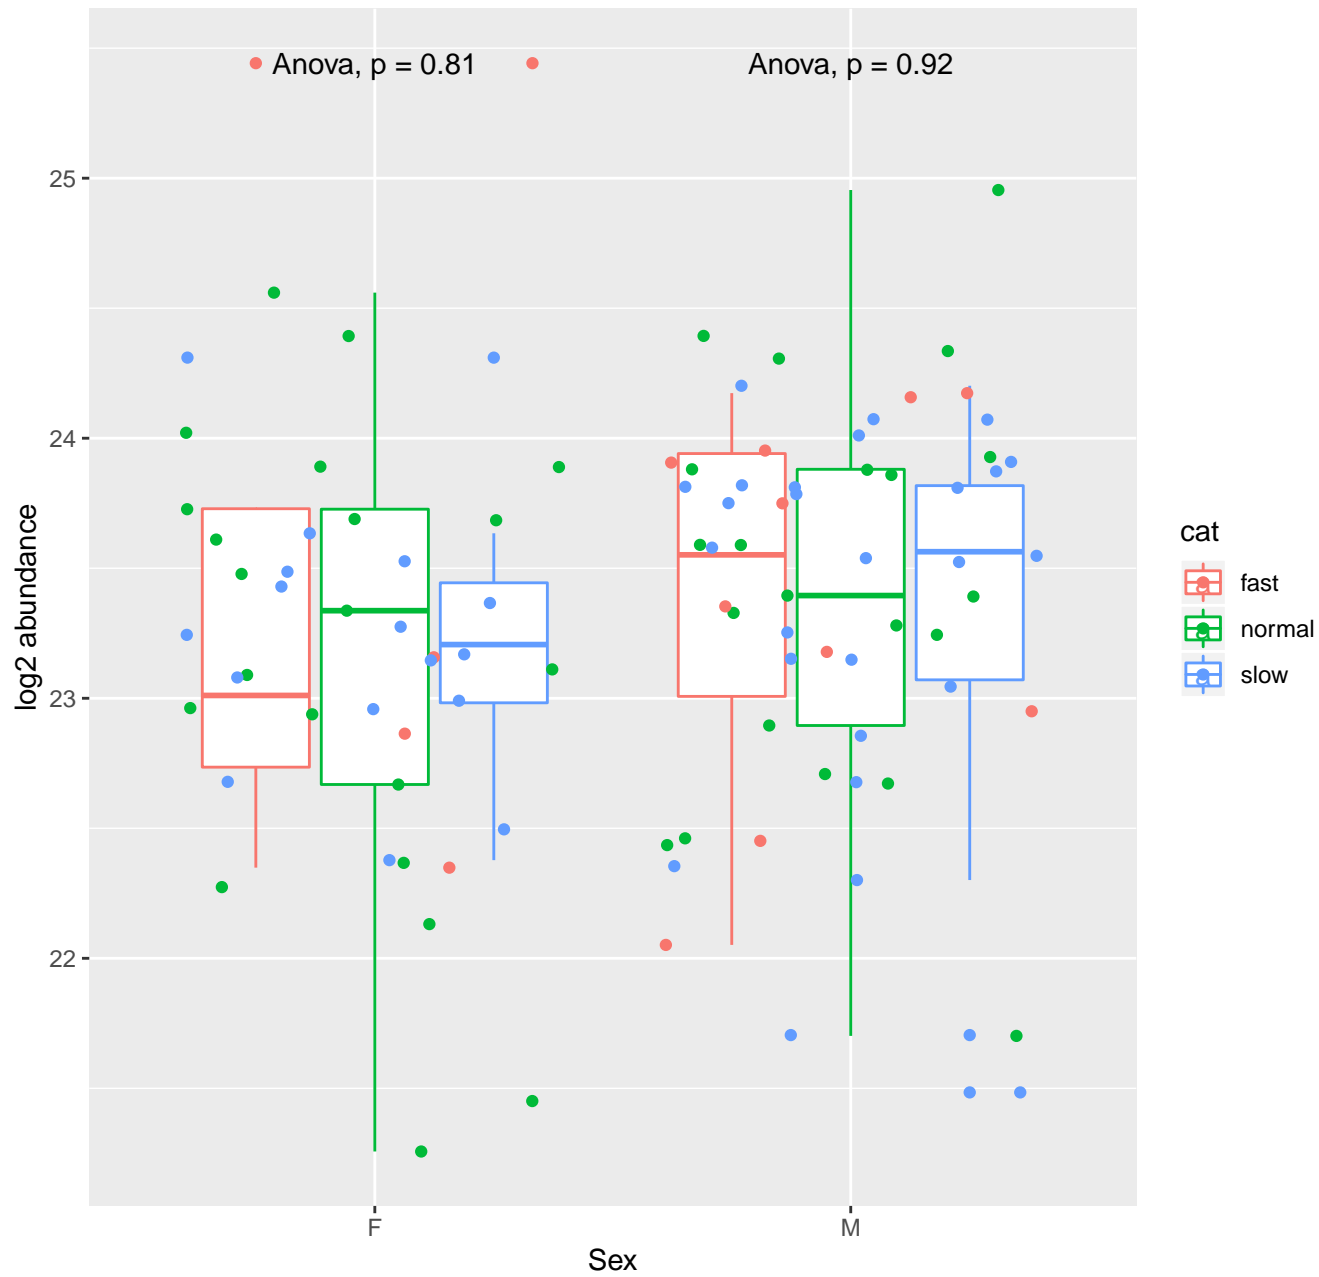

X188.0714.m.z

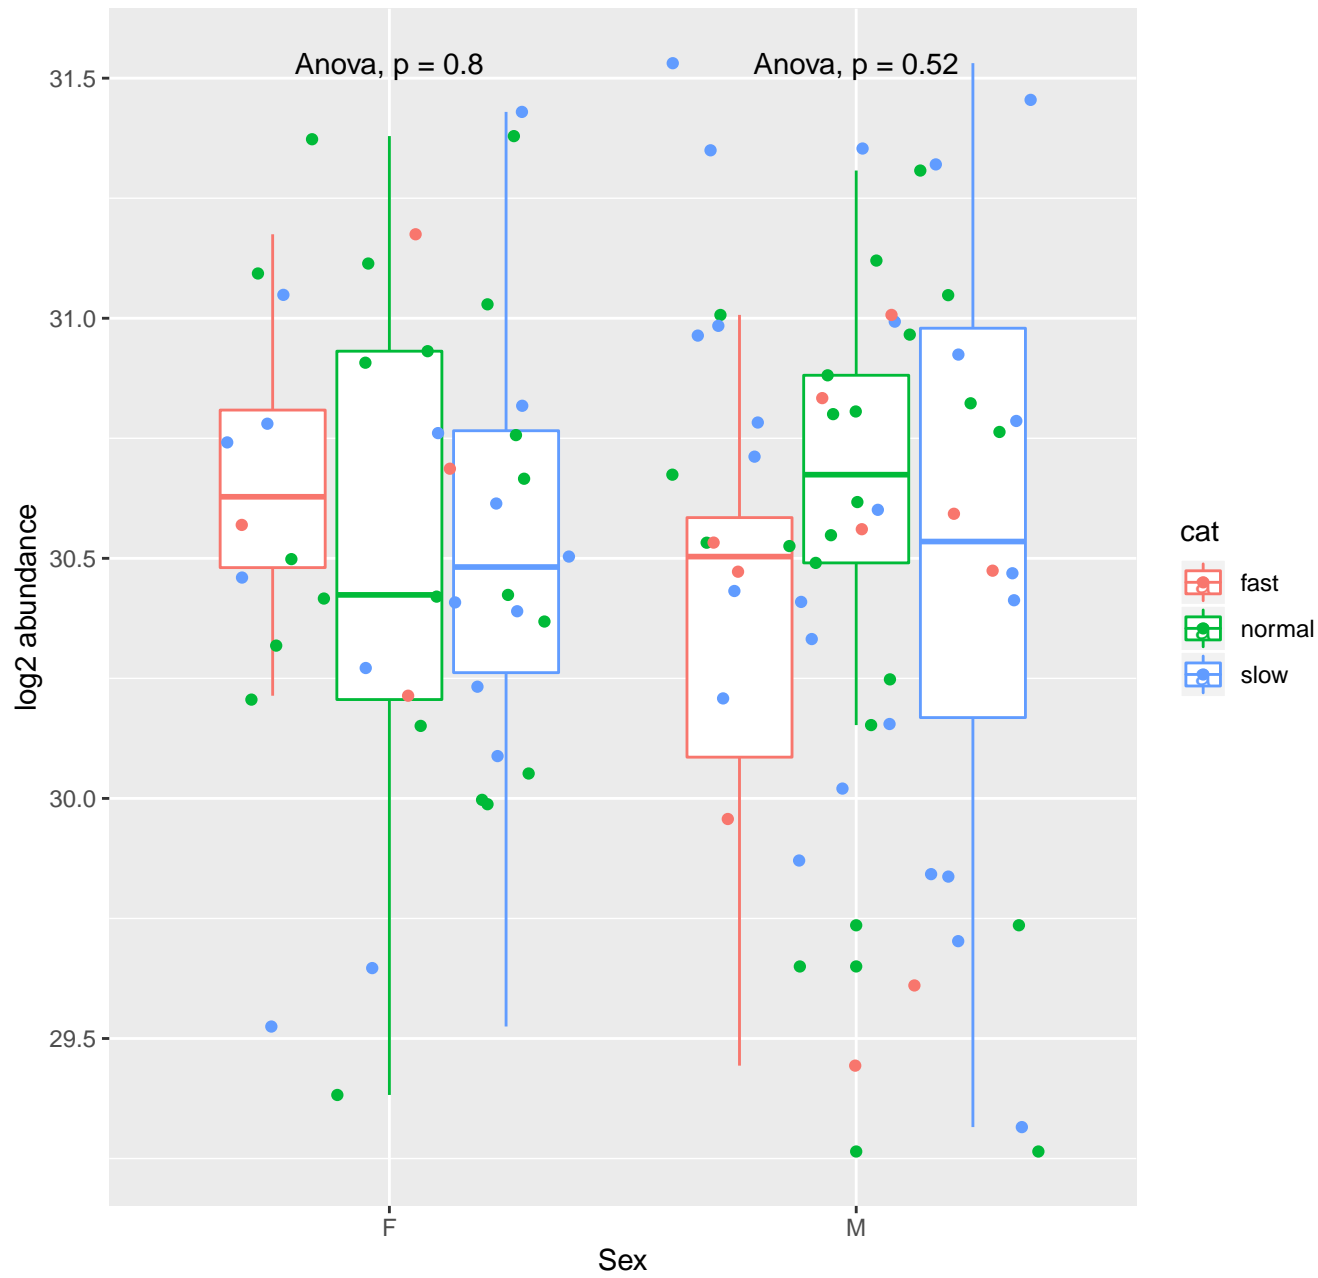

## X118.0658.m.z

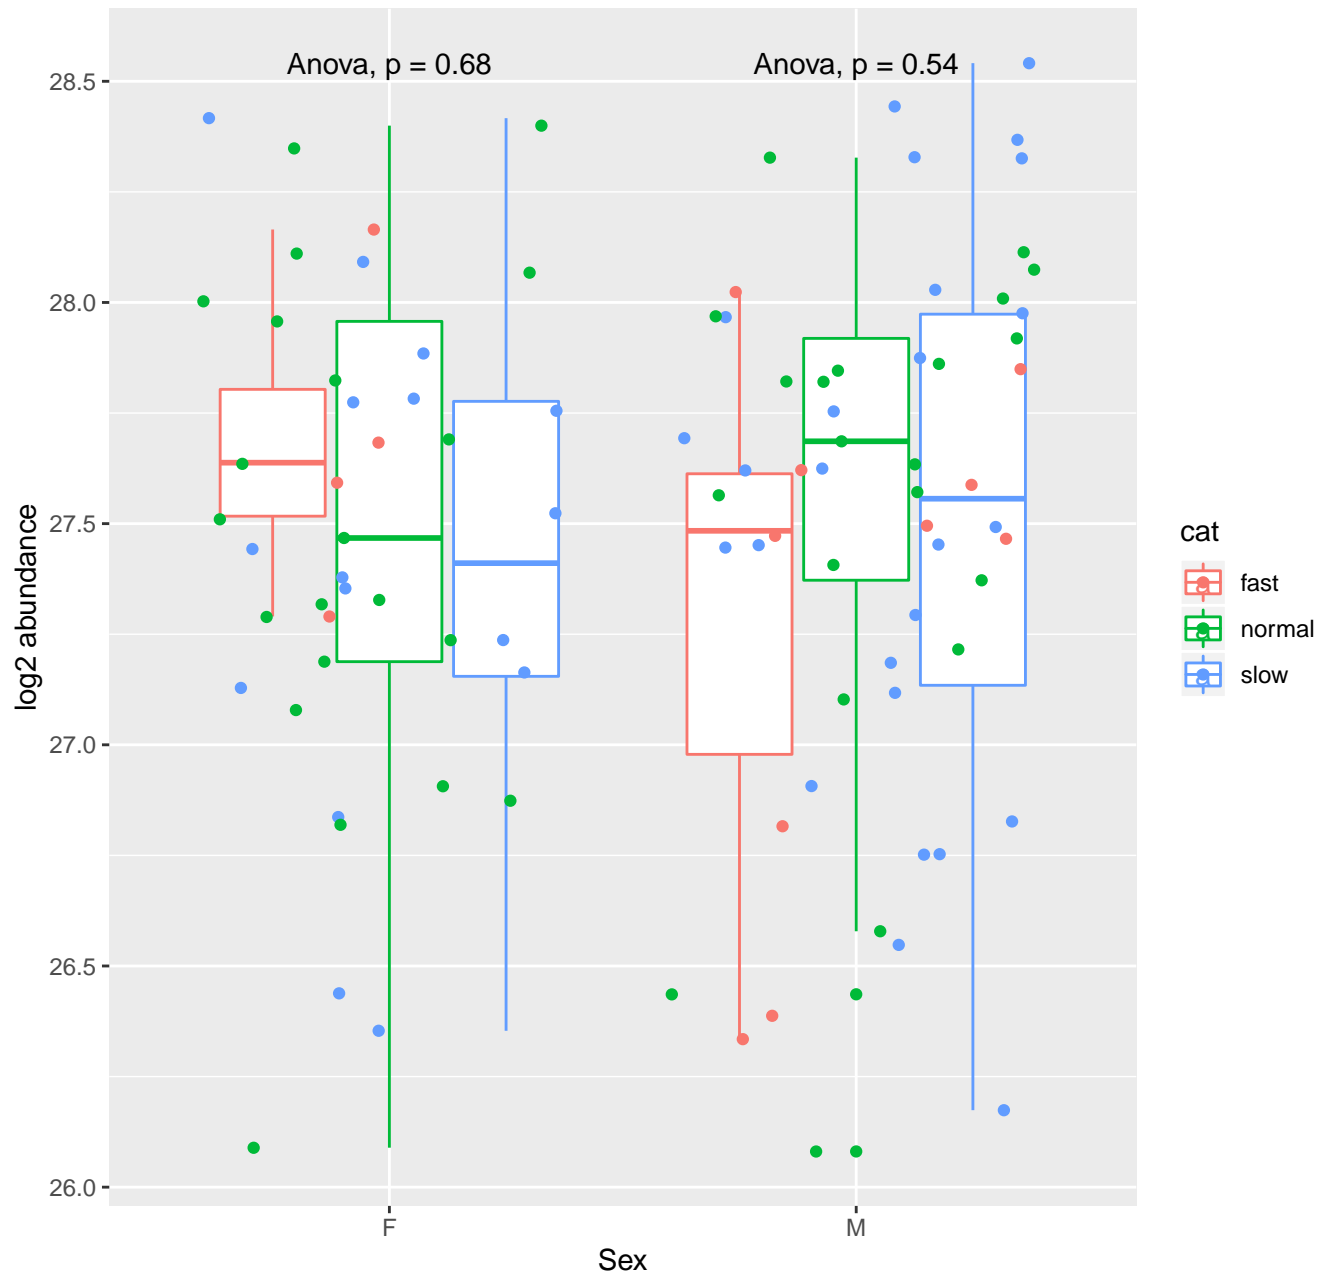

X209.0931.m.z

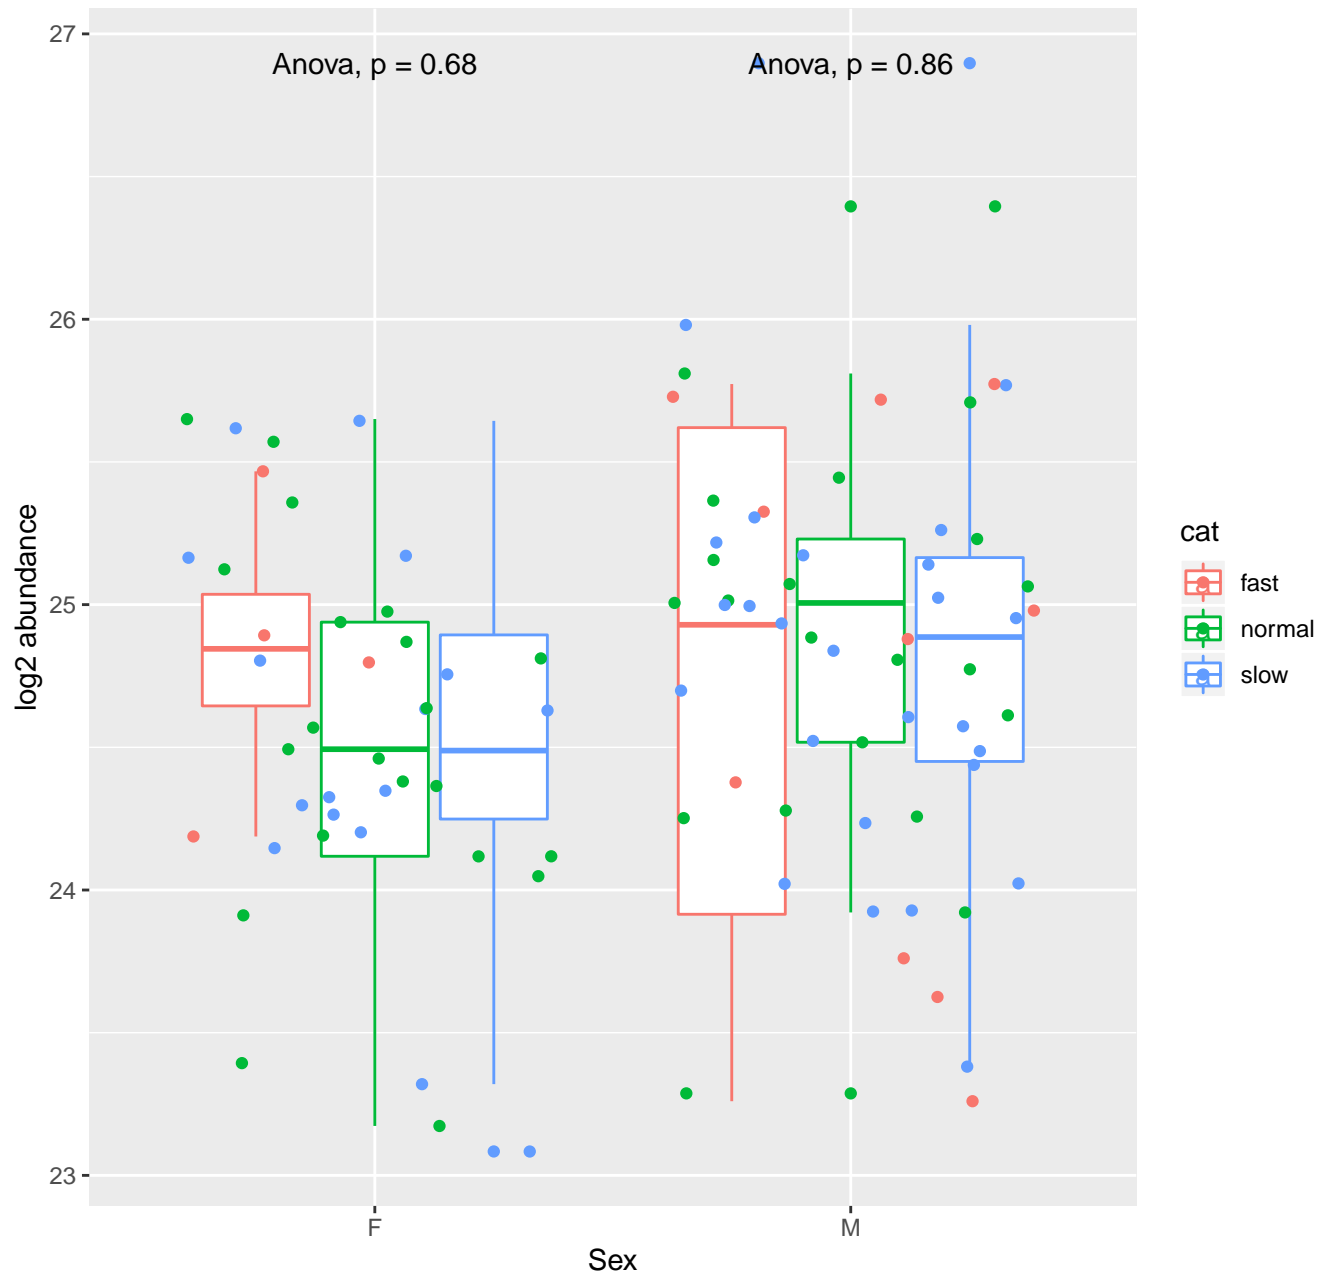

X136.0763.m.z

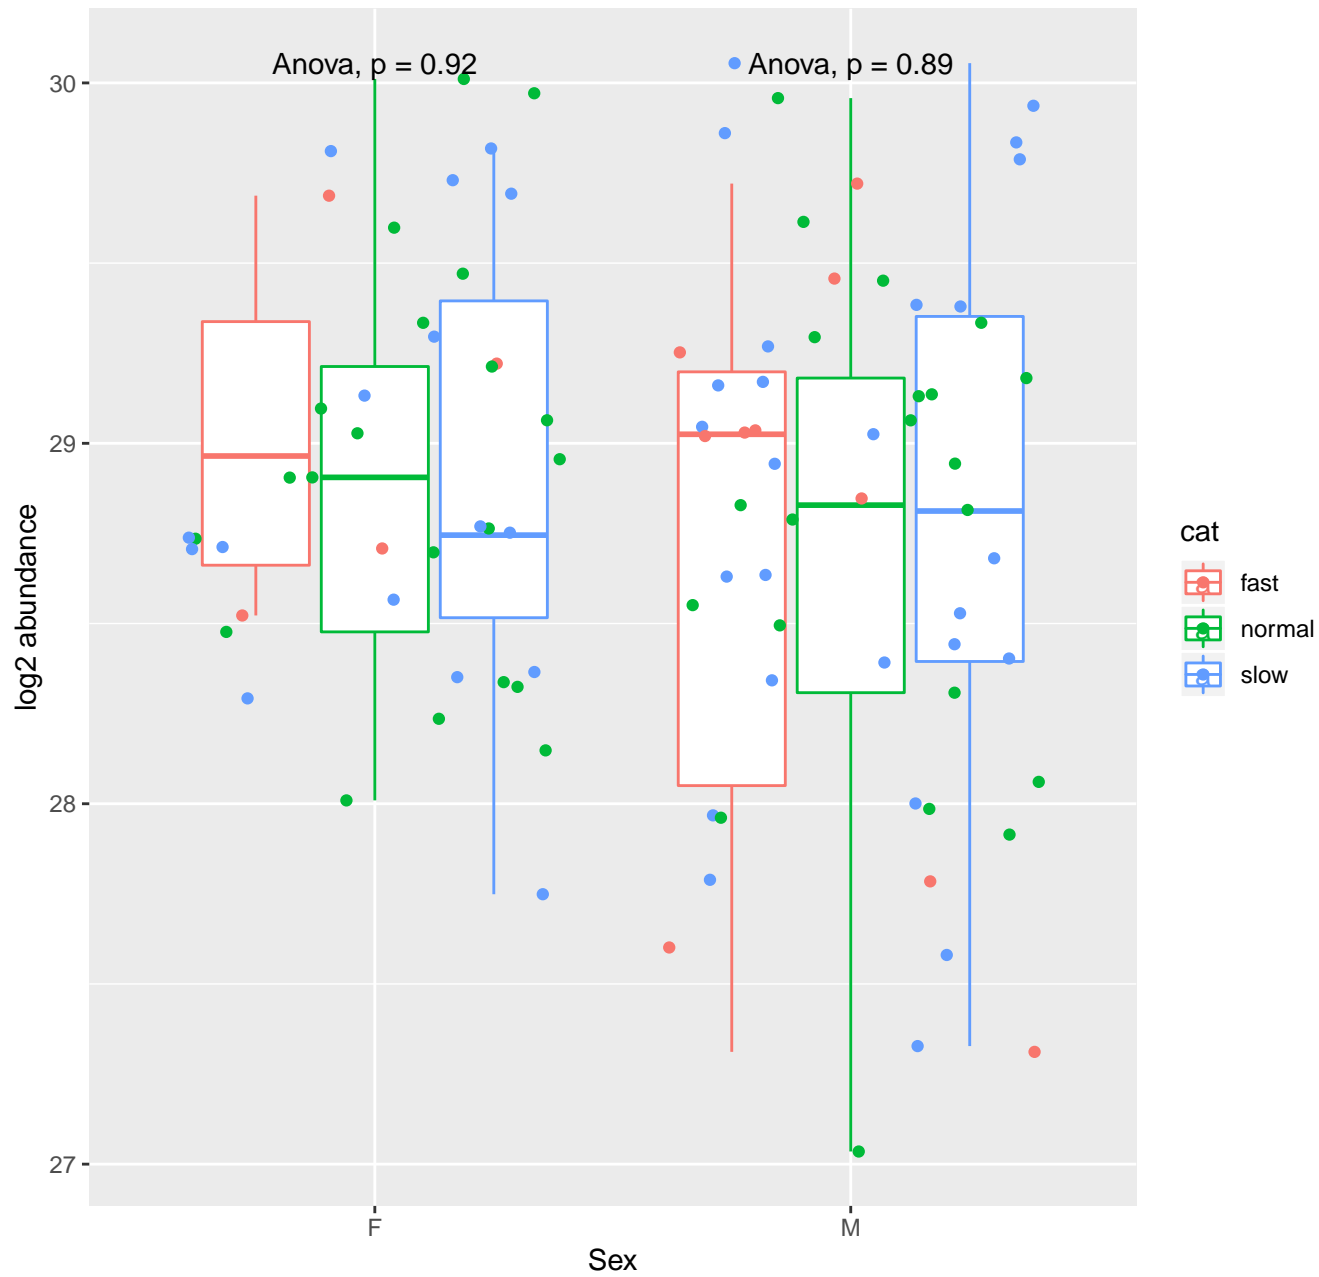

X159.0772.m.z

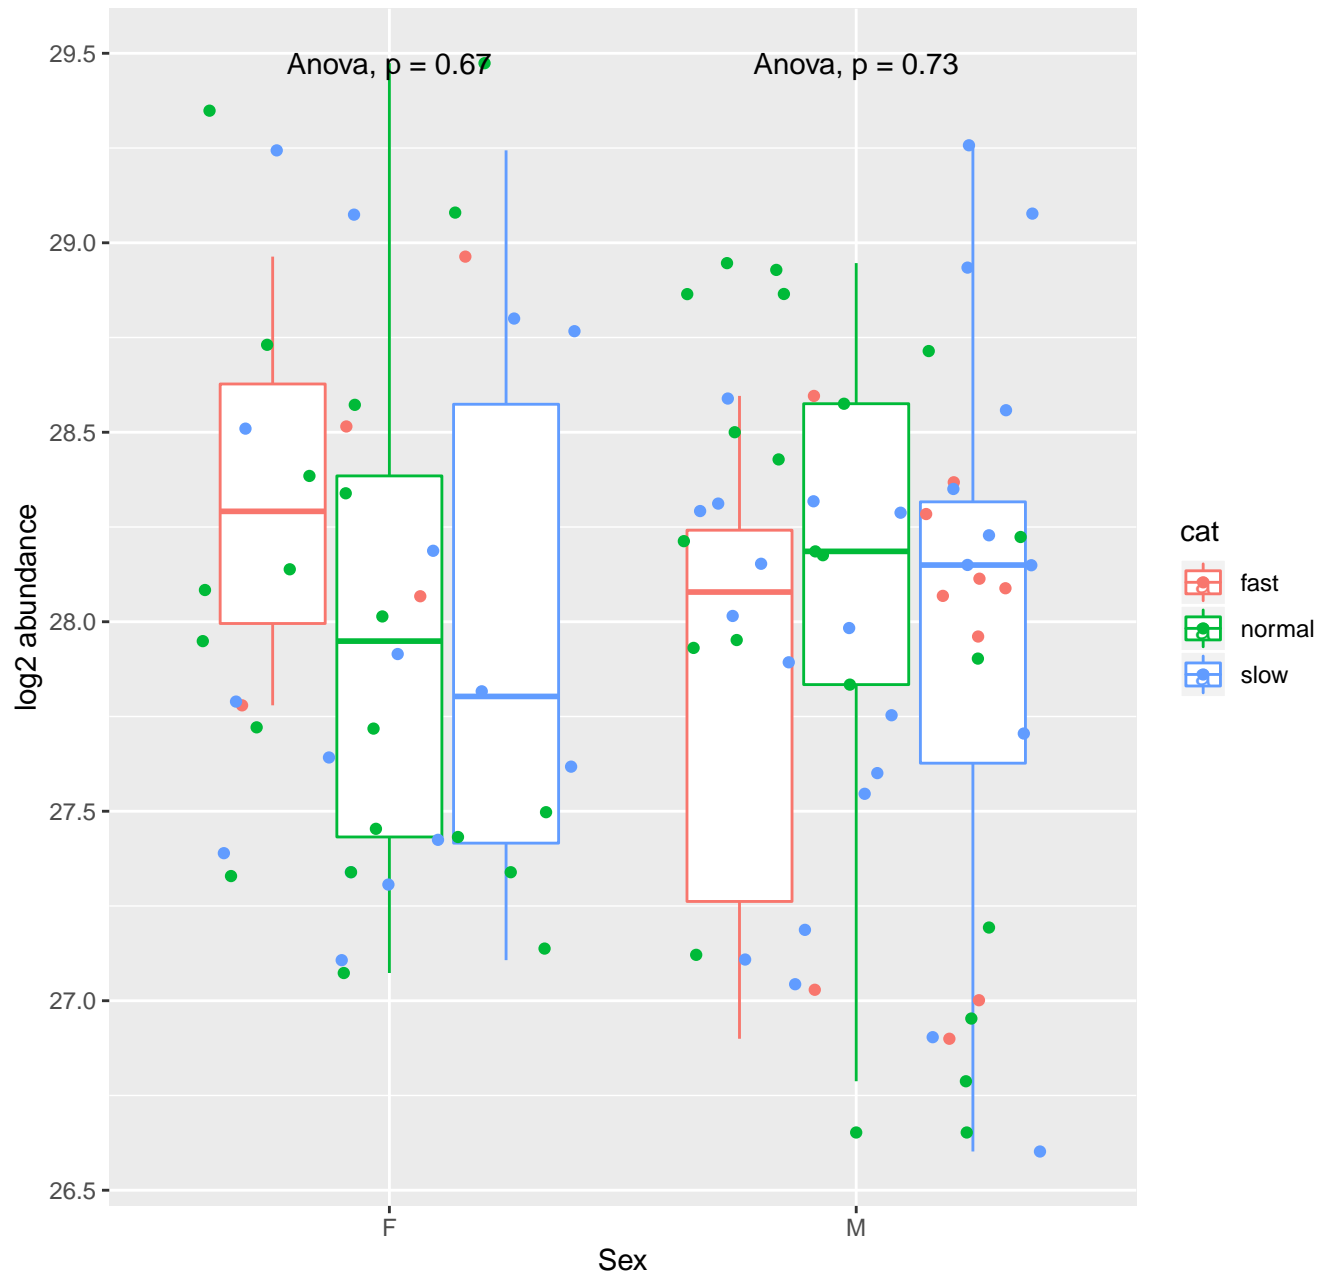

X165.0554.m.z

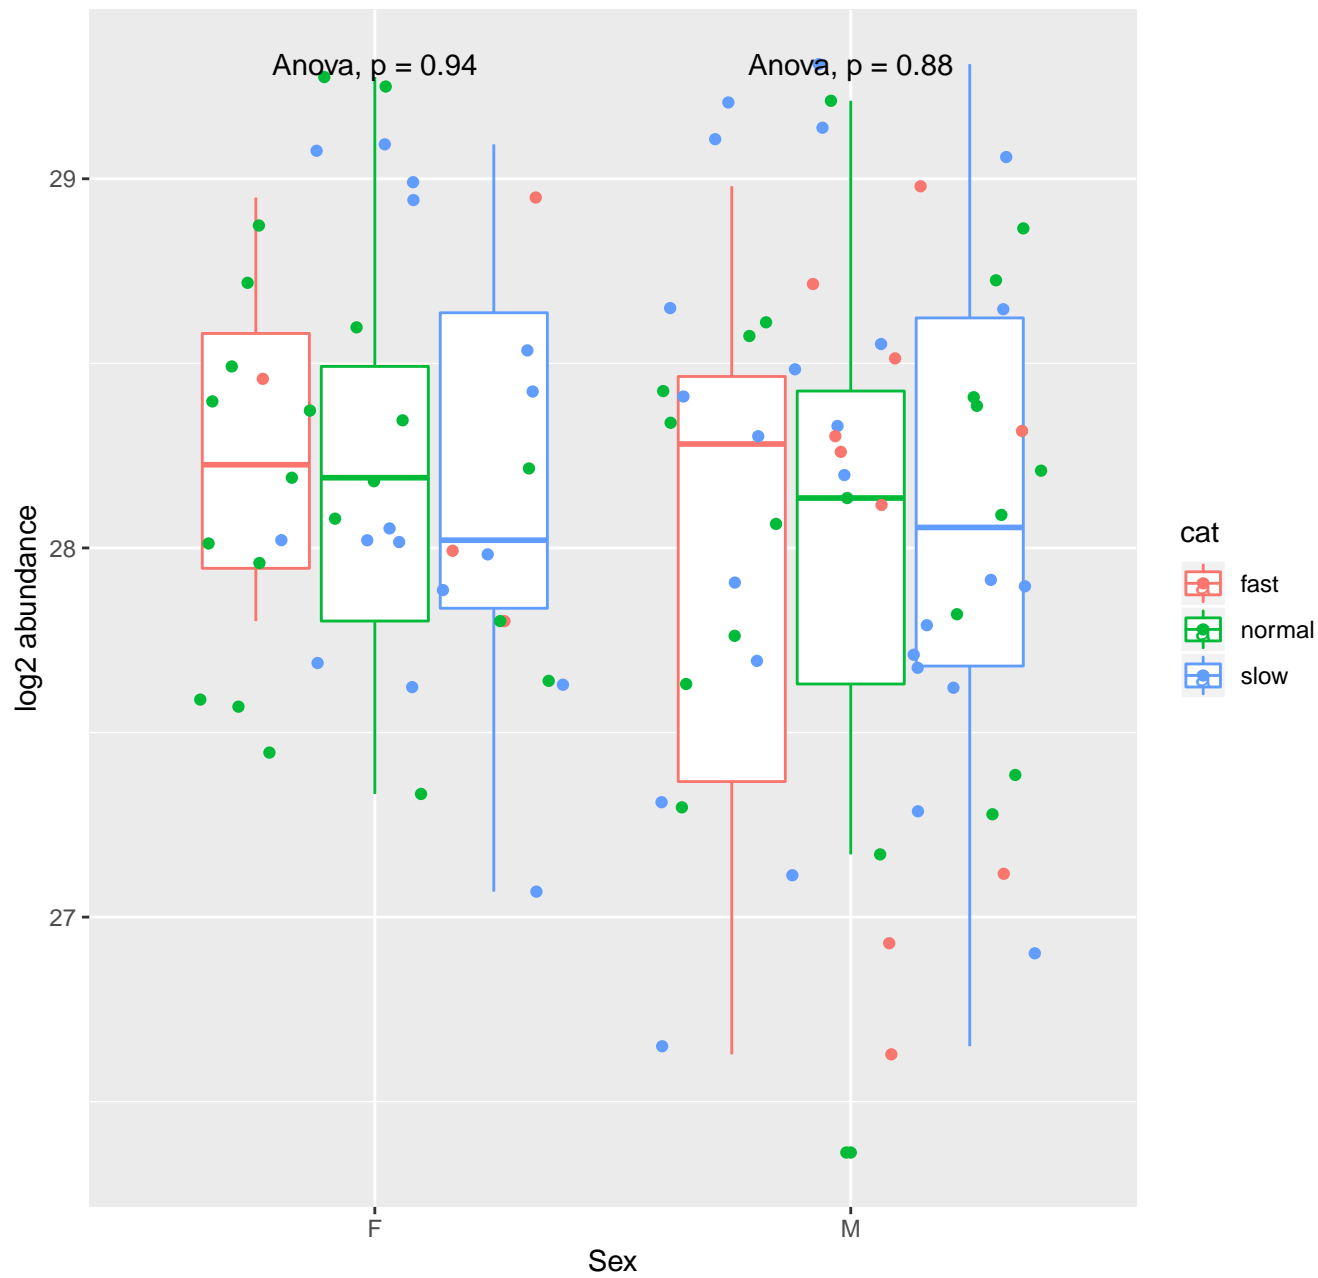

Supplement: NIHMS1611259-supplement-Supplemental_File_4.pdf [file NIHMS1611259-supplement-Supplemental_File_4.pdf]
